# Supplementary material for: Comparative toxicogenomics of three insensitive munitions constituents 2,4-dinitroanisole, nitroguanidine and nitrotriazolone in the soil nematode Caenorhabditis elegans
Source: BMC Syst Biol. 2018 Dec 14;12(Suppl 7):92. doi: 10.1186/s12918-018-0636-0 (PMC6293504; doi:10.1186/s12918-018-0636-0)
Supplement: Supplementary file 2 — Conversion of gene symbols to UniProt identifiers using the KEGG-UniProt linkage file. (XLSX 1258 kb) [file 12918_2018_636_MOESM2_ESM.xlsx]

## Sheet: KEGG-to-UniProt
File linking KEGG Genes to UniProt downloaded from KEGG LinkDB @ http://www.genome.jp/linkdb/												1185					All DEGs converted to UniProt IDs					All DEGs converted to UniProt IDs
									Differentially Expressed Genes (DEGs)			1188	78	269			1188	78	269			After removing redundant UniProt IDs within each chemical group
Organism	KEGG ID	Original UniProt ID	UniProt ID		UniProt ID redundancy				NQ-induced	NTO-induced	DNAN-induced	NQ	NTO	DNAN	Frequency		NQ	NTO	DNAN	Frequency		NQ	NTO	DNAN	1185	78	269
cel	ATP6	up:G5EFS7	G5EFS7	equivalent	Frequency	counts	unique UniProt		0	0	0				0		O45496	O45496	O45496	3		A0A061AE68	A3FPK5	A0A061AKV1	1	1	1
cel	ATP6	up:P24888	P24888	equivalent	16	16	1		0	0	0				0		P90780	P90780	P90780	3		A0A078BPH9	A5Z2U7	A0A078BPK1	1	1	1
cel:CELE	2L52.1	up:A4F336	A4F336	equivalent	15	45	3		0	0	0				0		P91253	P91253	P91253	3		A0A078BS54	A7LPJ2	A0A0K3AVC7	1	1	1
cel:CELE	2RSSE.1	up:U4PAK0	U4PAK0	equivalent	14	0	0		0	0	0				0		Q22577	Q22577	Q22577	3		A0A0H3W5N0	G5EC93	A0A0K3AXD0	1	1	1
cel:CELE	3R5.1	up:G5EFG7	G5EFG7	equivalent	13	13	1		0	0	0				0		Q23384	Q23384	Q23384	3		A0A0K2WPR7	G5ECL9	A0A0S4XR78	1	1	1
cel:CELE	4R79.1	up:Q9U3S9	Q9U3S9	equivalent	12	0	0		0	0	0				0		Q9XUH7	Q9XUH7	Q9XUH7	3		A0A0K3AQN5	G5EE24	A3FPI8	1	1	1
cel:CELE	4R79.2	up:Q9XXA4	Q9XXA4	equivalent	11	0	0		0	0	0				0		Q9XUH8	Q9XUH8	Q9XUH8	3		A0A0K3ARN3	G5EE89	A3FPJ5	1	1	1
cel:CELE	6R55.2	up:A4F335	A4F335	equivalent	10	0	0		0	0	0				0			G5EC93	G5EC93	2		A0A0K3ASA3	G5EES5	A5A8Q1	1	1	1
cel:CELE	AC3.1	up:Q17398	Q17398	equivalent	9	0	0		0	0	0				0			G5ECL9	G5ECL9	2		A0A0K3ASI8	G5EFT9	A9Z1K9	1	1	1
cel:CELE	AC3.10	up:Q5FC64	Q5FC64	equivalent	8	0	0		0	0	0				0			G5EE89	G5EE89	2		A0A0K3ASR1	O02621	B6VQ83	1	1	1
cel:CELE	AC3.12	up:H2L2B5	H2L2B5	equivalent	7	0	0		0	0	0				0			G5EES5	G5EES5	2		A0A0K3AUF6	O16214	D3YT89	1	1	1
cel:CELE	AC3.2	up:Q17399	Q17399	equivalent	6	6	1		0	0	0				0			O17155	O17155	2		A0A0K3AWM6	O16917	D5MCT5	1	1	1
cel:CELE	AC3.3	up:Q17400	Q17400	equivalent	5	5	1		0	0	0				0			O17166	O17166	2		A0A0K3AXG8	O17155	E2JKZ3	1	1	1
cel:CELE	AC3.4	up:Q17401	Q17401	equivalent	4	12	3		0	0	0				0			P91252	P91252	2		A0A0S4XR75	O17166	F0IWS9	1	1	1
cel:CELE	AC3.5	up:Q17405	Q17405	equivalent	3	15	5		0	0	0				0			P91254	P91254	2		A0FLQ5	O18030	G5EBF8	1	1	1
cel:CELE	AC3.6	up:Q17402	Q17402	equivalent	2	236	118		0	0	0				0			Q09596	Q09596	2		A0PCJ1	O44507	G5EBJ9	1	1	1
cel:CELE	AC3.7	up:Q17403	Q17403	equivalent	1	19929	19929		1	1	0	Q17403	Q17403		2			Q18470	Q18470	2		A1IMB7	O44650	G5EBZ7	1	1	1
cel:CELE	AC3.8	up:Q17404	Q17404	equivalent					1	0	0	Q17404			1			Q19202	Q19202	2		A1Z6D0	O44664	G5EC93	1	1	1
cel:CELE	AC7.1	up:Q58AU1	Q58AU1	equivalent	Total	20277	20062		0	0	0				0			Q23090	Q23090	2		A3FPI7	O45496	G5ECD0	1	1	1
cel:CELE	AC7.2	up:V6CJ50	V6CJ50	equivalent					0	0	0				0			Q27515	Q27515	2		A3FPJ0	O46024	G5ECL9	1	1	1
cel:CELE	AC7.3	up:Q7JNR0	Q7JNR0	equivalent					0	0	0				0			Q27519	Q27519	2		A3FPJ3	O61235	G5ED09	1	1	1
cel:CELE	AC8.10	up:G5EDW3	G5EDW3	equivalent					0	0	0				0			Q93698	Q93698	2		A3FPJ4	O61874	G5EDB5	1	1	1
cel:CELE	AC8.11	up:G5EFZ2	G5EFZ2	equivalent					0	0	0				0			Q94271	Q94271	2		A3FPL3	P50438	G5EDJ7	1	1	1
cel:CELE	AC8.12	up:G5ED90	G5ED90	equivalent					0	0	0				0			Q9TYY4	Q9TYY4	2		A3KFD8	P90780	G5EE89	1	1	1
cel:CELE	AC8.3	up:G5EDW3	G5EDW3	equivalent					0	0	0				0			Q9TYY5	Q9TYY5	2		A3QM98	P91252	G5EES5	1	1	1
cel:CELE	AC8.4	up:G5EFZ2	G5EFZ2	equivalent					1	0	0	G5EFZ2			1			Q9U3Q6	Q9U3Q6	2		A4F314	P91253	G5EEU8	1	1	1
cel:CELE	AC8.7	up:G5ED90	G5ED90	equivalent					0	0	0				0			Q9XUH3	Q9XUH3	2		A4F333	P91254	G5EG50	1	1	1
cel:CELE	AH10.1	up:O02200	O02200	equivalent					0	0	0				0			Q9XVB0	Q9XVB0	2		A4UVK9	Q09596	G8JZP2	1	1	1
cel:CELE	AH10.2	up:G5EF13	G5EF13	equivalent					0	0	0				0			Q9XVB4	Q9XVB4	2		A4V4W1	Q17403	G8JZP3	1	1	1
cel:CELE	AH10.3	up:O02201	O02201	equivalent					0	0	0				0			Q9XX44	Q9XX44	2		A5JYW3	Q17846	H1UBK7	1	1	1
cel:CELE	AH10.4	up:Q9XVT8	Q9XVT8	equivalent					0	0	0				0		D3YT89		D3YT89	2		A5JYW4	Q18470	H2L0Q5	1	1	1
cel:CELE	AH6.1	up:Q09435	Q09435	equivalent					0	0	0				0		G5EBF8		G5EBF8	2		A5PEW9	Q18903	H9G2S9	1	1	1
cel:CELE	AH6.10	up:Q09208	Q09208	equivalent					0	0	0				0		G5EBJ9		G5EBJ9	2		A5PEX3	Q18986	H9G327	1	1	1
cel:CELE	AH6.11	up:Q09209	Q09209	equivalent					0	0	0				0		G5EDB5		G5EDB5	2		A6ZJ72	Q19202	O01528	1	1	1
cel:CELE	AH6.12	up:Q09210	Q09210	equivalent					0	0	0				0		G5EE24	G5EE24		2		A7LPC7	Q19977	O01561	1	1	1
cel:CELE	AH6.14	up:Q09212	Q09212	equivalent					0	0	0				0		G8JZP2		G8JZP2	2		A7LPH9	Q20046	O01701	1	1	1
cel:CELE	AH6.17	up:H2L272	H2L272	equivalent					0	0	0				0		H1UBK7		H1UBK7	2		A7LPI3	Q20840	O01892	1	1	1
cel:CELE	AH6.2	up:Q09201	Q09201	equivalent					0	0	0				0		O01892		O01892	2		A8DZ49	Q21528	O01893	1	1	1
cel:CELE	AH6.3	up:Q09202	Q09202	equivalent					0	0	0				0		O16914		O16914	2		A8WFH1	Q21657	O02627	1	1	1
cel:CELE	AH6.4	up:Q09203	Q09203	equivalent					0	0	0				0		O16917	O16917		2		A8WFN8	Q22156	O02628	1	1	1
cel:CELE	AH6.5	up:Q09436	Q09436	equivalent					0	0	0				0		O16945		O16945	2		A8WI70	Q22577	O16198	1	1	1
cel:CELE	AH6.6	up:Q09204	Q09204	equivalent					0	0	0				0		O17082		O17082	2		A8WJ47	Q22814	O16215	1	1	1
cel:CELE	AH6.7	up:Q09205	Q09205	equivalent					0	0	0				0		O17263		O17263	2		A8WJ48	Q23090	O16220	1	1	1
cel:CELE	AH6.8	up:Q09206	Q09206	equivalent					0	0	0				0		O17757		O17757	2		A9Z1K7	Q23384	O16276	1	1	1
cel:CELE	AH9.1	up:Q10904	Q10904	equivalent					0	0	0				0		O17860		O17860	2		B2MZA5	Q23683	O16285	1	1	1
cel:CELE	AH9.2	up:Q10905	Q10905	equivalent					0	0	0				0		O17945		O17945	2		B3WFT6	Q27470	O16581	1	1	1
cel:CELE	AH9.3	up:Q10906	Q10906	equivalent					0	0	0				0		O18030	O18030		2		B3WFU6	Q27513	O16670	1	1	1
cel:CELE	AH9.4	up:Q10907	Q10907	equivalent					0	0	0				0		O18039		O18039	2		B3WFV1	Q27514	O16914	1	1	1
cel:CELE	AH9.6	up:Q2L6W5	Q2L6W5	equivalent					0	0	0				0		O44590		O44590	2		B3WFZ3	Q27515	O16945	1	1	1
cel:CELE	B0001.1	up:Q17410	Q17410	equivalent					0	0	0				0		O44650	O44650		2		B5U8N4	Q27519	O16976	1	1	1
cel:CELE	B0001.2	up:Q17411	Q17411	equivalent					0	0	0				0		O44664	O44664		2		B5U8N9	Q4R138	O17041	1	1	1
cel:CELE	B0001.3	up:A0A061ACH8	A0A061ACH8	equivalent					0	0	0				0		O44667		O44667	2		B9WRT9	Q75MI6	O17082	1	1	1
cel:CELE	B0001.4	up:Q17413	Q17413	equivalent					0	0	0				0		O45144		O45144	2		C1P623	Q7YTR9	O17155	1	1	1
cel:CELE	B0001.5	up:Q17414	Q17414	equivalent					0	0	0				0		O45364		O45364	2		C7FZV0	Q7YWR0	O17166	1	1	1
cel:CELE	B0001.6	up:Q17415	Q17415	equivalent					0	0	0				0		O45518		O45518	2		C7IVQ8	Q7YX03	O17263	1	1	1
cel:CELE	B0001.7	up:Q17416	Q17416	equivalent					0	0	0				0		O61736		O61736	2		C7IVR7	Q86DA6	O17620	1	1	1
cel:CELE	B0001.8	up:Q8WQH2	Q8WQH2	equivalent					0	0	0				0		O61799		O61799	2		C8JQS8	Q8MYL7	O17621	1	1	1
cel:CELE	B0019.1	up:Q9XXU5	Q9XXU5	equivalent					1	0	0	Q9XXU5			1		O61958		O61958	2		D2N113	Q8MYN6	O17705	1	1	1
cel:CELE	B0019.2	up:G5EBL4	G5EBL4	equivalent					0	0	0				0		O62093		O62093	2		D2YW03	Q93698	O17721	1	1	1
cel:CELE	B0024.1	up:Q17417	Q17417	equivalent					0	0	0				0		O62377		O62377	2		D3KFU5	Q94271	O17757	1	1	1
cel:CELE	B0024.10	up:Q17425	Q17425	equivalent					0	0	0				0		O62385		O62385	2		D3YT89	Q95YE0	O17795	1	1	1
cel:CELE	B0024.11	up:Q17426	Q17426	equivalent					0	0	0				0		O76357		O76357	2		D7SFJ0	Q9N5C0	O17860	1	1	1
cel:CELE	B0024.12	up:Q17427	Q17427	equivalent					0	0	0				0		O76358		O76358	2		F3Y5Q1	Q9N5T2	O17945	1	1	1
cel:CELE	B0024.13	up:Q17428	Q17428	equivalent					0	0	0				0		O76410		O76410	2		F5GUE5	Q9NAJ8	O18038	1	1	1
cel:CELE	B0024.14	up:G5EF34	G5EF34	equivalent					0	0	0				0		P34272		P34272	2		G3MTY1	Q9TYY4	O18039	1	1	1
cel:CELE	B0024.15	up:Q8MQG4	Q8MQG4	equivalent					0	0	0				0		P50438	P50438		2		G3MU02	Q9TYY5	O18693	1	1	1
cel:CELE	B0024.2	up:Q17418	Q17418	equivalent					0	0	0				0		P91228		P91228	2		G3MU36	Q9U1Q8	O44590	1	1	1
cel:CELE	B0024.3	up:Q17419	Q17419	equivalent					0	0	0				0		P91370		P91370	2		G4S428	Q9U3E5	O44607	1	1	1
cel:CELE	B0024.4	up:Q17420	Q17420	equivalent					0	0	0				0		Q03572		Q03572	2		G4SF79	Q9U3E7	O44620	1	1	1
cel:CELE	B0024.6	up:N1NVB7	N1NVB7	equivalent					0	0	0				0		Q10915		Q10915	2		G5EBF8	Q9U3Q6	O44649	1	1	1
cel:CELE	B0024.8	up:Q17423	Q17423	equivalent					0	0	0				0		Q17403	Q17403		2		G5EBG4	Q9XUH3	O44667	1	1	1
cel:CELE	B0024.9	up:Q17424	Q17424	equivalent					0	0	0				0		Q17846	Q17846		2		G5EBJ9	Q9XUH7	O45144	1	1	1
cel:CELE	B0025.1	up:Q9TXI7	Q9TXI7	equivalent					0	0	0				0		Q18020		Q18020	2		G5EBK1	Q9XUH8	O45220	1	1	1
cel:CELE	B0025.2	up:O01422	O01422	equivalent					0	0	0				0		Q18256		Q18256	2		G5EBP0	Q9XVB0	O45234	1	1	1
cel:CELE	B0025.4	up:Q8WQC3	Q8WQC3	equivalent					0	0	0				0		Q18645		Q18645	2		G5EBR4	Q9XVB4	O45237	1	1	1
cel:CELE	B0025.5	up:C7FZT5	C7FZT5	equivalent					0	0	0				0		Q18898		Q18898	2		G5EBR9	Q9XX44	O45364	1	1	1
cel:CELE	B0034.1	up:Q10910	Q10910	equivalent					1	0	0	Q10910			1		Q19231		Q19231	2		G5EC14	Q9XXD0	O45496	1	1	1
cel:CELE	B0034.2	up:Q10903	Q10903	equivalent					0	0	0				0		Q19451		Q19451	2		G5EC41	Q9XXF1	O45518	1	1	1
cel:CELE	B0034.3	up:G5ED46	G5ED46	equivalent					0	0	0				0		Q19774		Q19774	2		G5EC68		O45681	1		1
cel:CELE	B0034.4	up:Q10912	Q10912	equivalent					0	0	0				0		Q19977	Q19977		2		G5EC84		O45991	1		1
cel:CELE	B0034.5	up:Q10913	Q10913	equivalent					0	0	0				0		Q1ZXS1		Q1ZXS1	2		G5ECG9		O61204	1		1
cel:CELE	B0034.7	up:Q4TTB9	Q4TTB9	equivalent					0	0	0				0		Q20331		Q20331	2		G5ECJ2		O61736	1		1
cel:CELE	B0035.1	up:Q9U3S8	Q9U3S8	equivalent					0	0	0				0		Q20747		Q20747	2		G5ECP4		O61750	1		1
cel:CELE	B0035.10	up:K7ZUH9	K7ZUH9	equivalent					0	0	0				0		Q21327		Q21327	2		G5ECR6		O61799	1		1
cel:CELE	B0035.10	up:P08898	P08898	equivalent					0	0	0				0		Q21657	Q21657		2		G5ECT2		O61891	1		1
cel:CELE	B0035.11	up:Q17431	Q17431	equivalent					0	0	0				0		Q22614		Q22614	2		G5ED14		O61958	1		1
cel:CELE	B0035.12	up:Q17430	Q17430	equivalent					0	0	0				0		Q27513	Q27513		2		G5ED43		O62093	1		1
cel:CELE	B0035.13	up:Q17437	Q17437	equivalent					0	0	0				0		Q2V4T5		Q2V4T5	2		G5ED56		O62112	1		1
cel:CELE	B0035.14	up:Q17438	Q17438	equivalent					0	0	0				0		Q4R162		Q4R162	2		G5ED64		O62243	1		1
cel:CELE	B0035.15	up:Q17439	Q17439	equivalent					0	0	0				0		Q4TTB5		Q4TTB5	2		G5ED91		O62377	1		1
cel:CELE	B0035.16	up:Q17440	Q17440	equivalent					0	0	0				0		Q6LCK7		Q6LCK7	2		G5EDB5		O62385	1		1
cel:CELE	B0035.18	up:Q52GY9	Q52GY9	equivalent					0	0	0				0		Q75MI6	Q75MI6		2		G5EDJ4		O62492	1		1
cel:CELE	B0035.2	up:Q17433	Q17433	equivalent					0	0	0				0		Q7KPV8		Q7KPV8	2		G5EDK7		O62498	1		1
cel:CELE	B0035.21	up:L8E7Z0	L8E7Z0	equivalent					0	0	0				0		Q7YTM1		Q7YTM1	2		G5EDL5		O76357	1		1
cel:CELE	B0035.3	up:Q17432	Q17432	equivalent					0	0	0				0		Q7YWR0	Q7YWR0		2		G5EDM5		O76358	1		1
cel:CELE	B0035.4	up:Q17435	Q17435	equivalent					0	0	0				0		Q7YX03	Q7YX03		2		G5EDP2		O76410	1		1
cel:CELE	B0035.5	up:Q27464	Q27464	equivalent					0	0	0				0		Q7YX60		Q7YX60	2		G5EE21		P17512	1		1
cel:CELE	B0035.6	up:Q17436	Q17436	equivalent					0	0	0				0		Q86DA6	Q86DA6		2		G5EE24		P18947	1		1
cel:CELE	B0035.7	up:P09588	P09588	equivalent					0	0	0				0		Q8MYN6	Q8MYN6		2		G5EEA2		P34272	1		1
cel:CELE	B0035.8	up:Q27876	Q27876	equivalent					0	0	0				0		Q8WTM3		Q8WTM3	2		G5EEA5		P34293	1		1
cel:CELE	B0035.9	up:P62784	P62784	equivalent					0	0	0				0		Q95XK8		Q95XK8	2		G5EEC6		P34345	1		1
cel:CELE	B0041.1	up:O02060	O02060	equivalent					0	0	0				0		Q965W4		Q965W4	2		G5EED4		P34712	1		1
cel:CELE	B0041.11	up:E4MVC4	E4MVC4	equivalent					0	0	0				0		Q966B7		Q966B7	2		G5EEE7		P54145	1		1
cel:CELE	B0041.2	up:H2KY58	H2KY58	equivalent					0	0	0				0		Q966B8		Q966B8	2		G5EEE9		P55155	1		1
cel:CELE	B0041.3	up:O02055	O02055	equivalent					0	0	0				0		Q9GYR7		Q9GYR7	2		G5EEI1		P90780	1		1
cel:CELE	B0041.4	up:O02056	O02056	equivalent					0	0	0				0		Q9N4P0		Q9N4P0	2		G5EEK1		P91039	1		1
cel:CELE	B0041.5	up:O02057	O02057	equivalent					0	0	0				0		Q9N5G4		Q9N5G4	2		G5EEQ1		P91228	1		1
cel:CELE	B0041.6	up:O02058	O02058	equivalent					0	0	0				0		Q9N5T2	Q9N5T2		2		G5EEQ2		P91252	1		1
cel:CELE	B0041.7	up:Q9U7E0	Q9U7E0	equivalent					0	0	0				0		Q9NA97		Q9NA97	2		G5EEU2		P91253	1		1
cel:CELE	B0041.8	up:Q95R19	Q95R19	equivalent					0	0	0				0		Q9NAJ8	Q9NAJ8		2		G5EEV9		P91254	1		1
cel:CELE	B0047.1	up:Q3V5H9	Q3V5H9	equivalent					0	0	0				0		Q9TXZ4		Q9TXZ4	2		G5EEX4		P91362	1		1
cel:CELE	B0047.3	up:O16566	O16566	equivalent					0	0	0				0		Q9TXZ6		Q9TXZ6	2		G5EF35		P91369	1		1
cel:CELE	B0047.4	up:O16567	O16567	equivalent					0	0	0				0		Q9U2E4		Q9U2E4	2		G5EF53		P91370	1		1
cel:CELE	B0198.1	up:Q17441	Q17441	equivalent					0	0	0				0		Q9U3E5	Q9U3E5		2		G5EFA9		Q03572	1		1
cel:CELE	B0198.2	up:D0VWN1	D0VWN1	equivalent					0	0	0				0		Q9U3E7	Q9U3E7		2		G5EFG0		Q07085	1		1
cel:CELE	B0198.3	up:Q17443	Q17443	equivalent					0	0	0				0		Q9UAT1		Q9UAT1	2		G5EFJ3		Q09486	1		1
cel:CELE	B0205.1	up:H2KY62	H2KY62	equivalent					0	0	0				0		Q9XU55		Q9XU55	2		G5EFP4		Q09596	1		1
cel:CELE	B0205.10	up:O61747	O61747	equivalent					0	0	0				0		Q9XV91		Q9XV91	2		G5EFT7		Q0MQ67	1		1
cel:CELE	B0205.11	up:Q95X39	Q95X39	equivalent					0	0	0				0		Q9XX08		Q9XX08	2		G5EFV1		Q10915	1		1
cel:CELE	B0205.12	up:Q4W4Z5	Q4W4Z5	equivalent					0	0	0				0		Q9XXF1	Q9XXF1		2		G5EFZ2		Q17658	1		1
cel:CELE	B0205.13	up:Q336L1	Q336L1	equivalent					0	0	0				0		Q9XXH0		Q9XXH0	2		G5EG20		Q17704	1		1
cel:CELE	B0205.14	up:Q336L2	Q336L2	equivalent					0	0	0				0				A0A061AKV1	1		G5EG36		Q17724	1		1
cel:CELE	B0205.2	up:Q5F4U1	Q5F4U1	equivalent					0	0	0				0				A0A078BPK1	1		G5EG39		Q17726	1		1
cel:CELE	B0205.3	up:O61742	O61742	equivalent					0	0	0				0				A0A0K3AVC7	1		G5EG82		Q17738	1		1
cel:CELE	B0205.4	up:O61739	O61739	equivalent					0	0	0				0				A0A0K3AXD0	1		G5EG90		Q17938	1		1
cel:CELE	B0205.5	up:O61740	O61740	equivalent					0	0	0				0				A0A0S4XR78	1		G5EG92		Q18020	1		1
cel:CELE	B0205.6	up:O61741	O61741	equivalent					0	0	0				0				A3FPI8	1		G5EG96		Q18256	1		1
cel:CELE	B0205.7	up:P18334	P18334	equivalent					0	0	0				0				A3FPJ5	1		G5EG98		Q18470	1		1
cel:CELE	B0205.8	up:O61743	O61743	equivalent					0	0	0				0				A5A8Q1	1		G5EGH6		Q18492	1		1
cel:CELE	B0205.9	up:O61745	O61745	equivalent					0	0	0				0				A9Z1K9	1		G5EGJ4		Q18645	1		1
cel:CELE	B0207.1	up:O01435	O01435	equivalent					0	0	0				0				B6VQ83	1		G5EGU4		Q18898	1		1
cel:CELE	B0207.10	up:O01433	O01433	equivalent					0	0	0				0				D5MCT5	1		G8JLY0		Q18927	1		1
cel:CELE	B0207.11	up:O01434	O01434	equivalent					0	0	0				0				E2JKZ3	1		G8JZP2		Q19035	1		1
cel:CELE	B0207.12	up:Q95Q97	Q95Q97	equivalent					0	0	0				0				F0IWS9	1		H1UBK7		Q19036	1		1
cel:CELE	B0207.2	up:O01431	O01431	equivalent					0	0	0				0				G5EBZ7	1		H2FLH0		Q19111	1		1
cel:CELE	B0207.3	up:Q9BIG2	Q9BIG2	equivalent					0	0	0				0				G5ECD0	1		H2FLI1		Q19202	1		1
cel:CELE	B0207.4	up:O01427	O01427	equivalent					0	0	0				0				G5ED09	1		H2KZA9		Q19231	1		1
cel:CELE	B0207.5	up:A0A078BTN1	A0A078BTN1	equivalent					0	0	0				0				G5EDJ7	1		H2KZI0		Q19451	1		1
cel:CELE	B0207.6	up:O01426	O01426	equivalent					0	0	0				0				G5EEU8	1		H2L0G1		Q19590	1		1
cel:CELE	B0207.7	up:O01429	O01429	equivalent					0	0	0				0				G5EG50	1		H9G2S4		Q19649	1		1
cel:CELE	B0207.8	up:O01430	O01430	equivalent					0	0	0				0				G8JZP3	1		H9G2W0		Q19734	1		1
cel:CELE	B0207.9	up:O01432	O01432	equivalent					0	0	0				0				H2L0Q5	1		H9G2Z6		Q19774	1		1
cel:CELE	B0212.1	up:U4PEQ1	U4PEQ1	equivalent					0	0	0				0				H9G2S9	1		H9G342		Q1EPL7	1		1
cel:CELE	B0212.2	up:Q5CCI4	Q5CCI4	equivalent					0	0	0				0				H9G327	1		J7SF87		Q1ZXS1	1		1
cel:CELE	B0212.3	up:O45063	O45063	equivalent					0	0	0				0				O01528	1		K7ZUH9		Q20106	1		1
cel:CELE	B0212.4	up:H2KY64	H2KY64	equivalent					0	0	0				0				O01561	1		K8ESM2		Q20331	1		1
cel:CELE	B0212.5	up:G5EBV8	G5EBV8	equivalent					0	0	0				0				O01701	1		K8ESM7		Q20506	1		1
cel:CELE	B0213.10	up:O44655	O44655	equivalent					0	0	0				0				O01893	1		K8FE10		Q20603	1		1
cel:CELE	B0213.11	up:O44656	O44656	equivalent					0	0	0				0				O02627	1		L8E826		Q20615	1		1
cel:CELE	B0213.12	up:O44657	O44657	equivalent					0	0	0				0				O02628	1		O01457		Q20747	1		1
cel:CELE	B0213.14	up:O44658	O44658	equivalent					0	0	0				0				O16198	1		O01459		Q20968	1		1
cel:CELE	B0213.15	up:H2KY68	H2KY68	equivalent					0	0	0				0				O16215	1		O01584		Q21211	1		1
cel:CELE	B0213.16	up:O61204	O61204	equivalent					0	0	1			O61204	1				O16220	1		O01595		Q21327	1		1
cel:CELE	B0213.17	up:Q8MNX6	Q8MNX6	equivalent					0	0	0				0				O16276	1		O01609		Q21545	1		1
cel:CELE	B0213.2	up:O44666	O44666	equivalent					0	0	0				0				O16285	1		O01614		Q21700	1		1
cel:CELE	B0213.3	up:O44665	O44665	equivalent					1	0	0	O44665			1				O16581	1		O01626		Q22034	1		1
cel:CELE	B0213.4	up:O44664	O44664	equivalent					1	1	0	O44664	O44664		2				O16670	1		O01627		Q22176	1		1
cel:CELE	B0213.5	up:O44663	O44663	equivalent					0	0	0				0				O16976	1		O01661		Q22260	1		1
cel:CELE	B0213.6	up:O44662	O44662	equivalent					1	0	0	O44662			1				O17041	1		O01662		Q22337	1		1
cel:CELE	B0213.7	up:O44661	O44661	equivalent					0	0	0				0				O17620	1		O01780		Q22577	1		1
cel:CELE	B0213.8	up:O44660	O44660	equivalent					0	0	0				0				O17621	1		O01847		Q22614	1		1
cel:CELE	B0213.9	up:O44654	O44654	equivalent					0	0	0				0				O17705	1		O01862		Q22738	1		1
cel:CELE	B0218.1	up:Q17449	Q17449	equivalent					0	0	0				0				O17721	1		O01865		Q22835	1		1
cel:CELE	B0218.2	up:Q17447	Q17447	equivalent					0	0	0				0				O17795	1		O01879		Q22966	1		1
cel:CELE	B0218.3	up:Q17446	Q17446	equivalent					0	0	0				0				O18038	1		O01887		Q22977	1		1
cel:CELE	B0218.5	up:Q17448	Q17448	equivalent					0	0	0				0				O18693	1		O01892		Q23068	1		1
cel:CELE	B0218.6	up:Q17450	Q17450	equivalent					0	0	0				0				O44607	1		O02040		Q23090	1		1
cel:CELE	B0218.7	up:Q17451	Q17451	equivalent					0	0	0				0				O44620	1		O02051		Q23091	1		1
cel:CELE	B0218.8	up:Q17452	Q17452	equivalent					1	0	0	Q17452			1				O44649	1		O02098		Q23199	1		1
cel:CELE	B0222.1	up:Q17453	Q17453	equivalent					0	0	0				0				O45220	1		O02132		Q23384	1		1
cel:CELE	B0222.10	up:Q8WQH1	Q8WQH1	equivalent					0	0	0				0				O45234	1		O02145		Q23455	1		1
cel:CELE	B0222.11	up:Q4PIU5	Q4PIU5	equivalent					0	0	0				0				O45237	1		O02167		Q23564	1		1
cel:CELE	B0222.15	up:U4PF43	U4PF43	equivalent					0	0	0				0				O45681	1		O02236		Q27471	1		1
cel:CELE	B0222.2	up:Q17454	Q17454	equivalent					1	0	0	Q17454			1				O45991	1		O02268		Q27505	1		1
cel:CELE	B0222.3	up:Q17455	Q17455	equivalent					0	0	0				0				O61204	1		O02303		Q27506	1		1
cel:CELE	B0222.4	up:Q17456	Q17456	equivalent					1	0	0	Q17456			1				O61750	1		O02357		Q27507	1		1
cel:CELE	B0222.5	up:Q17457	Q17457	equivalent					0	0	0				0				O61891	1		O02641		Q27515	1		1
cel:CELE	B0222.6	up:Q17458	Q17458	equivalent					0	0	0				0				O62112	1		O16230		Q27519	1		1
cel:CELE	B0222.7	up:Q17459	Q17459	equivalent					0	0	0				0				O62243	1		O16235		Q2MGE7	1		1
cel:CELE	B0222.8	up:Q17460	Q17460	equivalent					0	0	0				0				O62492	1		O16236		Q2PJA9	1		1
cel:CELE	B0222.9	up:Q960A1	Q960A1	equivalent					0	0	0				0				O62498	1		O16237		Q2V4T5	1		1
cel:CELE	B0228.1	up:Q09220	Q09220	equivalent					0	0	0				0				P17512	1		O16246		Q3S1L2	1		1
cel:CELE	B0228.4	up:Q09221	Q09221	equivalent					0	0	0				0				P18947	1		O16268		Q3V5K4	1		1
cel:CELE	B0228.5	up:Q09433	Q09433	equivalent					0	0	0				0				P34293	1		O16273		Q4R133	1		1
cel:CELE	B0228.6	up:Q09223	Q09223	equivalent					0	0	0				0				P34345	1		O16281		Q4R148	1		1
cel:CELE	B0228.7	up:Q09438	Q09438	equivalent					0	0	0				0				P34712	1		O16289		Q4R162	1		1
cel:CELE	B0228.8	up:Q09224	Q09224	equivalent					0	0	0				0				P54145	1		O16316		Q4R164	1		1
cel:CELE	B0228.9	up:Q09439	Q09439	equivalent					0	0	0				0				P55155	1		O16327		Q4TTB5	1		1
cel:CELE	B0238.1	up:O16497	O16497	equivalent					0	0	0				0				P91039	1		O16336		Q56VZ3	1		1
cel:CELE	B0238.10	up:O16486	O16486	equivalent					0	0	0				0				P91362	1		O16339		Q5DTE7	1		1
cel:CELE	B0238.11	up:O16487	O16487	equivalent					0	0	0				0				P91369	1		O16354		Q6LCK7	1		1
cel:CELE	B0238.12	up:O16488	O16488	equivalent					0	0	0				0				Q07085	1		O16383		Q7K6I8	1		1
cel:CELE	B0238.15	up:Q4R143	Q4R143	equivalent					0	0	0				0				Q09486	1		O16389		Q7KPV8	1		1
cel:CELE	B0238.3	up:O16494	O16494	equivalent					0	0	0				0				Q0MQ67	1		O16405		Q7YTH4	1		1
cel:CELE	B0238.5	up:O16492	O16492	equivalent					0	0	0				0				Q17658	1		O16408		Q7YTM1	1		1
cel:CELE	B0238.6	up:O16491	O16491	equivalent					0	0	0				0				Q17704	1		O16412		Q7YTQ1	1		1
cel:CELE	B0238.7	up:O16490	O16490	equivalent					0	0	0				0				Q17724	1		O16425		Q7YWN0	1		1
cel:CELE	B0238.8	up:O16489	O16489	equivalent					0	0	0				0				Q17726	1		O16442		Q7YX37	1		1
cel:CELE	B0238.9	up:O16485	O16485	equivalent					0	0	0				0				Q17738	1		O16453		Q7YX60	1		1
cel:CELE	B0240.1	up:Q17463	Q17463	equivalent					0	0	0				0				Q17938	1		O16547		Q7YX80	1		1
cel:CELE	B0240.2	up:Q17461	Q17461	equivalent					0	0	0				0				Q18492	1		O16586		Q7YXB0	1		1
cel:CELE	B0240.3	up:Q8I4N4	Q8I4N4	equivalent					0	0	0				0				Q18927	1		O16631		Q86D02	1		1
cel:CELE	B0240.4	up:Q8I4N3	Q8I4N3	equivalent					0	0	0				0				Q19035	1		O16676		Q86S58	1		1
cel:CELE	B0244.10	up:Q960A0	Q960A0	equivalent					0	0	0				0				Q19036	1		O16698		Q8WQG3	1		1
cel:CELE	B0244.11	up:Q95ZZ9	Q95ZZ9	equivalent					0	0	0				0				Q19111	1		O16753		Q8WTM3	1		1
cel:CELE	B0244.15	up:G4RRB3	G4RRB3	equivalent					0	0	0				0				Q19590	1		O16774		Q93149	1		1
cel:CELE	B0244.2	up:G5EGJ5	G5EGJ5	equivalent					0	0	0				0				Q19649	1		O16913		Q93553	1		1
cel:CELE	B0244.4	up:G4RRB5	G4RRB5	equivalent					0	0	0				0				Q19734	1		O16914		Q93560	1		1
cel:CELE	B0244.5	up:Q10909	Q10909	equivalent					1	0	0	Q10909			1				Q1EPL7	1		O16915		Q93698	1		1
cel:CELE	B0244.6	up:Q09965	Q09965	equivalent					0	0	0				0				Q20106	1		O16917		Q94255	1		1
cel:CELE	B0244.7	up:Q09966	Q09966	equivalent					0	0	0				0				Q20506	1		O16922		Q94260	1		1
cel:CELE	B0244.8	up:Q09967	Q09967	equivalent					0	0	0				0				Q20603	1		O16945		Q94271	1		1
cel:CELE	B0244.9	up:Q09968	Q09968	equivalent					0	0	0				0				Q20615	1		O16956		Q94282	1		1
cel:CELE	B0250.1	up:Q9XVF7	Q9XVF7	equivalent					0	0	0				0				Q20968	1		O16963		Q95XI1	1		1
cel:CELE	B0250.10	up:Q6BER8	Q6BER8	equivalent					0	0	0				0				Q21211	1		O16965		Q95XK8	1		1
cel:CELE	B0250.18	up:G1K0Y8	G1K0Y8	equivalent					0	0	0				0				Q21545	1		O16966		Q95XV0	1		1
cel:CELE	B0250.2	up:Q9XVF6	Q9XVF6	equivalent					0	0	0				0				Q21700	1		O16971		Q95Y21	1		1
cel:CELE	B0250.5	up:Q9XTI0	Q9XTI0	equivalent					0	0	0				0				Q22034	1		O16978		Q95YC3	1		1
cel:CELE	B0250.6	up:Q9XVF5	Q9XVF5	equivalent					0	0	0				0				Q22176	1		O17021		Q965N9	1		1
cel:CELE	B0250.7	up:H2L2H0	H2L2H0	equivalent					0	0	0				0				Q22260	1		O17024		Q965W4	1		1
cel:CELE	B0250.8	up:Q9XVF3	Q9XVF3	equivalent					0	0	0				0				Q22337	1		O17031		Q965X5	1		1
cel:CELE	B0250.9	up:G5ED82	G5ED82	equivalent					0	0	0				0				Q22738	1		O17038		Q966B7	1		1
cel:CELE	B0252.1	up:Q10915	Q10915	equivalent					1	0	1	Q10915		Q10915	2				Q22835	1		O17054		Q966B8	1		1
cel:CELE	B0252.2	up:Q10916	Q10916	equivalent					0	0	0				0				Q22966	1		O17067		Q967F0	1		1
cel:CELE	B0252.3	up:Q10917	Q10917	equivalent					0	0	0				0				Q22977	1		O17082		Q9BPM4	1		1
cel:CELE	B0252.4	up:P52017	P52017	equivalent					0	0	0				0				Q23068	1		O17101		Q9GYR7	1		1
cel:CELE	B0252.5	up:Q10918	Q10918	equivalent					0	0	0				0				Q23091	1		O17154		Q9GZD1	1		1
cel:CELE	B0252.8	up:Q45EL2	Q45EL2	equivalent					0	0	0				0				Q23199	1		O17168		Q9GZD2	1		1
cel:CELE	B0261.1	up:O01441	O01441	equivalent					0	0	0				0				Q23455	1		O17196		Q9N4P0	1		1
cel:CELE	B0261.2	up:Q95Q95	Q95Q95	equivalent					0	0	0				0				Q23564	1		O17198		Q9N4Y2	1		1
cel:CELE	B0261.4	up:Q2L6V2	Q2L6V2	equivalent					0	0	0				0				Q27471	1		O17209		Q9N5F6	1		1
cel:CELE	B0261.5	up:O01439	O01439	equivalent					0	0	0				0				Q27505	1		O17263		Q9N5G2	1		1
cel:CELE	B0261.6	up:O01440	O01440	equivalent					0	0	0				0				Q27506	1		O17304		Q9N5G4	1		1
cel:CELE	B0261.7	up:O01442	O01442	equivalent					0	0	0				0				Q27507	1		O17352		Q9N5I1	1		1
cel:CELE	B0261.8	up:Q7Z116	Q7Z116	equivalent					0	0	0				0				Q2MGE7	1		O17408		Q9NA96	1		1
cel:CELE	B0261.9	up:D5MCP2	D5MCP2	equivalent					0	0	0				0				Q2PJA9	1		O17526		Q9NA97	1		1
cel:CELE	B0272.1	up:P41937	P41937	equivalent					0	0	0				0				Q3S1L2	1		O17575		Q9NAA9	1		1
cel:CELE	B0272.2	up:P41941	P41941	equivalent					1	0	0	P41941			1				Q3V5K4	1		O17577		Q9NAC6	1		1
cel:CELE	B0272.3	up:P41938	P41938	equivalent					0	0	0				0				Q4R133	1		O17578		Q9TXW7	1		1
cel:CELE	B0272.4	up:P41942	P41942	equivalent					0	0	0				0				Q4R148	1		O17605		Q9TXX0	1		1
cel:CELE	B0273.1	up:O44170	O44170	equivalent					0	0	0				0				Q4R164	1		O17642		Q9TXZ3	1		1
cel:CELE	B0273.115	up:F3NWW6	F3NWW6	equivalent					0	0	0				0				Q56VZ3	1		O17679		Q9TXZ4	1		1
cel:CELE	B0273.2	up:O44169	O44169	equivalent					0	0	0				0				Q5DTE7	1		O17697		Q9TXZ6	1		1
cel:CELE	B0273.3	up:O44168	O44168	equivalent					0	0	0				0				Q7K6I8	1		O17707		Q9TYY4	1		1
cel:CELE	B0273.4	up:V6CK86	V6CK86	equivalent					0	0	0				0				Q7YTH4	1		O17710		Q9TYY5	1		1
cel:CELE	B0280.1	up:P41992	P41992	equivalent					0	0	0				0				Q7YTQ1	1		O17757		Q9TZ62	1		1
cel:CELE	B0280.10	up:P42001	P42001	equivalent					0	0	0				0				Q7YWN0	1		O17768		Q9U256	1		1
cel:CELE	B0280.11	up:P42083	P42083	equivalent					0	0	0				0				Q7YX37	1		O17830		Q9U2E4	1		1
cel:CELE	B0280.12	up:Q10914	Q10914	equivalent					0	0	0				0				Q7YX80	1		O17851		Q9U3D0	1		1
cel:CELE	B0280.13	up:Q5WRU4	Q5WRU4	equivalent					1	0	0	Q5WRU4			1				Q7YXB0	1		O17857		Q9U3Q6	1		1
cel:CELE	B0280.17	up:Q2V4X2	Q2V4X2	equivalent					0	0	0				0				Q86D02	1		O17860		Q9UAT1	1		1
cel:CELE	B0280.2	up:P41993	P41993	equivalent					0	0	0				0				Q86S58	1		O17862		Q9UAZ5	1		1
cel:CELE	B0280.3	up:P41994	P41994	equivalent					0	0	0				0				Q8WQG3	1		O17892		Q9XU18	1		1
cel:CELE	B0280.4	up:P41995	P41995	equivalent					1	0	0	P41995			1				Q93149	1		O17898		Q9XU43	1		1
cel:CELE	B0280.5	up:P41996	P41996	equivalent					0	0	0				0				Q93553	1		O17934		Q9XU55	1		1
cel:CELE	B0280.7	up:P41998	P41998	equivalent					0	0	0				0				Q93560	1		O17945		Q9XUH3	1		1
cel:CELE	B0280.8	up:P41999	P41999	equivalent					1	0	0	P41999			1				Q94255	1		O17949		Q9XUH7	1		1
cel:CELE	B0280.9	up:P42000	P42000	equivalent					0	0	0				0				Q94260	1		O17956		Q9XUH8	1		1
cel:CELE	B0281.1	up:O16617	O16617	equivalent					0	0	0				0				Q94282	1		O18030		Q9XUR6	1		1
cel:CELE	B0281.3	up:O16614	O16614	equivalent					0	0	0				0				Q95XI1	1		O18039		Q9XUT8	1		1
cel:CELE	B0281.4	up:O16611	O16611	equivalent					0	0	0				0				Q95XV0	1		O18154		Q9XUX6	1		1
cel:CELE	B0281.5	up:H2KY83	H2KY83	equivalent					0	0	0				0				Q95Y21	1		O18202		Q9XV91	1		1
cel:CELE	B0281.6	up:O16613	O16613	equivalent					0	0	0				0				Q95YC3	1		O18207		Q9XVB0	1		1
cel:CELE	B0281.8	up:O16616	O16616	equivalent					0	0	0				0				Q965N9	1		O18244		Q9XVB4	1		1
cel:CELE	B0284.1	up:Q17466	Q17466	equivalent					1	0	0	Q17466			1				Q965X5	1		O18251		Q9XVI7	1		1
cel:CELE	B0284.2	up:Q17469	Q17469	equivalent					1	0	0	Q17469			1				Q967F0	1		O18259		Q9XWC1	1		1
cel:CELE	B0284.3	up:Q17467	Q17467	equivalent					0	0	0				0				Q9BPM4	1		O44151		Q9XX08	1		1
cel:CELE	B0284.4	up:Q17468	Q17468	equivalent					0	0	0				0				Q9GZD1	1		O44174		Q9XX44	1		1
cel:CELE	B0285.1	up:P46551	P46551	equivalent					0	0	0				0				Q9GZD2	1		O44195		Q9XXH0	1		1
cel:CELE	B0285.10	up:P46560	P46560	equivalent					0	0	0				0				Q9N4Y2	1		O44471			1
cel:CELE	B0285.3	up:P46553	P46553	equivalent					0	0	0				0				Q9N5F6	1		O44491			1
cel:CELE	B0285.4	up:P46554	P46554	equivalent					0	0	0				0				Q9N5G2	1		O44495			1
cel:CELE	B0285.5	up:P46555	P46555	equivalent					0	0	0				0				Q9N5I1	1		O44504			1
cel:CELE	B0285.6	up:P46556	P46556	equivalent					0	0	0				0				Q9NA96	1		O44508			1
cel:CELE	B0285.7	up:P46557	P46557	equivalent					0	0	0				0				Q9NAA9	1		O44543			1
cel:CELE	B0285.8	up:P46558	P46558	equivalent					0	0	0				0				Q9NAC6	1		O44584			1
cel:CELE	B0285.9	up:P46559	P46559	equivalent					0	0	0				0				Q9TXW7	1		O44590			1
cel:CELE	B0286.1	up:Q10921	Q10921	equivalent					0	0	0				0				Q9TXX0	1		O44594			1
cel:CELE	B0286.2	up:G5ECX0	G5ECX0	equivalent					0	0	0				0				Q9TXZ3	1		O44616			1
cel:CELE	B0286.3	up:Q10457	Q10457	equivalent					1	0	0	Q10457			1				Q9TZ62	1		O44650			1
cel:CELE	B0286.4	up:Q10923	Q10923	equivalent					0	0	0				0				Q9U256	1		O44662			1
cel:CELE	B0286.5	up:Q10924	Q10924	equivalent					0	0	0				0				Q9U3D0	1		O44664			1
cel:CELE	B0286.6	up:Q6AHP9	Q6AHP9	equivalent					1	0	0	Q6AHP9			1				Q9UAZ5	1		O44665			1
cel:CELE	B0294.1	up:Q9TXP8	Q9TXP8	equivalent					0	0	0				0				Q9XU18	1		O44667			1
cel:CELE	B0294.3	up:Q9TXQ0	Q9TXQ0	equivalent					0	0	0				0				Q9XU43	1		O44692			1
cel:CELE	B0302.1	up:Q10925	Q10925	equivalent					0	0	0				0				Q9XUR6	1		O44705			1
cel:CELE	B0302.2	up:Q10926	Q10926	equivalent					0	0	0				0				Q9XUT8	1		O44706			1
cel:CELE	B0302.4	up:Q10927	Q10927	equivalent					0	0	0				0				Q9XUX6	1		O44747			1
cel:CELE	B0302.5	up:Q10906	Q10906	equivalent					0	0	0				0				Q9XVI7	1		O44771			1
cel:CELE	B0302.5	up:Q10928	Q10928	equivalent					0	0	0				0				Q9XWC1	1		O44799			1
cel:CELE	B0303.11	up:A0A0K3AU37	A0A0K3AU37	equivalent					0	0	0				0			A3FPK5		1		O44921			1
cel:CELE	B0303.14	up:P34263	P34263	equivalent					0	0	0				0			A5Z2U7		1		O44923			1
cel:CELE	B0303.15	up:P34264	P34264	equivalent					1	0	0	P34264			1			A7LPJ2		1		O44975			1
cel:CELE	B0303.16	up:Q2V4X6	Q2V4X6	equivalent					0	0	0				0			G5EFT9		1		O45003			1
cel:CELE	B0303.2	up:P34254	P34254	equivalent					0	0	0				0			O02621		1		O45058			1
cel:CELE	B0303.3	up:P34255	P34255	equivalent					0	0	0				0			O16214		1		O45083			1
cel:CELE	B0303.4	up:P34256	P34256	equivalent					0	0	0				0			O44507		1		O45102			1
cel:CELE	B0303.7	up:P34258	P34258	equivalent					0	0	0				0			O46024		1		O45144			1
cel:CELE	B0303.8	up:P34259	P34259	equivalent					0	0	0				0			O61235		1		O45189			1
cel:CELE	B0303.9	up:P34260	P34260	equivalent					0	0	0				0			O61874		1		O45227			1
cel:CELE	B0304.1	up:P22980	P22980	equivalent					0	0	0				0			Q18903		1		O45311			1
cel:CELE	B0304.2	up:Q10932	Q10932	equivalent					0	0	0				0			Q18986		1		O45316			1
cel:CELE	B0304.3	up:Q27465	Q27465	equivalent					0	0	0				0			Q20046		1		O45323			1
cel:CELE	B0304.4	up:Q10933	Q10933	equivalent					0	0	0				0			Q20840		1		O45346			1
cel:CELE	B0304.5	up:Q10934	Q10934	equivalent					0	0	0				0			Q21528		1		O45353			1
cel:CELE	B0304.6	up:Q10935	Q10935	equivalent					0	0	0				0			Q22156		1		O45364			1
cel:CELE	B0304.7	up:Q10936	Q10936	equivalent					1	0	0	Q10936			1			Q22814		1		O45394			1
cel:CELE	B0304.8	up:Q7YZG0	Q7YZG0	equivalent					0	0	0				0			Q23683		1		O45423			1
cel:CELE	B0304.9	up:Q3Y412	Q3Y412	equivalent					0	0	0				0			Q27470		1		O45426			1
cel:CELE	B0310.1	up:Q10937	Q10937	equivalent					0	0	0				0			Q27514		1		O45428			1
cel:CELE	B0310.2	up:Q10938	Q10938	equivalent					0	0	0				0			Q4R138		1		O45442			1
cel:CELE	B0310.3	up:Q10939	Q10939	equivalent					1	0	0	Q10939			1			Q7YTR9		1		O45496			1
cel:CELE	B0310.5	up:Q10941	Q10941	equivalent					0	0	0				0			Q8MYL7		1		O45508			1
cel:CELE	B0310.6	up:Q10942	Q10942	equivalent					0	0	0				0			Q95YE0		1		O45518			1
cel:CELE	B0331.1	up:O45219	O45219	equivalent					0	0	0				0			Q9N5C0		1		O45531			1
cel:CELE	B0331.2	up:O45220	O45220	equivalent					0	0	1			O45220	1			Q9U1Q8		1		O45535			1
cel:CELE	B0334.1	up:Q17473	Q17473	equivalent					0	0	0				0			Q9XXD0		1		O45596			1
cel:CELE	B0334.10	up:Q9XVW7	Q9XVW7	equivalent					0	0	0				0		A0A061AE68			1		O45601			1
cel:CELE	B0334.11	up:Q8I132	Q8I132	equivalent					0	0	0				0		A0A078BPH9			1		O45687			1
cel:CELE	B0334.13	up:Q7YTS6	Q7YTS6	equivalent					0	0	0				0		A0A078BS54			1		O45700			1
cel:CELE	B0334.15	up:E1B6R8	E1B6R8	equivalent					0	0	0				0		A0A0H3W5N0			1		O45710			1
cel:CELE	B0334.2	up:Q5FC72	Q5FC72	equivalent					0	0	0				0		A0A0K2WPR7			1		O45730			1
cel:CELE	B0334.20	up:H2L278	H2L278	equivalent					0	0	0				0		A0A0K3AQN5			1		O45740			1
cel:CELE	B0334.3	up:Q17474	Q17474	equivalent					0	0	0				0		A0A0K3ARN3			1		O45752			1
cel:CELE	B0334.4	up:Q17476	Q17476	equivalent					0	0	0				0		A0A0K3ASA3			1		O45779			1
cel:CELE	B0334.5	up:Q17477	Q17477	equivalent					0	0	0				0		A0A0K3ASI8			1		O45792			1
cel:CELE	B0334.6	up:Q17478	Q17478	equivalent					0	0	0				0		A0A0K3ASR1			1		O45806			1
cel:CELE	B0334.7	up:Q17479	Q17479	equivalent					0	0	0				0		A0A0K3AUF6			1		O45813			1
cel:CELE	B0334.8	up:Q94125	Q94125	equivalent					0	0	0				0		A0A0K3AWM6			1		O45822			1
cel:CELE	B0336.1	up:Q10953	Q10953	equivalent					0	0	0				0		A0A0K3AXG8			1		O45830			1
cel:CELE	B0336.10	up:P48158	P48158	equivalent					0	0	0				0		A0A0S4XR75			1		O45838			1
cel:CELE	B0336.11	up:Q10956	Q10956	equivalent					0	0	0				0		A0FLQ5			1		O45891			1
cel:CELE	B0336.12	up:Q10957	Q10957	equivalent					0	0	0				0		A0PCJ1			1		O45969			1
cel:CELE	B0336.13	up:Q9BIB4	Q9BIB4	equivalent					0	0	0				0		A1IMB7			1		O61203			1
cel:CELE	B0336.2	up:Q10943	Q10943	equivalent					0	0	0				0		A1Z6D0			1		O61209			1
cel:CELE	B0336.3	up:Q10954	Q10954	equivalent					0	0	0				0		A3FPI7			1		O61218			1
cel:CELE	B0336.4	up:Q10955	Q10955	equivalent					0	0	0				0		A3FPJ0			1		O61736			1
cel:CELE	B0336.5	up:H2KY75	H2KY75	equivalent					0	0	0				0		A3FPJ3			1		O61738			1
cel:CELE	B0336.6	up:Q10929	Q10929	equivalent					0	0	0				0		A3FPJ4			1		O61781			1
cel:CELE	B0336.7	up:H2KY76	H2KY76	equivalent					0	0	0				0		A3FPL3			1		O61782			1
cel:CELE	B0336.8	up:Q10931	Q10931	equivalent					0	0	0				0		A3KFD8			1		O61790			1
cel:CELE	B0336.9	up:Q8MPQ0	Q8MPQ0	equivalent					0	0	0				0		A3QM98			1		O61794			1
cel:CELE	B0344.2	up:O61737	O61737	equivalent					0	0	0				0		A4F314			1		O61795			1
cel:CELE	B0348.1	up:O61959	O61959	equivalent					0	0	0				0		A4F333			1		O61799			1
cel:CELE	B0348.10	up:A0A0K3ARQ1	A0A0K3ARQ1	equivalent					0	0	0				0		A4UVK9			1		O61801			1
cel:CELE	B0348.2	up:O61958	O61958	equivalent					1	0	1	O61958		O61958	2		A4V4W1			1		O61803			1
cel:CELE	B0348.4	up:A0A0K3AXH8	A0A0K3AXH8	equivalent					0	0	0				0		A5JYW3			1		O61816			1
cel:CELE	B0348.5	up:A0A0K3AV61	A0A0K3AV61	equivalent					0	0	0				0		A5JYW4			1		O61834			1
cel:CELE	B0348.6	up:O61955	O61955	equivalent					0	0	0				0		A5PEW9			1		O61844			1
cel:CELE	B0350.2	up:Q17490	Q17490	equivalent					0	0	0				0		A5PEX3			1		O61854			1
cel:CELE	B0353.1	up:A8WFH0	A8WFH0	equivalent					0	0	0				0		A6ZJ72			1		O61857			1
cel:CELE	B0361.10	up:Q9TXZ9	Q9TXZ9	equivalent					0	0	0				0		A7LPC7			1		O61865			1
cel:CELE	B0361.11	up:Q7Z118	Q7Z118	equivalent					0	0	0				0		A7LPH9			1		O61869			1
cel:CELE	B0361.2	up:Q10946	Q10946	equivalent					0	0	0				0		A7LPI3			1		O61919			1
cel:CELE	B0361.3	up:Q7JPQ6	Q7JPQ6	equivalent					0	0	0				0		A8DZ49			1		O61929			1
cel:CELE	B0361.4	up:Q10948	Q10948	equivalent					0	0	0				0		A8WFH1			1		O61958			1
cel:CELE	B0361.5	up:Q10949	Q10949	equivalent					0	0	0				0		A8WFN8			1		O62034			1
cel:CELE	B0361.6	up:Q10950	Q10950	equivalent					0	0	0				0		A8WI70			1		O62073			1
cel:CELE	B0361.7	up:Q10944	Q10944	equivalent					0	0	0				0		A8WJ47			1		O62075			1
cel:CELE	B0361.8	up:P53993	P53993	equivalent					0	0	0				0		A8WJ48			1		O62076			1
cel:CELE	B0361.9	up:Q10952	Q10952	equivalent					0	0	0				0		A9Z1K7			1		O62077			1
cel:CELE	B0365.1	up:P90731	P90731	equivalent					0	0	0				0		B2MZA5			1		O62078			1
cel:CELE	B0365.3	up:P90735	P90735	equivalent					0	0	0				0		B3WFT6			1		O62085			1
cel:CELE	B0365.5	up:G3MU44	G3MU44	equivalent					0	0	0				0		B3WFU6			1		O62091			1
cel:CELE	B0365.6	up:P90732	P90732	equivalent					0	0	0				0		B3WFV1			1		O62092			1
cel:CELE	B0365.7	up:G5EDV4	G5EDV4	equivalent					0	0	0				0		B3WFZ3			1		O62093			1
cel:CELE	B0365.9	up:Q52GY3	Q52GY3	equivalent					0	0	0				0		B5U8N4			1		O62103			1
cel:CELE	B0379.1	up:Q9XU45	Q9XU45	equivalent					0	0	0				0		B5U8N9			1		O62122			1
cel:CELE	B0379.2	up:O02203	O02203	equivalent					0	0	0				0		B9WRT9			1		O62133			1
cel:CELE	B0379.3	up:O62011	O62011	equivalent					0	0	0				0		C1P623			1		O62142			1
cel:CELE	B0379.4	up:Q8T3G3	Q8T3G3	equivalent					0	0	0				0		C7FZV0			1		O62149			1
cel:CELE	B0379.6	up:O45221	O45221	equivalent					0	0	0				0		C7IVQ8			1		O62239			1
cel:CELE	B0379.7	up:Q9U3S6	Q9U3S6	equivalent					0	0	0				0		C7IVR7			1		O62247			1
cel:CELE	B0391.11	up:Q9NDU9	Q9NDU9	equivalent					0	0	0				0		C8JQS8			1		O62271			1
cel:CELE	B0391.12	up:Q86D26	Q86D26	equivalent					0	0	0				0		D2N113			1		O62281			1
cel:CELE	B0391.14	up:F5GUF2	F5GUF2	equivalent					0	0	0				0		D2YW03			1		O62309			1
cel:CELE	B0391.3	up:O62016	O62016	equivalent					0	0	0				0		D3KFU5			1		O62317			1
cel:CELE	B0391.4	up:O62017	O62017	equivalent					0	0	0				0		D7SFJ0			1		O62324			1
cel:CELE	B0391.5	up:O62012	O62012	equivalent					0	0	0				0		F3Y5Q1			1		O62334			1
cel:CELE	B0391.6	up:Q86D19	Q86D19	equivalent					0	0	0				0		F5GUE5			1		O62377			1
cel:CELE	B0391.9	up:O62014	O62014	equivalent					0	0	0				0		G3MTY1			1		O62378			1
cel:CELE	B0393.1	up:P46769	P46769	equivalent					0	0	0				0		G3MU02			1		O62385			1
cel:CELE	B0393.2	up:Q17491	Q17491	equivalent					0	0	0				0		G3MU36			1		O62416			1
cel:CELE	B0393.3	up:Q17492	Q17492	equivalent					0	0	0				0		G4S428			1		O62452			1
cel:CELE	B0393.4	up:Q17493	Q17493	equivalent					0	0	0				0		G4SF79			1		O62476			1
cel:CELE	B0393.5	up:Q17494	Q17494	equivalent					0	0	0				0		G5EBG4			1		O62511			1
cel:CELE	B0393.6	up:Q17495	Q17495	equivalent					0	0	0				0		G5EBK1			1		O76357			1
cel:CELE	B0393.7	up:Q17496	Q17496	equivalent					0	0	0				0		G5EBP0			1		O76358			1
cel:CELE	B0393.8	up:G5ED48	G5ED48	equivalent					0	0	0				0		G5EBR4			1		O76410			1
cel:CELE	B0393.9	up:A7LPF5	A7LPF5	equivalent					0	0	0				0		G5EBR9			1		O76600			1
cel:CELE	B0395.1	up:G5EDH8	G5EDH8	equivalent					0	0	0				0		G5EC14			1		O76610			1
cel:CELE	B0395.2	up:Q17498	Q17498	equivalent					0	0	0				0		G5EC41			1		O76635			1
cel:CELE	B0395.3	up:Q17499	Q17499	equivalent					0	0	0				0		G5EC68			1		O76670			1
cel:CELE	B0399.1	up:G5EFI1	G5EFI1	equivalent					0	0	0				0		G5EC84			1		O76694			1
cel:CELE	B0399.2	up:G5EC12	G5EC12	equivalent					0	0	0				0		G5ECG9			1		O76725			1
cel:CELE	B0403.2	up:Q11076	Q11076	equivalent					0	0	0				0		G5ECJ2			1		P08124			1
cel:CELE	B0403.3	up:Q11077	Q11077	equivalent					0	0	0				0		G5ECP4			1		P08898			1
cel:CELE	B0403.4	up:Q11067	Q11067	equivalent					0	0	0				0		G5ECR6			1		P10038			1
cel:CELE	B0403.5	up:Q6LCP9	Q6LCP9	equivalent					0	0	0				0		G5ECT2			1		P10771			1
cel:CELE	B0403.6	up:Q5WRT2	Q5WRT2	equivalent					0	0	0				0		G5ED14			1		P14585			1
cel:CELE	B0410.1	up:Q17501	Q17501	equivalent					0	0	0				0		G5ED43			1		P17488			1
cel:CELE	B0410.2	up:H2KY90	H2KY90	equivalent					0	0	0				0		G5ED56			1		P17657			1
cel:CELE	B0410.3	up:Q95ZZ5	Q95ZZ5	equivalent					0	0	0				0		G5ED56			1		P18835			1
cel:CELE	B0412.1	up:H2KY91	H2KY91	equivalent					0	0	0				0		G5ED64			1		P20784			1
cel:CELE	B0412.2	up:P92172	P92172	equivalent					0	0	0				0		G5ED91			1		P21541			1
cel:CELE	B0412.4	up:P90983	P90983	equivalent					0	0	0				0		G5EDJ4			1		P25807			1
cel:CELE	B0414.1	up:O01838	O01838	equivalent					0	0	0				0		G5EDK7			1		P30646			1
cel:CELE	B0414.2	up:G5EFQ5	G5EFQ5	equivalent					0	0	0				0		G5EDK7			1		P34264			1
cel:CELE	B0414.3	up:O01833	O01833	equivalent					0	0	0				0		G5EDL5			1		P34269			1
cel:CELE	B0414.5	up:O01835	O01835	equivalent					0	0	0				0		G5EDM5			1		P34272			1
cel:CELE	B0414.6	up:O01836	O01836	equivalent					0	0	0				0		G5EDP2			1		P34289			1
cel:CELE	B0414.7	up:O01837	O01837	equivalent					0	0	0				0		G5EE21			1		P34320			1
cel:CELE	B0414.8	up:O01839	O01839	equivalent					0	0	0				0		G5EEA2			1		P34348			1
cel:CELE	B0416.1	up:Q11069	Q11069	equivalent					0	0	0				0		G5EEA5			1		P34370			1
cel:CELE	B0416.10	up:G1K0U6	G1K0U6	equivalent					0	0	0				0		G5EEC6			1		P34390			1
cel:CELE	B0416.11	up:G1K0U7	G1K0U7	equivalent					0	0	0				0		G5EED4			1		P34407			1
cel:CELE	B0416.2	up:Q11070	Q11070	equivalent					0	0	0				0		G5EEE7			1		P34412			1
cel:CELE	B0416.3	up:Q11071	Q11071	equivalent					0	0	0				0		G5EEE9			1		P34427			1
cel:CELE	B0416.4	up:Q11072	Q11072	equivalent					0	0	0				0		G5EEI1			1		P34434			1
cel:CELE	B0416.5	up:G8JXY9	G8JXY9	equivalent					0	0	0				0		G5EEK1			1		P34456			1
cel:CELE	B0416.6	up:Q11068	Q11068	equivalent					0	0	0				0		G5EEQ1			1		P34483			1
cel:CELE	B0416.7	up:Q11074	Q11074	equivalent					0	0	0				0		G5EEQ2			1		P34495			1
cel:CELE	B0432.1	up:P90997	P90997	equivalent					0	0	0				0		G5EEU2			1		P34618			1
cel:CELE	B0432.10	up:P90991	P90991	equivalent					0	0	0				0		G5EEV9			1		P34650			1
cel:CELE	B0432.11	up:P90995	P90995	equivalent					0	0	0				0		G5EEX4			1		P34713			1
cel:CELE	B0432.12	up:P90996	P90996	equivalent					0	0	0				0		G5EF35			1		P35799			1
cel:CELE	B0432.13	up:P90990	P90990	equivalent					0	0	0				0		G5EF53			1		P41829			1
cel:CELE	B0432.14	up:Q3HKB5	Q3HKB5	equivalent					0	0	0				0		G5EFA9			1		P41881			1
cel:CELE	B0432.2	up:P90994	P90994	equivalent					0	0	0				0		G5EFG0			1		P41941			1
cel:CELE	B0432.3	up:P90993	P90993	equivalent					0	0	0				0		G5EFJ3			1		P41995			1
cel:CELE	B0432.4	up:P90992	P90992	equivalent					0	0	0				0		G5EFP4			1		P41999			1
cel:CELE	B0432.5	up:S6FN11	S6FN11	equivalent					0	0	0				0		G5EFT7			1		P42171			1
cel:CELE	B0432.7	up:A0A0K3AQW3	A0A0K3AQW3	equivalent					0	0	0				0		G5EFV1			1		P43507			1
cel:CELE	B0432.8	up:P90989	P90989	equivalent					0	0	0				0		G5EFZ2			1		P43508			1
cel:CELE	B0432.9	up:Q8WT45	Q8WT45	equivalent					0	0	0				0		G5EG20			1		P45896			1
cel:CELE	B0454.1	up:G5EDW7	G5EDW7	equivalent					0	0	0				0		G5EG36			1		P48996			1
cel:CELE	B0454.10	up:Q95X80	Q95X80	equivalent					0	0	0				0		G5EG39			1		P49713			1
cel:CELE	B0454.2	up:O17172	O17172	equivalent					0	0	0				0		G5EG82			1		P50438			1
cel:CELE	B0454.26	up:E6N0U7	E6N0U7	equivalent					0	0	0				0		G5EG82			1		P52014			1
cel:CELE	B0454.3	up:O17171	O17171	equivalent					0	0	0				0		G5EG90			1		P52716			1
cel:CELE	B0454.4	up:O17170	O17170	equivalent					0	0	0				0		G5EG92			1		P52880			1
cel:CELE	B0454.5	up:O17168	O17168	equivalent					1	0	0	O17168			1		G5EG96			1		P54126			1
cel:CELE	B0454.6	up:O17167	O17167	equivalent					0	0	0				0		G5EG98			1		P55113			1
cel:CELE	B0454.7	up:O17166	O17166	equivalent					0	1	1		O17166	O17166	2		G5EGH6			1		P90771			1
cel:CELE	B0454.8	up:O17169	O17169	equivalent					0	0	0				0		G5EGJ4			1		P90780			1
cel:CELE	B0454.9	up:O17173	O17173	equivalent					0	0	0				0		G5EGU4			1		P90832			1
cel:CELE	B0457.1	up:G5EDW2	G5EDW2	equivalent					0	0	0				0		G8JLY0			1		P90951			1
cel:CELE	B0457.2	up:G5EGF7	G5EGF7	equivalent					0	0	0				0		H2FLH0			1		P91043			1
cel:CELE	B0457.4	up:Q17502	Q17502	equivalent					0	0	0				0		H2FLI1			1		P91107			1
cel:CELE	B0457.6	up:Q7YX77	Q7YX77	equivalent					1	0	0	Q7YX77			1		H2KZA9			1		P91127			1
cel:CELE	B0462.3	up:O45224	O45224	equivalent					0	0	0				0		H2KZI0			1		P91160			1
cel:CELE	B0462.4	up:Q7YX99	Q7YX99	equivalent					0	0	0				0		H2L0G1			1		P91196			1
cel:CELE	B0462.5	up:C7FZU7	C7FZU7	equivalent					0	0	0				0		H9G2S4			1		P91204			1
cel:CELE	B0464.1	up:Q03577	Q03577	equivalent					0	0	0				0		H9G2W0			1		P91228			1
cel:CELE	B0464.2	up:Q03560	Q03560	equivalent					0	0	0				0		H9G2Z6			1		P91230			1
cel:CELE	B0464.3	up:Q03561	Q03561	equivalent					0	0	0				0		H9G342			1		P91249			1
cel:CELE	B0464.4	up:Q03562	Q03562	equivalent					0	0	0				0		J7SF87			1		P91253			1
cel:CELE	B0464.5	up:Q03563	Q03563	equivalent					0	0	0				0		K7ZUH9			1		P91274			1
cel:CELE	B0464.6	up:Q03564	Q03564	equivalent					0	0	0				0		K8ESM2			1		P91321			1
cel:CELE	B0464.7	up:Q03565	Q03565	equivalent					0	0	0				0		K8ESM7			1		P91370			1
cel:CELE	B0464.8	up:Q9XVX8	Q9XVX8	equivalent					0	0	0				0		K8FE10			1		P91442			1
cel:CELE	B0464.9	up:Q9BIB3	Q9BIB3	equivalent					0	0	0				0		L8E826			1		P91460			1
cel:CELE	B0478.1	up:Q8WQG9	Q8WQG9	equivalent					0	0	0				0		O01457			1		P91487			1
cel:CELE	B0478.3	up:Q17508	Q17508	equivalent					0	0	0				0		O01459			1		P91489			1
cel:CELE	B0491.1	up:Q17515	Q17515	equivalent					0	0	0				0		O01584			1		P91516			1
cel:CELE	B0491.2	up:P12114	P12114	equivalent					0	0	0				0		O01595			1		P91519			1
cel:CELE	B0491.3	up:Q17510	Q17510	equivalent					0	0	0				0		O01609			1		P91547			1
cel:CELE	B0491.4	up:Q17511	Q17511	equivalent					0	0	0				0		O01614			1		P91548			1
cel:CELE	B0491.5	up:Q17512	Q17512	equivalent					0	0	0				0		O01626			1		P91563			1
cel:CELE	B0491.6	up:Q17513	Q17513	equivalent					0	0	0				0		O01627			1		P91991			1
cel:CELE	B0491.7	up:Q17514	Q17514	equivalent					0	0	0				0		O01661			1		P92006			1
cel:CELE	B0491.8	up:G5EG93	G5EG93	equivalent					0	0	0				0		O01662			1		P92018			1
cel:CELE	B0495.1	up:Q09213	Q09213	equivalent					0	0	0				0		O01780			1		Q03566			1
cel:CELE	B0495.10	up:Q09219	Q09219	equivalent					0	0	0				0		O01847			1		Q03572			1
cel:CELE	B0495.2	up:Q09437	Q09437	equivalent					0	0	0				0		O01862			1		Q03599			1
cel:CELE	B0495.4	up:Q8T5S1	Q8T5S1	equivalent					0	0	0				0		O01865			1		Q03605			1
cel:CELE	B0495.5	up:Q09214	Q09214	equivalent					0	0	0				0		O01879			1		Q03615			1
cel:CELE	B0495.6	up:Q09215	Q09215	equivalent					0	0	0				0		O01887			1		Q067X2			1
cel:CELE	B0495.7	up:Q09216	Q09216	equivalent					0	0	0				0		O02040			1		Q09262			1
cel:CELE	B0495.8	up:Q09217	Q09217	equivalent					0	0	0				0		O02051			1		Q09266			1
cel:CELE	B0495.9	up:Q09218	Q09218	equivalent					0	0	0				0		O02098			1		Q09282			1
cel:CELE	B0496.1	up:Q17523	Q17523	equivalent					0	0	0				0		O02132			1		Q09311			1
cel:CELE	B0496.11	up:D1MN57	D1MN57	equivalent					0	0	0				0		O02145			1		Q09321			1
cel:CELE	B0496.2	up:Q17524	Q17524	equivalent					0	0	0				0		O02167			1		Q09341			1
cel:CELE	B0496.3	up:H2KYA5	H2KYA5	equivalent					0	0	0				0		O02236			1		Q09401			1
cel:CELE	B0496.5	up:Q17519	Q17519	equivalent					0	0	0				0		O02268			1		Q09455			1
cel:CELE	B0496.6	up:Q17518	Q17518	equivalent					0	0	0				0		O02303			1		Q09484			1
cel:CELE	B0496.7	up:Q17522	Q17522	equivalent					0	0	0				0		O02357			1		Q09492			1
cel:CELE	B0496.8	up:Q17525	Q17525	equivalent					0	0	0				0		O02641			1		Q09495			1
cel:CELE	B0507.1	up:Q22886	Q22886	equivalent					0	0	0				0		O16230			1		Q09528			1
cel:CELE	B0507.10	up:Q95Q93	Q95Q93	equivalent					0	0	0				0		O16235			1		Q09534			1
cel:CELE	B0507.11	up:Q7JNP8	Q7JNP8	equivalent					0	0	0				0		O16236			1		Q09551			1
cel:CELE	B0507.15	up:E3W721	E3W721	equivalent					0	0	0				0		O16237			1		Q09600			1
cel:CELE	B0507.2	up:Q22885	Q22885	equivalent					0	0	0				0		O16246			1		Q09626			1
cel:CELE	B0507.3	up:H2KYB0	H2KYB0	equivalent					0	0	0				0		O16268			1		Q09632			1
cel:CELE	B0507.4	up:Q22880	Q22880	equivalent					0	0	0				0		O16273			1		Q09635			1
cel:CELE	B0507.5	up:H2KYB1	H2KYB1	equivalent					0	0	0				0		O16281			1		Q09655			1
cel:CELE	B0507.6	up:E3W720	E3W720	equivalent					0	0	0				0		O16289			1		Q09663			1
cel:CELE	B0507.7	up:Q22881	Q22881	equivalent					0	0	0				0		O16316			1		Q09978			1
cel:CELE	B0507.8	up:Q22882	Q22882	equivalent					0	0	0				0		O16327			1		Q09EF0			1
cel:CELE	B0507.9	up:Q22883	Q22883	equivalent					0	0	0				0		O16336			1		Q0MQ65			1
cel:CELE	B0511.1	up:O61826	O61826	equivalent					0	0	0				0		O16339			1		Q10017			1
cel:CELE	B0511.10	up:O61820	O61820	equivalent					0	0	0				0		O16354			1		Q10018			1
cel:CELE	B0511.11	up:O61823	O61823	equivalent					0	0	0				0		O16383			1		Q10025			1
cel:CELE	B0511.12	up:O61825	O61825	equivalent					0	0	0				0		O16389			1		Q10028			1
cel:CELE	B0511.13	up:G8JXZ3	G8JXZ3	equivalent					0	0	0				0		O16405			1		Q10128			1
cel:CELE	B0511.17	up:G4RT17	G4RT17	equivalent					0	0	0				0		O16408			1		Q10131			1
cel:CELE	B0511.19	up:A0A0K3AU60	A0A0K3AU60	equivalent					0	0	0				0		O16412			1		Q10457			1
cel:CELE	B0511.2	up:O61824	O61824	equivalent					0	0	0				0		O16425			1		Q10909			1
cel:CELE	B0511.3	up:O61822	O61822	equivalent					0	0	0				0		O16442			1		Q10910			1
cel:CELE	B0511.4	up:O61821	O61821	equivalent					0	0	0				0		O16453			1		Q10915			1
cel:CELE	B0511.5	up:O61816	O61816	equivalent					1	0	0	O61816			1		O16547			1		Q10936			1
cel:CELE	B0511.6	up:O61815	O61815	equivalent					0	0	0				0		O16586			1		Q10939			1
cel:CELE	B0511.7	up:O61817	O61817	equivalent					0	0	0				0		O16631			1		Q11081			1
cel:CELE	B0511.8	up:O61818	O61818	equivalent					0	0	0				0		O16676			1		Q11087			1
cel:CELE	B0511.9	up:G4RT11	G4RT11	equivalent					0	0	0				0		O16698			1		Q11100			1
cel:CELE	B0513.1	up:O62020	O62020	equivalent					0	0	0				0		O16753			1		Q11177			1
cel:CELE	B0513.2	up:Q9U3S3	Q9U3S3	equivalent					0	0	0				0		O16774			1		Q11184			1
cel:CELE	B0513.3	up:O45226	O45226	equivalent					0	0	0				0		O16913			1		Q17334			1
cel:CELE	B0513.4	up:O45227	O45227	equivalent					1	0	0	O45227			1		O16915			1		Q17403			1
cel:CELE	B0513.5	up:O45228	O45228	equivalent					0	0	0				0		O16922			1		Q17404			1
cel:CELE	B0513.9	up:Q95QZ1	Q95QZ1	equivalent					0	0	0				0		O16956			1		Q17452			1
cel:CELE	B0513.90	up:U4PCG5	U4PCG5	equivalent					0	0	0				0		O16963			1		Q17454			1
cel:CELE	B0523.3	up:P34266	P34266	equivalent					0	0	0				0		O16965			1		Q17456			1
cel:CELE	B0523.5	up:P34268	P34268	equivalent					0	0	0				0		O16966			1		Q17466			1
cel:CELE	B0524.2	up:Q9N5Z7	Q9N5Z7	equivalent					0	0	0				0		O16971			1		Q17469			1
cel:CELE	B0524.3	up:Q9N5Z9	Q9N5Z9	equivalent					0	0	0				0		O16978			1		Q17538			1
cel:CELE	B0524.4	up:Q9N600	Q9N600	equivalent					0	0	0				0		O17021			1		Q17541			1
cel:CELE	B0524.5	up:Q9N5Z8	Q9N5Z8	equivalent					0	0	0				0		O17024			1		Q17549			1
cel:CELE	B0524.6	up:Q9N5Z6	Q9N5Z6	equivalent					0	0	0				0		O17031			1		Q17561			1
cel:CELE	B0545.1	up:P34722	P34722	equivalent					0	0	0				0		O17038			1		Q17589			1
cel:CELE	B0545.3	up:O76663	O76663	equivalent					0	0	0				0		O17054			1		Q17600			1
cel:CELE	B0545.4	up:O76665	O76665	equivalent					0	0	0				0		O17067			1		Q17649			1
cel:CELE	B0546.1	up:O44441	O44441	equivalent					0	0	0				0		O17101			1		Q17662			1
cel:CELE	B0546.2	up:O44438	O44438	equivalent					0	0	0				0		O17154			1		Q17663			1
cel:CELE	B0546.3	up:U4PBQ7	U4PBQ7	equivalent					0	0	0				0		O17168			1		Q17677			1
cel:CELE	B0546.4	up:O44440	O44440	equivalent					0	0	0				0		O17196			1		Q17746			1
cel:CELE	B0546.5	up:O44442	O44442	equivalent					0	0	0				0		O17198			1		Q17757			1
cel:CELE	B0547.1	up:P91001	P91001	equivalent					0	0	0				0		O17209			1		Q17772			1
cel:CELE	B0547.2	up:P91000	P91000	equivalent					0	0	0				0		O17304			1		Q17812			1
cel:CELE	B0547.4	up:P90999	P90999	equivalent					0	0	0				0		O17352			1		Q17837			1
cel:CELE	B0554.1	up:P91008	P91008	equivalent					0	0	0				0		O17408			1		Q17846			1
cel:CELE	B0554.2	up:P91006	P91006	equivalent					0	0	0				0		O17526			1		Q17847			1
cel:CELE	B0554.4	up:P91004	P91004	equivalent					0	0	0				0		O17575			1		Q17884			1
cel:CELE	B0554.5	up:P91003	P91003	equivalent					0	0	0				0		O17577			1		Q17903			1
cel:CELE	B0554.6	up:P91002	P91002	equivalent					0	0	0				0		O17578			1		Q17910			1
cel:CELE	B0554.7	up:A0A0K3ART0	A0A0K3ART0	equivalent					0	0	0				0		O17605			1		Q17975			1
cel:CELE	B0563.1	up:Q11078	Q11078	equivalent					0	0	0				0		O17642			1		Q17993			1
cel:CELE	B0563.10	up:B1Q234	B1Q234	equivalent					0	0	0				0		O17679			1		Q17996			1
cel:CELE	B0563.18	up:E5QCE2	E5QCE2	equivalent					0	0	0				0		O17697			1		Q18006			1
cel:CELE	B0563.2	up:Q17526	Q17526	equivalent					0	0	0				0		O17707			1		Q18014			1
cel:CELE	B0563.4	up:Q11080	Q11080	equivalent					0	0	0				0		O17710			1		Q18020			1
cel:CELE	B0563.5	up:Q11081	Q11081	equivalent					1	0	0	Q11081			1		O17768			1		Q18070			1
cel:CELE	B0563.6	up:A8WFI5	A8WFI5	equivalent					0	0	0				0		O17830			1		Q18130			1
cel:CELE	B0563.7	up:Q11083	Q11083	equivalent					0	0	0				0		O17851			1		Q18152			1
cel:CELE	B0563.8	up:Q11084	Q11084	equivalent					0	0	0				0		O17857			1		Q18153			1
cel:CELE	B0563.9	up:Q2PJA9	Q2PJA9	equivalent					0	0	1			Q2PJA9	1		O17862			1		Q18156			1
cel:CELE	B0564.10	up:P52906	P52906	equivalent					0	0	0				0		O17892			1		Q18199			1
cel:CELE	B0564.11	up:Q6BET5	Q6BET5	equivalent					0	0	0				0		O17898			1		Q18200			1
cel:CELE	B0564.2	up:Q17527	Q17527	equivalent					0	0	0				0		O17934			1		Q18253			1
cel:CELE	B0564.3	up:Q17528	Q17528	equivalent					0	0	0				0		O17949			1		Q18256			1
cel:CELE	B0564.4	up:Q17529	Q17529	equivalent					0	0	0				0		O17956			1		Q18299			1
cel:CELE	B0564.6	up:Q17531	Q17531	equivalent					0	0	0				0		O18154			1		Q18335			1
cel:CELE	B0564.7	up:Q17532	Q17532	equivalent					0	0	0				0		O18202			1		Q18345			1
cel:CELE	B0564.9	up:Q17531	Q17531	equivalent					0	0	0				0		O18207			1		Q18433			1
cel:CELE	BE0003N10.1	up:Q965N3	Q965N3	equivalent					0	0	0				0		O18244			1		Q18517			1
cel:CELE	BE0003N10.2	up:Q965N4	Q965N4	equivalent					0	0	0				0		O18251			1		Q18573			1
cel:CELE	BE0003N10.3	up:A0A0K3AX46	A0A0K3AX46	equivalent					0	0	0				0		O18259			1		Q18597			1
cel:CELE	BE0003N10.6	up:A0A0K3AU39	A0A0K3AU39	equivalent					0	0	0				0		O44151			1		Q18598			1
cel:CELE	BE10.1	up:O17551	O17551	equivalent					0	0	0				0		O44174			1		Q18642			1
cel:CELE	BE10.2	up:O17554	O17554	equivalent					0	0	0				0		O44195			1		Q18645			1
cel:CELE	BE10.3	up:O17552	O17552	equivalent					0	0	0				0		O44471			1		Q18665			1
cel:CELE	BE10.4	up:O17553	O17553	equivalent					0	0	0				0		O44491			1		Q18706			1
cel:CELE	BE10.5	up:Q58A90	Q58A90	equivalent					0	0	0				0		O44495			1		Q18709			1
cel:CELE	C01A2.1	up:G3MU45	G3MU45	equivalent					0	0	0				0		O44504			1		Q18730			1
cel:CELE	C01A2.2	up:Q9XVT7	Q9XVT7	equivalent					0	0	0				0		O44508			1		Q18742			1
cel:CELE	C01A2.3	up:O02207	O02207	equivalent					0	0	0				0		O44543			1		Q18756			1
cel:CELE	C01A2.4	up:O02208	O02208	equivalent					0	0	0				0		O44584			1		Q18793			1
cel:CELE	C01A2.5	up:O02209	O02209	equivalent					0	0	0				0		O44594			1		Q18799			1
cel:CELE	C01A2.6	up:O02210	O02210	equivalent					0	0	0				0		O44616			1		Q18807			1
cel:CELE	C01A2.7	up:G3MU46	G3MU46	equivalent					0	0	0				0		O44662			1		Q18813			1
cel:CELE	C01A2.9	up:B0M0N1	B0M0N1	equivalent					0	0	0				0		O44665			1		Q18878			1
cel:CELE	C01B10.10	up:Q17542	Q17542	equivalent					0	0	0				0		O44692			1		Q18883			1
cel:CELE	C01B10.11	up:Q3Y3Z9	Q3Y3Z9	equivalent					0	0	0				0		O44705			1		Q18892			1
cel:CELE	C01B10.3	up:Q17543	Q17543	equivalent					0	0	0				0		O44706			1		Q18898			1
cel:CELE	C01B10.4	up:Q17541	Q17541	equivalent					1	0	0	Q17541			1		O44747			1		Q18913			1
cel:CELE	C01B10.44	up:D0VWM3	D0VWM3	equivalent					0	0	0				0		O44771			1		Q18923			1
cel:CELE	C01B10.5	up:Q95QZ0	Q95QZ0	equivalent					0	0	0				0		O44799			1		Q18925			1
cel:CELE	C01B10.6	up:H2KYC9	H2KYC9	equivalent					0	0	0				0		O44921			1		Q18945			1
cel:CELE	C01B10.7	up:Q17538	Q17538	equivalent					1	0	0	Q17538			1		O44923			1		Q18974			1
cel:CELE	C01B10.8	up:Q17539	Q17539	equivalent					0	0	0				0		O44975			1		Q19015			1
cel:CELE	C01B10.9	up:Q17540	Q17540	equivalent					0	0	0				0		O45003			1		Q19059			1
cel:CELE	C01B12.1	up:O17209	O17209	equivalent					1	0	0	O17209			1		O45058			1		Q19075			1
cel:CELE	C01B12.2	up:O17208	O17208	equivalent					0	0	0				0		O45083			1		Q19079			1
cel:CELE	C01B12.3	up:O17206	O17206	equivalent					0	0	0				0		O45102			1		Q19091			1
cel:CELE	C01B12.4	up:O17204	O17204	equivalent					0	0	0				0		O45189			1		Q19148			1
cel:CELE	C01B12.5	up:O17205	O17205	equivalent					0	0	0				0		O45227			1		Q19151			1
cel:CELE	C01B12.8	up:O17210	O17210	equivalent					0	0	0				0		O45311			1		Q19159			1
cel:CELE	C01B4.1	up:Q9UAU2	Q9UAU2	equivalent					0	0	0				0		O45316			1		Q19181			1
cel:CELE	C01B4.10	up:G5EEU9	G5EEU9	equivalent					0	0	0				0		O45323			1		Q19203			1
cel:CELE	C01B4.3	up:G5EE51	G5EE51	equivalent					0	0	0				0		O45346			1		Q19223			1
cel:CELE	C01B4.5	up:G5EFQ7	G5EFQ7	equivalent					0	0	0				0		O45353			1		Q19229			1
cel:CELE	C01B4.6	up:G5ECR6	G5ECR6	equivalent					1	0	0	G5ECR6			1		O45394			1		Q19231			1
cel:CELE	C01B4.7	up:G5EDZ6	G5EDZ6	equivalent					0	0	0				0		O45423			1		Q19246			1
cel:CELE	C01B4.8	up:G5EDB5	G5EDB5	equivalent					1	0	1	G5EDB5		G5EDB5	2		O45426			1		Q19302			1
cel:CELE	C01B4.9	up:Q9UAT3	Q9UAT3	equivalent					0	0	0				0		O45428			1		Q19377			1
cel:CELE	C01B7.1	up:H2KYB2	H2KYB2	equivalent					0	0	0				0		O45442			1		Q19390			1
cel:CELE	C01B7.3	up:Q17546	Q17546	equivalent					0	0	0				0		O45508			1		Q19419			1
cel:CELE	C01B7.4	up:Q17549	Q17549	equivalent					1	0	0	Q17549			1		O45531			1		Q19430			1
cel:CELE	C01B7.5	up:Q17550	Q17550	equivalent					0	0	0				0		O45535			1		Q19434			1
cel:CELE	C01B7.6	up:Q17551	Q17551	equivalent					0	0	0				0		O45596			1		Q19442			1
cel:CELE	C01B7.7	up:G5EEP1	G5EEP1	equivalent					0	0	0				0		O45601			1		Q19451			1
cel:CELE	C01B9.1	up:A5Z2X0	A5Z2X0	equivalent					0	0	0				0		O45687			1		Q19462			1
cel:CELE	C01B9.4	up:D2Y8W4	D2Y8W4	equivalent					0	0	0				0		O45700			1		Q19478			1
cel:CELE	C01C10.1	up:Q11085	Q11085	equivalent					0	0	0				0		O45710			1		Q19517			1
cel:CELE	C01C10.2	up:Q6AHQ9	Q6AHQ9	equivalent					0	0	0				0		O45730			1		Q19528			1
cel:CELE	C01C10.3	up:Q11087	Q11087	equivalent					1	0	0	Q11087			1		O45740			1		Q19567			1
cel:CELE	C01C10.4	up:Q9NGJ7	Q9NGJ7	equivalent					0	0	0				0		O45752			1		Q19573			1
cel:CELE	C01C4.1	up:Q11088	Q11088	equivalent					0	0	0				0		O45779			1		Q19627			1
cel:CELE	C01C4.2	up:Q11089	Q11089	equivalent					0	0	0				0		O45792			1		Q19663			1
cel:CELE	C01C4.3	up:Q11090	Q11090	equivalent					0	0	0				0		O45806			1		Q19673			1
cel:CELE	C01C7.1	up:G5EBZ8	G5EBZ8	equivalent					0	0	0				0		O45813			1		Q19743			1
cel:CELE	C01F1.1	up:Q17558	Q17558	equivalent					0	0	0				0		O45822			1		Q19744			1
cel:CELE	C01F1.2	up:Q17557	Q17557	equivalent					0	0	0				0		O45830			1		Q19774			1
cel:CELE	C01F1.3	up:Q17556	Q17556	equivalent					0	0	0				0		O45838			1		Q19776			1
cel:CELE	C01F1.4	up:Q17553	Q17553	equivalent					0	0	0				0		O45891			1		Q19779			1
cel:CELE	C01F1.5	up:Q17554	Q17554	equivalent					0	0	0				0		O45969			1		Q19787			1
cel:CELE	C01F1.6	up:Q17555	Q17555	equivalent					0	0	0				0		O61203			1		Q19796			1
cel:CELE	C01F4.2	up:O01443	O01443	equivalent					0	0	0				0		O61209			1		Q19797			1
cel:CELE	C01F6.1	up:Q17559	Q17559	equivalent					0	0	0				0		O61218			1		Q19821			1
cel:CELE	C01F6.14	up:G3MTY9	G3MTY9	equivalent					0	0	0				0		O61738			1		Q19830			1
cel:CELE	C01F6.2	up:Q17560	Q17560	equivalent					0	0	0				0		O61781			1		Q19831			1
cel:CELE	C01F6.4	up:P34691	P34691	equivalent					0	0	0				0		O61782			1		Q19845			1
cel:CELE	C01F6.5	up:Q17561	Q17561	equivalent					1	0	0	Q17561			1		O61790			1		Q19891			1
cel:CELE	C01F6.6	up:G5EFP7	G5EFP7	equivalent					0	0	0				0		O61794			1		Q19895			1
cel:CELE	C01F6.8	up:G5EFZ5	G5EFZ5	equivalent					0	0	0				0		O61795			1		Q19900			1
cel:CELE	C01F6.9	up:G5EDA6	G5EDA6	equivalent					0	0	0				0		O61801			1		Q19916			1
cel:CELE	C01G10.1	up:Q93161	Q93161	equivalent					0	0	0				0		O61803			1		Q19930			1
cel:CELE	C01G10.10	up:Q93170	Q93170	equivalent					0	0	0				0		O61816			1		Q19942			1
cel:CELE	C01G10.11	up:E0AHC6	E0AHC6	equivalent					0	0	0				0		O61834			1		Q19977			1
cel:CELE	C01G10.12	up:Q93171	Q93171	equivalent					0	0	0				0		O61844			1		Q19980			1
cel:CELE	C01G10.14	up:Q93173	Q93173	equivalent					0	0	0				0		O61854			1		Q1XFZ1			1
cel:CELE	C01G10.15	up:Q7YX84	Q7YX84	equivalent					0	0	0				0		O61857			1		Q1ZXS1			1
cel:CELE	C01G10.16	up:Q7YX83	Q7YX83	equivalent					0	0	0				0		O61865			1		Q1ZXU0			1
cel:CELE	C01G10.17	up:Q2XMZ3	Q2XMZ3	equivalent					0	0	0				0		O61869			1		Q20012			1
cel:CELE	C01G10.18	up:B1Q267	B1Q267	equivalent					0	0	0				0		O61919			1		Q20054			1
cel:CELE	C01G10.3	up:Q93163	Q93163	equivalent					1	0	0	Q93163			1		O61929			1		Q20116			1
cel:CELE	C01G10.4	up:Q93164	Q93164	equivalent					0	0	0				0		O62034			1		Q20138			1
cel:CELE	C01G10.5	up:Q93165	Q93165	equivalent					0	0	0				0		O62073			1		Q20140			1
cel:CELE	C01G10.6	up:Q93166	Q93166	equivalent					0	0	0				0		O62075			1		Q20143			1
cel:CELE	C01G10.7	up:Q93167	Q93167	equivalent					0	0	0				0		O62076			1		Q20170			1
cel:CELE	C01G10.8	up:Q93168	Q93168	equivalent					0	0	0				0		O62077			1		Q20177			1
cel:CELE	C01G10.9	up:Q93169	Q93169	equivalent					0	0	0				0		O62078			1		Q20197			1
cel:CELE	C01G12.1	up:O45233	O45233	equivalent					0	0	0				0		O62085			1		Q20245			1
cel:CELE	C01G12.10	up:Q7YX80	Q7YX80	equivalent					0	0	1			Q7YX80	1		O62091			1		Q20265			1
cel:CELE	C01G12.11	up:Q7YX79	Q7YX79	equivalent					0	0	0				0		O62092			1		Q20266			1
cel:CELE	C01G12.13	up:Q4ZGE5	Q4ZGE5	equivalent					0	0	0				0		O62103			1		Q20270			1
cel:CELE	C01G12.16	up:H2L270	H2L270	equivalent					0	0	0				0		O62122			1		Q20276			1
cel:CELE	C01G12.2	up:O45234	O45234	equivalent					0	0	1			O45234	1		O62133			1		Q20311			1
cel:CELE	C01G12.3	up:O45235	O45235	equivalent					0	0	0				0		O62142			1		Q20325			1
cel:CELE	C01G12.5	up:O45236	O45236	equivalent					0	0	0				0		O62149			1		Q20330			1
cel:CELE	C01G12.6	up:O45237	O45237	equivalent					0	0	1			O45237	1		O62239			1		Q20331			1
cel:CELE	C01G12.7	up:O45238	O45238	equivalent					0	0	0				0		O62247			1		Q20380			1
cel:CELE	C01G12.8	up:G5EFV6	G5EFV6	equivalent					0	0	0				0		O62271			1		Q20382			1
cel:CELE	C01G12.9	up:Q7YX81	Q7YX81	equivalent					0	0	0				0		O62281			1		Q20403			1
cel:CELE	C01G5.2	up:Q17567	Q17567	equivalent					0	0	0				0		O62309			1		Q20404			1
cel:CELE	C01G5.25	up:U4PB93	U4PB93	equivalent					0	0	0				0		O62317			1		Q20437			1
cel:CELE	C01G5.3	up:Q17565	Q17565	equivalent					0	0	0				0		O62324			1		Q20452			1
cel:CELE	C01G5.4	up:Q17566	Q17566	equivalent					0	0	0				0		O62334			1		Q20500			1
cel:CELE	C01G5.5	up:Q17568	Q17568	equivalent					0	0	0				0		O62378			1		Q20503			1
cel:CELE	C01G5.6	up:Q17569	Q17569	equivalent					0	0	0				0		O62416			1		Q20507			1
cel:CELE	C01G5.7	up:V6CIV2	V6CIV2	equivalent					0	0	0				0		O62452			1		Q20510			1
cel:CELE	C01G5.8	up:P90740	P90740	equivalent					0	0	0				0		O62476			1		Q20511			1
cel:CELE	C01G5.9	up:Q9TXQ7	Q9TXQ7	equivalent					0	0	0				0		O62511			1		Q20516			1
cel:CELE	C01G6.1	up:Q17571	Q17571	equivalent					0	0	0				0		O76600			1		Q20519			1
cel:CELE	C01G6.2	up:Q17578	Q17578	equivalent					0	0	0				0		O76610			1		Q20612			1
cel:CELE	C01G6.3	up:Q17572	Q17572	equivalent					0	0	0				0		O76635			1		Q20613			1
cel:CELE	C01G6.4	up:Q17573	Q17573	equivalent					0	0	0				0		O76670			1		Q20652			1
cel:CELE	C01G6.5	up:P46012	P46012	equivalent					0	0	0				0		O76694			1		Q20691			1
cel:CELE	C01G6.6	up:Q17574	Q17574	equivalent					0	0	0				0		O76725			1		Q20692			1
cel:CELE	C01G6.7	up:Q17577	Q17577	equivalent					0	0	0				0		P08124			1		Q20697			1
cel:CELE	C01G6.8	up:G5EGK5	G5EGK5	equivalent					0	0	0				0		P08898			1		Q20747			1
cel:CELE	C01G6.9	up:Q17575	Q17575	equivalent					0	0	0				0		P10038			1		Q20790			1
cel:CELE	C01G8.1	up:H2KYD5	H2KYD5	equivalent					0	0	0				0		P10771			1		Q20791			1
cel:CELE	C01G8.2	up:G5ECU8	G5ECU8	equivalent					0	0	0				0		P14585			1		Q20826			1
cel:CELE	C01G8.3	up:P91013	P91013	equivalent					0	0	0				0		P17488			1		Q20866			1
cel:CELE	C01G8.4	up:P91014	P91014	equivalent					0	0	0				0		P17657			1		Q20902			1
cel:CELE	C01G8.5	up:G5EES2	G5EES2	equivalent					0	0	0				0		P18835			1		Q20925			1
cel:CELE	C01G8.6	up:P91017	P91017	equivalent					0	0	0				0		P20784			1		Q20935			1
cel:CELE	C01G8.9	up:J7SA49	J7SA49	equivalent					0	0	0				0		P21541			1		Q20936			1
cel:CELE	C01H6.1	up:Q17582	Q17582	equivalent					0	0	0				0		P25807			1		Q20939			1
cel:CELE	C01H6.2	up:Q17583	Q17583	equivalent					0	0	0				0		P30646			1		Q20950			1
cel:CELE	C01H6.3	up:Q17580	Q17580	equivalent					0	0	0				0		P34264			1		Q20964			1
cel:CELE	C01H6.4	up:Q17585	Q17585	equivalent					0	0	0				0		P34269			1		Q21141			1
cel:CELE	C01H6.5	up:P41828	P41828	equivalent					0	0	0				0		P34289			1		Q21188			1
cel:CELE	C01H6.6	up:Q17586	Q17586	equivalent					0	0	0				0		P34320			1		Q21192			1
cel:CELE	C01H6.7	up:Q17581	Q17581	equivalent					0	0	0				0		P34348			1		Q21248			1
cel:CELE	C01H6.8	up:A5JYT3	A5JYT3	equivalent					0	0	0				0		P34370			1		Q21300			1
cel:CELE	C01H6.9	up:G5EE25	G5EE25	equivalent					0	0	0				0		P34390			1		Q21327			1
cel:CELE	C02A12.1	up:O16198	O16198	equivalent					0	0	1			O16198	1		P34407			1		Q21430			1
cel:CELE	C02A12.10	up:Q5F4V2	Q5F4V2	equivalent					0	0	0				0		P34412			1		Q21459			1
cel:CELE	C02A12.2	up:Q5F4V7	Q5F4V7	equivalent					0	0	0				0		P34427			1		Q21464			1
cel:CELE	C02A12.3	up:Q5F4V6	Q5F4V6	equivalent					0	0	0				0		P34434			1		Q21465			1
cel:CELE	C02A12.4	up:O16202	O16202	equivalent					0	0	0				0		P34456			1		Q21471			1
cel:CELE	C02A12.5	up:Q5F4V5	Q5F4V5	equivalent					0	0	0				0		P34483			1		Q21515			1
cel:CELE	C02A12.6	up:Q5F4V0	Q5F4V0	equivalent					0	0	0				0		P34495			1		Q21526			1
cel:CELE	C02A12.8	up:Q5F4V4	Q5F4V4	equivalent					0	0	0				0		P34618			1		Q21544			1
cel:CELE	C02A12.9	up:Q5F4V3	Q5F4V3	equivalent					0	0	0				0		P34650			1		Q21552			1
cel:CELE	C02B10.1	up:G5EEH6	G5EEH6	equivalent					0	0	0				0		P34713			1		Q21556			1
cel:CELE	C02B10.2	up:O44445	O44445	equivalent					0	0	0				0		P35799			1		Q21562			1
cel:CELE	C02B10.3	up:O44443	O44443	equivalent					0	0	0				0		P41829			1		Q21574			1
cel:CELE	C02B10.4	up:O44444	O44444	equivalent					0	0	0				0		P41881			1		Q21645			1
cel:CELE	C02B10.5	up:O44447	O44447	equivalent					0	0	0				0		P41941			1		Q21653			1
cel:CELE	C02B10.6	up:O44448	O44448	equivalent					0	0	0				0		P41995			1		Q21657			1
cel:CELE	C02B4.1	up:G5ECS8	G5ECS8	equivalent					0	0	0				0		P41999			1		Q21672			1
cel:CELE	C02B4.2	up:Q17589	Q17589	equivalent					1	0	0	Q17589			1		P42171			1		Q21703			1
cel:CELE	C02B4.3	up:Q17590	Q17590	equivalent					0	0	0				0		P43507			1		Q21800			1
cel:CELE	C02B4.4	up:A5JYR5	A5JYR5	equivalent					0	0	0				0		P43508			1		Q21801			1
cel:CELE	C02B8.1	up:Q11091	Q11091	equivalent					0	0	0				0		P45896			1		Q21816			1
cel:CELE	C02B8.12	up:H8W3X1	H8W3X1	equivalent					0	0	0				0		P48996			1		Q21849			1
cel:CELE	C02B8.2	up:Q11092	Q11092	equivalent					0	0	0				0		P49713			1		Q21855			1
cel:CELE	C02B8.3	up:Q11093	Q11093	equivalent					0	0	0				0		P52014			1		Q21857			1
cel:CELE	C02B8.4	up:Q11094	Q11094	equivalent					0	0	0				0		P52716			1		Q21864			1
cel:CELE	C02B8.5	up:Q11095	Q11095	equivalent					0	0	0				0		P52880			1		Q21867			1
cel:CELE	C02B8.6	up:Q11096	Q11096	equivalent					0	0	0				0		P54126			1		Q21875			1
cel:CELE	C02B8.7	up:Q11097	Q11097	equivalent					0	0	0				0		P55113			1		Q21941			1
cel:CELE	C02C2.1	up:P34269	P34269	equivalent					1	0	0	P34269			1		P90771			1		Q21959			1
cel:CELE	C02C2.3	up:P34271	P34271	equivalent					0	0	0				0		P90832			1		Q22042			1
cel:CELE	C02C2.4	up:P34272	P34272	equivalent					1	0	1	P34272		P34272	2		P90951			1		Q22060			1
cel:CELE	C02C2.5	up:P34273	P34273	equivalent					0	0	0				0		P91043			1		Q22085			1
cel:CELE	C02C6.1	up:P39055	P39055	equivalent					0	0	0				0		P91107			1		Q22128			1
cel:CELE	C02C6.2	up:Q564X8	Q564X8	equivalent					0	0	0				0		P91127			1		Q22219			1
cel:CELE	C02C6.3	up:Q93177	Q93177	equivalent					0	0	0				0		P91160			1		Q22266			1
cel:CELE	C02D4.1	up:Q6LA91	Q6LA91	equivalent					0	0	0				0		P91196			1		Q22288			1
cel:CELE	C02D4.2	up:O02213	O02213	equivalent					0	0	0				0		P91204			1		Q22303			1
cel:CELE	C02D5.1	up:P34275	P34275	equivalent					0	0	0				0		P91230			1		Q22312			1
cel:CELE	C02D5.2	up:P34276	P34276	equivalent					0	0	0				0		P91249			1		Q22324			1
cel:CELE	C02D5.3	up:P34277	P34277	equivalent					0	0	0				0		P91274			1		Q22388			1
cel:CELE	C02D5.4	up:D7SFI3	D7SFI3	equivalent					0	0	0				0		P91321			1		Q22393			1
cel:CELE	C02E11.1	up:Q9UAN9	Q9UAN9	equivalent					0	0	0				0		P91442			1		Q22396			1
cel:CELE	C02E7.1	up:O16436	O16436	equivalent					0	0	0				0		P91460			1		Q22446			1
cel:CELE	C02E7.10	up:O16435	O16435	equivalent					0	0	0				0		P91487			1		Q22508			1
cel:CELE	C02E7.13	up:O16439	O16439	equivalent					0	0	0				0		P91489			1		Q22537			1
cel:CELE	C02E7.2	up:O16433	O16433	equivalent					0	0	0				0		P91516			1		Q22574			1
cel:CELE	C02E7.3	up:O16432	O16432	equivalent					0	0	0				0		P91519			1		Q22577			1
cel:CELE	C02E7.4	up:H8W3X2	H8W3X2	equivalent					0	0	0				0		P91547			1		Q22585			1
cel:CELE	C02E7.5	up:O16430	O16430	equivalent					0	0	0				0		P91548			1		Q22613			1
cel:CELE	C02E7.6	up:O16428	O16428	equivalent					0	0	0				0		P91563			1		Q22614			1
cel:CELE	C02E7.7	up:O16427	O16427	equivalent					0	0	0				0		P91991			1		Q22631			1
cel:CELE	C02E7.8	up:O16429	O16429	equivalent					0	0	0				0		P92006			1		Q22633			1
cel:CELE	C02E7.9	up:O16434	O16434	equivalent					0	0	0				0		P92018			1		Q22642			1
cel:CELE	C02F12.1	up:B3WFU6	B3WFU6	equivalent					1	0	0	B3WFU6			1		Q03566			1		Q22643			1
cel:CELE	C02F12.10	up:A3FPJ2	A3FPJ2	equivalent					0	0	0				0		Q03599			1		Q22671			1
cel:CELE	C02F12.3	up:Q11099	Q11099	equivalent					0	0	0				0		Q03605			1		Q22678			1
cel:CELE	C02F12.4	up:Q11100	Q11100	equivalent					1	0	0	Q11100			1		Q03615			1		Q22715			1
cel:CELE	C02F12.5	up:Q11101	Q11101	equivalent					0	0	0				0		Q067X2			1		Q22728			1
cel:CELE	C02F12.7	up:Q11102	Q11102	equivalent					0	0	0				0		Q09262			1		Q22815			1
cel:CELE	C02F12.8	up:Q11103	Q11103	equivalent					0	0	0				0		Q09266			1		Q22825			1
cel:CELE	C02F12.9	up:Q95ZZ4	Q95ZZ4	equivalent					0	0	0				0		Q09282			1		Q22853			1
cel:CELE	C02F4.1	up:G5EEN3	G5EEN3	equivalent					0	0	0				0		Q09311			1		Q22933			1
cel:CELE	C02F4.2	up:Q0G819	Q0G819	equivalent					0	0	0				0		Q09321			1		Q22971			1
cel:CELE	C02F4.4	up:Q93185	Q93185	equivalent					0	0	0				0		Q09341			1		Q22986			1
cel:CELE	C02F4.5	up:Q93186	Q93186	equivalent					0	0	0				0		Q09401			1		Q22988			1
cel:CELE	C02F5.1	up:P34278	P34278	equivalent					0	0	0				0		Q09455			1		Q22989			1
cel:CELE	C02F5.10	up:P34287	P34287	equivalent					0	0	0				0		Q09484			1		Q23012			1
cel:CELE	C02F5.11	up:Q95QY8	Q95QY8	equivalent					1	0	0	Q95QY8			1		Q09492			1		Q23036			1
cel:CELE	C02F5.12	up:Q95QY7	Q95QY7	equivalent					0	0	0				0		Q09495			1		Q23151			1
cel:CELE	C02F5.13	up:P61228	P61228	equivalent					0	0	0				0		Q09528			1		Q23162			1
cel:CELE	C02F5.14	up:Q4PJ10	Q4PJ10	equivalent					0	0	0				0		Q09534			1		Q23163			1
cel:CELE	C02F5.2	up:P34279	P34279	equivalent					0	0	0				0		Q09551			1		Q23164			1
cel:CELE	C02F5.3	up:P34280	P34280	equivalent					0	0	0				0		Q09600			1		Q23165			1
cel:CELE	C02F5.4	up:P34281	P34281	equivalent					0	0	0				0		Q09626			1		Q23189			1
cel:CELE	C02F5.5	up:P34282	P34282	equivalent					0	0	0				0		Q09632			1		Q23269			1
cel:CELE	C02F5.6	up:P34283	P34283	equivalent					0	0	0				0		Q09635			1		Q23323			1
cel:CELE	C02F5.7	up:P34284	P34284	equivalent					0	0	0				0		Q09655			1		Q23384			1
cel:CELE	C02F5.8	up:P34285	P34285	equivalent					0	0	0				0		Q09663			1		Q23489			1
cel:CELE	C02F5.9	up:P34286	P34286	equivalent					0	0	0				0		Q09978			1		Q23537			1
cel:CELE	C02G6.1	up:Q17592	Q17592	equivalent					0	0	0				0		Q09EF0			1		Q23553			1
cel:CELE	C02G6.2	up:Q17593	Q17593	equivalent					0	0	0				0		Q0MQ65			1		Q23605			1
cel:CELE	C02G6.3	up:Q194S6	Q194S6	equivalent					0	0	0				0		Q10017			1		Q23635			1
cel:CELE	C02H6.1	up:O17053	O17053	equivalent					0	0	0				0		Q10018			1		Q23650			1
cel:CELE	C02H6.2	up:O17054	O17054	equivalent					1	0	0	O17054			1		Q10025			1		Q27245			1
cel:CELE	C02H6.3	up:K8ESI1	K8ESI1	equivalent					0	0	0				0		Q10028			1		Q27484			1
cel:CELE	C02H7.1	up:Q17595	Q17595	equivalent					0	0	0				0		Q10128			1		Q27504			1
cel:CELE	C02H7.2	up:Q17594	Q17594	equivalent					0	0	0				0		Q10131			1		Q27513			1
cel:CELE	C02H7.3	up:O02626	O02626	equivalent					0	0	0				0		Q10457			1		Q27517			1
cel:CELE	C03A3.1	up:Q17597	Q17597	equivalent					0	0	0				0		Q10909			1		Q27520			1
cel:CELE	C03A3.2	up:Q17598	Q17598	equivalent					0	0	0				0		Q10910			1		Q27521			1
cel:CELE	C03A3.3	up:Q17596	Q17596	equivalent					0	0	0				0		Q10936			1		Q27526			1
cel:CELE	C03A7.10	up:O16505	O16505	equivalent					0	0	0				0		Q10939			1		Q27531			1
cel:CELE	C03A7.11	up:O16506	O16506	equivalent					0	0	0				0		Q11081			1		Q27888			1
cel:CELE	C03A7.12	up:O16507	O16507	equivalent					0	0	0				0		Q11087			1		Q27894			1
cel:CELE	C03A7.13	up:O16510	O16510	equivalent					0	0	0				0		Q11100			1		Q27GT6			1
cel:CELE	C03A7.14	up:O16511	O16511	equivalent					0	0	0				0		Q11177			1		Q2A954			1
cel:CELE	C03A7.2	up:O16508	O16508	equivalent					0	0	0				0		Q11184			1		Q2AAB5			1
cel:CELE	C03A7.3	up:O16503	O16503	equivalent					0	0	0				0		Q17334			1		Q2AAB9			1
cel:CELE	C03A7.4	up:O16500	O16500	equivalent					0	0	0				0		Q17404			1		Q2L6V7			1
cel:CELE	C03A7.5	up:O16498	O16498	equivalent					0	0	0				0		Q17452			1		Q2L6X1			1
cel:CELE	C03A7.6	up:O16499	O16499	equivalent					0	0	0				0		Q17454			1		Q2PJ98			1
cel:CELE	C03A7.7	up:O16501	O16501	equivalent					0	0	0				0		Q17456			1		Q2V068			1
cel:CELE	C03A7.8	up:O16502	O16502	equivalent					0	0	0				0		Q17466			1		Q2V077			1
cel:CELE	C03A7.9	up:O16504	O16504	equivalent					0	0	0				0		Q17469			1		Q2V4T5			1
cel:CELE	C03B1.1	up:Q11108	Q11108	equivalent					0	0	0				0		Q17538			1		Q2XMY7			1
cel:CELE	C03B1.10	up:Q11116	Q11116	equivalent					0	0	0				0		Q17541			1		Q336L0			1
cel:CELE	C03B1.12	up:Q11117	Q11117	equivalent					0	0	0				0		Q17549			1		Q3Y3Z7			1
cel:CELE	C03B1.13	up:Q95QY6	Q95QY6	equivalent					1	0	0	Q95QY6			1		Q17561			1		Q400N4			1
cel:CELE	C03B1.14	up:Q95QY5	Q95QY5	equivalent					0	0	0				0		Q17589			1		Q45EK2			1
cel:CELE	C03B1.2	up:Q11109	Q11109	equivalent					0	0	0				0		Q17600			1		Q4PIT2			1
cel:CELE	C03B1.3	up:Q11110	Q11110	equivalent					0	0	0				0		Q17649			1		Q4R104			1
cel:CELE	C03B1.4	up:Q11111	Q11111	equivalent					0	0	0				0		Q17662			1		Q4R111			1
cel:CELE	C03B1.5	up:Q11112	Q11112	equivalent					0	0	0				0		Q17663			1		Q4R127			1
cel:CELE	C03B1.6	up:Q11113	Q11113	equivalent					0	0	0				0		Q17677			1		Q4R145			1
cel:CELE	C03B1.7	up:Q11114	Q11114	equivalent					0	0	0				0		Q17746			1		Q4R162			1
cel:CELE	C03B1.9	up:Q11115	Q11115	equivalent					0	0	0				0		Q17757			1		Q4R165			1
cel:CELE	C03B8.2	up:Q11105	Q11105	equivalent					0	0	0				0		Q17772			1		Q4R166			1
cel:CELE	C03B8.3	up:Q11106	Q11106	equivalent					0	0	0				0		Q17812			1		Q4R169			1
cel:CELE	C03B8.4	up:Q11107	Q11107	equivalent					0	0	0				0		Q17837			1		Q4R175			1
cel:CELE	C03C10.1	up:P42168	P42168	equivalent					0	0	0				0		Q17847			1		Q4TT81			1
cel:CELE	C03C10.2	up:P42169	P42169	equivalent					0	0	0				0		Q17884			1		Q4TTA8			1
cel:CELE	C03C10.3	up:P42170	P42170	equivalent					0	0	0				0		Q17903			1		Q4TTB4			1
cel:CELE	C03C10.4	up:P42171	P42171	equivalent					1	0	0	P42171			1		Q17910			1		Q4TTB5			1
cel:CELE	C03C10.5	up:P42172	P42172	equivalent					0	0	0				0		Q17975			1		Q4TTC1			1
cel:CELE	C03C10.7	up:Q7YX72	Q7YX72	equivalent					0	0	0				0		Q17993			1		Q4TTC5			1
cel:CELE	C03C10.9	up:C1P626	C1P626	equivalent					0	0	0				0		Q17996			1		Q4TTC8			1
cel:CELE	C03C11.1	up:Q9XVT6	Q9XVT6	equivalent					0	0	0				0		Q18006			1		Q4W4Z4			1
cel:CELE	C03C11.2	up:G5EDX7	G5EDX7	equivalent					0	0	0				0		Q18014			1		Q4W528			1
cel:CELE	C03D6.1	up:Q17600	Q17600	equivalent					1	0	0	Q17600			1		Q18070			1		Q4W5R9			1
cel:CELE	C03D6.3	up:Q17607	Q17607	equivalent					0	0	0				0		Q18130			1		Q4W5T1			1
cel:CELE	C03D6.4	up:Q17602	Q17602	equivalent					0	0	0				0		Q18152			1		Q4W5T4			1
cel:CELE	C03D6.5	up:Q17603	Q17603	equivalent					0	0	0				0		Q18153			1		Q4ZGE3			1
cel:CELE	C03D6.6	up:Q17604	Q17604	equivalent					0	0	0				0		Q18156			1		Q56VX9			1
cel:CELE	C03D6.8	up:Q17606	Q17606	equivalent					0	0	0				0		Q18199			1		Q58AA1			1
cel:CELE	C03D6.9	up:A0A061AL07	A0A061AL07	equivalent					0	0	0				0		Q18200			1		Q5CCI6			1
cel:CELE	C03E10.1	up:O17557	O17557	equivalent					0	0	0				0		Q18253			1		Q5F4U9			1
cel:CELE	C03E10.3	up:O17559	O17559	equivalent					0	0	0				0		Q18299			1		Q5WRK8			1
cel:CELE	C03E10.4	up:O17560	O17560	equivalent					0	0	0				0		Q18335			1		Q5WRU4			1
cel:CELE	C03E10.5	up:O17562	O17562	equivalent					0	0	0				0		Q18345			1		Q629J2			1
cel:CELE	C03E10.6	up:O62024	O62024	equivalent					0	0	0				0		Q18433			1		Q65CM0			1
cel:CELE	C03F11.1	up:Q11122	Q11122	equivalent					0	0	0				0		Q18517			1		Q65XX4			1
cel:CELE	C03F11.2	up:Q11123	Q11123	equivalent					0	0	0				0		Q18573			1		Q6AHP9			1
cel:CELE	C03F11.3	up:Q11124	Q11124	equivalent					0	0	0				0		Q18597			1		Q6BES2			1
cel:CELE	C03F11.4	up:Q11125	Q11125	equivalent					0	0	0				0		Q18598			1		Q6LCK7			1
cel:CELE	C03G5.1	up:Q09508	Q09508	equivalent					0	0	0				0		Q18642			1		Q75MI6			1
cel:CELE	C03G5.10	up:Q4TTA5	Q4TTA5	equivalent					0	0	0				0		Q18665			1		Q7JK99			1
cel:CELE	C03G5.11	up:Q4TTA4	Q4TTA4	equivalent					0	0	0				0		Q18706			1		Q7JKM7			1
cel:CELE	C03G5.12	up:G5EDF2	G5EDF2	equivalent					0	0	0				0		Q18709			1		Q7JNW8			1
cel:CELE	C03G5.13	up:G5EDF2	G5EDF2	equivalent					0	0	0				0		Q18730			1		Q7KPV8			1
cel:CELE	C03G5.14	up:H8W3X3	H8W3X3	equivalent					0	0	0				0		Q18742			1		Q7KPX2			1
cel:CELE	C03G5.2	up:Q8WQG6	Q8WQG6	equivalent					0	0	0				0		Q18756			1		Q7YTK3			1
cel:CELE	C03G5.7	up:O61466	O61466	equivalent					0	0	0				0		Q18793			1		Q7YTM1			1
cel:CELE	C03G5.8	up:Q65ZI6	Q65ZI6	equivalent					0	0	0				0		Q18799			1		Q7YTM6			1
cel:CELE	C03G5.9	up:G5EDF2	G5EDF2	equivalent					0	0	0				0		Q18807			1		Q7YTQ8			1
cel:CELE	C03G6.10	up:O01446	O01446	equivalent					0	0	0				0		Q18813			1		Q7YWM2			1
cel:CELE	C03G6.11	up:O01450	O01450	equivalent					0	0	0				0		Q18878			1		Q7YWR0			1
cel:CELE	C03G6.13	up:O01452	O01452	equivalent					0	0	0				0		Q18883			1		Q7YWU1			1
cel:CELE	C03G6.14	up:O02627	O02627	equivalent					0	0	1			O02627	1		Q18892			1		Q7YWV5			1
cel:CELE	C03G6.15	up:O02628	O02628	equivalent					0	0	1			O02628	1		Q18913			1		Q7YWW3			1
cel:CELE	C03G6.16	up:O01459	O01459	equivalent					1	0	0	O01459			1		Q18923			1		Q7YWW4			1
cel:CELE	C03G6.17	up:O01460	O01460	equivalent					0	0	0				0		Q18925			1		Q7YX01			1
cel:CELE	C03G6.19	up:G5EFH4	G5EFH4	equivalent					0	0	0				0		Q18945			1		Q7YX03			1
cel:CELE	C03G6.2	up:O01457	O01457	equivalent					1	0	0	O01457			1		Q18974			1		Q7YX09			1
cel:CELE	C03G6.21	up:M1ZMJ5	M1ZMJ5	equivalent					0	0	0				0		Q19015			1		Q7YX16			1
cel:CELE	C03G6.3	up:O01456	O01456	equivalent					0	0	0				0		Q19059			1		Q7YX17			1
cel:CELE	C03G6.5	up:O01454	O01454	equivalent					0	0	0				0		Q19075			1		Q7YX22			1
cel:CELE	C03G6.6	up:O01453	O01453	equivalent					0	0	0				0		Q19079			1		Q7YX36			1
cel:CELE	C03G6.7	up:O01451	O01451	equivalent					0	0	0				0		Q19091			1		Q7YX43			1
cel:CELE	C03G6.8	up:O01448	O01448	equivalent					0	0	0				0		Q19148			1		Q7YX44			1
cel:CELE	C03G6.9	up:O01447	O01447	equivalent					0	0	0				0		Q19151			1		Q7YX56			1
cel:CELE	C03H12.1	up:G5ECV3	G5ECV3	equivalent					0	0	0				0		Q19159			1		Q7YX60			1
cel:CELE	C03H5.1	up:O16660	O16660	equivalent					0	0	0				0		Q19181			1		Q7YX64			1
cel:CELE	C03H5.2	up:O16658	O16658	equivalent					0	0	0				0		Q19203			1		Q7YX65			1
cel:CELE	C03H5.3	up:O16657	O16657	equivalent					0	0	0				0		Q19223			1		Q7YX71			1
cel:CELE	C03H5.4	up:O16654	O16654	equivalent					0	0	0				0		Q19229			1		Q7YX74			1
cel:CELE	C03H5.5	up:O16656	O16656	equivalent					0	0	0				0		Q19246			1		Q7YX77			1
cel:CELE	C03H5.6	up:O16659	O16659	equivalent					0	0	0				0		Q19302			1		Q7YZW2			1
cel:CELE	C03H5.7	up:O16655	O16655	equivalent					0	0	0				0		Q19377			1		Q7Z148			1
cel:CELE	C03H5.9	up:E4MVC7	E4MVC7	equivalent					0	0	0				0		Q19390			1		Q7Z1Q6			1
cel:CELE	C04A11.1	up:O17567	O17567	equivalent					0	0	0				0		Q19419			1		Q86DA6			1
cel:CELE	C04A11.2	up:O17568	O17568	equivalent					0	0	0				0		Q19430			1		Q86DA7			1
cel:CELE	C04A11.3	up:O17566	O17566	equivalent					0	0	0				0		Q19434			1		Q86ME1			1
cel:CELE	C04A11.4	up:G5EDW5	G5EDW5	equivalent					0	0	0				0		Q19442			1		Q86NF6			1
cel:CELE	C04A11.5	up:Q7YX90	Q7YX90	equivalent					0	0	0				0		Q19462			1		Q86NH9			1
cel:CELE	C04A2.1	up:Q09445	Q09445	equivalent					0	0	0				0		Q19478			1		Q86S61			1
cel:CELE	C04A2.15	up:G4RV56	G4RV56	equivalent					0	0	0				0		Q19517			1		Q8I100			1
cel:CELE	C04A2.3	up:Q09228	Q09228	equivalent					0	0	0				0		Q19528			1		Q8I108			1
cel:CELE	C04A2.7	up:Q09446	Q09446	equivalent					0	0	0				0		Q19567			1		Q8I116			1
cel:CELE	C04B4.1	up:Q17619	Q17619	equivalent					0	0	0				0		Q19573			1		Q8I4E5			1
cel:CELE	C04B4.2	up:Q17620	Q17620	equivalent					0	0	0				0		Q19627			1		Q8I4L6			1
cel:CELE	C04B4.3	up:Q17622	Q17622	equivalent					0	0	0				0		Q19663			1		Q8I7H1			1
cel:CELE	C04B4.4	up:Q17621	Q17621	equivalent					0	0	0				0		Q19673			1		Q8I7K6			1
cel:CELE	C04B4.5	up:Q17617	Q17617	equivalent					0	0	0				0		Q19743			1		Q8I7M5			1
cel:CELE	C04B4.6	up:Q17618	Q17618	equivalent					0	0	0				0		Q19744			1		Q8ITZ2			1
cel:CELE	C04C11.1	up:Q17625	Q17625	equivalent					0	0	0				0		Q19776			1		Q8ITZ9			1
cel:CELE	C04C11.2	up:Q17624	Q17624	equivalent					0	0	0				0		Q19779			1		Q8MPR4			1
cel:CELE	C04C3.1	up:O44454	O44454	equivalent					0	0	0				0		Q19787			1		Q8MPT1			1
cel:CELE	C04C3.14	up:I2HAC2	I2HAC2	equivalent					0	0	0				0		Q19796			1		Q8MPY0			1
cel:CELE	C04C3.2	up:O44452	O44452	equivalent					0	0	0				0		Q19797			1		Q8MQ75			1
cel:CELE	C04C3.3	up:O44451	O44451	equivalent					0	0	0				0		Q19821			1		Q8MQ78			1
cel:CELE	C04C3.4	up:O44449	O44449	equivalent					0	0	0				0		Q19830			1		Q8MQ99			1
cel:CELE	C04C3.5	up:Q6I6D4	Q6I6D4	equivalent					0	0	0				0		Q19831			1		Q8MQB4			1
cel:CELE	C04C3.6	up:O44453	O44453	equivalent					0	0	0				0		Q19845			1		Q8MXJ5			1
cel:CELE	C04C3.7	up:O44455	O44455	equivalent					0	0	0				0		Q19891			1		Q8MXR1			1
cel:CELE	C04C3.9	up:G4RT99	G4RT99	equivalent					0	0	0				0		Q19895			1		Q8MYN6			1
cel:CELE	C04D8.1	up:H1ZUV8	H1ZUV8	equivalent					0	0	0				0		Q19900			1		Q8TA47			1
cel:CELE	C04E12.2	up:O76679	O76679	equivalent					0	0	0				0		Q19916			1		Q8WTM1			1
cel:CELE	C04E12.4	up:O76677	O76677	equivalent					0	0	0				0		Q19930			1		Q8WTM3			1
cel:CELE	C04E12.5	up:O76676	O76676	equivalent					0	0	0				0		Q19942			1		Q93163			1
cel:CELE	C04E12.7	up:G5EG07	G5EG07	equivalent					0	0	0				0		Q19980			1		Q93192			1
cel:CELE	C04E12.8	up:O76680	O76680	equivalent					0	0	0				0		Q1XFZ1			1		Q93198			1
cel:CELE	C04E12.9	up:O76681	O76681	equivalent					0	0	0				0		Q1ZXU0			1		Q93206			1
cel:CELE	C04E6.10	up:O01468	O01468	equivalent					0	0	0				0		Q20012			1		Q93241			1
cel:CELE	C04E6.11	up:O01470	O01470	equivalent					0	0	0				0		Q20054			1		Q93250			1
cel:CELE	C04E6.13	up:Q8IFY6	Q8IFY6	equivalent					0	0	0				0		Q20116			1		Q93251			1
cel:CELE	C04E6.2	up:O01473	O01473	equivalent					0	0	0				0		Q20138			1		Q93356			1
cel:CELE	C04E6.3	up:O01472	O01472	equivalent					0	0	0				0		Q20140			1		Q93520			1
cel:CELE	C04E6.4	up:O01469	O01469	equivalent					0	0	0				0		Q20143			1		Q93694			1
cel:CELE	C04E6.5	up:O01467	O01467	equivalent					0	0	0				0		Q20170			1		Q93695			1
cel:CELE	C04E6.6	up:O01465	O01465	equivalent					0	0	0				0		Q20177			1		Q93696			1
cel:CELE	C04E6.7	up:O01464	O01464	equivalent					0	0	0				0		Q20197			1		Q93697			1
cel:CELE	C04E6.8	up:G4RVA5	G4RVA5	equivalent					0	0	0				0		Q20245			1		Q93781			1
cel:CELE	C04E6.9	up:O01466	O01466	equivalent					0	0	0				0		Q20265			1		Q93832			1
cel:CELE	C04E7.1	up:Q11192	Q11192	equivalent					0	0	0				0		Q20266			1		Q94056			1
cel:CELE	C04E7.2	up:Q11193	Q11193	equivalent					0	0	0				0		Q20270			1		Q94075			1
cel:CELE	C04E7.3	up:Q11194	Q11194	equivalent					0	0	0				0		Q20276			1		Q94168			1
cel:CELE	C04E7.4	up:Q8MQF0	Q8MQF0	equivalent					0	0	0				0		Q20311			1		Q94176			1
cel:CELE	C04E7.5	up:A3FPI9	A3FPI9	equivalent					0	0	0				0		Q20325			1		Q94259			1
cel:CELE	C04F1.1	up:O61738	O61738	equivalent					1	0	0	O61738			1		Q20330			1		Q94314			1
cel:CELE	C04F1.3	up:G5EC36	G5EC36	equivalent					0	0	0				0		Q20380			1		Q95011			1
cel:CELE	C04F12.1	up:Q9XVF1	Q9XVF1	equivalent					0	0	0				0		Q20382			1		Q95Q05			1
cel:CELE	C04F12.10	up:Q9XVE5	Q9XVE5	equivalent					0	0	0				0		Q20403			1		Q95QB3			1
cel:CELE	C04F12.12	up:B2D6P6	B2D6P6	equivalent					0	0	0				0		Q20404			1		Q95QF1			1
cel:CELE	C04F12.16	up:H2L2H1	H2L2H1	equivalent					0	0	0				0		Q20437			1		Q95QL1			1
cel:CELE	C04F12.3	up:G5EFS1	G5EFS1	equivalent					0	0	0				0		Q20452			1		Q95QL4			1
cel:CELE	C04F12.4	up:Q9XVE9	Q9XVE9	equivalent					0	0	0				0		Q20500			1		Q95QY6			1
cel:CELE	C04F12.5	up:Q9XVE8	Q9XVE8	equivalent					0	0	0				0		Q20503			1		Q95QY8			1
cel:CELE	C04F12.7	up:Q9U3R9	Q9U3R9	equivalent					0	0	0				0		Q20507			1		Q95X84			1
cel:CELE	C04F12.8	up:Q9XVE7	Q9XVE7	equivalent					1	0	0	Q9XVE7			1		Q20510			1		Q95X87			1
cel:CELE	C04F12.9	up:Q9XVE6	Q9XVE6	equivalent					0	0	0				0		Q20511			1		Q95XA9			1
cel:CELE	C04F2.1	up:O76661	O76661	equivalent					0	0	0				0		Q20516			1		Q95XC3			1
cel:CELE	C04F2.4	up:O76662	O76662	equivalent					0	0	0				0		Q20519			1		Q95XK8			1
cel:CELE	C04F5.1	up:Q9GZC8	Q9GZC8	equivalent					0	0	0				0		Q20612			1		Q95XN5			1
cel:CELE	C04F5.2	up:Q9GZD6	Q9GZD6	equivalent					0	0	0				0		Q20613			1		Q95XP7			1
cel:CELE	C04F5.3	up:Q9GZD5	Q9GZD5	equivalent					0	0	0				0		Q20652			1		Q95XZ8			1
cel:CELE	C04F5.4	up:Q9GZD4	Q9GZD4	equivalent					0	0	0				0		Q20691			1		Q95Y02			1
cel:CELE	C04F5.5	up:Q7KNQ6	Q7KNQ6	equivalent					0	0	0				0		Q20692			1		Q95Y07			1
cel:CELE	C04F5.6	up:Q9GZD2	Q9GZD2	equivalent					0	0	1			Q9GZD2	1		Q20697			1		Q95Y08			1
cel:CELE	C04F5.7	up:Q9GZD1	Q9GZD1	equivalent					0	0	1			Q9GZD1	1		Q20790			1		Q95Y16			1
cel:CELE	C04F5.8	up:Q9GZD0	Q9GZD0	equivalent					0	0	0				0		Q20791			1		Q95Y17			1
cel:CELE	C04F5.9	up:Q9GZC9	Q9GZC9	equivalent					0	0	0				0		Q20826			1		Q95Y66			1
cel:CELE	C04F6.1	up:P06125	P06125	equivalent					0	0	0				0		Q20866			1		Q95Y68			1
cel:CELE	C04F6.3	up:Q11174	Q11174	equivalent					0	0	0				0		Q20902			1		Q95YA5			1
cel:CELE	C04F6.4	up:Q11176	Q11176	equivalent					0	0	0				0		Q20925			1		Q95YB2			1
cel:CELE	C04F6.5	up:Q11177	Q11177	equivalent					1	0	0	Q11177			1		Q20935			1		Q95YD0			1
cel:CELE	C04F6.7	up:D7SFL1	D7SFL1	equivalent					0	0	0				0		Q20936			1		Q95ZN4			1
cel:CELE	C04G2.1	up:Q17629	Q17629	equivalent					0	0	0				0		Q20939			1		Q95ZP9			1
cel:CELE	C04G2.10	up:C1P643	C1P643	equivalent					0	0	0				0		Q20950			1		Q95ZU7			1
cel:CELE	C04G2.11	up:G5EDS6	G5EDS6	equivalent					0	0	0				0		Q20964			1		Q95ZX6			1
cel:CELE	C04G2.2	up:Q17631	Q17631	equivalent					0	0	0				0		Q21141			1		Q965N5			1
cel:CELE	C04G2.4	up:P05634	P05634	equivalent					0	0	0				0		Q21188			1		Q965T2			1
cel:CELE	C04G2.5	up:Q17628	Q17628	equivalent					0	0	0				0		Q21192			1		Q965W0			1
cel:CELE	C04G2.6	up:Q17632	Q17632	equivalent					0	0	0				0		Q21248			1		Q965W4			1
cel:CELE	C04G2.7	up:G5ED14	G5ED14	equivalent					1	0	0	G5ED14			1		Q21300			1		Q965Z5			1
cel:CELE	C04G2.8	up:Q17626	Q17626	equivalent					0	0	0				0		Q21430			1		Q966A3			1
cel:CELE	C04G2.9	up:Q17633	Q17633	equivalent					0	0	0				0		Q21459			1		Q966A4			1
cel:CELE	C04G6.1	up:H2KYF8	H2KYF8	equivalent					0	0	0				0		Q21464			1		Q966A6			1
cel:CELE	C04G6.10	up:Q95QY1	Q95QY1	equivalent					0	0	0				0		Q21465			1		Q966A9			1
cel:CELE	C04G6.11	up:Q95QY0	Q95QY0	equivalent					0	0	0				0		Q21471			1		Q966B7			1
cel:CELE	C04G6.13	up:A9Z1L4	A9Z1L4	equivalent					0	0	0				0		Q21515			1		Q966B8			1
cel:CELE	C04G6.2	up:A9Z1L3	A9Z1L3	equivalent					0	0	0				0		Q21526			1		Q966H4			1
cel:CELE	C04G6.3	up:G5EDU3	G5EDU3	equivalent					0	0	0				0		Q21544			1		Q966H7			1
cel:CELE	C04G6.4	up:Q17636	Q17636	equivalent					0	0	0				0		Q21552			1		Q966H9			1
cel:CELE	C04G6.5	up:Q17638	Q17638	equivalent					0	0	0				0		Q21556			1		Q968Z1			1
cel:CELE	C04G6.6	up:Q17640	Q17640	equivalent					0	0	0				0		Q21562			1		Q9BIA1			1
cel:CELE	C04G6.7	up:Q17641	Q17641	equivalent					0	0	0				0		Q21574			1		Q9BKS4			1
cel:CELE	C04H4.1	up:Q7YX78	Q7YX78	equivalent					0	0	0				0		Q21645			1		Q9BKX4			1
cel:CELE	C04H5.1	up:O45241	O45241	equivalent					0	0	0				0		Q21653			1		Q9BL10			1
cel:CELE	C04H5.2	up:O62025	O62025	equivalent					0	0	0				0		Q21672			1		Q9BPP2			1
cel:CELE	C04H5.3	up:O62026	O62026	equivalent					0	0	0				0		Q21703			1		Q9GR36			1
cel:CELE	C04H5.6	up:O45244	O45244	equivalent					0	0	0				0		Q21800			1		Q9GUC7			1
cel:CELE	C04H5.7	up:A5Z2V2	A5Z2V2	equivalent					0	0	0				0		Q21801			1		Q9GUC8			1
cel:CELE	C04H5.8	up:Q7YX92	Q7YX92	equivalent					0	0	0				0		Q21816			1		Q9GUC9			1
cel:CELE	C05A2.1	up:G5EC18	G5EC18	equivalent					0	0	0				0		Q21849			1		Q9GUE5			1
cel:CELE	C05A2.4	up:K8F7Y3	K8F7Y3	equivalent					0	0	0				0		Q21855			1		Q9GYI3			1
cel:CELE	C05A9.1	up:Q17645	Q17645	equivalent					0	0	0				0		Q21857			1		Q9GYL3			1
cel:CELE	C05A9.2	up:Q17644	Q17644	equivalent					0	0	0				0		Q21864			1		Q9GYM6			1
cel:CELE	C05B10.1	up:V6CIV8	V6CIV8	equivalent					0	0	0				0		Q21867			1		Q9GYM8			1
cel:CELE	C05B5.1	up:P34289	P34289	equivalent					1	0	0	P34289			1		Q21875			1		Q9GYQ2			1
cel:CELE	C05B5.11	up:A3FPK1	A3FPK1	equivalent					0	0	0				0		Q21941			1		Q9GYR3			1
cel:CELE	C05B5.12	up:D2YW02	D2YW02	equivalent					0	0	0				0		Q21959			1		Q9GYR7			1
cel:CELE	C05B5.16	up:H2L267	H2L267	equivalent					0	0	0				0		Q22042			1		Q9GYU2			1
cel:CELE	C05B5.17	up:H2FLF7	H2FLF7	equivalent					0	0	0				0		Q22060			1		Q9GZF3			1
cel:CELE	C05B5.2	up:P34290	P34290	equivalent					0	0	0				0		Q22085			1		Q9N2S5			1
cel:CELE	C05B5.3	up:P34291	P34291	equivalent					0	0	0				0		Q22128			1		Q9N2U9			1
cel:CELE	C05B5.4	up:P34292	P34292	equivalent					0	0	0				0		Q22219			1		Q9N326			1
cel:CELE	C05B5.5	up:P34293	P34293	equivalent					0	0	1			P34293	1		Q22266			1		Q9N397			1
cel:CELE	C05B5.6	up:P34294	P34294	equivalent					0	0	0				0		Q22288			1		Q9N3D7			1
cel:CELE	C05B5.7	up:D1MN65	D1MN65	equivalent					0	0	0				0		Q22303			1		Q9N3H9			1
cel:CELE	C05B5.8	up:Q86DA7	Q86DA7	equivalent					1	0	0	Q86DA7			1		Q22312			1		Q9N3I0			1
cel:CELE	C05C10.1	up:Q09448	Q09448	equivalent					0	0	0				0		Q22324			1		Q9N3I1			1
cel:CELE	C05C10.2	up:Q95ZZ3	Q95ZZ3	equivalent					0	0	0				0		Q22388			1		Q9N3N3			1
cel:CELE	C05C10.3	up:Q09450	Q09450	equivalent					0	0	0				0		Q22393			1		Q9N3U3			1
cel:CELE	C05C10.4	up:Q09451	Q09451	equivalent					0	0	0				0		Q22396			1		Q9N3V3			1
cel:CELE	C05C10.5	up:Q7JMK4	Q7JMK4	equivalent					0	0	0				0		Q22446			1		Q9N3X9			1
cel:CELE	C05C10.6	up:G5EES6	G5EES6	equivalent					0	0	0				0		Q22508			1		Q9N3Z1			1
cel:CELE	C05C10.7	up:Q8I4N1	Q8I4N1	equivalent					0	0	0				0		Q22537			1		Q9N409			1
cel:CELE	C05C10.8	up:B5BM22	B5BM22	equivalent					0	0	0				0		Q22574			1		Q9N486			1
cel:CELE	C05C12.1	up:Q17651	Q17651	equivalent					0	0	0				0		Q22585			1		Q9N4E0			1
cel:CELE	C05C12.3	up:G5ECM4	G5ECM4	equivalent					0	0	0				0		Q22613			1		Q9N4F0			1
cel:CELE	C05C12.4	up:Q17649	Q17649	equivalent					1	0	0	Q17649			1		Q22631			1		Q9N4G1			1
cel:CELE	C05C12.5	up:Q17648	Q17648	equivalent					0	0	0				0		Q22633			1		Q9N4L1			1
cel:CELE	C05C12.6	up:G5EEY1	G5EEY1	equivalent					0	0	0				0		Q22642			1		Q9N4P0			1
cel:CELE	C05C8.1	up:O16314	O16314	equivalent					0	0	0				0		Q22643			1		Q9N4X2			1
cel:CELE	C05C8.2	up:O16311	O16311	equivalent					0	0	0				0		Q22671			1		Q9N4X7			1
cel:CELE	C05C8.3	up:O16309	O16309	equivalent					0	0	0				0		Q22678			1		Q9N501			1
cel:CELE	C05C8.4	up:O16310	O16310	equivalent					0	0	0				0		Q22715			1		Q9N533			1
cel:CELE	C05C8.5	up:O16312	O16312	equivalent					0	0	0				0		Q22728			1		Q9N591			1
cel:CELE	C05C8.6	up:O16313	O16313	equivalent					0	0	0				0		Q22815			1		Q9N5C4			1
cel:CELE	C05C8.7	up:O16315	O16315	equivalent					0	0	0				0		Q22825			1		Q9N5G3			1
cel:CELE	C05C8.8	up:O16316	O16316	equivalent					1	0	0	O16316			1		Q22853			1		Q9N5G4			1
cel:CELE	C05C8.9	up:Q95X94	Q95X94	equivalent					0	0	0				0		Q22933			1		Q9N5J4			1
cel:CELE	C05C9.1	up:Q17654	Q17654	equivalent					0	0	0				0		Q22971			1		Q9N5N1			1
cel:CELE	C05C9.2	up:Q17655	Q17655	equivalent					0	0	0				0		Q22986			1		Q9N5S7			1
cel:CELE	C05C9.3	up:Q17656	Q17656	equivalent					0	0	0				0		Q22988			1		Q9N5T2			1
cel:CELE	C05D10.1	up:Q11178	Q11178	equivalent					0	0	0				0		Q22989			1		Q9N5U9			1
cel:CELE	C05D10.2	up:Q11179	Q11179	equivalent					0	0	0				0		Q23012			1		Q9N5X6			1
cel:CELE	C05D10.3	up:Q11180	Q11180	equivalent					0	0	0				0		Q23036			1		Q9N5X7			1
cel:CELE	C05D10.4	up:Q11181	Q11181	equivalent					0	0	0				0		Q23151			1		Q9N5Z0			1
cel:CELE	C05D11.1	up:P48053	P48053	equivalent					0	0	0				0		Q23162			1		Q9NA78			1
cel:CELE	C05D11.10	up:Q11189	Q11189	equivalent					0	0	0				0		Q23163			1		Q9NA82			1
cel:CELE	C05D11.11	up:P50432	P50432	equivalent					0	0	0				0		Q23164			1		Q9NA83			1
cel:CELE	C05D11.12	up:Q11190	Q11190	equivalent					0	0	0				0		Q23165			1		Q9NA97			1
cel:CELE	C05D11.13	up:Q11191	Q11191	equivalent					0	0	0				0		Q23189			1		Q9NAB0			1
cel:CELE	C05D11.2	up:Q11182	Q11182	equivalent					0	0	0				0		Q23269			1		Q9NAB1			1
cel:CELE	C05D11.3	up:Q11183	Q11183	equivalent					0	0	0				0		Q23323			1		Q9NAE1			1
cel:CELE	C05D11.4	up:Q11184	Q11184	equivalent					1	0	0	Q11184			1		Q23489			1		Q9NAJ7			1
cel:CELE	C05D11.5	up:Q11185	Q11185	equivalent					0	0	0				0		Q23537			1		Q9NAJ8			1
cel:CELE	C05D11.6	up:D7SFI4	D7SFI4	equivalent					0	0	0				0		Q23553			1		Q9NAM2			1
cel:CELE	C05D11.7	up:Q8T3F2	Q8T3F2	equivalent					0	0	0				0		Q23605			1		Q9NAQ5			1
cel:CELE	C05D11.8	up:Q11187	Q11187	equivalent					0	0	0				0		Q23635			1		Q9NET4			1
cel:CELE	C05D11.9	up:Q11188	Q11188	equivalent					0	0	0				0		Q23650			1		Q9TXK3			1
cel:CELE	C05D12.1	up:Q17661	Q17661	equivalent					0	0	0				0		Q27245			1		Q9TXM4			1
cel:CELE	C05D12.2	up:Q17657	Q17657	equivalent					0	0	0				0		Q27484			1		Q9TXS4			1
cel:CELE	C05D12.3	up:Q2PJ78	Q2PJ78	equivalent					0	0	0				0		Q27504			1		Q9TXT9			1
cel:CELE	C05D12.4	up:Q17658	Q17658	equivalent					0	0	1			Q17658	1		Q27517			1		Q9TXU7			1
cel:CELE	C05D12.5	up:Q17659	Q17659	equivalent					0	0	0				0		Q27520			1		Q9TXZ4			1
cel:CELE	C05D12.7	up:Q5FC75	Q5FC75	equivalent					0	0	0				0		Q27521			1		Q9TXZ6			1
cel:CELE	C05D2.1	up:P50488	P50488	equivalent					0	0	0				0		Q27526			1		Q9TY01			1
cel:CELE	C05D2.10	up:Q95X41	Q95X41	equivalent					0	0	0				0		Q27531			1		Q9TYP0			1
cel:CELE	C05D2.3	up:O45138	O45138	equivalent					0	0	0				0		Q27888			1		Q9TYP9			1
cel:CELE	C05D2.4	up:O45137	O45137	equivalent					0	0	0				0		Q27894			1		Q9TYR0			1
cel:CELE	C05D2.5	up:O45134	O45134	equivalent					0	0	0				0		Q27GT6			1		Q9TYT0			1
cel:CELE	C05D2.6	up:H2KYG5	H2KYG5	equivalent					0	0	0				0		Q2A954			1		Q9TYW7			1
cel:CELE	C05D2.8	up:O45136	O45136	equivalent					0	0	0				0		Q2AAB5			1		Q9TYZ0			1
cel:CELE	C05D9.1	up:Q9GYJ9	Q9GYJ9	equivalent					0	0	0				0		Q2AAB9			1		Q9TZ21			1
cel:CELE	C05D9.2	up:Q9GYK0	Q9GYK0	equivalent					0	0	0				0		Q2L6V7			1		Q9TZ26			1
cel:CELE	C05D9.3	up:Q9GYK2	Q9GYK2	equivalent					0	0	0				0		Q2L6X1			1		Q9TZC6			1
cel:CELE	C05D9.4	up:Q9GYK3	Q9GYK3	equivalent					0	0	0				0		Q2PJ98			1		Q9TZH9			1
cel:CELE	C05D9.5	up:Q22888	Q22888	equivalent					0	0	0				0		Q2V068			1		Q9U1Q5			1
cel:CELE	C05D9.7	up:Q9GYK1	Q9GYK1	equivalent					0	0	0				0		Q2V077			1		Q9U1U1			1
cel:CELE	C05D9.9	up:Q95ZM9	Q95ZM9	equivalent					0	0	0				0		Q2XMY7			1		Q9U1U2			1
cel:CELE	C05E11.1	up:Q17667	Q17667	equivalent					0	0	0				0		Q336L0			1		Q9U1V8			1
cel:CELE	C05E11.2	up:Q17666	Q17666	equivalent					0	0	0				0		Q3Y3Z7			1		Q9U208			1
cel:CELE	C05E11.3	up:L8E7Y1	L8E7Y1	equivalent					0	0	0				0		Q400N4			1		Q9U2D3			1
cel:CELE	C05E11.4	up:P54145	P54145	equivalent					0	0	1			P54145	1		Q45EK2			1		Q9U2D6			1
cel:CELE	C05E11.5	up:Q17663	Q17663	equivalent					1	0	0	Q17663			1		Q4PIT2			1		Q9U2E4			1
cel:CELE	C05E11.6	up:Q17662	Q17662	equivalent					1	0	0	Q17662			1		Q4R104			1		Q9U2F8			1
cel:CELE	C05E11.7	up:Q17665	Q17665	equivalent					0	0	0				0		Q4R111			1		Q9U2J2			1
cel:CELE	C05E11.8	up:G5EBV5	G5EBV5	equivalent					0	0	0				0		Q4R127			1		Q9U2J4			1
cel:CELE	C05E4.1	up:O17365	O17365	equivalent					0	0	0				0		Q4R145			1		Q9U2K4			1
cel:CELE	C05E4.10	up:O17354	O17354	equivalent					0	0	0				0		Q4R165			1		Q9U2W8			1
cel:CELE	C05E4.11	up:O17355	O17355	equivalent					0	0	0				0		Q4R166			1		Q9U301			1
cel:CELE	C05E4.12	up:E4MVD0	E4MVD0	equivalent					0	0	0				0		Q4R169			1		Q9U310			1
cel:CELE	C05E4.13	up:O17361	O17361	equivalent					0	0	0				0		Q4R175			1		Q9U325			1
cel:CELE	C05E4.14	up:A0A0K3ART6	A0A0K3ART6	equivalent					0	0	0				0		Q4TT81			1		Q9U340			1
cel:CELE	C05E4.15	up:A0A0K3AXL9	A0A0K3AXL9	equivalent					0	0	0				0		Q4TTA8			1		Q9U341			1
cel:CELE	C05E4.2	up:A0A0K3ASB3	A0A0K3ASB3	equivalent					0	0	0				0		Q4TTB4			1		Q9U368			1
cel:CELE	C05E4.3	up:G5EE40	G5EE40	equivalent					0	0	0				0		Q4TTC1			1		Q9U384			1
cel:CELE	C05E4.4	up:O17360	O17360	equivalent					0	0	0				0		Q4TTC5			1		Q9U392			1
cel:CELE	C05E4.6	up:O17358	O17358	equivalent					0	0	0				0		Q4TTC8			1		Q9U3E5			1
cel:CELE	C05E4.7	up:O17357	O17357	equivalent					0	0	0				0		Q4W4Z4			1		Q9U3E7			1
cel:CELE	C05E4.9	up:Q10663	Q10663	equivalent					0	0	0				0		Q4W528			1		Q9U3H8			1
cel:CELE	C05E7.1	up:Q9U3R5	Q9U3R5	equivalent					0	0	0				0		Q4W5R9			1		Q9U3I9			1
cel:CELE	C05E7.2	up:Q17670	Q17670	equivalent					0	0	0				0		Q4W5T1			1		Q9U3J9			1
cel:CELE	C05E7.3	up:Q17671	Q17671	equivalent					0	0	0				0		Q4W5T4			1		Q9U3L3			1
cel:CELE	C05E7.4	up:Q17672	Q17672	equivalent					0	0	0				0		Q4ZGE3			1		Q9U3M0			1
cel:CELE	C05G5.1	up:Q17675	Q17675	equivalent					0	0	0				0		Q56VX9			1		Q9U5B9			1
cel:CELE	C05G5.2	up:Q17676	Q17676	equivalent					0	0	0				0		Q58AA1			1		Q9U5C0			1
cel:CELE	C05G5.3	up:Q17677	Q17677	equivalent					1	0	0	Q17677			1		Q5CCI6			1		Q9UAT1			1
cel:CELE	C05G5.4	up:P53596	P53596	equivalent					0	0	0				0		Q5F4U9			1		Q9UAX2			1
cel:CELE	C05G5.5	up:Q17678	Q17678	equivalent					0	0	0				0		Q5WRK8			1		Q9XTR6			1
cel:CELE	C05G5.7	up:A8WHN2	A8WHN2	equivalent					0	0	0				0		Q5WRU4			1		Q9XTR7			1
cel:CELE	C05G6.1	up:Q65CM0	Q65CM0	equivalent					1	0	0	Q65CM0			1		Q629J2			1		Q9XTU3			1
cel:CELE	C05H8.1	up:Q3Y416	Q3Y416	equivalent					0	0	0				0		Q65CM0			1		Q9XU55			1
cel:CELE	C06A1.1	up:P54811	P54811	equivalent					0	0	0				0		Q65XX4			1		Q9XU57			1
cel:CELE	C06A1.2	up:H2FLG7	H2FLG7	equivalent					0	0	0				0		Q6AHP9			1		Q9XU76			1
cel:CELE	C06A1.3	up:P48458	P48458	equivalent					0	0	0				0		Q6BES2			1		Q9XU92			1
cel:CELE	C06A1.5	up:Q17684	Q17684	equivalent					0	0	0				0		Q7JK99			1		Q9XUC9			1
cel:CELE	C06A1.6	up:Q9XVX3	Q9XVX3	equivalent					0	0	0				0		Q7JKM7			1		Q9XUE5			1
cel:CELE	C06A1.7	up:Q565C8	Q565C8	equivalent					0	0	0				0		Q7JNW8			1		Q9XUF6			1
cel:CELE	C06A12.19	up:A0A0K3AUZ8	A0A0K3AUZ8	equivalent					0	0	0				0		Q7KPX2			1		Q9XUG8			1
cel:CELE	C06A12.3	up:Q9XU41	Q9XU41	equivalent					0	0	0				0		Q7YTK3			1		Q9XUH7			1
cel:CELE	C06A12.4	up:Q9XU42	Q9XU42	equivalent					0	0	0				0		Q7YTM6			1		Q9XUH8			1
cel:CELE	C06A12.5	up:Q9XU43	Q9XU43	equivalent					0	0	1			Q9XU43	1		Q7YTQ8			1		Q9XUI4			1
cel:CELE	C06A12.8	up:Q7YTS9	Q7YTS9	equivalent					0	0	0				0		Q7YWM2			1		Q9XUK3			1
cel:CELE	C06A5.1	up:O01483	O01483	equivalent					0	0	0				0		Q7YWU1			1		Q9XUM1			1
cel:CELE	C06A5.11	up:Q95Q89	Q95Q89	equivalent					0	0	0				0		Q7YWV5			1		Q9XUN3			1
cel:CELE	C06A5.12	up:Q4TT80	Q4TT80	equivalent					0	0	0				0		Q7YWW3			1		Q9XUN6			1
cel:CELE	C06A5.2	up:O01480	O01480	equivalent					0	0	0				0		Q7YWW4			1		Q9XUN8			1
cel:CELE	C06A5.3	up:Q5TYK5	Q5TYK5	equivalent					0	0	0				0		Q7YX01			1		Q9XUP2			1
cel:CELE	C06A5.6	up:O01477	O01477	equivalent					0	0	0				0		Q7YX09			1		Q9XUP7			1
cel:CELE	C06A5.7	up:O01479	O01479	equivalent					0	0	0				0		Q7YX16			1		Q9XUP8			1
cel:CELE	C06A5.8	up:O01481	O01481	equivalent					0	0	0				0		Q7YX17			1		Q9XUR7			1
cel:CELE	C06A5.9	up:O01482	O01482	equivalent					0	0	0				0		Q7YX22			1		Q9XUT4			1
cel:CELE	C06A6.2	up:H2KYH8	H2KYH8	equivalent					0	0	0				0		Q7YX36			1		Q9XUV3			1
cel:CELE	C06A6.3	up:Q17687	Q17687	equivalent					0	0	0				0		Q7YX43			1		Q9XUW8			1
cel:CELE	C06A6.4	up:Q17686	Q17686	equivalent					0	0	0				0		Q7YX44			1		Q9XUY8			1
cel:CELE	C06A6.5	up:Q17688	Q17688	equivalent					0	0	0				0		Q7YX56			1		Q9XV35			1
cel:CELE	C06A6.7	up:Q7JP64	Q7JP64	equivalent					0	0	0				0		Q7YX64			1		Q9XV46			1
cel:CELE	C06A8.1	up:Q17693	Q17693	equivalent					0	0	0				0		Q7YX65			1		Q9XV58			1
cel:CELE	C06A8.2	up:Q17694	Q17694	equivalent					0	0	0				0		Q7YX71			1		Q9XV71			1
cel:CELE	C06A8.3	up:Q17698	Q17698	equivalent					0	0	0				0		Q7YX74			1		Q9XV91			1
cel:CELE	C06A8.4	up:G5EGN7	G5EGN7	equivalent					0	0	0				0		Q7YX77			1		Q9XVA3			1
cel:CELE	C06A8.5	up:Q17695	Q17695	equivalent					0	0	0				0		Q7YZW2			1		Q9XVA4			1
cel:CELE	C06A8.6	up:Q17692	Q17692	equivalent					0	0	0				0		Q7Z148			1		Q9XVA8			1
cel:CELE	C06A8.7	up:Q17690	Q17690	equivalent					0	0	0				0		Q7Z1Q6			1		Q9XVA9			1
cel:CELE	C06A8.8	up:Q17691	Q17691	equivalent					0	0	0				0		Q86DA7			1		Q9XVB1			1
cel:CELE	C06A8.9	up:Q17697	Q17697	equivalent					0	0	0				0		Q86ME1			1		Q9XVE1			1
cel:CELE	C06B3.1	up:Q17700	Q17700	equivalent					0	0	0				0		Q86NF6			1		Q9XVE7			1
cel:CELE	C06B3.10	up:Q17709	Q17709	equivalent					0	0	0				0		Q86NH9			1		Q9XVG7			1
cel:CELE	C06B3.11	up:Q17710	Q17710	equivalent					0	0	0				0		Q86S61			1		Q9XVK0			1
cel:CELE	C06B3.12	up:Q58AA2	Q58AA2	equivalent					0	0	0				0		Q8I100			1		Q9XVL3			1
cel:CELE	C06B3.13	up:Q58AA1	Q58AA1	equivalent					1	0	0	Q58AA1			1		Q8I108			1		Q9XVL9			1
cel:CELE	C06B3.14	up:Q58AA0	Q58AA0	equivalent					0	0	0				0		Q8I116			1		Q9XVM4			1
cel:CELE	C06B3.16	up:C4ALD7	C4ALD7	equivalent					0	0	0				0		Q8I4E5			1		Q9XVM6			1
cel:CELE	C06B3.2	up:Q17701	Q17701	equivalent					0	0	0				0		Q8I4L6			1		Q9XVT5			1
cel:CELE	C06B3.3	up:G5ECD0	G5ECD0	equivalent					0	0	1			G5ECD0	1		Q8I7H1			1		Q9XVW1			1
cel:CELE	C06B3.4	up:Q17703	Q17703	equivalent					0	0	0				0		Q8I7K6			1		Q9XW01			1
cel:CELE	C06B3.5	up:Q17704	Q17704	equivalent					0	0	1			Q17704	1		Q8I7M5			1		Q9XW19			1
cel:CELE	C06B3.6	up:Q17705	Q17705	equivalent					0	0	0				0		Q8ITZ2			1		Q9XW26			1
cel:CELE	C06B3.7	up:Q17706	Q17706	equivalent					0	0	0				0		Q8ITZ9			1		Q9XW29			1
cel:CELE	C06B3.8	up:Q6DNF7	Q6DNF7	equivalent					0	0	0				0		Q8MPR4			1		Q9XW97			1
cel:CELE	C06B3.9	up:O62028	O62028	equivalent					0	0	0				0		Q8MPT1			1		Q9XWA0			1
cel:CELE	C06B8.1	up:O17573	O17573	equivalent					0	0	0				0		Q8MPY0			1		Q9XWA4			1
cel:CELE	C06B8.10	up:Q7YTT3	Q7YTT3	equivalent					0	0	0				0		Q8MQ75			1		Q9XWD1			1
cel:CELE	C06B8.11	up:Q7YTR8	Q7YTR8	equivalent					0	0	0				0		Q8MQ78			1		Q9XWH8			1
cel:CELE	C06B8.2	up:G5ECJ3	G5ECJ3	equivalent					0	0	0				0		Q8MQ99			1		Q9XWL5			1
cel:CELE	C06B8.3	up:O17574	O17574	equivalent					0	0	0				0		Q8MQB4			1		Q9XWM1			1
cel:CELE	C06B8.4	up:O17571	O17571	equivalent					0	0	0				0		Q8MXJ5			1		Q9XWM2			1
cel:CELE	C06B8.6	up:O17572	O17572	equivalent					0	0	0				0		Q8MXR1			1		Q9XWM4			1
cel:CELE	C06B8.7	up:O17575	O17575	equivalent					1	0	0	O17575			1		Q8TA47			1		Q9XWN3			1
cel:CELE	C06B8.8	up:O17570	O17570	equivalent					0	0	0				0		Q8WTM1			1		Q9XWP3			1
cel:CELE	C06B8.9	up:Q86D23	Q86D23	equivalent					0	0	0				0		Q93163			1		Q9XWP5			1
cel:CELE	C06C3.1	up:G5EGT0	G5EGT0	equivalent					0	0	0				0		Q93192			1		Q9XWQ8			1
cel:CELE	C06C3.10	up:A5JYR0	A5JYR0	equivalent					0	0	0				0		Q93198			1		Q9XWS3			1
cel:CELE	C06C3.12	up:B7WN68	B7WN68	equivalent					0	0	0				0		Q93206			1		Q9XWW3			1
cel:CELE	C06C3.3	up:Q17711	Q17711	equivalent					0	0	0				0		Q93241			1		Q9XWZ5			1
cel:CELE	C06C3.4	up:Q17717	Q17717	equivalent					0	0	0				0		Q93250			1		Q9XWZ6			1
cel:CELE	C06C3.6	up:Q17713	Q17713	equivalent					0	0	0				0		Q93251			1		Q9XWZ9			1
cel:CELE	C06C3.7	up:Q17714	Q17714	equivalent					0	0	0				0		Q93356			1		Q9XX08			1
cel:CELE	C06C3.8	up:F5GU78	F5GU78	equivalent					0	0	0				0		Q93520			1		Q9XX41			1
cel:CELE	C06C3.9	up:A5JYR1	A5JYR1	equivalent					0	0	0				0		Q93694			1		Q9XXA1			1
cel:CELE	C06C6.1	up:G5EBL0	G5EBL0	equivalent					0	0	0				0		Q93695			1		Q9XXC0			1
cel:CELE	C06C6.2	up:O62030	O62030	equivalent					0	0	0				0		Q93696			1		Q9XXC1			1
cel:CELE	C06C6.3	up:O62029	O62029	equivalent					0	0	0				0		Q93697			1		Q9XXE9			1
cel:CELE	C06C6.4	up:O62034	O62034	equivalent					1	0	0	O62034			1		Q93781			1		Q9XXF1			1
cel:CELE	C06C6.5	up:O62031	O62031	equivalent					0	0	0				0		Q93832			1		Q9XXF9			1
cel:CELE	C06C6.6	up:O62032	O62032	equivalent					0	0	0				0		Q94056			1		Q9XXG5			1
cel:CELE	C06C6.7	up:O62033	O62033	equivalent					0	0	0				0		Q94075			1		Q9XXH0			1
cel:CELE	C06C6.8	up:O62035	O62035	equivalent					0	0	0				0		Q94168			1		Q9XXJ4			1
cel:CELE	C06C6.9	up:O62036	O62036	equivalent					0	0	0				0		Q94176			1		Q9XXJ5			1
cel:CELE	C06E1.1	up:P34296	P34296	equivalent					0	0	0				0		Q94259			1		Q9XXR8			1
cel:CELE	C06E1.10	up:P34305	P34305	equivalent					0	0	0				0		Q94314			1		Q9XXS3			1
cel:CELE	C06E1.11	up:P34306	P34306	equivalent					0	0	0				0		Q95011			1		Q9XXS6			1
cel:CELE	C06E1.3	up:P34298	P34298	equivalent					0	0	0				0		Q95Q05			1		Q9XXT5			1
cel:CELE	C06E1.4	up:P34299	P34299	equivalent					0	0	0				0		Q95QB3			1		Q9XXU5			1
cel:CELE	C06E1.5	up:P34300	P34300	equivalent					0	0	0				0		Q95QF1			1		S6F568			1
cel:CELE	C06E1.6	up:P34301	P34301	equivalent					0	0	0				0		Q95QL1			1		U4PAN8			1
cel:CELE	C06E1.7	up:P34302	P34302	equivalent					0	0	0				0		Q95QL4			1		U4PF33			1
cel:CELE	C06E1.8	up:P34303	P34303	equivalent					0	0	0				0		Q95QY6			1		U4PSA1			1
cel:CELE	C06E1.9	up:P34304	P34304	equivalent					0	0	0				0		Q95QY8			1		V6CKQ7			1
cel:CELE	C06E2.1	up:Q17721	Q17721	equivalent					0	0	0				0		Q95X84			1		V6CLE4			1
cel:CELE	C06E2.2	up:Q17722	Q17722	equivalent					0	0	0				0		Q95X87			1		V6CLQ0			1
cel:CELE	C06E2.3	up:P52484	P52484	equivalent					0	0	0				0		Q95XA9			1		W6SBJ5			1
cel:CELE	C06E2.5	up:Q17719	Q17719	equivalent					0	0	0				0		Q95XC3			1		X5LQ00			1
cel:CELE	C06E2.7	up:Q17720	Q17720	equivalent					0	0	0				0		Q95XN5			1		X5LQ17			1
cel:CELE	C06E2.8	up:Q7JP91	Q7JP91	equivalent					0	0	0				0		Q95XP7			1
cel:CELE	C06E2.9	up:Q4PIW4	Q4PIW4	equivalent					0	0	0				0		Q95XZ8			1
cel:CELE	C06E4.1	up:Q17729	Q17729	equivalent					0	0	0				0		Q95Y02			1
cel:CELE	C06E4.2	up:V6CLG3	V6CLG3	equivalent					0	0	0				0		Q95Y07			1
cel:CELE	C06E4.3	up:Q17726	Q17726	equivalent					0	0	1			Q17726	1		Q95Y08			1
cel:CELE	C06E4.5	up:Q17723	Q17723	equivalent					0	0	0				0		Q95Y16			1
cel:CELE	C06E4.6	up:Q17724	Q17724	equivalent					0	0	1			Q17724	1		Q95Y17			1
cel:CELE	C06E4.7	up:Q17727	Q17727	equivalent					0	0	0				0		Q95Y66			1
cel:CELE	C06E4.8	up:Q17730	Q17730	equivalent					0	0	0				0		Q95Y68			1
cel:CELE	C06E7.1	up:P50305	P50305	equivalent					0	0	0				0		Q95YA5			1
cel:CELE	C06E7.2	up:Q17731	Q17731	equivalent					0	0	0				0		Q95YB2			1
cel:CELE	C06E7.3	up:P50306	P50306	equivalent					0	0	0				0		Q95YD0			1
cel:CELE	C06E7.4	up:Q17732	Q17732	equivalent					0	0	0				0		Q95ZN4			1
cel:CELE	C06E7.6	up:P54218	P54218	equivalent					0	0	0				0		Q95ZP9			1
cel:CELE	C06E7.7	up:Q17734	Q17734	equivalent					0	0	0				0		Q95ZU7			1
cel:CELE	C06E7.88	up:C4RVF5	C4RVF5	equivalent					0	0	0				0		Q95ZX6			1
cel:CELE	C06E8.3	up:K8ESD7	K8ESD7	equivalent					0	0	0				0		Q965N5			1
cel:CELE	C06E8.5	up:Q17738	Q17738	equivalent					0	0	1			Q17738	1		Q965T2			1
cel:CELE	C06G1.1	up:A8WFJ7	A8WFJ7	equivalent					0	0	0				0		Q965W0			1
cel:CELE	C06G1.2	up:Q17742	Q17742	equivalent					0	0	0				0		Q965Z5			1
cel:CELE	C06G1.4	up:Q17740	Q17740	equivalent					0	0	0				0		Q966A3			1
cel:CELE	C06G1.5	up:H8W3X6	H8W3X6	equivalent					0	0	0				0		Q966A4			1
cel:CELE	C06G1.6	up:B1Q237	B1Q237	equivalent					0	0	0				0		Q966A6			1
cel:CELE	C06G3.1	up:Q86PJ4	Q86PJ4	equivalent					0	0	0				0		Q966A9			1
cel:CELE	C06G3.10	up:Q21444	Q21444	equivalent					0	0	0				0		Q966H4			1
cel:CELE	C06G3.11	up:Q17754	Q17754	equivalent					0	0	0				0		Q966H7			1
cel:CELE	C06G3.2	up:G5EBX0	G5EBX0	equivalent					0	0	0				0		Q966H9			1
cel:CELE	C06G3.3	up:Q17751	Q17751	equivalent					0	0	0				0		Q968Z1			1
cel:CELE	C06G3.5	up:H2KYI5	H2KYI5	equivalent					0	0	0				0		Q9BIA1			1
cel:CELE	C06G3.6	up:Q17746	Q17746	equivalent					1	0	0	Q17746			1		Q9BKS4			1
cel:CELE	C06G3.7	up:Q17745	Q17745	equivalent					0	0	0				0		Q9BKX4			1
cel:CELE	C06G3.8	up:Q17749	Q17749	equivalent					0	0	0				0		Q9BL10			1
cel:CELE	C06G3.9	up:Q17750	Q17750	equivalent					0	0	0				0		Q9BPP2			1
cel:CELE	C06G4.1	up:P34307	P34307	equivalent					0	0	0				0		Q9GR36			1
cel:CELE	C06G4.2	up:P34308	P34308	equivalent					0	0	0				0		Q9GUC7			1
cel:CELE	C06G4.4	up:P34310	P34310	equivalent					0	0	0				0		Q9GUC8			1
cel:CELE	C06G4.5	up:P34311	P34311	equivalent					0	0	0				0		Q9GUC9			1
cel:CELE	C06G4.6	up:Q4PJ09	Q4PJ09	equivalent					0	0	0				0		Q9GUE5			1
cel:CELE	C06G8.1	up:Q17757	Q17757	equivalent					1	0	0	Q17757			1		Q9GYI3			1
cel:CELE	C06G8.2	up:Q17758	Q17758	equivalent					0	0	0				0		Q9GYL3			1
cel:CELE	C06G8.3	up:Q6BEU0	Q6BEU0	equivalent					0	0	0				0		Q9GYM6			1
cel:CELE	C06G8.4	up:Q17760	Q17760	equivalent					0	0	0				0		Q9GYM8			1
cel:CELE	C06H2.1	up:Q17763	Q17763	equivalent					0	0	0				0		Q9GYQ2			1
cel:CELE	C06H2.2	up:Q17764	Q17764	equivalent					0	0	0				0		Q9GYR3			1
cel:CELE	C06H2.3	up:Q17765	Q17765	equivalent					0	0	0				0		Q9GYU2			1
cel:CELE	C06H2.4	up:Q17766	Q17766	equivalent					0	0	0				0		Q9GZF3			1
cel:CELE	C06H2.5	up:B6EU62	B6EU62	equivalent					0	0	0				0		Q9N2S5			1
cel:CELE	C06H2.6	up:Q8WQG5	Q8WQG5	equivalent					0	0	0				0		Q9N2U9			1
cel:CELE	C06H2.7	up:I2HAA3	I2HAA3	equivalent					0	0	0				0		Q9N326			1
cel:CELE	C06H5.1	up:O17577	O17577	equivalent					1	0	0	O17577			1		Q9N397			1
cel:CELE	C06H5.11	up:G1K0Z8	G1K0Z8	equivalent					0	0	0				0		Q9N3D7			1
cel:CELE	C06H5.12	up:I2HAK7	I2HAK7	equivalent					0	0	0				0		Q9N3H9			1
cel:CELE	C06H5.13	up:I2HAK8	I2HAK8	equivalent					0	0	0				0		Q9N3I0			1
cel:CELE	C06H5.14	up:I2HAK8	I2HAK8	equivalent					0	0	0				0		Q9N3I1			1
cel:CELE	C06H5.2	up:O17578	O17578	equivalent					1	0	0	O17578			1		Q9N3N3			1
cel:CELE	C06H5.6	up:G5EDA7	G5EDA7	equivalent					0	0	0				0		Q9N3U3			1
cel:CELE	C06H5.7	up:G5EDI0	G5EDI0	equivalent					0	0	0				0		Q9N3V3			1
cel:CELE	C06H5.8	up:G5EEQ2	G5EEQ2	equivalent					1	0	0	G5EEQ2			1		Q9N3X9			1
cel:CELE	C07A12.1	up:H2KYH4	H2KYH4	equivalent					0	0	0				0		Q9N3Z1			1
cel:CELE	C07A12.18	up:H2KYH6	H2KYH6	equivalent					0	0	0				0		Q9N409			1
cel:CELE	C07A12.2	up:Q17772	Q17772	equivalent					1	0	0	Q17772			1		Q9N486			1
cel:CELE	C07A12.3	up:Q17771	Q17771	equivalent					0	0	0				0		Q9N4E0			1
cel:CELE	C07A12.4	up:Q17770	Q17770	equivalent					0	0	0				0		Q9N4F0			1
cel:CELE	C07A12.5	up:Q17768	Q17768	equivalent					0	0	0				0		Q9N4G1			1
cel:CELE	C07A12.7	up:H2KYH5	H2KYH5	equivalent					0	0	0				0		Q9N4L1			1
cel:CELE	C07A4.1	up:Q93194	Q93194	equivalent					0	0	0				0		Q9N4X2			1
cel:CELE	C07A4.2	up:Q93192	Q93192	equivalent					1	0	0	Q93192			1		Q9N4X7			1
cel:CELE	C07A4.3	up:Q93193	Q93193	equivalent					0	0	0				0		Q9N501			1
cel:CELE	C07A9.1	up:P34312	P34312	equivalent					0	0	0				0		Q9N533			1
cel:CELE	C07A9.10	up:P34321	P34321	equivalent					0	0	0				0		Q9N591			1
cel:CELE	C07A9.11	up:P34322	P34322	equivalent					0	0	0				0		Q9N5C4			1
cel:CELE	C07A9.12	up:Q5CZ51	Q5CZ51	equivalent					0	0	0				0		Q9N5G3			1
cel:CELE	C07A9.13	up:Q565D5	Q565D5	equivalent					0	0	0				0		Q9N5J4			1
cel:CELE	C07A9.2	up:P34313	P34313	equivalent					0	0	0				0		Q9N5N1			1
cel:CELE	C07A9.3	up:P34314	P34314	equivalent					0	0	0				0		Q9N5S7			1
cel:CELE	C07A9.4	up:P34315	P34315	equivalent					0	0	0				0		Q9N5U9			1
cel:CELE	C07A9.5	up:P34316	P34316	equivalent					0	0	0				0		Q9N5X6			1
cel:CELE	C07A9.6	up:P34317	P34317	equivalent					0	0	0				0		Q9N5X7			1
cel:CELE	C07A9.7	up:P34318	P34318	equivalent					0	0	0				0		Q9N5Z0			1
cel:CELE	C07A9.8	up:P34319	P34319	equivalent					0	0	0				0		Q9NA78			1
cel:CELE	C07A9.9	up:P34320	P34320	equivalent					1	0	0	P34320			1		Q9NA82			1
cel:CELE	C07B5.2	up:Q17775	Q17775	equivalent					0	0	0				0		Q9NA83			1
cel:CELE	C07B5.3	up:Q17776	Q17776	equivalent					0	0	0				0		Q9NAB0			1
cel:CELE	C07B5.4	up:Q17777	Q17777	equivalent					0	0	0				0		Q9NAB1			1
cel:CELE	C07B5.5	up:Q17778	Q17778	equivalent					0	0	0				0		Q9NAE1			1
cel:CELE	C07B5.6	up:O62038	O62038	equivalent					0	0	0				0		Q9NAJ7			1
cel:CELE	C07B5.8	up:E0AHA8	E0AHA8	equivalent					0	0	0				0		Q9NAM2			1
cel:CELE	C07C7.1	up:Q17779	Q17779	equivalent					0	0	0				0		Q9NAQ5			1
cel:CELE	C07C7.3	up:U4PBY8	U4PBY8	equivalent					0	0	0				0		Q9NET4			1
cel:CELE	C07D10.1	up:Q17783	Q17783	equivalent					0	0	0				0		Q9TXK3			1
cel:CELE	C07D10.2	up:H2KYJ3	H2KYJ3	equivalent					0	0	0				0		Q9TXM4			1
cel:CELE	C07D10.3	up:Q17781	Q17781	equivalent					0	0	0				0		Q9TXS4			1
cel:CELE	C07D10.4	up:P55113	P55113	equivalent					1	0	0	P55113			1		Q9TXT9			1
cel:CELE	C07D10.5	up:Q17780	Q17780	equivalent					0	0	0				0		Q9TXU7			1
cel:CELE	C07D10.6	up:Q2V4X1	Q2V4X1	equivalent					0	0	0				0		Q9TY01			1
cel:CELE	C07D8.5	up:P91021	P91021	equivalent					0	0	0				0		Q9TYP0			1
cel:CELE	C07D8.6	up:P91020	P91020	equivalent					0	0	0				0		Q9TYP9			1
cel:CELE	C07E3.1	up:Q17784	Q17784	equivalent					0	0	0				0		Q9TYR0			1
cel:CELE	C07E3.10	up:O17579	O17579	equivalent					0	0	0				0		Q9TYT0			1
cel:CELE	C07E3.2	up:O17580	O17580	equivalent					0	0	0				0		Q9TYW7			1
cel:CELE	C07E3.3	up:Q17786	Q17786	equivalent					0	0	0				0		Q9TYZ0			1
cel:CELE	C07E3.4	up:Q17787	Q17787	equivalent					0	0	0				0		Q9TZ21			1
cel:CELE	C07E3.5	up:Q17788	Q17788	equivalent					0	0	0				0		Q9TZ26			1
cel:CELE	C07E3.6	up:Q17792	Q17792	equivalent					0	0	0				0		Q9TZC6			1
cel:CELE	C07E3.8	up:Q17791	Q17791	equivalent					0	0	0				0		Q9TZH9			1
cel:CELE	C07E3.9	up:Q17790	Q17790	equivalent					0	0	0				0		Q9U1Q5			1
cel:CELE	C07F11.1	up:Q9N5Z3	Q9N5Z3	equivalent					0	0	0				0		Q9U1U1			1
cel:CELE	C07F11.2	up:Q9N5Z4	Q9N5Z4	equivalent					0	0	0				0		Q9U1U2			1
cel:CELE	C07G1.1	up:Q17800	Q17800	equivalent					0	0	0				0		Q9U1V8			1
cel:CELE	C07G1.15	up:U4PMJ4	U4PMJ4	equivalent					0	0	0				0		Q9U208			1
cel:CELE	C07G1.3	up:Q8I7M8	Q8I7M8	equivalent					0	0	0				0		Q9U2D3			1
cel:CELE	C07G1.4	up:Q17795	Q17795	equivalent					0	0	0				0		Q9U2D6			1
cel:CELE	C07G1.5	up:Q17796	Q17796	equivalent					0	0	0				0		Q9U2F8			1
cel:CELE	C07G1.6	up:Q17798	Q17798	equivalent					0	0	0				0		Q9U2J2			1
cel:CELE	C07G1.7	up:Q17799	Q17799	equivalent					0	0	0				0		Q9U2J4			1
cel:CELE	C07G1.8	up:Q3Y400	Q3Y400	equivalent					0	0	0				0		Q9U2K4			1
cel:CELE	C07G2.1	up:Q17802	Q17802	equivalent					0	0	0				0		Q9U2W8			1
cel:CELE	C07G2.2	up:Q9U3R1	Q9U3R1	equivalent					0	0	0				0		Q9U301			1
cel:CELE	C07G2.3	up:P47209	P47209	equivalent					0	0	0				0		Q9U310			1
cel:CELE	C07G3.10	up:Q965N0	Q965N0	equivalent					0	0	0				0		Q9U325			1
cel:CELE	C07G3.2	up:O16327	O16327	equivalent					1	0	0	O16327			1		Q9U340			1
cel:CELE	C07G3.3	up:O16326	O16326	equivalent					0	0	0				0		Q9U341			1
cel:CELE	C07G3.4	up:O16325	O16325	equivalent					0	0	0				0		Q9U368			1
cel:CELE	C07G3.5	up:O16324	O16324	equivalent					0	0	0				0		Q9U384			1
cel:CELE	C07G3.6	up:O16323	O16323	equivalent					0	0	0				0		Q9U392			1
cel:CELE	C07G3.8	up:O16321	O16321	equivalent					0	0	0				0		Q9U3H8			1
cel:CELE	C07G3.9	up:O16322	O16322	equivalent					0	0	0				0		Q9U3I9			1
cel:CELE	C07H4.1	up:A0A078BS54	A0A078BS54	equivalent					1	0	0	A0A078BS54			1		Q9U3J9			1
cel:CELE	C07H4.2	up:G5EGT4	G5EGT4	equivalent					0	0	0				0		Q9U3L3			1
cel:CELE	C07H6.1	up:Q95YE6	Q95YE6	equivalent					0	0	0				0		Q9U3M0			1
cel:CELE	C07H6.2	up:Q95YE7	Q95YE7	equivalent					0	0	0				0		Q9U5B9			1
cel:CELE	C07H6.3	up:Q95YF0	Q95YF0	equivalent					0	0	0				0		Q9U5C0			1
cel:CELE	C07H6.4	up:Q95YF1	Q95YF1	equivalent					0	0	0				0		Q9UAX2			1
cel:CELE	C07H6.5	up:Q95YF3	Q95YF3	equivalent					0	0	0				0		Q9XTR6			1
cel:CELE	C07H6.6	up:Q95YE9	Q95YE9	equivalent					0	0	0				0		Q9XTR7			1
cel:CELE	C07H6.7	up:P34684	P34684	equivalent					0	0	0				0		Q9XTU3			1
cel:CELE	C07H6.8	up:Q95YE8	Q95YE8	equivalent					0	0	0				0		Q9XU57			1
cel:CELE	C07H6.9	up:A0A078BS77	A0A078BS77	equivalent					0	0	0				0		Q9XU76			1
cel:CELE	C08A9.1	up:P41977	P41977	equivalent					0	0	0				0		Q9XU92			1
cel:CELE	C08A9.10	up:Q27GT6	Q27GT6	equivalent					1	0	0	Q27GT6			1		Q9XUC9			1
cel:CELE	C08A9.3	up:D1MN44	D1MN44	equivalent					0	0	0				0		Q9XUE5			1
cel:CELE	C08A9.6	up:Q17809	Q17809	equivalent					0	0	0				0		Q9XUF6			1
cel:CELE	C08A9.7	up:Q17810	Q17810	equivalent					0	0	0				0		Q9XUG8			1
cel:CELE	C08A9.8	up:Q17811	Q17811	equivalent					0	0	0				0		Q9XUI4			1
cel:CELE	C08A9.9	up:Q17812	Q17812	equivalent					1	0	0	Q17812			1		Q9XUK3			1
cel:CELE	C08B11.1	up:P21541	P21541	equivalent					1	0	0	P21541			1		Q9XUM1			1
cel:CELE	C08B11.2	up:Q09440	Q09440	equivalent					0	0	0				0		Q9XUN3			1
cel:CELE	C08B11.3	up:Q09441	Q09441	equivalent					0	0	0				0		Q9XUN6			1
cel:CELE	C08B11.4	up:Q09225	Q09225	equivalent					0	0	0				0		Q9XUN8			1
cel:CELE	C08B11.5	up:Q09442	Q09442	equivalent					0	0	0				0		Q9XUP2			1
cel:CELE	C08B11.6	up:Q09443	Q09443	equivalent					0	0	0				0		Q9XUP7			1
cel:CELE	C08B11.7	up:Q09444	Q09444	equivalent					0	0	0				0		Q9XUP8			1
cel:CELE	C08B11.8	up:Q09226	Q09226	equivalent					0	0	0				0		Q9XUR7			1
cel:CELE	C08B11.9	up:Q09227	Q09227	equivalent					0	0	0				0		Q9XUT4			1
cel:CELE	C08B6.1	up:Q17813	Q17813	equivalent					0	0	0				0		Q9XUV3			1
cel:CELE	C08B6.10	up:Q17821	Q17821	equivalent					0	0	0				0		Q9XUW8			1
cel:CELE	C08B6.11	up:Q8MQE5	Q8MQE5	equivalent					0	0	0				0		Q9XUY8			1
cel:CELE	C08B6.12	up:Q7YTS7	Q7YTS7	equivalent					0	0	0				0		Q9XV35			1
cel:CELE	C08B6.13	up:Q5FC58	Q5FC58	equivalent					0	0	0				0		Q9XV46			1
cel:CELE	C08B6.14	up:G5EGR0	G5EGR0	equivalent					0	0	0				0		Q9XV58			1
cel:CELE	C08B6.2	up:E2JKZ3	E2JKZ3	equivalent					0	0	1			E2JKZ3	1		Q9XV71			1
cel:CELE	C08B6.3	up:Q17815	Q17815	equivalent					0	0	0				0		Q9XVA3			1
cel:CELE	C08B6.4	up:Q65ZB0	Q65ZB0	equivalent					0	0	0				0		Q9XVA4			1
cel:CELE	C08B6.5	up:Q17817	Q17817	equivalent					0	0	0				0		Q9XVA8			1
cel:CELE	C08B6.6	up:Q17822	Q17822	equivalent					0	0	0				0		Q9XVA9			1
cel:CELE	C08B6.7	up:D9N129	D9N129	equivalent					0	0	0				0		Q9XVB1			1
cel:CELE	C08B6.8	up:Q17819	Q17819	equivalent					0	0	0				0		Q9XVE1			1
cel:CELE	C08B6.9	up:Q17820	Q17820	equivalent					0	0	0				0		Q9XVE7			1
cel:CELE	C08C3.1	up:P17486	P17486	equivalent					0	0	0				0		Q9XVG7			1
cel:CELE	C08C3.2	up:P34324	P34324	equivalent					0	0	0				0		Q9XVK0			1
cel:CELE	C08C3.3	up:P10038	P10038	equivalent					1	0	0	P10038			1		Q9XVL3			1
cel:CELE	C08C3.4	up:P34325	P34325	equivalent					0	0	0				0		Q9XVL9			1
cel:CELE	C08D8.1	up:Q17824	Q17824	equivalent					0	0	0				0		Q9XVM4			1
cel:CELE	C08D8.2	up:H2KYK4	H2KYK4	equivalent					0	0	0				0		Q9XVM6			1
cel:CELE	C08D8.7	up:U4PLX7	U4PLX7	equivalent					0	0	0				0		Q9XVT5			1
cel:CELE	C08E3.1	up:G5EDK7	G5EDK7	equivalent					1	0	0	G5EDK7			1		Q9XVW1			1
cel:CELE	C08E3.10	up:G4RXG5	G4RXG5	equivalent					0	0	0				0		Q9XW01			1
cel:CELE	C08E3.12	up:O17203	O17203	equivalent					0	0	0				0		Q9XW19			1
cel:CELE	C08E3.13	up:G5EDK7	G5EDK7	equivalent					1	0	0	G5EDK7			1		Q9XW26			1
cel:CELE	C08E3.14	up:Q4W507	Q4W507	equivalent					0	0	0				0		Q9XW29			1
cel:CELE	C08E3.15	up:Q4W506	Q4W506	equivalent					0	0	0				0		Q9XW97			1
cel:CELE	C08E3.3	up:O17193	O17193	equivalent					0	0	0				0		Q9XWA0			1
cel:CELE	C08E3.6	up:O17196	O17196	equivalent					1	0	0	O17196			1		Q9XWA4			1
cel:CELE	C08E3.7	up:O17198	O17198	equivalent					1	0	0	O17198			1		Q9XWD1			1
cel:CELE	C08E3.8	up:O17199	O17199	equivalent					0	0	0				0		Q9XWH8			1
cel:CELE	C08E3.9	up:O17200	O17200	equivalent					0	0	0				0		Q9XWL5			1
cel:CELE	C08E8.1	up:O62039	O62039	equivalent					0	0	0				0		Q9XWM1			1
cel:CELE	C08E8.10	up:B2D6P7	B2D6P7	equivalent					0	0	0				0		Q9XWM2			1
cel:CELE	C08E8.11	up:B5U8N7	B5U8N7	equivalent					0	0	0				0		Q9XWM4			1
cel:CELE	C08E8.2	up:O62040	O62040	equivalent					0	0	0				0		Q9XWN3			1
cel:CELE	C08E8.3	up:O62042	O62042	equivalent					0	0	0				0		Q9XWP3			1
cel:CELE	C08E8.4	up:G5EFJ3	G5EFJ3	equivalent					1	0	0	G5EFJ3			1		Q9XWP5			1
cel:CELE	C08E8.5	up:Q7YX98	Q7YX98	equivalent					0	0	0				0		Q9XWQ8			1
cel:CELE	C08E8.6	up:Q7YX97	Q7YX97	equivalent					0	0	0				0		Q9XWS3			1
cel:CELE	C08E8.9	up:A8DZ46	A8DZ46	equivalent					0	0	0				0		Q9XWW3			1
cel:CELE	C08F1.1	up:O17179	O17179	equivalent					0	0	0				0		Q9XWZ5			1
cel:CELE	C08F1.10	up:Q8MXJ2	Q8MXJ2	equivalent					0	0	0				0		Q9XWZ6			1
cel:CELE	C08F1.11	up:Q4W511	Q4W511	equivalent					0	0	0				0		Q9XWZ9			1
cel:CELE	C08F1.3	up:O17178	O17178	equivalent					0	0	0				0		Q9XX41			1
cel:CELE	C08F1.4	up:H2KYK5	H2KYK5	equivalent					0	0	0				0		Q9XXA1			1
cel:CELE	C08F1.5	up:H2KYK6	H2KYK6	equivalent					0	0	0				0		Q9XXC0			1
cel:CELE	C08F1.6	up:O17177	O17177	equivalent					0	0	0				0		Q9XXC1			1
cel:CELE	C08F1.8	up:O17181	O17181	equivalent					0	0	0				0		Q9XXE9			1
cel:CELE	C08F11.1	up:Q9U3Q9	Q9U3Q9	equivalent					0	0	0				0		Q9XXF9			1
cel:CELE	C08F11.10	up:O62052	O62052	equivalent					0	0	0				0		Q9XXG5			1
cel:CELE	C08F11.11	up:O62053	O62053	equivalent					0	0	0				0		Q9XXJ4			1
cel:CELE	C08F11.12	up:Q9U3R0	Q9U3R0	equivalent					0	0	0				0		Q9XXJ5			1
cel:CELE	C08F11.13	up:O62054	O62054	equivalent					0	0	0				0		Q9XXR8			1
cel:CELE	C08F11.17	up:A0FLS3	A0FLS3	equivalent					0	0	0				0		Q9XXS3			1
cel:CELE	C08F11.3	up:O62049	O62049	equivalent					0	0	0				0		Q9XXS6			1
cel:CELE	C08F11.4	up:O62050	O62050	equivalent					0	0	0				0		Q9XXT5			1
cel:CELE	C08F11.5	up:Q9U3Q8	Q9U3Q8	equivalent					0	0	0				0		Q9XXU5			1
cel:CELE	C08F11.7	up:Q9U3Q7	Q9U3Q7	equivalent					0	0	0				0		S6F568			1
cel:CELE	C08F11.8	up:Q9U3Q6	Q9U3Q6	equivalent					0	1	1		Q9U3Q6	Q9U3Q6	2		U4PAN8			1
cel:CELE	C08F11.9	up:O62051	O62051	equivalent					0	0	0				0		U4PF33			1
cel:CELE	C08F8.1	up:Q17827	Q17827	equivalent					0	0	0				0		U4PSA1			1
cel:CELE	C08F8.15	up:G3MU12	G3MU12	equivalent					0	0	0				0		V6CKQ7			1
cel:CELE	C08F8.2	up:Q17828	Q17828	equivalent					0	0	0				0		V6CLE4			1
cel:CELE	C08F8.3	up:S6FN37	S6FN37	equivalent					0	0	0				0		V6CLQ0			1
cel:CELE	C08F8.4	up:H9G2W6	H9G2W6	equivalent					0	0	0				0		W6SBJ5			1
cel:CELE	C08F8.5	up:Q17830	Q17830	equivalent					0	0	0				0		X5LQ00			1
cel:CELE	C08F8.6	up:Q17825	Q17825	equivalent					0	0	0				0		X5LQ17			1
cel:CELE	C08F8.7	up:O01312	O01312	equivalent					0	0	0				0
cel:CELE	C08F8.8	up:Q9XVV3	Q9XVV3	equivalent					0	0	0				0
cel:CELE	C08F8.9	up:Q7YX96	Q7YX96	equivalent					0	0	0				0
cel:CELE	C08G5.2	up:Q9TZL5	Q9TZL5	equivalent					0	0	0				0
cel:CELE	C08G5.4	up:G4RXP2	G4RXP2	equivalent					0	0	0				0
cel:CELE	C08G5.6	up:Q9TZL1	Q9TZL1	equivalent					0	0	0				0
cel:CELE	C08G5.7	up:Q4W4Y6	Q4W4Y6	equivalent					0	0	0				0
cel:CELE	C08G9.1	up:Q8MXJ0	Q8MXJ0	equivalent					0	0	0				0
cel:CELE	C08G9.2	up:O44131	O44131	equivalent					0	0	0				0
cel:CELE	C08H9.1	up:P52714	P52714	equivalent					0	0	0				0
cel:CELE	C08H9.10	up:Q17834	Q17834	equivalent					0	0	0				0
cel:CELE	C08H9.11	up:Q17835	Q17835	equivalent					0	0	0				0
cel:CELE	C08H9.12	up:Q17836	Q17836	equivalent					0	0	0				0
cel:CELE	C08H9.13	up:Q17839	Q17839	equivalent					0	0	0				0
cel:CELE	C08H9.14	up:Q17840	Q17840	equivalent					0	0	0				0
cel:CELE	C08H9.15	up:Q7YX93	Q7YX93	equivalent					0	0	0				0
cel:CELE	C08H9.16	up:B5BM26	B5BM26	equivalent					0	0	0				0
cel:CELE	C08H9.18	up:E9P858	E9P858	equivalent					0	0	0				0
cel:CELE	C08H9.2	up:B3GWB2	B3GWB2	equivalent					0	0	0				0
cel:CELE	C08H9.3	up:P52887	P52887	equivalent					0	0	0				0
cel:CELE	C08H9.4	up:Q14V32	Q14V32	equivalent					0	0	0				0
cel:CELE	C08H9.5	up:Q17833	Q17833	equivalent					0	0	0				0
cel:CELE	C08H9.6	up:Q17841	Q17841	equivalent					0	0	0				0
cel:CELE	C08H9.7	up:Q17837	Q17837	equivalent					1	0	0	Q17837			1
cel:CELE	C09B7.1	up:Q22895	Q22895	equivalent					0	0	0				0
cel:CELE	C09B7.2	up:Q22894	Q22894	equivalent					0	0	0				0
cel:CELE	C09B8.1	up:Q17848	Q17848	equivalent					0	0	0				0
cel:CELE	C09B8.3	up:Q17845	Q17845	equivalent					0	0	0				0
cel:CELE	C09B8.4	up:Q17846	Q17846	equivalent					1	1	0	Q17846	Q17846		2
cel:CELE	C09B8.5	up:Q17847	Q17847	equivalent					1	0	0	Q17847			1
cel:CELE	C09B8.6	up:Q17849	Q17849	equivalent					0	0	0				0
cel:CELE	C09B8.7	up:Q17850	Q17850	equivalent					0	0	0				0
cel:CELE	C09B8.8	up:Q8WQG3	Q8WQG3	equivalent					0	0	1			Q8WQG3	1
cel:CELE	C09B9.1	up:Q17854	Q17854	equivalent					0	0	0				0
cel:CELE	C09B9.2	up:Q17852	Q17852	equivalent					0	0	0				0
cel:CELE	C09B9.3	up:Q17851	Q17851	equivalent					0	0	0				0
cel:CELE	C09B9.4	up:Q17853	Q17853	equivalent					0	0	0				0
cel:CELE	C09B9.6	up:Q17856	Q17856	equivalent					0	0	0				0
cel:CELE	C09B9.7	up:P90742	P90742	equivalent					0	0	0				0
cel:CELE	C09B9.8	up:V6CLR3	V6CLR3	equivalent					0	0	0				0
cel:CELE	C09B9.85	up:J7RNL4	J7RNL4	equivalent					0	0	0				0
cel:CELE	C09C7.1	up:G5ECB1	G5ECB1	equivalent					0	0	0				0
cel:CELE	C09D1.1	up:O01761	O01761	equivalent					0	0	0				0
cel:CELE	C09D1.2	up:G4RY15	G4RY15	equivalent					0	0	0				0
cel:CELE	C09D4.1	up:O01735	O01735	equivalent					0	0	0				0
cel:CELE	C09D4.2	up:O01734	O01734	equivalent					0	0	0				0
cel:CELE	C09D4.3	up:O01733	O01733	equivalent					0	0	0				0
cel:CELE	C09D4.4	up:O01731	O01731	equivalent					0	0	0				0
cel:CELE	C09D4.5	up:O02639	O02639	equivalent					0	0	0				0
cel:CELE	C09D4.6	up:O01732	O01732	equivalent					0	0	0				0
cel:CELE	C09D4.9	up:E4MVC6	E4MVC6	equivalent					0	0	0				0
cel:CELE	C09D8.1	up:G5EDC5	G5EDC5	equivalent					0	0	0				0
cel:CELE	C09E10.2	up:Q58AU6	Q58AU6	equivalent					0	0	0				0
cel:CELE	C09E7.1	up:Q95YE4	Q95YE4	equivalent					0	0	0				0
cel:CELE	C09E7.10	up:Q4W5T7	Q4W5T7	equivalent					0	0	0				0
cel:CELE	C09E7.2	up:Q95YE5	Q95YE5	equivalent					0	0	0				0
cel:CELE	C09E7.3	up:Q9N5Z2	Q9N5Z2	equivalent					0	0	0				0
cel:CELE	C09E7.4	up:Q9N5Z0	Q9N5Z0	equivalent					1	0	0	Q9N5Z0			1
cel:CELE	C09E7.5	up:Q9N5Y9	Q9N5Y9	equivalent					0	0	0				0
cel:CELE	C09E7.7	up:Q9N5Y7	Q9N5Y7	equivalent					0	0	0				0
cel:CELE	C09E7.8	up:H2KYM7	H2KYM7	equivalent					0	0	0				0
cel:CELE	C09E8.1	up:H2KYM8	H2KYM8	equivalent					0	0	0				0
cel:CELE	C09E8.2	up:O76556	O76556	equivalent					0	0	0				0
cel:CELE	C09E8.3	up:O76555	O76555	equivalent					0	0	0				0
cel:CELE	C09E9.1	up:Q93196	Q93196	equivalent					0	0	0				0
cel:CELE	C09F12.1	up:Q93198	Q93198	equivalent					1	0	0	Q93198			1
cel:CELE	C09F12.2	up:Q93199	Q93199	equivalent					0	0	0				0
cel:CELE	C09F12.3	up:G5EE93	G5EE93	equivalent					0	0	0				0
cel:CELE	C09F5.1	up:Q09231	Q09231	equivalent					0	0	0				0
cel:CELE	C09F5.2	up:B6VQ32	B6VQ32	equivalent					0	0	0				0
cel:CELE	C09F5.3	up:Q09452	Q09452	equivalent					0	0	0				0
cel:CELE	C09F9.1	up:O62058	O62058	equivalent					0	0	0				0
cel:CELE	C09F9.2	up:O62055	O62055	equivalent					0	0	0				0
cel:CELE	C09F9.3	up:U4PRW7	U4PRW7	equivalent					0	0	0				0
cel:CELE	C09G1.1	up:Q17862	Q17862	equivalent					0	0	0				0
cel:CELE	C09G1.2	up:Q17863	Q17863	equivalent					0	0	0				0
cel:CELE	C09G1.3	up:Q17864	Q17864	equivalent					0	0	0				0
cel:CELE	C09G1.4	up:Q17865	Q17865	equivalent					0	0	0				0
cel:CELE	C09G1.5	up:Q7YTR3	Q7YTR3	equivalent					0	0	0				0
cel:CELE	C09G12.1	up:O44462	O44462	equivalent					0	0	0				0
cel:CELE	C09G12.10	up:Q6A587	Q6A587	equivalent					0	0	0				0
cel:CELE	C09G12.11	up:Q6A588	Q6A588	equivalent					0	0	0				0
cel:CELE	C09G12.15	up:U3UB87	U3UB87	equivalent					0	0	0				0
cel:CELE	C09G12.16	up:Q688B8	Q688B8	equivalent					0	0	0				0
cel:CELE	C09G12.17	up:Q4R131	Q4R131	equivalent					0	0	0				0
cel:CELE	C09G12.2	up:O44460	O44460	equivalent					0	0	0				0
cel:CELE	C09G12.3	up:O44459	O44459	equivalent					0	0	0				0
cel:CELE	C09G12.5	up:O44457	O44457	equivalent					0	0	0				0
cel:CELE	C09G12.6	up:Q688B9	Q688B9	equivalent					0	0	0				0
cel:CELE	C09G12.8	up:Q03206	Q03206	equivalent					0	0	0				0
cel:CELE	C09G12.9	up:O76258	O76258	equivalent					0	0	0				0
cel:CELE	C09G4.1	up:X5LPS5	X5LPS5	equivalent					0	0	0				0
cel:CELE	C09G4.2	up:H2KYN2	H2KYN2	equivalent					0	0	0				0
cel:CELE	C09G4.3	up:Q17868	Q17868	equivalent					0	0	0				0
cel:CELE	C09G4.4	up:G5ED81	G5ED81	equivalent					0	0	0				0
cel:CELE	C09G4.5	up:Q9GYS1	Q9GYS1	equivalent					0	0	0				0
cel:CELE	C09G5.1	up:Q09453	Q09453	equivalent					0	0	0				0
cel:CELE	C09G5.13	up:G3MTX7	G3MTX7	equivalent					0	0	0				0
cel:CELE	C09G5.2	up:Q09454	Q09454	equivalent					0	0	0				0
cel:CELE	C09G5.3	up:Q09233	Q09233	equivalent					0	0	0				0
cel:CELE	C09G5.4	up:Q09455	Q09455	equivalent					1	0	0	Q09455			1
cel:CELE	C09G5.5	up:Q09456	Q09456	equivalent					0	0	0				0
cel:CELE	C09G5.6	up:Q09457	Q09457	equivalent					0	0	0				0
cel:CELE	C09G5.7	up:Q09458	Q09458	equivalent					0	0	0				0
cel:CELE	C09G5.8	up:Q09459	Q09459	equivalent					0	0	0				0
cel:CELE	C09G9.1	up:L8E712	L8E712	equivalent					0	0	0				0
cel:CELE	C09G9.2	up:Q17872	Q17872	equivalent					0	0	0				0
cel:CELE	C09G9.3	up:B2MZB7	B2MZB7	equivalent					0	0	0				0
cel:CELE	C09G9.4	up:Q17874	Q17874	equivalent					0	0	0				0
cel:CELE	C09G9.5	up:Q17875	Q17875	equivalent					0	0	0				0
cel:CELE	C09G9.6	up:G5EC86	G5EC86	equivalent					0	0	0				0
cel:CELE	C09G9.7	up:H9G2Q0	H9G2Q0	equivalent					0	0	0				0
cel:CELE	C09G9.8	up:C6KRI6	C6KRI6	equivalent					0	0	0				0
cel:CELE	C09H10.1	up:Q17879	Q17879	equivalent					0	0	0				0
cel:CELE	C09H10.10	up:Q9U3Q2	Q9U3Q2	equivalent					0	0	0				0
cel:CELE	C09H10.2	up:P48166	P48166	equivalent					0	0	0				0
cel:CELE	C09H10.3	up:Q17880	Q17880	equivalent					0	0	0				0
cel:CELE	C09H10.4	up:E3W727	E3W727	equivalent					0	0	0				0
cel:CELE	C09H10.5	up:E3W729	E3W729	equivalent					0	0	0				0
cel:CELE	C09H10.6	up:Q17886	Q17886	equivalent					0	0	0				0
cel:CELE	C09H10.7	up:Q17883	Q17883	equivalent					0	0	0				0
cel:CELE	C09H10.8	up:Q17884	Q17884	equivalent					1	0	0	Q17884			1
cel:CELE	C09H10.9	up:Q17885	Q17885	equivalent					0	0	0				0
cel:CELE	C09H5.1	up:O16333	O16333	equivalent					0	0	0				0
cel:CELE	C09H5.2	up:O16331	O16331	equivalent					0	0	0				0
cel:CELE	C09H5.3	up:O16328	O16328	equivalent					0	0	0				0
cel:CELE	C09H5.4	up:O16329	O16329	equivalent					0	0	0				0
cel:CELE	C09H5.5	up:O16330	O16330	equivalent					0	0	0				0
cel:CELE	C09H5.6	up:O16332	O16332	equivalent					0	0	0				0
cel:CELE	C09H5.7	up:O16334	O16334	equivalent					0	0	0				0
cel:CELE	C09H5.9	up:O16336	O16336	equivalent					1	0	0	O16336			1
cel:CELE	C09H6.1	up:O17582	O17582	equivalent					0	0	0				0
cel:CELE	C09H6.2	up:O17583	O17583	equivalent					0	0	0				0
cel:CELE	C09H6.3	up:O17581	O17581	equivalent					0	0	0				0
cel:CELE	C10A4.1	up:Q17894	Q17894	equivalent					0	0	0				0
cel:CELE	C10A4.10	up:A8WFH1	A8WFH1	equivalent					1	0	0	A8WFH1			1
cel:CELE	C10A4.13	up:G1K0U5	G1K0U5	equivalent					0	0	0				0
cel:CELE	C10A4.2	up:Q17892	Q17892	equivalent					0	0	0				0
cel:CELE	C10A4.3	up:Q17891	Q17891	equivalent					0	0	0				0
cel:CELE	C10A4.4	up:Q17890	Q17890	equivalent					0	0	0				0
cel:CELE	C10A4.5	up:Q17889	Q17889	equivalent					0	0	0				0
cel:CELE	C10A4.6	up:Q17888	Q17888	equivalent					0	0	0				0
cel:CELE	C10A4.7	up:Q17893	Q17893	equivalent					0	0	0				0
cel:CELE	C10A4.8	up:Q17895	Q17895	equivalent					0	0	0				0
cel:CELE	C10A4.9	up:H8W3X0	H8W3X0	equivalent					0	0	0				0
cel:CELE	C10B5.1	up:O16318	O16318	equivalent					0	0	0				0
cel:CELE	C10B5.3	up:O16319	O16319	equivalent					0	0	0				0
cel:CELE	C10C5.1	up:C6KRJ3	C6KRJ3	equivalent					0	0	0				0
cel:CELE	C10C5.2	up:Q17896	Q17896	equivalent					0	0	0				0
cel:CELE	C10C5.3	up:Q17898	Q17898	equivalent					0	0	0				0
cel:CELE	C10C5.4	up:Q17899	Q17899	equivalent					0	0	0				0
cel:CELE	C10C5.5	up:Q17900	Q17900	equivalent					0	0	0				0
cel:CELE	C10C5.6	up:Q68TI8	Q68TI8	equivalent					0	0	0				0
cel:CELE	C10C5.7	up:Q7YX82	Q7YX82	equivalent					0	0	0				0
cel:CELE	C10C6.1	up:H9G328	H9G328	equivalent					0	0	0				0
cel:CELE	C10C6.13	up:I7KSD1	I7KSD1	equivalent					0	0	0				0
cel:CELE	C10C6.2	up:P90745	P90745	equivalent					0	0	0				0
cel:CELE	C10C6.3	up:P90743	P90743	equivalent					0	0	0				0
cel:CELE	C10C6.5	up:P90746	P90746	equivalent					0	0	0				0
cel:CELE	C10C6.6	up:P90747	P90747	equivalent					0	0	0				0
cel:CELE	C10C6.7	up:A0T4F7	A0T4F7	equivalent					0	0	0				0
cel:CELE	C10E2.1	up:O17327	O17327	equivalent					0	0	0				0
cel:CELE	C10E2.2	up:O17324	O17324	equivalent					0	0	0				0
cel:CELE	C10E2.3	up:O17323	O17323	equivalent					0	0	0				0
cel:CELE	C10E2.4	up:O17325	O17325	equivalent					0	0	0				0
cel:CELE	C10E2.5	up:O17326	O17326	equivalent					0	0	0				0
cel:CELE	C10E2.6	up:O17328	O17328	equivalent					0	0	0				0
cel:CELE	C10F3.1	up:O16883	O16883	equivalent					0	0	0				0
cel:CELE	C10F3.2	up:O16881	O16881	equivalent					0	0	0				0
cel:CELE	C10F3.3	up:O16880	O16880	equivalent					0	0	0				0
cel:CELE	C10F3.4	up:Q5ZR76	Q5ZR76	equivalent					0	0	0				0
cel:CELE	C10F3.5	up:G8JY24	G8JY24	equivalent					0	0	0				0
cel:CELE	C10F3.6	up:G5EFE7	G5EFE7	equivalent					0	0	0				0
cel:CELE	C10F3.7	up:Q8IA79	Q8IA79	equivalent					0	0	0				0
cel:CELE	C10G11.1	up:E5QCF4	E5QCF4	equivalent					0	0	0				0
cel:CELE	C10G11.10	up:P91033	P91033	equivalent					0	0	0				0
cel:CELE	C10G11.2	up:P91032	P91032	equivalent					0	0	0				0
cel:CELE	C10G11.3	up:P91031	P91031	equivalent					0	0	0				0
cel:CELE	C10G11.4	up:P91030	P91030	equivalent					0	0	0				0
cel:CELE	C10G11.5	up:H2KYP7	H2KYP7	equivalent					0	0	0				0
cel:CELE	C10G11.6	up:E5QCF3	E5QCF3	equivalent					0	0	0				0
cel:CELE	C10G11.7	up:P91027	P91027	equivalent					0	0	0				0
cel:CELE	C10G11.8	up:P91025	P91025	equivalent					0	0	0				0
cel:CELE	C10G11.9	up:P91026	P91026	equivalent					0	0	0				0
cel:CELE	C10G6.1	up:Q17902	Q17902	equivalent					0	0	0				0
cel:CELE	C10G8.1	up:Q94168	Q94168	equivalent					1	0	0	Q94168			1
cel:CELE	C10G8.2	up:Q94164	Q94164	equivalent					0	0	0				0
cel:CELE	C10G8.3	up:Q94163	Q94163	equivalent					0	0	0				0
cel:CELE	C10G8.4	up:Q94162	Q94162	equivalent					0	0	0				0
cel:CELE	C10G8.5	up:H2KYP3	H2KYP3	equivalent					0	0	0				0
cel:CELE	C10G8.6	up:Q94165	Q94165	equivalent					0	0	0				0
cel:CELE	C10G8.7	up:Q94166	Q94166	equivalent					0	0	0				0
cel:CELE	C10G8.8	up:H2KYP5	H2KYP5	equivalent					0	0	0				0
cel:CELE	C10H11.1	up:P91041	P91041	equivalent					0	0	0				0
cel:CELE	C10H11.10	up:G5EBU5	G5EBU5	equivalent					0	0	0				0
cel:CELE	C10H11.3	up:P91039	P91039	equivalent					0	0	1			P91039	1
cel:CELE	C10H11.4	up:P91038	P91038	equivalent					0	0	0				0
cel:CELE	C10H11.5	up:P91037	P91037	equivalent					0	0	0				0
cel:CELE	C10H11.6	up:H2KYQ0	H2KYQ0	equivalent					0	0	0				0
cel:CELE	C10H11.7	up:P91035	P91035	equivalent					0	0	0				0
cel:CELE	C10H11.8	up:E5QCF5	E5QCF5	equivalent					0	0	0				0
cel:CELE	C10H11.9	up:P92199	P92199	equivalent					0	0	0				0
cel:CELE	C11D2.2	up:O45072	O45072	equivalent					0	0	0				0
cel:CELE	C11D2.3	up:O45068	O45068	equivalent					0	0	0				0
cel:CELE	C11D2.4	up:O45069	O45069	equivalent					0	0	0				0
cel:CELE	C11D2.6	up:V6CLZ1	V6CLZ1	equivalent					0	0	0				0
cel:CELE	C11D2.7	up:Q8MXH7	Q8MXH7	equivalent					0	0	0				0
cel:CELE	C11D9.1	up:O01847	O01847	equivalent					1	0	0	O01847			1
cel:CELE	C11E4.1	up:Q93204	Q93204	equivalent					0	0	0				0
cel:CELE	C11E4.2	up:Q95003	Q95003	equivalent					0	0	0				0
cel:CELE	C11E4.3	up:Q93205	Q93205	equivalent					0	0	0				0
cel:CELE	C11E4.6	up:Q93203	Q93203	equivalent					0	0	0				0
cel:CELE	C11E4.7	up:Q93206	Q93206	equivalent					1	0	0	Q93206			1
cel:CELE	C11E4.8	up:Q7YX70	Q7YX70	equivalent					0	0	0				0
cel:CELE	C11G10.1	up:Q17903	Q17903	equivalent					1	0	0	Q17903			1
cel:CELE	C11G10.2	up:Q17904	Q17904	equivalent					0	0	0				0
cel:CELE	C11G6.1	up:E9P861	E9P861	equivalent					0	0	0				0
cel:CELE	C11G6.2	up:Q17908	Q17908	equivalent					0	0	0				0
cel:CELE	C11G6.4	up:Q17905	Q17905	equivalent					0	0	0				0
cel:CELE	C11H1.2	up:Q17912	Q17912	equivalent					0	0	0				0
cel:CELE	C11H1.3	up:Q17911	Q17911	equivalent					0	0	0				0
cel:CELE	C11H1.4	up:G5ED99	G5ED99	equivalent					0	0	0				0
cel:CELE	C11H1.5	up:Q17910	Q17910	equivalent					1	0	0	Q17910			1
cel:CELE	C11H1.7	up:G5EDB0	G5EDB0	equivalent					0	0	0				0
cel:CELE	C11H1.8	up:Q8MQE1	Q8MQE1	equivalent					0	0	0				0
cel:CELE	C11H1.9	up:Q5WRP2	Q5WRP2	equivalent					0	0	0				0
cel:CELE	C12C8.1	up:O45246	O45246	equivalent					0	0	0				0
cel:CELE	C12C8.2	up:O02215	O02215	equivalent					0	0	0				0
cel:CELE	C12C8.3	up:Q9U489	Q9U489	equivalent					0	0	0				0
cel:CELE	C12D12.1	up:H2KYQ2	H2KYQ2	equivalent					0	0	0				0
cel:CELE	C12D12.2	up:Q10901	Q10901	equivalent					0	0	0				0
cel:CELE	C12D12.3	up:Q17919	Q17919	equivalent					0	0	0				0
cel:CELE	C12D12.4	up:Q17918	Q17918	equivalent					0	0	0				0
cel:CELE	C12D12.5	up:Q17922	Q17922	equivalent					0	0	0				0
cel:CELE	C12D5.10	up:Q17932	Q17932	equivalent					0	0	0				0
cel:CELE	C12D5.11	up:Q8I7M5	Q8I7M5	equivalent					1	0	0	Q8I7M5			1
cel:CELE	C12D5.2	up:Q17929	Q17929	equivalent					0	0	0				0
cel:CELE	C12D5.3	up:Q17927	Q17927	equivalent					0	0	0				0
cel:CELE	C12D5.4	up:Q17925	Q17925	equivalent					0	0	0				0
cel:CELE	C12D5.5	up:Q17924	Q17924	equivalent					0	0	0				0
cel:CELE	C12D5.7	up:Q27470	Q27470	equivalent					0	1	0		Q27470		1
cel:CELE	C12D5.8	up:G5ECI7	G5ECI7	equivalent					0	0	0				0
cel:CELE	C12D5.9	up:Q17930	Q17930	equivalent					0	0	0				0
cel:CELE	C12D8.1	up:Q17935	Q17935	equivalent					0	0	0				0
cel:CELE	C12D8.10	up:Q17941	Q17941	equivalent					0	0	0				0
cel:CELE	C12D8.11	up:Q27274	Q27274	equivalent					0	0	0				0
cel:CELE	C12D8.12	up:Q17943	Q17943	equivalent					0	0	0				0
cel:CELE	C12D8.13	up:Q7YTS4	Q7YTS4	equivalent					0	0	0				0
cel:CELE	C12D8.14	up:Q7YTS3	Q7YTS3	equivalent					0	0	0				0
cel:CELE	C12D8.15	up:Q7YTS2	Q7YTS2	equivalent					0	0	0				0
cel:CELE	C12D8.16	up:Q7YTS1	Q7YTS1	equivalent					0	0	0				0
cel:CELE	C12D8.17	up:Q7YTS0	Q7YTS0	equivalent					0	0	0				0
cel:CELE	C12D8.18	up:Q565A0	Q565A0	equivalent					0	0	0				0
cel:CELE	C12D8.19	up:Q564Z9	Q564Z9	equivalent					0	0	0				0
cel:CELE	C12D8.20	up:C9IY26	C9IY26	equivalent					0	0	0				0
cel:CELE	C12D8.21	up:D7SFN3	D7SFN3	equivalent					0	0	0				0
cel:CELE	C12D8.4	up:Q17937	Q17937	equivalent					0	0	0				0
cel:CELE	C12D8.5	up:Q17938	Q17938	equivalent					0	0	1			Q17938	1
cel:CELE	C12D8.6	up:Q17934	Q17934	equivalent					0	0	0				0
cel:CELE	C12D8.8	up:Q17939	Q17939	equivalent					0	0	0				0
cel:CELE	C12D8.9	up:Q17940	Q17940	equivalent					0	0	0				0
cel:CELE	C13A10.1	up:A0A078BTM6	A0A078BTM6	equivalent					0	0	0				0
cel:CELE	C13A10.2	up:P91043	P91043	equivalent					1	0	0	P91043			1
cel:CELE	C13A2.1	up:O16878	O16878	equivalent					0	0	0				0
cel:CELE	C13A2.10	up:O16872	O16872	equivalent					0	0	0				0
cel:CELE	C13A2.11	up:O16875	O16875	equivalent					0	0	0				0
cel:CELE	C13A2.12	up:Q4R142	Q4R142	equivalent					0	0	0				0
cel:CELE	C13A2.2	up:O16877	O16877	equivalent					0	0	0				0
cel:CELE	C13A2.3	up:O16876	O16876	equivalent					0	0	0				0
cel:CELE	C13A2.4	up:O16874	O16874	equivalent					0	0	0				0
cel:CELE	C13A2.5	up:O16873	O16873	equivalent					0	0	0				0
cel:CELE	C13A2.6	up:O16871	O16871	equivalent					0	0	0				0
cel:CELE	C13A2.7	up:C4IWZ6	C4IWZ6	equivalent					0	0	0				0
cel:CELE	C13A2.9	up:O16869	O16869	equivalent					0	0	0				0
cel:CELE	C13B4.1	up:O45247	O45247	equivalent					0	0	0				0
cel:CELE	C13B4.2	up:Q17361	Q17361	equivalent					0	0	0				0
cel:CELE	C13B7.1	up:G5EF36	G5EF36	equivalent					0	0	0				0
cel:CELE	C13B7.2	up:Q9UAU8	Q9UAU8	equivalent					0	0	0				0
cel:CELE	C13B7.3	up:G5EF74	G5EF74	equivalent					0	0	0				0
cel:CELE	C13B7.4	up:G5EG08	G5EG08	equivalent					0	0	0				0
cel:CELE	C13B7.5	up:Q9UAU7	Q9UAU7	equivalent					0	0	0				0
cel:CELE	C13B7.6	up:Q95X12	Q95X12	equivalent					0	0	0				0
cel:CELE	C13B9.2	up:Q09235	Q09235	equivalent					0	0	0				0
cel:CELE	C13B9.3	up:Q09236	Q09236	equivalent					0	0	0				0
cel:CELE	C13B9.4	up:S6FD44	S6FD44	equivalent					0	0	0				0
cel:CELE	C13C12.1	up:H9G2Z0	H9G2Z0	equivalent					0	0	0				0
cel:CELE	C13C12.2	up:Q17944	Q17944	equivalent					0	0	0				0
cel:CELE	C13C4.1	up:O01929	O01929	equivalent					0	0	0				0
cel:CELE	C13C4.2	up:O01931	O01931	equivalent					0	0	0				0
cel:CELE	C13C4.3	up:O01930	O01930	equivalent					0	0	0				0
cel:CELE	C13C4.4	up:O01926	O01926	equivalent					0	0	0				0
cel:CELE	C13C4.5	up:O01927	O01927	equivalent					0	0	0				0
cel:CELE	C13C4.6	up:O01928	O01928	equivalent					0	0	0				0
cel:CELE	C13C4.7	up:Q7YTR4	Q7YTR4	equivalent					0	0	0				0
cel:CELE	C13C4.8	up:E2JL08	E2JL08	equivalent					0	0	0				0
cel:CELE	C13D9.1	up:O16246	O16246	equivalent					1	0	0	O16246			1
cel:CELE	C13D9.3	up:O16244	O16244	equivalent					0	0	0				0
cel:CELE	C13D9.4	up:O16238	O16238	equivalent					0	0	0				0
cel:CELE	C13D9.5	up:O16239	O16239	equivalent					0	0	0				0
cel:CELE	C13D9.6	up:O16240	O16240	equivalent					0	0	0				0
cel:CELE	C13D9.7	up:O16241	O16241	equivalent					0	0	0				0
cel:CELE	C13D9.8	up:O16242	O16242	equivalent					0	0	0				0
cel:CELE	C13D9.9	up:O16243	O16243	equivalent					0	0	0				0
cel:CELE	C13E3.1	up:Q8WQC2	Q8WQC2	equivalent					0	0	0				0
cel:CELE	C13F10.1	up:H2KYG3	H2KYG3	equivalent					0	0	0				0
cel:CELE	C13F10.2	up:O01488	O01488	equivalent					0	0	0				0
cel:CELE	C13F10.4	up:O01485	O01485	equivalent					0	0	0				0
cel:CELE	C13F10.5	up:O01486	O01486	equivalent					0	0	0				0
cel:CELE	C13F10.6	up:O01487	O01487	equivalent					0	0	0				0
cel:CELE	C13F10.7	up:O01489	O01489	equivalent					0	0	0				0
cel:CELE	C13G3.1	up:Q17947	Q17947	equivalent					0	0	0				0
cel:CELE	C13G3.2	up:G5EER8	G5EER8	equivalent					0	0	0				0
cel:CELE	C13G3.3	up:A9UJN4	A9UJN4	equivalent					0	0	0				0
cel:CELE	C13G5.1	up:P34326	P34326	equivalent					0	0	0				0
cel:CELE	C13G5.2	up:P34327	P34327	equivalent					0	0	0				0
cel:CELE	C14A11.1	up:G4RWX0	G4RWX0	equivalent					0	0	0				0
cel:CELE	C14A11.2	up:O02135	O02135	equivalent					0	0	0				0
cel:CELE	C14A11.3	up:H2KYI7	H2KYI7	equivalent					0	0	0				0
cel:CELE	C14A11.5	up:O02136	O02136	equivalent					0	0	0				0
cel:CELE	C14A11.6	up:A8WFN8	A8WFN8	equivalent					1	0	0	A8WFN8			1
cel:CELE	C14A11.7	up:O02139	O02139	equivalent					0	0	0				0
cel:CELE	C14A11.9	up:A8WFN7	A8WFN7	equivalent					0	0	0				0
cel:CELE	C14A4.1	up:Q17949	Q17949	equivalent					0	0	0				0
cel:CELE	C14A4.10	up:Q17957	Q17957	equivalent					0	0	0				0
cel:CELE	C14A4.11	up:Q17958	Q17958	equivalent					0	0	0				0
cel:CELE	C14A4.12	up:Q17959	Q17959	equivalent					0	0	0				0
cel:CELE	C14A4.13	up:G5EFC2	G5EFC2	equivalent					0	0	0				0
cel:CELE	C14A4.14	up:Q9U3Q0	Q9U3Q0	equivalent					0	0	0				0
cel:CELE	C14A4.15	up:Q86GC5	Q86GC5	equivalent					0	0	0				0
cel:CELE	C14A4.2	up:G5EFC8	G5EFC8	equivalent					0	0	0				0
cel:CELE	C14A4.3	up:P54002	P54002	equivalent					0	0	0				0
cel:CELE	C14A4.4	up:G5EBX6	G5EBX6	equivalent					0	0	0				0
cel:CELE	C14A4.5	up:G5EG59	G5EG59	equivalent					0	0	0				0
cel:CELE	C14A4.6	up:Q17953	Q17953	equivalent					0	0	0				0
cel:CELE	C14A4.7	up:Q17954	Q17954	equivalent					0	0	0				0
cel:CELE	C14A4.8	up:Q17955	Q17955	equivalent					0	0	0				0
cel:CELE	C14A4.9	up:Q17956	Q17956	equivalent					0	0	0				0
cel:CELE	C14A6.1	up:Q9XVE1	Q9XVE1	equivalent					1	0	0	Q9XVE1			1
cel:CELE	C14A6.12	up:A8WI09	A8WI09	equivalent					0	0	0				0
cel:CELE	C14A6.13	up:A8WI10	A8WI10	equivalent					0	0	0				0
cel:CELE	C14A6.3	up:Q9XVE2	Q9XVE2	equivalent					0	0	0				0
cel:CELE	C14A6.5	up:Q9XVE3	Q9XVE3	equivalent					0	0	0				0
cel:CELE	C14A6.6	up:Q9XVE4	Q9XVE4	equivalent					0	0	0				0
cel:CELE	C14A6.7	up:Q9XVD9	Q9XVD9	equivalent					0	0	0				0
cel:CELE	C14A6.8	up:Q9XVD8	Q9XVD8	equivalent					0	0	0				0
cel:CELE	C14B1.1	up:Q17967	Q17967	equivalent					0	0	0				0
cel:CELE	C14B1.10	up:Q9U3P9	Q9U3P9	equivalent					0	0	0				0
cel:CELE	C14B1.12	up:C0P279	C0P279	equivalent					0	0	0				0
cel:CELE	C14B1.2	up:Q17961	Q17961	equivalent					0	0	0				0
cel:CELE	C14B1.3	up:Q17962	Q17962	equivalent					0	0	0				0
cel:CELE	C14B1.4	up:Q17963	Q17963	equivalent					0	0	0				0
cel:CELE	C14B1.5	up:P49958	P49958	equivalent					0	0	0				0
cel:CELE	C14B1.6	up:Q17968	Q17968	equivalent					0	0	0				0
cel:CELE	C14B1.7	up:C8JQR1	C8JQR1	equivalent					0	0	0				0
cel:CELE	C14B1.8	up:Q17964	Q17964	equivalent					0	0	0				0
cel:CELE	C14B1.9	up:Q17966	Q17966	equivalent					0	0	0				0
cel:CELE	C14B4.2	up:G5ED06	G5ED06	equivalent					0	0	0				0
cel:CELE	C14B9.1	up:P34328	P34328	equivalent					0	0	0				0
cel:CELE	C14B9.10	up:Q8MNV8	Q8MNV8	equivalent					0	0	0				0
cel:CELE	C14B9.2	up:P34329	P34329	equivalent					0	0	0				0
cel:CELE	C14B9.3	up:P34330	P34330	equivalent					0	0	0				0
cel:CELE	C14B9.4	up:P34331	P34331	equivalent					0	0	0				0
cel:CELE	C14B9.6	up:P34333	P34333	equivalent					0	0	0				0
cel:CELE	C14B9.7	up:P34334	P34334	equivalent					0	0	0				0
cel:CELE	C14B9.8	up:P34335	P34335	equivalent					0	0	0				0
cel:CELE	C14C10.1	up:Q17970	Q17970	equivalent					0	0	0				0
cel:CELE	C14C10.2	up:Q2PJ75	Q2PJ75	equivalent					0	0	0				0
cel:CELE	C14C10.3	up:Q52GY7	Q52GY7	equivalent					0	0	0				0
cel:CELE	C14C10.4	up:Q17974	Q17974	equivalent					0	0	0				0
cel:CELE	C14C10.5	up:Q17971	Q17971	equivalent					0	0	0				0
cel:CELE	C14C10.6	up:G5EEQ9	G5EEQ9	equivalent					0	0	0				0
cel:CELE	C14C10.7	up:Q95QW9	Q95QW9	equivalent					0	0	0				0
cel:CELE	C14C11.1	up:Q17980	Q17980	equivalent					0	0	0				0
cel:CELE	C14C11.2	up:Q17979	Q17979	equivalent					0	0	0				0
cel:CELE	C14C11.3	up:G5EFL1	G5EFL1	equivalent					0	0	0				0
cel:CELE	C14C11.4	up:Q17976	Q17976	equivalent					0	0	0				0
cel:CELE	C14C11.5	up:Q17975	Q17975	equivalent					1	0	0	Q17975			1
cel:CELE	C14C11.6	up:Q17978	Q17978	equivalent					0	0	0				0
cel:CELE	C14C11.7	up:Q17981	Q17981	equivalent					0	0	0				0
cel:CELE	C14C11.8	up:Q17982	Q17982	equivalent					0	0	0				0
cel:CELE	C14C6.1	up:O44674	O44674	equivalent					0	0	0				0
cel:CELE	C14C6.10	up:O44676	O44676	equivalent					0	0	0				0
cel:CELE	C14C6.11	up:A0A0B7H3M6	A0A0B7H3M6	equivalent					0	0	0				0
cel:CELE	C14C6.13	up:O44679	O44679	equivalent					0	0	0				0
cel:CELE	C14C6.2	up:O44675	O44675	equivalent					0	0	0				0
cel:CELE	C14C6.3	up:O44669	O44669	equivalent					0	0	0				0
cel:CELE	C14C6.4	up:O44668	O44668	equivalent					0	0	0				0
cel:CELE	C14C6.5	up:O44667	O44667	equivalent					1	0	1	O44667		O44667	2
cel:CELE	C14C6.6	up:O44670	O44670	equivalent					0	0	0				0
cel:CELE	C14C6.8	up:O44672	O44672	equivalent					0	0	0				0
cel:CELE	C14C6.9	up:O44673	O44673	equivalent					0	0	0				0
cel:CELE	C14E2.1	up:Q17987	Q17987	equivalent					0	0	0				0
cel:CELE	C14E2.11	up:E7EM25	E7EM25	equivalent					0	0	0				0
cel:CELE	C14E2.3	up:Q17984	Q17984	equivalent					0	0	0				0
cel:CELE	C14E2.4	up:Q17985	Q17985	equivalent					0	0	0				0
cel:CELE	C14E2.5	up:Q17986	Q17986	equivalent					0	0	0				0
cel:CELE	C14E2.6	up:Q17988	Q17988	equivalent					0	0	0				0
cel:CELE	C14E2.7	up:Q4PIV3	Q4PIV3	equivalent					0	0	0				0
cel:CELE	C14F11.1	up:Q17994	Q17994	equivalent					0	0	0				0
cel:CELE	C14F11.2	up:Q17989	Q17989	equivalent					0	0	0				0
cel:CELE	C14F11.3	up:Q17990	Q17990	equivalent					0	0	0				0
cel:CELE	C14F11.4	up:H2KYS2	H2KYS2	equivalent					0	0	0				0
cel:CELE	C14F11.5	up:H2KYS1	H2KYS1	equivalent					0	0	0				0
cel:CELE	C14F11.6	up:Q17993	Q17993	equivalent					1	0	0	Q17993			1
cel:CELE	C14F11.7	up:Q95QW8	Q95QW8	equivalent					0	0	0				0
cel:CELE	C14F5.1	up:Q09969	Q09969	equivalent					0	0	0				0
cel:CELE	C14F5.2	up:G5EEY6	G5EEY6	equivalent					0	0	0				0
cel:CELE	C14F5.3	up:H2KYL7	H2KYL7	equivalent					0	0	0				0
cel:CELE	C14F5.4	up:Q09972	Q09972	equivalent					0	0	0				0
cel:CELE	C14F5.5	up:P29355	P29355	equivalent					0	0	0				0
cel:CELE	C14H10.1	up:Q17996	Q17996	equivalent					1	0	0	Q17996			1
cel:CELE	C14H10.2	up:G5EDI1	G5EDI1	equivalent					0	0	0				0
cel:CELE	C14H10.3	up:B1Q254	B1Q254	equivalent					0	0	0				0
cel:CELE	C14H10.4	up:O62060	O62060	equivalent					0	0	0				0
cel:CELE	C15A11.1	up:Q93208	Q93208	equivalent					0	0	0				0
cel:CELE	C15A11.2	up:Q93209	Q93209	equivalent					0	0	0				0
cel:CELE	C15A11.3	up:Q93212	Q93212	equivalent					0	0	0				0
cel:CELE	C15A11.4	up:Q93213	Q93213	equivalent					0	0	0				0
cel:CELE	C15A11.5	up:P18832	P18832	equivalent					0	0	0				0
cel:CELE	C15A11.6	up:Q93207	Q93207	equivalent					0	0	0				0
cel:CELE	C15A11.7	up:Q93211	Q93211	equivalent					0	0	0				0
cel:CELE	C15A7.1	up:Q17999	Q17999	equivalent					0	0	0				0
cel:CELE	C15A7.2	up:Q18000	Q18000	equivalent					0	0	0				0
cel:CELE	C15A7.4	up:A5JYS3	A5JYS3	equivalent					0	0	0				0
cel:CELE	C15B12.1	up:Q18006	Q18006	equivalent					1	0	0	Q18006			1
cel:CELE	C15B12.2	up:Q18003	Q18003	equivalent					0	0	0				0
cel:CELE	C15B12.3	up:Q18004	Q18004	equivalent					0	0	0				0
cel:CELE	C15B12.4	up:Q18005	Q18005	equivalent					0	0	0				0
cel:CELE	C15B12.5	up:Q18007	Q18007	equivalent					0	0	0				0
cel:CELE	C15B12.6	up:Q18008	Q18008	equivalent					0	0	0				0
cel:CELE	C15B12.7	up:Q95QW4	Q95QW4	equivalent					0	0	0				0
cel:CELE	C15B12.8	up:Q8WSW2	Q8WSW2	equivalent					0	0	0				0
cel:CELE	C15B12.9	up:Q4PIW6	Q4PIW6	equivalent					0	0	0				0
cel:CELE	C15C6.1	up:Q9XVT5	Q9XVT5	equivalent					1	0	0	Q9XVT5			1
cel:CELE	C15C6.2	up:Q9XVT3	Q9XVT3	equivalent					0	0	0				0
cel:CELE	C15C6.3	up:Q9XVT2	Q9XVT2	equivalent					0	0	0				0
cel:CELE	C15C6.4	up:Q9XVT1	Q9XVT1	equivalent					0	0	0				0
cel:CELE	C15C7.1	up:P83528	P83528	equivalent					0	0	0				0
cel:CELE	C15C7.2	up:Q18013	Q18013	equivalent					0	0	0				0
cel:CELE	C15C7.4	up:Q18010	Q18010	equivalent					0	0	0				0
cel:CELE	C15C7.5	up:Q18012	Q18012	equivalent					0	0	0				0
cel:CELE	C15C7.6	up:Q18015	Q18015	equivalent					0	0	0				0
cel:CELE	C15C7.7	up:Q18014	Q18014	equivalent					1	0	0	Q18014			1
cel:CELE	C15C8.1	up:Q18017	Q18017	equivalent					0	0	0				0
cel:CELE	C15C8.2	up:G5EFL9	G5EFL9	equivalent					0	0	0				0
cel:CELE	C15C8.3	up:Q18020	Q18020	equivalent					1	0	1	Q18020		Q18020	2
cel:CELE	C15C8.4	up:G5EF26	G5EF26	equivalent					0	0	0				0
cel:CELE	C15C8.5	up:Q18019	Q18019	equivalent					0	0	0				0
cel:CELE	C15C8.6	up:Q18021	Q18021	equivalent					0	0	0				0
cel:CELE	C15C8.7	up:G5EC11	G5EC11	equivalent					0	0	0				0
cel:CELE	C15C8.8	up:A5Z2T3	A5Z2T3	equivalent					0	0	0				0
cel:CELE	C15F1.1	up:Q9N5X8	Q9N5X8	equivalent					0	0	0				0
cel:CELE	C15F1.2	up:Q9N5X9	Q9N5X9	equivalent					0	0	0				0
cel:CELE	C15F1.3	up:P34709	P34709	equivalent					0	0	0				0
cel:CELE	C15F1.4	up:P80361	P80361	equivalent					0	0	0				0
cel:CELE	C15F1.5	up:H2KYS7	H2KYS7	equivalent					0	0	0				0
cel:CELE	C15F1.6	up:Q9N5Y2	Q9N5Y2	equivalent					0	0	0				0
cel:CELE	C15F1.7	up:P34697	P34697	equivalent					0	0	0				0
cel:CELE	C15F1.8	up:Q9N5Y0	Q9N5Y0	equivalent					0	0	0				0
cel:CELE	C15H11.1	up:Q9XVS6	Q9XVS6	equivalent					0	0	0				0
cel:CELE	C15H11.10	up:Q7YX89	Q7YX89	equivalent					0	0	0				0
cel:CELE	C15H11.11	up:Q7YX88	Q7YX88	equivalent					0	0	0				0
cel:CELE	C15H11.13	up:B1Q268	B1Q268	equivalent					0	0	0				0
cel:CELE	C15H11.2	up:Q9XVS5	Q9XVS5	equivalent					0	0	0				0
cel:CELE	C15H11.3	up:Q9XVS7	Q9XVS7	equivalent					0	0	0				0
cel:CELE	C15H11.4	up:Q9XVS9	Q9XVS9	equivalent					0	0	0				0
cel:CELE	C15H11.5	up:O17585	O17585	equivalent					0	0	0				0
cel:CELE	C15H11.6	up:Q9XVS8	Q9XVS8	equivalent					0	0	0				0
cel:CELE	C15H11.7	up:O17586	O17586	equivalent					0	0	0				0
cel:CELE	C15H11.8	up:O17587	O17587	equivalent					0	0	0				0
cel:CELE	C15H11.9	up:Q9XVT0	Q9XVT0	equivalent					0	0	0				0
cel:CELE	C15H7.3	up:P34337	P34337	equivalent					0	0	0				0
cel:CELE	C15H7.4	up:P34338	P34338	equivalent					0	0	0				0
cel:CELE	C15H9.1	up:Q18031	Q18031	equivalent					0	0	0				0
cel:CELE	C15H9.11	up:Q95QW3	Q95QW3	equivalent					0	0	0				0
cel:CELE	C15H9.2	up:Q18030	Q18030	equivalent					0	0	0				0
cel:CELE	C15H9.3	up:Q18029	Q18029	equivalent					0	0	0				0
cel:CELE	C15H9.4	up:Q18025	Q18025	equivalent					0	0	0				0
cel:CELE	C15H9.5	up:Q18024	Q18024	equivalent					0	0	0				0
cel:CELE	C15H9.6	up:P27420	P27420	equivalent					0	0	0				0
cel:CELE	C15H9.7	up:Q18026	Q18026	equivalent					0	0	0				0
cel:CELE	C15H9.8	up:Q18028	Q18028	equivalent					0	0	0				0
cel:CELE	C15H9.9	up:Q18032	Q18032	equivalent					0	0	0				0
cel:CELE	C16A11.1	up:O76584	O76584	equivalent					0	0	0				0
cel:CELE	C16A11.10	up:C0Z1Y5	C0Z1Y5	equivalent					0	0	0				0
cel:CELE	C16A11.2	up:H2KYD0	H2KYD0	equivalent					0	0	0				0
cel:CELE	C16A11.3	up:C0Z1Y4	C0Z1Y4	equivalent					0	0	0				0
cel:CELE	C16A11.4	up:O76580	O76580	equivalent					0	0	0				0
cel:CELE	C16A11.5	up:O76579	O76579	equivalent					0	0	0				0
cel:CELE	C16A11.6	up:A3KFE6	A3KFE6	equivalent					0	0	0				0
cel:CELE	C16A11.7	up:O76585	O76585	equivalent					0	0	0				0
cel:CELE	C16A11.8	up:O76586	O76586	equivalent					0	0	0				0
cel:CELE	C16A11.9	up:A3KFE7	A3KFE7	equivalent					0	0	0				0
cel:CELE	C16A3.1	up:Q8MNV7	Q8MNV7	equivalent					0	0	0				0
cel:CELE	C16A3.10	up:Q8MNV6	Q8MNV6	equivalent					0	0	0				0
cel:CELE	C16A3.2	up:Q9TY00	Q9TY00	equivalent					0	0	0				0
cel:CELE	C16A3.3	up:Q18038	Q18038	equivalent					0	0	0				0
cel:CELE	C16A3.4	up:Q18037	Q18037	equivalent					0	0	0				0
cel:CELE	C16A3.5	up:Q18036	Q18036	equivalent					0	0	0				0
cel:CELE	C16A3.6	up:Q18035	Q18035	equivalent					0	0	0				0
cel:CELE	C16A3.7	up:Q18034	Q18034	equivalent					0	0	0				0
cel:CELE	C16A3.8	up:Q18033	Q18033	equivalent					0	0	0				0
cel:CELE	C16A3.9	up:P51404	P51404	equivalent					0	0	0				0
cel:CELE	C16B8.1	up:G5EGT9	G5EGT9	equivalent					0	0	0				0
cel:CELE	C16B8.2	up:Q18042	Q18042	equivalent					0	0	0				0
cel:CELE	C16B8.3	up:Q18043	Q18043	equivalent					0	0	0				0
cel:CELE	C16B8.4	up:Q18044	Q18044	equivalent					0	0	0				0
cel:CELE	C16C10.1	up:Q09461	Q09461	equivalent					0	0	0				0
cel:CELE	C16C10.10	up:Q09253	Q09253	equivalent					0	0	0				0
cel:CELE	C16C10.11	up:Q09254	Q09254	equivalent					0	0	0				0
cel:CELE	C16C10.12	up:Q09466	Q09466	equivalent					0	0	0				0
cel:CELE	C16C10.13	up:Q7YX69	Q7YX69	equivalent					0	0	0				0
cel:CELE	C16C10.2	up:Q09462	Q09462	equivalent					0	0	0				0
cel:CELE	C16C10.3	up:Q09249	Q09249	equivalent					0	0	0				0
cel:CELE	C16C10.4	up:Q09250	Q09250	equivalent					0	0	0				0
cel:CELE	C16C10.5	up:Q09251	Q09251	equivalent					0	0	0				0
cel:CELE	C16C10.6	up:Q09252	Q09252	equivalent					0	0	0				0
cel:CELE	C16C10.7	up:Q09463	Q09463	equivalent					0	0	0				0
cel:CELE	C16C10.8	up:Q09464	Q09464	equivalent					0	0	0				0
cel:CELE	C16C10.9	up:Q09465	Q09465	equivalent					0	0	0				0
cel:CELE	C16C2.1	up:P20269	P20269	equivalent					0	0	0				0
cel:CELE	C16C2.2	up:O17589	O17589	equivalent					0	0	0				0
cel:CELE	C16C2.3	up:O17590	O17590	equivalent					0	0	0				0
cel:CELE	C16C2.4	up:O17591	O17591	equivalent					0	0	0				0
cel:CELE	C16C4.1	up:O44325	O44325	equivalent					0	0	0				0
cel:CELE	C16C4.10	up:O16558	O16558	equivalent					0	0	0				0
cel:CELE	C16C4.11	up:O16559	O16559	equivalent					0	0	0				0
cel:CELE	C16C4.12	up:O16560	O16560	equivalent					0	0	0				0
cel:CELE	C16C4.13	up:O16561	O16561	equivalent					0	0	0				0
cel:CELE	C16C4.14	up:O16562	O16562	equivalent					0	0	0				0
cel:CELE	C16C4.15	up:O16553	O16553	equivalent					0	0	0				0
cel:CELE	C16C4.17	up:F3NWW2	F3NWW2	equivalent					0	0	0				0
cel:CELE	C16C4.18	up:D3NQ86	D3NQ86	equivalent					0	0	0				0
cel:CELE	C16C4.3	up:O16555	O16555	equivalent					0	0	0				0
cel:CELE	C16C4.4	up:F3NWW3	F3NWW3	equivalent					0	0	0				0
cel:CELE	C16C4.5	up:O16551	O16551	equivalent					0	0	0				0
cel:CELE	C16C4.6	up:O16550	O16550	equivalent					0	0	0				0
cel:CELE	C16C4.8	up:O16556	O16556	equivalent					0	0	0				0
cel:CELE	C16C4.9	up:O16557	O16557	equivalent					0	0	0				0
cel:CELE	C16C8.10	up:P91046	P91046	equivalent					0	0	0				0
cel:CELE	C16C8.11	up:P91050	P91050	equivalent					0	0	0				0
cel:CELE	C16C8.12	up:P91051	P91051	equivalent					0	0	0				0
cel:CELE	C16C8.13	up:P91052	P91052	equivalent					0	0	0				0
cel:CELE	C16C8.14	up:P91053	P91053	equivalent					0	0	0				0
cel:CELE	C16C8.16	up:P91055	P91055	equivalent					0	0	0				0
cel:CELE	C16C8.17	up:P91058	P91058	equivalent					0	0	0				0
cel:CELE	C16C8.18	up:P91061	P91061	equivalent					0	0	0				0
cel:CELE	C16C8.19	up:Q95ZM7	Q95ZM7	equivalent					0	0	0				0
cel:CELE	C16C8.2	up:P91060	P91060	equivalent					0	0	0				0
cel:CELE	C16C8.20	up:G4S0D4	G4S0D4	equivalent					0	0	0				0
cel:CELE	C16C8.21	up:G4S0D5	G4S0D5	equivalent					0	0	0				0
cel:CELE	C16C8.22	up:G4S0D7	G4S0D7	equivalent					0	0	0				0
cel:CELE	C16C8.4	up:P91057	P91057	equivalent					0	0	0				0
cel:CELE	C16C8.5	up:P91056	P91056	equivalent					0	0	0				0
cel:CELE	C16C8.7	up:P91049	P91049	equivalent					0	0	0				0
cel:CELE	C16C8.8	up:P91048	P91048	equivalent					0	0	0				0
cel:CELE	C16C8.9	up:P91047	P91047	equivalent					0	0	0				0
cel:CELE	C16D2.1	up:O62061	O62061	equivalent					0	0	0				0
cel:CELE	C16D2.2	up:D6VPA4	D6VPA4	equivalent					0	0	0				0
cel:CELE	C16D2.3	up:D6VPA5	D6VPA5	equivalent					0	0	0				0
cel:CELE	C16D6.1	up:O62063	O62063	equivalent					0	0	0				0
cel:CELE	C16D6.2	up:A0A0K3AYF5	A0A0K3AYF5	equivalent					0	0	0				0
cel:CELE	C16D6.3	up:O62064	O62064	equivalent					0	0	0				0
cel:CELE	C16D9.1	up:Q22902	Q22902	equivalent					0	0	0				0
cel:CELE	C16D9.2	up:Q8I7I5	Q8I7I5	equivalent					0	0	0				0
cel:CELE	C16D9.3	up:Q22897	Q22897	equivalent					0	0	0				0
cel:CELE	C16D9.4	up:Q22898	Q22898	equivalent					0	0	0				0
cel:CELE	C16D9.5	up:Q22899	Q22899	equivalent					0	0	0				0
cel:CELE	C16D9.6	up:Q22900	Q22900	equivalent					0	0	0				0
cel:CELE	C16D9.7	up:Q22901	Q22901	equivalent					0	0	0				0
cel:CELE	C16D9.8	up:Q22903	Q22903	equivalent					0	0	0				0
cel:CELE	C16D9.9	up:Q95Q85	Q95Q85	equivalent					0	0	0				0
cel:CELE	C16E9.1	up:Q18048	Q18048	equivalent					0	0	0				0
cel:CELE	C16E9.2	up:Q18046	Q18046	equivalent					0	0	0				0
cel:CELE	C16E9.4	up:Q17394	Q17394	equivalent					0	0	0				0
cel:CELE	C16H3.1	up:Q94172	Q94172	equivalent					0	0	0				0
cel:CELE	C16H3.2	up:G5EC10	G5EC10	equivalent					0	0	0				0
cel:CELE	C16H3.3	up:Q94170	Q94170	equivalent					0	0	0				0
cel:CELE	C17A2.1	up:O16538	O16538	equivalent					0	0	0				0
cel:CELE	C17A2.2	up:O16536	O16536	equivalent					0	0	0				0
cel:CELE	C17A2.3	up:O16535	O16535	equivalent					0	0	0				0
cel:CELE	C17A2.4	up:O16533	O16533	equivalent					0	0	0				0
cel:CELE	C17A2.5	up:O16531	O16531	equivalent					0	0	0				0
cel:CELE	C17A2.7	up:O16534	O16534	equivalent					0	0	0				0
cel:CELE	C17A2.8	up:O16537	O16537	equivalent					0	0	0				0
cel:CELE	C17B7.1	up:O45161	O45161	equivalent					0	0	0				0
cel:CELE	C17B7.11	up:O45159	O45159	equivalent					0	0	0				0
cel:CELE	C17B7.12	up:Q9TXS4	Q9TXS4	equivalent					1	0	0	Q9TXS4			1
cel:CELE	C17B7.14	up:D1YSH4	D1YSH4	equivalent					0	0	0				0
cel:CELE	C17B7.15	up:A0A0S4XRJ7	A0A0S4XRJ7	equivalent					0	0	0				0
[truncated: 18,280 more rows]
