# Supplementary material for: Comparative toxicogenomics of three insensitive munitions constituents 2,4-dinitroanisole, nitroguanidine and nitrotriazolone in the soil nematode Caenorhabditis elegans
Source: BMC Syst Biol. 2018 Dec 14;12(Suppl 7):92. doi: 10.1186/s12918-018-0636-0 (PMC6293504; doi:10.1186/s12918-018-0636-0)
Supplement: Supplementary file 3 — UniProt genes mapping to computationally inferred C. elegans pathways in the Reactome database. (XLSX 508 kb) [file 12918_2018_636_MOESM3_ESM.xlsx]

## Sheet: UniProt map to Reactome
							NQ	NTO	DNAN
UniProt ID	Reactome pathway ID	Reactome pathway web link	Reactome pathway name		Organism	51	328	41	167
Q9NAD6	R-CEL-1059683	http://www.reactome.org/PathwayBrowser/#/R-CEL-1059683	Interleukin-6 signaling	IEA	Caenorhabditis elegans	8	0	0	0
A5A8P6	R-CEL-109688	http://www.reactome.org/PathwayBrowser/#/R-CEL-109688	Cleavage of Growing Transcript in the Termination Region	IEA	Caenorhabditis elegans	4	0	0	0
C1P629	R-CEL-109688	http://www.reactome.org/PathwayBrowser/#/R-CEL-109688	Cleavage of Growing Transcript in the Termination Region	IEA	Caenorhabditis elegans	4	0	0	0
C2BR94	R-CEL-109688	http://www.reactome.org/PathwayBrowser/#/R-CEL-109688	Cleavage of Growing Transcript in the Termination Region	IEA	Caenorhabditis elegans	3	0	0	0
C6KRJ2	R-CEL-109688	http://www.reactome.org/PathwayBrowser/#/R-CEL-109688	Cleavage of Growing Transcript in the Termination Region	IEA	Caenorhabditis elegans	4	0	0	0
D3YT70	R-CEL-109688	http://www.reactome.org/PathwayBrowser/#/R-CEL-109688	Cleavage of Growing Transcript in the Termination Region	IEA	Caenorhabditis elegans	3	0	0	0
G5EBX5	R-CEL-109688	http://www.reactome.org/PathwayBrowser/#/R-CEL-109688	Cleavage of Growing Transcript in the Termination Region	IEA	Caenorhabditis elegans	4	0	0	0
G5EDE4	R-CEL-109688	http://www.reactome.org/PathwayBrowser/#/R-CEL-109688	Cleavage of Growing Transcript in the Termination Region	IEA	Caenorhabditis elegans	4	0	0	0
H2L0N5	R-CEL-109688	http://www.reactome.org/PathwayBrowser/#/R-CEL-109688	Cleavage of Growing Transcript in the Termination Region	IEA	Caenorhabditis elegans	3	0	0	0
H9G2S1	R-CEL-109688	http://www.reactome.org/PathwayBrowser/#/R-CEL-109688	Cleavage of Growing Transcript in the Termination Region	IEA	Caenorhabditis elegans	4	0	0	0
I7KSC2	R-CEL-109688	http://www.reactome.org/PathwayBrowser/#/R-CEL-109688	Cleavage of Growing Transcript in the Termination Region	IEA	Caenorhabditis elegans	4	0	0	0
O01159	R-CEL-109688	http://www.reactome.org/PathwayBrowser/#/R-CEL-109688	Cleavage of Growing Transcript in the Termination Region	IEA	Caenorhabditis elegans	4	0	0	0
O01763	R-CEL-109688	http://www.reactome.org/PathwayBrowser/#/R-CEL-109688	Cleavage of Growing Transcript in the Termination Region	IEA	Caenorhabditis elegans	14	0	0	0
O16293	R-CEL-109688	http://www.reactome.org/PathwayBrowser/#/R-CEL-109688	Cleavage of Growing Transcript in the Termination Region	IEA	Caenorhabditis elegans	4	0	0	0
O17403	R-CEL-109688	http://www.reactome.org/PathwayBrowser/#/R-CEL-109688	Cleavage of Growing Transcript in the Termination Region	IEA	Caenorhabditis elegans	4	0	0	0
O44729	R-CEL-109688	http://www.reactome.org/PathwayBrowser/#/R-CEL-109688	Cleavage of Growing Transcript in the Termination Region	IEA	Caenorhabditis elegans	4	0	0	0
O44781	R-CEL-109688	http://www.reactome.org/PathwayBrowser/#/R-CEL-109688	Cleavage of Growing Transcript in the Termination Region	IEA	Caenorhabditis elegans	6	0	0	0
O45577	R-CEL-109688	http://www.reactome.org/PathwayBrowser/#/R-CEL-109688	Cleavage of Growing Transcript in the Termination Region	IEA	Caenorhabditis elegans	4	0	0	0
O62185	R-CEL-109688	http://www.reactome.org/PathwayBrowser/#/R-CEL-109688	Cleavage of Growing Transcript in the Termination Region	IEA	Caenorhabditis elegans	4	0	0	0
P34498	R-CEL-109688	http://www.reactome.org/PathwayBrowser/#/R-CEL-109688	Cleavage of Growing Transcript in the Termination Region	IEA	Caenorhabditis elegans	4	0	0	0
P49029	R-CEL-109688	http://www.reactome.org/PathwayBrowser/#/R-CEL-109688	Cleavage of Growing Transcript in the Termination Region	IEA	Caenorhabditis elegans	5	0	0	0
P52874	R-CEL-109688	http://www.reactome.org/PathwayBrowser/#/R-CEL-109688	Cleavage of Growing Transcript in the Termination Region	IEA	Caenorhabditis elegans	4	0	0	0
P90978	R-CEL-109688	http://www.reactome.org/PathwayBrowser/#/R-CEL-109688	Cleavage of Growing Transcript in the Termination Region	IEA	Caenorhabditis elegans	4	0	0	0
P91867	R-CEL-109688	http://www.reactome.org/PathwayBrowser/#/R-CEL-109688	Cleavage of Growing Transcript in the Termination Region	IEA	Caenorhabditis elegans	3	0	0	0
Q09345	R-CEL-109688	http://www.reactome.org/PathwayBrowser/#/R-CEL-109688	Cleavage of Growing Transcript in the Termination Region	IEA	Caenorhabditis elegans	4	0	0	0
Q09511	R-CEL-109688	http://www.reactome.org/PathwayBrowser/#/R-CEL-109688	Cleavage of Growing Transcript in the Termination Region	IEA	Caenorhabditis elegans	5	0	0	0
Q09995	R-CEL-109688	http://www.reactome.org/PathwayBrowser/#/R-CEL-109688	Cleavage of Growing Transcript in the Termination Region	IEA	Caenorhabditis elegans	4	0	0	0
Q18033	R-CEL-109688	http://www.reactome.org/PathwayBrowser/#/R-CEL-109688	Cleavage of Growing Transcript in the Termination Region	IEA	Caenorhabditis elegans	3	0	0	0
Q18212	R-CEL-109688	http://www.reactome.org/PathwayBrowser/#/R-CEL-109688	Cleavage of Growing Transcript in the Termination Region	IEA	Caenorhabditis elegans	3	0	0	0
Q18409	R-CEL-109688	http://www.reactome.org/PathwayBrowser/#/R-CEL-109688	Cleavage of Growing Transcript in the Termination Region	IEA	Caenorhabditis elegans	5	0	0	0
Q18907	R-CEL-109688	http://www.reactome.org/PathwayBrowser/#/R-CEL-109688	Cleavage of Growing Transcript in the Termination Region	IEA	Caenorhabditis elegans	4	0	0	0
Q18937	R-CEL-109688	http://www.reactome.org/PathwayBrowser/#/R-CEL-109688	Cleavage of Growing Transcript in the Termination Region	IEA	Caenorhabditis elegans	4	0	0	0
Q19864	R-CEL-109688	http://www.reactome.org/PathwayBrowser/#/R-CEL-109688	Cleavage of Growing Transcript in the Termination Region	IEA	Caenorhabditis elegans	4	0	0	0
Q19866	R-CEL-109688	http://www.reactome.org/PathwayBrowser/#/R-CEL-109688	Cleavage of Growing Transcript in the Termination Region	IEA	Caenorhabditis elegans	4	0	0	0
Q20445	R-CEL-109688	http://www.reactome.org/PathwayBrowser/#/R-CEL-109688	Cleavage of Growing Transcript in the Termination Region	IEA	Caenorhabditis elegans	5	0	0	0
Q21155	R-CEL-109688	http://www.reactome.org/PathwayBrowser/#/R-CEL-109688	Cleavage of Growing Transcript in the Termination Region	IEA	Caenorhabditis elegans	5	0	0	0
Q21278	R-CEL-109688	http://www.reactome.org/PathwayBrowser/#/R-CEL-109688	Cleavage of Growing Transcript in the Termination Region	IEA	Caenorhabditis elegans	3	0	0	0
Q21832	R-CEL-109688	http://www.reactome.org/PathwayBrowser/#/R-CEL-109688	Cleavage of Growing Transcript in the Termination Region	IEA	Caenorhabditis elegans	5	0	0	0
Q23120	R-CEL-109688	http://www.reactome.org/PathwayBrowser/#/R-CEL-109688	Cleavage of Growing Transcript in the Termination Region	IEA	Caenorhabditis elegans	5	0	0	0
Q23121	R-CEL-109688	http://www.reactome.org/PathwayBrowser/#/R-CEL-109688	Cleavage of Growing Transcript in the Termination Region	IEA	Caenorhabditis elegans	5	0	0	0
Q7JPI2	R-CEL-109688	http://www.reactome.org/PathwayBrowser/#/R-CEL-109688	Cleavage of Growing Transcript in the Termination Region	IEA	Caenorhabditis elegans	4	0	0	0
Q8WQF3	R-CEL-109688	http://www.reactome.org/PathwayBrowser/#/R-CEL-109688	Cleavage of Growing Transcript in the Termination Region	IEA	Caenorhabditis elegans	5	0	0	0
Q93233	R-CEL-109688	http://www.reactome.org/PathwayBrowser/#/R-CEL-109688	Cleavage of Growing Transcript in the Termination Region	IEA	Caenorhabditis elegans	4	0	0	0
Q93594	R-CEL-109688	http://www.reactome.org/PathwayBrowser/#/R-CEL-109688	Cleavage of Growing Transcript in the Termination Region	IEA	Caenorhabditis elegans	14	0	0	0
Q93716	R-CEL-109688	http://www.reactome.org/PathwayBrowser/#/R-CEL-109688	Cleavage of Growing Transcript in the Termination Region	IEA	Caenorhabditis elegans	4	0	0	0
Q95PY8	R-CEL-109688	http://www.reactome.org/PathwayBrowser/#/R-CEL-109688	Cleavage of Growing Transcript in the Termination Region	IEA	Caenorhabditis elegans	4	0	0	0
Q9BL61	R-CEL-109688	http://www.reactome.org/PathwayBrowser/#/R-CEL-109688	Cleavage of Growing Transcript in the Termination Region	IEA	Caenorhabditis elegans	6	0	0	0
Q9N4C2	R-CEL-109688	http://www.reactome.org/PathwayBrowser/#/R-CEL-109688	Cleavage of Growing Transcript in the Termination Region	IEA	Caenorhabditis elegans	4	0	0	0
Q9N5E3	R-CEL-109688	http://www.reactome.org/PathwayBrowser/#/R-CEL-109688	Cleavage of Growing Transcript in the Termination Region	IEA	Caenorhabditis elegans	3	0	0	0
Q9NEW6	R-CEL-109688	http://www.reactome.org/PathwayBrowser/#/R-CEL-109688	Cleavage of Growing Transcript in the Termination Region	IEA	Caenorhabditis elegans	5	0	0	0
Q9U2P3	R-CEL-109688	http://www.reactome.org/PathwayBrowser/#/R-CEL-109688	Cleavage of Growing Transcript in the Termination Region	IEA	Caenorhabditis elegans	4	0	0	0
Q9U2U0	R-CEL-109688	http://www.reactome.org/PathwayBrowser/#/R-CEL-109688	Cleavage of Growing Transcript in the Termination Region	IEA	Caenorhabditis elegans	4	0	0	0
Q9U3S3	R-CEL-109688	http://www.reactome.org/PathwayBrowser/#/R-CEL-109688	Cleavage of Growing Transcript in the Termination Region	IEA	Caenorhabditis elegans	3	0	0	0
V6CJF0	R-CEL-109688	http://www.reactome.org/PathwayBrowser/#/R-CEL-109688	Cleavage of Growing Transcript in the Termination Region	IEA	Caenorhabditis elegans	6	0	0	0
E9P864	R-CEL-109704	http://www.reactome.org/PathwayBrowser/#/R-CEL-109704	PI3K Cascade	IEA	Caenorhabditis elegans	8	0	0	0
E9P864	R-CEL-109704	http://www.reactome.org/PathwayBrowser/#/R-CEL-109704	PI3K Cascade	IEA	Caenorhabditis elegans	8	0	0	0
H2L281	R-CEL-109704	http://www.reactome.org/PathwayBrowser/#/R-CEL-109704	PI3K Cascade	IEA	Caenorhabditis elegans	6	0	0	0
H2L281	R-CEL-109704	http://www.reactome.org/PathwayBrowser/#/R-CEL-109704	PI3K Cascade	IEA	Caenorhabditis elegans	6	0	0	0
Q22187	R-CEL-109704	http://www.reactome.org/PathwayBrowser/#/R-CEL-109704	PI3K Cascade	IEA	Caenorhabditis elegans	6	0	0	0
Q22187	R-CEL-109704	http://www.reactome.org/PathwayBrowser/#/R-CEL-109704	PI3K Cascade	IEA	Caenorhabditis elegans	6	0	0	0
Q23669	R-CEL-109704	http://www.reactome.org/PathwayBrowser/#/R-CEL-109704	PI3K Cascade	IEA	Caenorhabditis elegans	8	0	0	0
Q23669	R-CEL-109704	http://www.reactome.org/PathwayBrowser/#/R-CEL-109704	PI3K Cascade	IEA	Caenorhabditis elegans	8	0	0	0
Q5TYK9	R-CEL-109704	http://www.reactome.org/PathwayBrowser/#/R-CEL-109704	PI3K Cascade	IEA	Caenorhabditis elegans	8	0	0	0
Q5TYK9	R-CEL-109704	http://www.reactome.org/PathwayBrowser/#/R-CEL-109704	PI3K Cascade	IEA	Caenorhabditis elegans	8	0	0	0
Q9BIW9	R-CEL-109704	http://www.reactome.org/PathwayBrowser/#/R-CEL-109704	PI3K Cascade	IEA	Caenorhabditis elegans	6	0	0	0
Q9BIW9	R-CEL-109704	http://www.reactome.org/PathwayBrowser/#/R-CEL-109704	PI3K Cascade	IEA	Caenorhabditis elegans	6	0	0	0
Q9N5Z3	R-CEL-109704	http://www.reactome.org/PathwayBrowser/#/R-CEL-109704	PI3K Cascade	IEA	Caenorhabditis elegans	6	0	0	0
Q9N5Z3	R-CEL-109704	http://www.reactome.org/PathwayBrowser/#/R-CEL-109704	PI3K Cascade	IEA	Caenorhabditis elegans	6	0	0	0
Q9TXI6	R-CEL-109704	http://www.reactome.org/PathwayBrowser/#/R-CEL-109704	PI3K Cascade	IEA	Caenorhabditis elegans	8	0	0	0
Q9TXI6	R-CEL-109704	http://www.reactome.org/PathwayBrowser/#/R-CEL-109704	PI3K Cascade	IEA	Caenorhabditis elegans	8	0	0	0
Q9TXI7	R-CEL-109704	http://www.reactome.org/PathwayBrowser/#/R-CEL-109704	PI3K Cascade	IEA	Caenorhabditis elegans	8	0	0	0
Q9TXI7	R-CEL-109704	http://www.reactome.org/PathwayBrowser/#/R-CEL-109704	PI3K Cascade	IEA	Caenorhabditis elegans	8	0	0	0
Q9XZR0	R-CEL-109704	http://www.reactome.org/PathwayBrowser/#/R-CEL-109704	PI3K Cascade	IEA	Caenorhabditis elegans	8	0	0	0
Q9XZR0	R-CEL-109704	http://www.reactome.org/PathwayBrowser/#/R-CEL-109704	PI3K Cascade	IEA	Caenorhabditis elegans	8	0	0	0
P34556	R-CEL-110056	http://www.reactome.org/PathwayBrowser/#/R-CEL-110056	MAPK3 (ERK1) activation	IEA	Caenorhabditis elegans	10	0	0	0
Q10664	R-CEL-110056	http://www.reactome.org/PathwayBrowser/#/R-CEL-110056	MAPK3 (ERK1) activation	IEA	Caenorhabditis elegans	5	0	0	0
O02115	R-CEL-110312	http://www.reactome.org/PathwayBrowser/#/R-CEL-110312	Translesion synthesis by REV1	IEA	Caenorhabditis elegans	15	0	0	0
O44175	R-CEL-110312	http://www.reactome.org/PathwayBrowser/#/R-CEL-110312	Translesion synthesis by REV1	IEA	Caenorhabditis elegans	9	0	0	0
P34429	R-CEL-110312	http://www.reactome.org/PathwayBrowser/#/R-CEL-110312	Translesion synthesis by REV1	IEA	Caenorhabditis elegans	9	0	0	0
P37165	R-CEL-110312	http://www.reactome.org/PathwayBrowser/#/R-CEL-110312	Translesion synthesis by REV1	IEA	Caenorhabditis elegans	51	0	0	0
P49632	R-CEL-110312	http://www.reactome.org/PathwayBrowser/#/R-CEL-110312	Translesion synthesis by REV1	IEA	Caenorhabditis elegans	48	0	0	0
P53016	R-CEL-110312	http://www.reactome.org/PathwayBrowser/#/R-CEL-110312	Translesion synthesis by REV1	IEA	Caenorhabditis elegans	9	0	0	0
Q09557	R-CEL-110312	http://www.reactome.org/PathwayBrowser/#/R-CEL-110312	Translesion synthesis by REV1	IEA	Caenorhabditis elegans	51	0	0	0
Q09615	R-CEL-110312	http://www.reactome.org/PathwayBrowser/#/R-CEL-110312	Translesion synthesis by REV1	IEA	Caenorhabditis elegans	2	0	0	0
Q18547	R-CEL-110312	http://www.reactome.org/PathwayBrowser/#/R-CEL-110312	Translesion synthesis by REV1	IEA	Caenorhabditis elegans	9	0	0	0
Q18841	R-CEL-110312	http://www.reactome.org/PathwayBrowser/#/R-CEL-110312	Translesion synthesis by REV1	IEA	Caenorhabditis elegans	8	0	0	0
Q19537	R-CEL-110312	http://www.reactome.org/PathwayBrowser/#/R-CEL-110312	Translesion synthesis by REV1	IEA	Caenorhabditis elegans	8	0	0	0
Q9XUT3	R-CEL-110312	http://www.reactome.org/PathwayBrowser/#/R-CEL-110312	Translesion synthesis by REV1	IEA	Caenorhabditis elegans	51	0	0	0
G5EFY1	R-CEL-110320	http://www.reactome.org/PathwayBrowser/#/R-CEL-110320	Translesion Synthesis by POLH	IEA	Caenorhabditis elegans	1	0	0	0
H2KYU6	R-CEL-110320	http://www.reactome.org/PathwayBrowser/#/R-CEL-110320	Translesion Synthesis by POLH	IEA	Caenorhabditis elegans	1	0	0	0
O01894	R-CEL-110320	http://www.reactome.org/PathwayBrowser/#/R-CEL-110320	Translesion Synthesis by POLH	IEA	Caenorhabditis elegans	1	0	0	0
O02115	R-CEL-110320	http://www.reactome.org/PathwayBrowser/#/R-CEL-110320	Translesion Synthesis by POLH	IEA	Caenorhabditis elegans	15	0	0	0
O44175	R-CEL-110320	http://www.reactome.org/PathwayBrowser/#/R-CEL-110320	Translesion Synthesis by POLH	IEA	Caenorhabditis elegans	9	0	0	0
P34429	R-CEL-110320	http://www.reactome.org/PathwayBrowser/#/R-CEL-110320	Translesion Synthesis by POLH	IEA	Caenorhabditis elegans	9	0	0	0
P37165	R-CEL-110320	http://www.reactome.org/PathwayBrowser/#/R-CEL-110320	Translesion Synthesis by POLH	IEA	Caenorhabditis elegans	51	0	0	0
P49632	R-CEL-110320	http://www.reactome.org/PathwayBrowser/#/R-CEL-110320	Translesion Synthesis by POLH	IEA	Caenorhabditis elegans	48	0	0	0
P53016	R-CEL-110320	http://www.reactome.org/PathwayBrowser/#/R-CEL-110320	Translesion Synthesis by POLH	IEA	Caenorhabditis elegans	9	0	0	0
P54811	R-CEL-110320	http://www.reactome.org/PathwayBrowser/#/R-CEL-110320	Translesion Synthesis by POLH	IEA	Caenorhabditis elegans	2	0	0	0
P54812	R-CEL-110320	http://www.reactome.org/PathwayBrowser/#/R-CEL-110320	Translesion Synthesis by POLH	IEA	Caenorhabditis elegans	2	0	0	0
Q09557	R-CEL-110320	http://www.reactome.org/PathwayBrowser/#/R-CEL-110320	Translesion Synthesis by POLH	IEA	Caenorhabditis elegans	51	0	0	0
Q18547	R-CEL-110320	http://www.reactome.org/PathwayBrowser/#/R-CEL-110320	Translesion Synthesis by POLH	IEA	Caenorhabditis elegans	9	0	0	0
Q18841	R-CEL-110320	http://www.reactome.org/PathwayBrowser/#/R-CEL-110320	Translesion Synthesis by POLH	IEA	Caenorhabditis elegans	8	0	0	0
Q19537	R-CEL-110320	http://www.reactome.org/PathwayBrowser/#/R-CEL-110320	Translesion Synthesis by POLH	IEA	Caenorhabditis elegans	8	0	0	0
Q19584	R-CEL-110320	http://www.reactome.org/PathwayBrowser/#/R-CEL-110320	Translesion Synthesis by POLH	IEA	Caenorhabditis elegans	1	0	0	0
Q22557	R-CEL-110320	http://www.reactome.org/PathwayBrowser/#/R-CEL-110320	Translesion Synthesis by POLH	IEA	Caenorhabditis elegans	1	0	0	0
Q95QZ7	R-CEL-110320	http://www.reactome.org/PathwayBrowser/#/R-CEL-110320	Translesion Synthesis by POLH	IEA	Caenorhabditis elegans	1	0	0	0
Q95QZ9	R-CEL-110320	http://www.reactome.org/PathwayBrowser/#/R-CEL-110320	Translesion Synthesis by POLH	IEA	Caenorhabditis elegans	1	0	0	0
Q9XUT3	R-CEL-110320	http://www.reactome.org/PathwayBrowser/#/R-CEL-110320	Translesion Synthesis by POLH	IEA	Caenorhabditis elegans	51	0	0	0
H8ESG8	R-CEL-110329	http://www.reactome.org/PathwayBrowser/#/R-CEL-110329	Cleavage of the damaged pyrimidine	IEA	Caenorhabditis elegans	2	0	0	0
H8ESG9	R-CEL-110329	http://www.reactome.org/PathwayBrowser/#/R-CEL-110329	Cleavage of the damaged pyrimidine	IEA	Caenorhabditis elegans	2	0	0	0
P54137	R-CEL-110329	http://www.reactome.org/PathwayBrowser/#/R-CEL-110329	Cleavage of the damaged pyrimidine	IEA	Caenorhabditis elegans	2	0	0	0
Q95Q13	R-CEL-110329	http://www.reactome.org/PathwayBrowser/#/R-CEL-110329	Cleavage of the damaged pyrimidine	IEA	Caenorhabditis elegans	2	0	0	0
Q9U221	R-CEL-110329	http://www.reactome.org/PathwayBrowser/#/R-CEL-110329	Cleavage of the damaged pyrimidine	IEA	Caenorhabditis elegans	2	0	0	0
G5EBR7	R-CEL-110357	http://www.reactome.org/PathwayBrowser/#/R-CEL-110357	Displacement of DNA glycosylase by APEX1	IEA	Caenorhabditis elegans	3	0	0	0
H8ESG8	R-CEL-110357	http://www.reactome.org/PathwayBrowser/#/R-CEL-110357	Displacement of DNA glycosylase by APEX1	IEA	Caenorhabditis elegans	2	0	0	0
H8ESG9	R-CEL-110357	http://www.reactome.org/PathwayBrowser/#/R-CEL-110357	Displacement of DNA glycosylase by APEX1	IEA	Caenorhabditis elegans	2	0	0	0
P54137	R-CEL-110357	http://www.reactome.org/PathwayBrowser/#/R-CEL-110357	Displacement of DNA glycosylase by APEX1	IEA	Caenorhabditis elegans	2	0	0	0
Q564V5	R-CEL-110357	http://www.reactome.org/PathwayBrowser/#/R-CEL-110357	Displacement of DNA glycosylase by APEX1	IEA	Caenorhabditis elegans	3	0	0	0
Q95Q13	R-CEL-110357	http://www.reactome.org/PathwayBrowser/#/R-CEL-110357	Displacement of DNA glycosylase by APEX1	IEA	Caenorhabditis elegans	2	0	0	0
Q9U221	R-CEL-110357	http://www.reactome.org/PathwayBrowser/#/R-CEL-110357	Displacement of DNA glycosylase by APEX1	IEA	Caenorhabditis elegans	2	0	0	0
Q867X0	R-CEL-110362	http://www.reactome.org/PathwayBrowser/#/R-CEL-110362	POLB-Dependent Long Patch Base Excision Repair	IEA	Caenorhabditis elegans	1	0	0	0
Q9N4D2	R-CEL-110362	http://www.reactome.org/PathwayBrowser/#/R-CEL-110362	POLB-Dependent Long Patch Base Excision Repair	IEA	Caenorhabditis elegans	5	0	0	0
Q9N5L4	R-CEL-110362	http://www.reactome.org/PathwayBrowser/#/R-CEL-110362	POLB-Dependent Long Patch Base Excision Repair	IEA	Caenorhabditis elegans	1	0	0	0
G5EBR7	R-CEL-110373	http://www.reactome.org/PathwayBrowser/#/R-CEL-110373	Resolution of AP sites via the multiple-nucleotide patch replacement pathway	IEA	Caenorhabditis elegans	3	0	0	0
Q564V5	R-CEL-110373	http://www.reactome.org/PathwayBrowser/#/R-CEL-110373	Resolution of AP sites via the multiple-nucleotide patch replacement pathway	IEA	Caenorhabditis elegans	3	0	0	0
P19974	R-CEL-111457	http://www.reactome.org/PathwayBrowser/#/R-CEL-111457	Release of apoptotic factors from the mitochondria	IEA	Caenorhabditis elegans	3	0	0	0
Q23240	R-CEL-111457	http://www.reactome.org/PathwayBrowser/#/R-CEL-111457	Release of apoptotic factors from the mitochondria	IEA	Caenorhabditis elegans	3	0	0	0
G5EBM1	R-CEL-111458	http://www.reactome.org/PathwayBrowser/#/R-CEL-111458	Formation of apoptosome	IEA	Caenorhabditis elegans	3	0	0	0
G5EBN4	R-CEL-111458	http://www.reactome.org/PathwayBrowser/#/R-CEL-111458	Formation of apoptosome	IEA	Caenorhabditis elegans	3	0	0	0
G5ECW5	R-CEL-111458	http://www.reactome.org/PathwayBrowser/#/R-CEL-111458	Formation of apoptosome	IEA	Caenorhabditis elegans	3	0	0	0
G5ECY5	R-CEL-111458	http://www.reactome.org/PathwayBrowser/#/R-CEL-111458	Formation of apoptosome	IEA	Caenorhabditis elegans	3	0	0	0
G5EG94	R-CEL-111458	http://www.reactome.org/PathwayBrowser/#/R-CEL-111458	Formation of apoptosome	IEA	Caenorhabditis elegans	3	0	0	0
I2HAI7	R-CEL-111458	http://www.reactome.org/PathwayBrowser/#/R-CEL-111458	Formation of apoptosome	IEA	Caenorhabditis elegans	1	0	0	0
N1NTL8	R-CEL-111458	http://www.reactome.org/PathwayBrowser/#/R-CEL-111458	Formation of apoptosome	IEA	Caenorhabditis elegans	1	0	0	0
O62471	R-CEL-111458	http://www.reactome.org/PathwayBrowser/#/R-CEL-111458	Formation of apoptosome	IEA	Caenorhabditis elegans	1	0	0	0
P19974	R-CEL-111458	http://www.reactome.org/PathwayBrowser/#/R-CEL-111458	Formation of apoptosome	IEA	Caenorhabditis elegans	3	0	0	0
P42573	R-CEL-111458	http://www.reactome.org/PathwayBrowser/#/R-CEL-111458	Formation of apoptosome	IEA	Caenorhabditis elegans	3	0	0	0
Q23240	R-CEL-111458	http://www.reactome.org/PathwayBrowser/#/R-CEL-111458	Formation of apoptosome	IEA	Caenorhabditis elegans	3	0	0	0
Q9TZP5	R-CEL-111458	http://www.reactome.org/PathwayBrowser/#/R-CEL-111458	Formation of apoptosome	IEA	Caenorhabditis elegans	3	0	0	0
O16305	R-CEL-111933	http://www.reactome.org/PathwayBrowser/#/R-CEL-111933	Calmodulin induced events	IEA	Caenorhabditis elegans	22	0	0	0
O16305	R-CEL-111933	http://www.reactome.org/PathwayBrowser/#/R-CEL-111933	Calmodulin induced events	IEA	Caenorhabditis elegans	22	0	0	0
P34722	R-CEL-111933	http://www.reactome.org/PathwayBrowser/#/R-CEL-111933	Calmodulin induced events	IEA	Caenorhabditis elegans	10	0	0	0
P34722	R-CEL-111933	http://www.reactome.org/PathwayBrowser/#/R-CEL-111933	Calmodulin induced events	IEA	Caenorhabditis elegans	10	0	0	0
P90980	R-CEL-111933	http://www.reactome.org/PathwayBrowser/#/R-CEL-111933	Calmodulin induced events	IEA	Caenorhabditis elegans	11	0	0	0
P90980	R-CEL-111933	http://www.reactome.org/PathwayBrowser/#/R-CEL-111933	Calmodulin induced events	IEA	Caenorhabditis elegans	11	0	0	0
Q09639	R-CEL-111933	http://www.reactome.org/PathwayBrowser/#/R-CEL-111933	Calmodulin induced events	IEA	Caenorhabditis elegans	5	0	0	0
Q09639	R-CEL-111933	http://www.reactome.org/PathwayBrowser/#/R-CEL-111933	Calmodulin induced events	IEA	Caenorhabditis elegans	5	0	0	0
Q95XF6	R-CEL-111933	http://www.reactome.org/PathwayBrowser/#/R-CEL-111933	Calmodulin induced events	IEA	Caenorhabditis elegans	22	0	0	0
Q95XF6	R-CEL-111933	http://www.reactome.org/PathwayBrowser/#/R-CEL-111933	Calmodulin induced events	IEA	Caenorhabditis elegans	22	0	0	0
O16305	R-CEL-111957	http://www.reactome.org/PathwayBrowser/#/R-CEL-111957	Cam-PDE 1 activation	IEA	Caenorhabditis elegans	22	0	0	0
O16305	R-CEL-111957	http://www.reactome.org/PathwayBrowser/#/R-CEL-111957	Cam-PDE 1 activation	IEA	Caenorhabditis elegans	22	0	0	0
O18696	R-CEL-111957	http://www.reactome.org/PathwayBrowser/#/R-CEL-111957	Cam-PDE 1 activation	IEA	Caenorhabditis elegans	4	0	0	0
O18696	R-CEL-111957	http://www.reactome.org/PathwayBrowser/#/R-CEL-111957	Cam-PDE 1 activation	IEA	Caenorhabditis elegans	4	0	0	0
Q95XF6	R-CEL-111957	http://www.reactome.org/PathwayBrowser/#/R-CEL-111957	Cam-PDE 1 activation	IEA	Caenorhabditis elegans	22	0	0	0
Q95XF6	R-CEL-111957	http://www.reactome.org/PathwayBrowser/#/R-CEL-111957	Cam-PDE 1 activation	IEA	Caenorhabditis elegans	22	0	0	0
G5EBH0	R-CEL-112043	http://www.reactome.org/PathwayBrowser/#/R-CEL-112043	PLC beta mediated events	IEA	Caenorhabditis elegans	4	0	0	0
P51875	R-CEL-112043	http://www.reactome.org/PathwayBrowser/#/R-CEL-112043	PLC beta mediated events	IEA	Caenorhabditis elegans	2	0	0	0
Q9BIG5	R-CEL-112043	http://www.reactome.org/PathwayBrowser/#/R-CEL-112043	PLC beta mediated events	IEA	Caenorhabditis elegans	7	0	0	0
Q9N2V6	R-CEL-112043	http://www.reactome.org/PathwayBrowser/#/R-CEL-112043	PLC beta mediated events	IEA	Caenorhabditis elegans	7	0	0	0
Q93533	R-CEL-112308	http://www.reactome.org/PathwayBrowser/#/R-CEL-112308	Depolarization of the Presynaptic Terminal Triggers the Opening of Calcium Channels	IEA	Caenorhabditis elegans	1	0	0	0
Q9GUI1	R-CEL-112310	http://www.reactome.org/PathwayBrowser/#/R-CEL-112310	Neurotransmitter Release Cycle	IEA	Caenorhabditis elegans	1	0	0	0
G5EDN1	R-CEL-112311	http://www.reactome.org/PathwayBrowser/#/R-CEL-112311	Neurotransmitter Clearance In The Synaptic Cleft	IEA	Caenorhabditis elegans	2	0	0	0
G5EDV9	R-CEL-112311	http://www.reactome.org/PathwayBrowser/#/R-CEL-112311	Neurotransmitter Clearance In The Synaptic Cleft	IEA	Caenorhabditis elegans	2	0	0	0
O61459	R-CEL-112311	http://www.reactome.org/PathwayBrowser/#/R-CEL-112311	Neurotransmitter Clearance In The Synaptic Cleft	IEA	Caenorhabditis elegans	2	0	0	0
P38433	R-CEL-112311	http://www.reactome.org/PathwayBrowser/#/R-CEL-112311	Neurotransmitter Clearance In The Synaptic Cleft	IEA	Caenorhabditis elegans	2	0	0	0
Q9U295	R-CEL-112311	http://www.reactome.org/PathwayBrowser/#/R-CEL-112311	Neurotransmitter Clearance In The Synaptic Cleft	IEA	Caenorhabditis elegans	2	0	0	0
O01763	R-CEL-112382	http://www.reactome.org/PathwayBrowser/#/R-CEL-112382	Formation of RNA Pol II elongation complex	IEA	Caenorhabditis elegans	14	0	0	0
O02092	R-CEL-112382	http://www.reactome.org/PathwayBrowser/#/R-CEL-112382	Formation of RNA Pol II elongation complex	IEA	Caenorhabditis elegans	18	0	0	0
O17869	R-CEL-112382	http://www.reactome.org/PathwayBrowser/#/R-CEL-112382	Formation of RNA Pol II elongation complex	IEA	Caenorhabditis elegans	5	0	0	0
P16356	R-CEL-112382	http://www.reactome.org/PathwayBrowser/#/R-CEL-112382	Formation of RNA Pol II elongation complex	IEA	Caenorhabditis elegans	18	0	0	0
P34424	R-CEL-112382	http://www.reactome.org/PathwayBrowser/#/R-CEL-112382	Formation of RNA Pol II elongation complex	IEA	Caenorhabditis elegans	5	0	0	0
P34425	R-CEL-112382	http://www.reactome.org/PathwayBrowser/#/R-CEL-112382	Formation of RNA Pol II elongation complex	IEA	Caenorhabditis elegans	5	0	0	0
Q10578	R-CEL-112382	http://www.reactome.org/PathwayBrowser/#/R-CEL-112382	Formation of RNA Pol II elongation complex	IEA	Caenorhabditis elegans	18	0	0	0
Q17558	R-CEL-112382	http://www.reactome.org/PathwayBrowser/#/R-CEL-112382	Formation of RNA Pol II elongation complex	IEA	Caenorhabditis elegans	15	0	0	0
Q17684	R-CEL-112382	http://www.reactome.org/PathwayBrowser/#/R-CEL-112382	Formation of RNA Pol II elongation complex	IEA	Caenorhabditis elegans	20	0	0	0
Q19826	R-CEL-112382	http://www.reactome.org/PathwayBrowser/#/R-CEL-112382	Formation of RNA Pol II elongation complex	IEA	Caenorhabditis elegans	20	0	0	0
Q21338	R-CEL-112382	http://www.reactome.org/PathwayBrowser/#/R-CEL-112382	Formation of RNA Pol II elongation complex	IEA	Caenorhabditis elegans	7	0	0	0
Q8MYM8	R-CEL-112382	http://www.reactome.org/PathwayBrowser/#/R-CEL-112382	Formation of RNA Pol II elongation complex	IEA	Caenorhabditis elegans	15	0	0	0
Q93338	R-CEL-112382	http://www.reactome.org/PathwayBrowser/#/R-CEL-112382	Formation of RNA Pol II elongation complex	IEA	Caenorhabditis elegans	18	0	0	0
Q93594	R-CEL-112382	http://www.reactome.org/PathwayBrowser/#/R-CEL-112382	Formation of RNA Pol II elongation complex	IEA	Caenorhabditis elegans	14	0	0	0
Q95QG8	R-CEL-112382	http://www.reactome.org/PathwayBrowser/#/R-CEL-112382	Formation of RNA Pol II elongation complex	IEA	Caenorhabditis elegans	5	0	0	0
Q965S0	R-CEL-112382	http://www.reactome.org/PathwayBrowser/#/R-CEL-112382	Formation of RNA Pol II elongation complex	IEA	Caenorhabditis elegans	18	0	0	0
Q9GR61	R-CEL-112382	http://www.reactome.org/PathwayBrowser/#/R-CEL-112382	Formation of RNA Pol II elongation complex	IEA	Caenorhabditis elegans	20	0	0	0
Q9N3C9	R-CEL-112382	http://www.reactome.org/PathwayBrowser/#/R-CEL-112382	Formation of RNA Pol II elongation complex	IEA	Caenorhabditis elegans	18	0	0	0
Q9N5K2	R-CEL-112382	http://www.reactome.org/PathwayBrowser/#/R-CEL-112382	Formation of RNA Pol II elongation complex	IEA	Caenorhabditis elegans	20	0	0	0
Q9TVL3	R-CEL-112382	http://www.reactome.org/PathwayBrowser/#/R-CEL-112382	Formation of RNA Pol II elongation complex	IEA	Caenorhabditis elegans	5	0	0	0
Q9TZ93	R-CEL-112382	http://www.reactome.org/PathwayBrowser/#/R-CEL-112382	Formation of RNA Pol II elongation complex	IEA	Caenorhabditis elegans	5	0	0	0
Q9U3I0	R-CEL-112382	http://www.reactome.org/PathwayBrowser/#/R-CEL-112382	Formation of RNA Pol II elongation complex	IEA	Caenorhabditis elegans	20	0	0	0
Q9XVH6	R-CEL-112382	http://www.reactome.org/PathwayBrowser/#/R-CEL-112382	Formation of RNA Pol II elongation complex	IEA	Caenorhabditis elegans	18	0	0	0
X5M5N4	R-CEL-112382	http://www.reactome.org/PathwayBrowser/#/R-CEL-112382	Formation of RNA Pol II elongation complex	IEA	Caenorhabditis elegans	20	0	0	0
O44128	R-CEL-112409	http://www.reactome.org/PathwayBrowser/#/R-CEL-112409	RAF-independent MAPK1/3 activation	IEA	Caenorhabditis elegans	4	0	0	0
P39745	R-CEL-112409	http://www.reactome.org/PathwayBrowser/#/R-CEL-112409	RAF-independent MAPK1/3 activation	IEA	Caenorhabditis elegans	19	0	0	0
V6CIV8	R-CEL-112409	http://www.reactome.org/PathwayBrowser/#/R-CEL-112409	RAF-independent MAPK1/3 activation	IEA	Caenorhabditis elegans	4	0	0	0
P39745	R-CEL-112411	http://www.reactome.org/PathwayBrowser/#/R-CEL-112411	MAPK1 (ERK2) activation	IEA	Caenorhabditis elegans	19	0	0	0
Q10664	R-CEL-112411	http://www.reactome.org/PathwayBrowser/#/R-CEL-112411	MAPK1 (ERK2) activation	IEA	Caenorhabditis elegans	5	0	0	0
D3NQB3	R-CEL-113418	http://www.reactome.org/PathwayBrowser/#/R-CEL-113418	Formation of the Early Elongation Complex	IEA	Caenorhabditis elegans	15	0	0	0
G5EFV5	R-CEL-113418	http://www.reactome.org/PathwayBrowser/#/R-CEL-113418	Formation of the Early Elongation Complex	IEA	Caenorhabditis elegans	16	0	0	0
K8ESJ1	R-CEL-113418	http://www.reactome.org/PathwayBrowser/#/R-CEL-113418	Formation of the Early Elongation Complex	IEA	Caenorhabditis elegans	15	0	0	0
K8F7X5	R-CEL-113418	http://www.reactome.org/PathwayBrowser/#/R-CEL-113418	Formation of the Early Elongation Complex	IEA	Caenorhabditis elegans	15	0	0	0
O01763	R-CEL-113418	http://www.reactome.org/PathwayBrowser/#/R-CEL-113418	Formation of the Early Elongation Complex	IEA	Caenorhabditis elegans	14	0	0	0
O02092	R-CEL-113418	http://www.reactome.org/PathwayBrowser/#/R-CEL-113418	Formation of the Early Elongation Complex	IEA	Caenorhabditis elegans	18	0	0	0
O17245	R-CEL-113418	http://www.reactome.org/PathwayBrowser/#/R-CEL-113418	Formation of the Early Elongation Complex	IEA	Caenorhabditis elegans	15	0	0	0
O44499	R-CEL-113418	http://www.reactome.org/PathwayBrowser/#/R-CEL-113418	Formation of the Early Elongation Complex	IEA	Caenorhabditis elegans	15	0	0	0
P16356	R-CEL-113418	http://www.reactome.org/PathwayBrowser/#/R-CEL-113418	Formation of the Early Elongation Complex	IEA	Caenorhabditis elegans	18	0	0	0
P34567	R-CEL-113418	http://www.reactome.org/PathwayBrowser/#/R-CEL-113418	Formation of the Early Elongation Complex	IEA	Caenorhabditis elegans	15	0	0	0
Q09645	R-CEL-113418	http://www.reactome.org/PathwayBrowser/#/R-CEL-113418	Formation of the Early Elongation Complex	IEA	Caenorhabditis elegans	15	0	0	0
Q10578	R-CEL-113418	http://www.reactome.org/PathwayBrowser/#/R-CEL-113418	Formation of the Early Elongation Complex	IEA	Caenorhabditis elegans	18	0	0	0
Q17558	R-CEL-113418	http://www.reactome.org/PathwayBrowser/#/R-CEL-113418	Formation of the Early Elongation Complex	IEA	Caenorhabditis elegans	15	0	0	0
Q17684	R-CEL-113418	http://www.reactome.org/PathwayBrowser/#/R-CEL-113418	Formation of the Early Elongation Complex	IEA	Caenorhabditis elegans	20	0	0	0
Q19826	R-CEL-113418	http://www.reactome.org/PathwayBrowser/#/R-CEL-113418	Formation of the Early Elongation Complex	IEA	Caenorhabditis elegans	20	0	0	0
Q21338	R-CEL-113418	http://www.reactome.org/PathwayBrowser/#/R-CEL-113418	Formation of the Early Elongation Complex	IEA	Caenorhabditis elegans	7	0	0	0
Q7YZG6	R-CEL-113418	http://www.reactome.org/PathwayBrowser/#/R-CEL-113418	Formation of the Early Elongation Complex	IEA	Caenorhabditis elegans	15	0	0	0
Q8MYM8	R-CEL-113418	http://www.reactome.org/PathwayBrowser/#/R-CEL-113418	Formation of the Early Elongation Complex	IEA	Caenorhabditis elegans	15	0	0	0
Q93338	R-CEL-113418	http://www.reactome.org/PathwayBrowser/#/R-CEL-113418	Formation of the Early Elongation Complex	IEA	Caenorhabditis elegans	18	0	0	0
Q93594	R-CEL-113418	http://www.reactome.org/PathwayBrowser/#/R-CEL-113418	Formation of the Early Elongation Complex	IEA	Caenorhabditis elegans	14	0	0	0
Q95PZ4	R-CEL-113418	http://www.reactome.org/PathwayBrowser/#/R-CEL-113418	Formation of the Early Elongation Complex	IEA	Caenorhabditis elegans	15	0	0	0
Q95QG8	R-CEL-113418	http://www.reactome.org/PathwayBrowser/#/R-CEL-113418	Formation of the Early Elongation Complex	IEA	Caenorhabditis elegans	5	0	0	0
Q965S0	R-CEL-113418	http://www.reactome.org/PathwayBrowser/#/R-CEL-113418	Formation of the Early Elongation Complex	IEA	Caenorhabditis elegans	18	0	0	0
Q9GR61	R-CEL-113418	http://www.reactome.org/PathwayBrowser/#/R-CEL-113418	Formation of the Early Elongation Complex	IEA	Caenorhabditis elegans	20	0	0	0
Q9N390	R-CEL-113418	http://www.reactome.org/PathwayBrowser/#/R-CEL-113418	Formation of the Early Elongation Complex	IEA	Caenorhabditis elegans	15	0	0	0
Q9N3C9	R-CEL-113418	http://www.reactome.org/PathwayBrowser/#/R-CEL-113418	Formation of the Early Elongation Complex	IEA	Caenorhabditis elegans	18	0	0	0
Q9N4U0	R-CEL-113418	http://www.reactome.org/PathwayBrowser/#/R-CEL-113418	Formation of the Early Elongation Complex	IEA	Caenorhabditis elegans	15	0	0	0
Q9N5K2	R-CEL-113418	http://www.reactome.org/PathwayBrowser/#/R-CEL-113418	Formation of the Early Elongation Complex	IEA	Caenorhabditis elegans	20	0	0	0
Q9NA35	R-CEL-113418	http://www.reactome.org/PathwayBrowser/#/R-CEL-113418	Formation of the Early Elongation Complex	IEA	Caenorhabditis elegans	15	0	0	0
Q9TZ93	R-CEL-113418	http://www.reactome.org/PathwayBrowser/#/R-CEL-113418	Formation of the Early Elongation Complex	IEA	Caenorhabditis elegans	5	0	0	0
Q9U3I0	R-CEL-113418	http://www.reactome.org/PathwayBrowser/#/R-CEL-113418	Formation of the Early Elongation Complex	IEA	Caenorhabditis elegans	20	0	0	0
Q9XVH6	R-CEL-113418	http://www.reactome.org/PathwayBrowser/#/R-CEL-113418	Formation of the Early Elongation Complex	IEA	Caenorhabditis elegans	18	0	0	0
U4PCA7	R-CEL-113418	http://www.reactome.org/PathwayBrowser/#/R-CEL-113418	Formation of the Early Elongation Complex	IEA	Caenorhabditis elegans	15	0	0	0
X5M5N4	R-CEL-113418	http://www.reactome.org/PathwayBrowser/#/R-CEL-113418	Formation of the Early Elongation Complex	IEA	Caenorhabditis elegans	20	0	0	0
C7IVS4	R-CEL-113501	http://www.reactome.org/PathwayBrowser/#/R-CEL-113501	Inhibition of replication initiation of damaged DNA by RB1/E2F1	IEA	Caenorhabditis elegans	11	0	0	0
G5EDT1	R-CEL-113501	http://www.reactome.org/PathwayBrowser/#/R-CEL-113501	Inhibition of replication initiation of damaged DNA by RB1/E2F1	IEA	Caenorhabditis elegans	4	0	0	0
G5EGK8	R-CEL-113501	http://www.reactome.org/PathwayBrowser/#/R-CEL-113501	Inhibition of replication initiation of damaged DNA by RB1/E2F1	IEA	Caenorhabditis elegans	12	0	0	0
H8W3X6	R-CEL-113501	http://www.reactome.org/PathwayBrowser/#/R-CEL-113501	Inhibition of replication initiation of damaged DNA by RB1/E2F1	IEA	Caenorhabditis elegans	2	0	0	0
O02334	R-CEL-113501	http://www.reactome.org/PathwayBrowser/#/R-CEL-113501	Inhibition of replication initiation of damaged DNA by RB1/E2F1	IEA	Caenorhabditis elegans	9	0	0	0
P34471	R-CEL-113501	http://www.reactome.org/PathwayBrowser/#/R-CEL-113501	Inhibition of replication initiation of damaged DNA by RB1/E2F1	IEA	Caenorhabditis elegans	9	0	0	0
Q09543	R-CEL-113501	http://www.reactome.org/PathwayBrowser/#/R-CEL-113501	Inhibition of replication initiation of damaged DNA by RB1/E2F1	IEA	Caenorhabditis elegans	12	0	0	0
Q17744	R-CEL-113501	http://www.reactome.org/PathwayBrowser/#/R-CEL-113501	Inhibition of replication initiation of damaged DNA by RB1/E2F1	IEA	Caenorhabditis elegans	2	0	0	0
Q21625	R-CEL-113501	http://www.reactome.org/PathwayBrowser/#/R-CEL-113501	Inhibition of replication initiation of damaged DNA by RB1/E2F1	IEA	Caenorhabditis elegans	9	0	0	0
Q9NAH1	R-CEL-113501	http://www.reactome.org/PathwayBrowser/#/R-CEL-113501	Inhibition of replication initiation of damaged DNA by RB1/E2F1	IEA	Caenorhabditis elegans	11	0	0	0
Q9TZ34	R-CEL-113501	http://www.reactome.org/PathwayBrowser/#/R-CEL-113501	Inhibition of replication initiation of damaged DNA by RB1/E2F1	IEA	Caenorhabditis elegans	9	0	0	0
O44552	R-CEL-113507	http://www.reactome.org/PathwayBrowser/#/R-CEL-113507	E2F-enabled inhibition of pre-replication complex formation	IEA	Caenorhabditis elegans	11	0	0	0
O44628	R-CEL-113507	http://www.reactome.org/PathwayBrowser/#/R-CEL-113507	E2F-enabled inhibition of pre-replication complex formation	IEA	Caenorhabditis elegans	11	0	0	0
O45926	R-CEL-113507	http://www.reactome.org/PathwayBrowser/#/R-CEL-113507	E2F-enabled inhibition of pre-replication complex formation	IEA	Caenorhabditis elegans	7	0	0	0
P30634	R-CEL-113507	http://www.reactome.org/PathwayBrowser/#/R-CEL-113507	E2F-enabled inhibition of pre-replication complex formation	IEA	Caenorhabditis elegans	11	0	0	0
P34556	R-CEL-113507	http://www.reactome.org/PathwayBrowser/#/R-CEL-113507	E2F-enabled inhibition of pre-replication complex formation	IEA	Caenorhabditis elegans	10	0	0	0
Q10653	R-CEL-113507	http://www.reactome.org/PathwayBrowser/#/R-CEL-113507	E2F-enabled inhibition of pre-replication complex formation	IEA	Caenorhabditis elegans	7	0	0	0
Q21762	R-CEL-113507	http://www.reactome.org/PathwayBrowser/#/R-CEL-113507	E2F-enabled inhibition of pre-replication complex formation	IEA	Caenorhabditis elegans	11	0	0	0
Q9BLB5	R-CEL-113507	http://www.reactome.org/PathwayBrowser/#/R-CEL-113507	E2F-enabled inhibition of pre-replication complex formation	IEA	Caenorhabditis elegans	7	0	0	0
A5HWA6	R-CEL-113510	http://www.reactome.org/PathwayBrowser/#/R-CEL-113510	E2F mediated regulation of DNA replication	IEA	Caenorhabditis elegans	5	0	0	0
A5HWA7	R-CEL-113510	http://www.reactome.org/PathwayBrowser/#/R-CEL-113510	E2F mediated regulation of DNA replication	IEA	Caenorhabditis elegans	5	0	0	0
A5HWA8	R-CEL-113510	http://www.reactome.org/PathwayBrowser/#/R-CEL-113510	E2F mediated regulation of DNA replication	IEA	Caenorhabditis elegans	5	0	0	0
C7IVS4	R-CEL-113510	http://www.reactome.org/PathwayBrowser/#/R-CEL-113510	E2F mediated regulation of DNA replication	IEA	Caenorhabditis elegans	11	0	0	0
O01501	R-CEL-113510	http://www.reactome.org/PathwayBrowser/#/R-CEL-113510	E2F mediated regulation of DNA replication	IEA	Caenorhabditis elegans	2	0	0	0
O02115	R-CEL-113510	http://www.reactome.org/PathwayBrowser/#/R-CEL-113510	E2F mediated regulation of DNA replication	IEA	Caenorhabditis elegans	15	0	0	0
P34556	R-CEL-113510	http://www.reactome.org/PathwayBrowser/#/R-CEL-113510	E2F mediated regulation of DNA replication	IEA	Caenorhabditis elegans	10	0	0	0
P42170	R-CEL-113510	http://www.reactome.org/PathwayBrowser/#/R-CEL-113510	E2F mediated regulation of DNA replication	IEA	Caenorhabditis elegans	3	0	0	0
P91155	R-CEL-113510	http://www.reactome.org/PathwayBrowser/#/R-CEL-113510	E2F mediated regulation of DNA replication	IEA	Caenorhabditis elegans	7	0	0	0
Q22703	R-CEL-113510	http://www.reactome.org/PathwayBrowser/#/R-CEL-113510	E2F mediated regulation of DNA replication	IEA	Caenorhabditis elegans	3	0	0	0
Q7JMR0	R-CEL-113510	http://www.reactome.org/PathwayBrowser/#/R-CEL-113510	E2F mediated regulation of DNA replication	IEA	Caenorhabditis elegans	2	0	0	0
Q86S68	R-CEL-113510	http://www.reactome.org/PathwayBrowser/#/R-CEL-113510	E2F mediated regulation of DNA replication	IEA	Caenorhabditis elegans	2	0	0	0
Q93341	R-CEL-113510	http://www.reactome.org/PathwayBrowser/#/R-CEL-113510	E2F mediated regulation of DNA replication	IEA	Caenorhabditis elegans	3	0	0	0
Q9BIE8	R-CEL-113510	http://www.reactome.org/PathwayBrowser/#/R-CEL-113510	E2F mediated regulation of DNA replication	IEA	Caenorhabditis elegans	5	0	0	0
Q9N588	R-CEL-113510	http://www.reactome.org/PathwayBrowser/#/R-CEL-113510	E2F mediated regulation of DNA replication	IEA	Caenorhabditis elegans	3	0	0	0
Q9NAH1	R-CEL-113510	http://www.reactome.org/PathwayBrowser/#/R-CEL-113510	E2F mediated regulation of DNA replication	IEA	Caenorhabditis elegans	11	0	0	0
Q9U289	R-CEL-113510	http://www.reactome.org/PathwayBrowser/#/R-CEL-113510	E2F mediated regulation of DNA replication	IEA	Caenorhabditis elegans	5	0	0	0
Q9Y052	R-CEL-113510	http://www.reactome.org/PathwayBrowser/#/R-CEL-113510	E2F mediated regulation of DNA replication	IEA	Caenorhabditis elegans	3	0	0	0
H2KYI9	R-CEL-114508	http://www.reactome.org/PathwayBrowser/#/R-CEL-114508	Effects of PIP2 hydrolysis	IEA	Caenorhabditis elegans	1	0	0	0
P34586	R-CEL-114508	http://www.reactome.org/PathwayBrowser/#/R-CEL-114508	Effects of PIP2 hydrolysis	IEA	Caenorhabditis elegans	3	0	0	0
P34722	R-CEL-114508	http://www.reactome.org/PathwayBrowser/#/R-CEL-114508	Effects of PIP2 hydrolysis	IEA	Caenorhabditis elegans	10	0	0	0
P34885	R-CEL-114508	http://www.reactome.org/PathwayBrowser/#/R-CEL-114508	Effects of PIP2 hydrolysis	IEA	Caenorhabditis elegans	3	0	0	0
Q03603	R-CEL-114508	http://www.reactome.org/PathwayBrowser/#/R-CEL-114508	Effects of PIP2 hydrolysis	IEA	Caenorhabditis elegans	1	0	0	0
Q10024	R-CEL-114508	http://www.reactome.org/PathwayBrowser/#/R-CEL-114508	Effects of PIP2 hydrolysis	IEA	Caenorhabditis elegans	1	0	0	0
Q17860	R-CEL-114508	http://www.reactome.org/PathwayBrowser/#/R-CEL-114508	Effects of PIP2 hydrolysis	IEA	Caenorhabditis elegans	1	0	0	0
Q58AU4	R-CEL-114508	http://www.reactome.org/PathwayBrowser/#/R-CEL-114508	Effects of PIP2 hydrolysis	IEA	Caenorhabditis elegans	1	0	0	0
Q58AU5	R-CEL-114508	http://www.reactome.org/PathwayBrowser/#/R-CEL-114508	Effects of PIP2 hydrolysis	IEA	Caenorhabditis elegans	1	0	0	0
Q58AU6	R-CEL-114508	http://www.reactome.org/PathwayBrowser/#/R-CEL-114508	Effects of PIP2 hydrolysis	IEA	Caenorhabditis elegans	1	0	0	0
Q7JNZ1	R-CEL-114508	http://www.reactome.org/PathwayBrowser/#/R-CEL-114508	Effects of PIP2 hydrolysis	IEA	Caenorhabditis elegans	1	0	0	0
Q7Z299	R-CEL-114508	http://www.reactome.org/PathwayBrowser/#/R-CEL-114508	Effects of PIP2 hydrolysis	IEA	Caenorhabditis elegans	1	0	0	0
Q7Z2A0	R-CEL-114508	http://www.reactome.org/PathwayBrowser/#/R-CEL-114508	Effects of PIP2 hydrolysis	IEA	Caenorhabditis elegans	1	0	0	0
Q9Y0A1	R-CEL-114508	http://www.reactome.org/PathwayBrowser/#/R-CEL-114508	Effects of PIP2 hydrolysis	IEA	Caenorhabditis elegans	5	0	0	0
P34815	R-CEL-114516	http://www.reactome.org/PathwayBrowser/#/R-CEL-114516	Disinhibition of SNARE formation	IEA	Caenorhabditis elegans	1	0	0	0
P90980	R-CEL-114516	http://www.reactome.org/PathwayBrowser/#/R-CEL-114516	Disinhibition of SNARE formation	IEA	Caenorhabditis elegans	11	0	0	0
G5EBV3	R-CEL-114604	http://www.reactome.org/PathwayBrowser/#/R-CEL-114604	GPVI-mediated activation cascade	IEA	Caenorhabditis elegans	3	0	0	0
Q03206	R-CEL-114604	http://www.reactome.org/PathwayBrowser/#/R-CEL-114604	GPVI-mediated activation cascade	IEA	Caenorhabditis elegans	21	0	0	0
Q17941	R-CEL-114604	http://www.reactome.org/PathwayBrowser/#/R-CEL-114604	GPVI-mediated activation cascade	IEA	Caenorhabditis elegans	18	0	0	0
Q22038	R-CEL-114604	http://www.reactome.org/PathwayBrowser/#/R-CEL-114604	GPVI-mediated activation cascade	IEA	Caenorhabditis elegans	16	0	0	0
Q22070	R-CEL-114604	http://www.reactome.org/PathwayBrowser/#/R-CEL-114604	GPVI-mediated activation cascade	IEA	Caenorhabditis elegans	4	0	0	0
Q45FX5	R-CEL-114604	http://www.reactome.org/PathwayBrowser/#/R-CEL-114604	GPVI-mediated activation cascade	IEA	Caenorhabditis elegans	10	0	0	0
Q94124	R-CEL-114604	http://www.reactome.org/PathwayBrowser/#/R-CEL-114604	GPVI-mediated activation cascade	IEA	Caenorhabditis elegans	21	0	0	0
Q9XTG7	R-CEL-114604	http://www.reactome.org/PathwayBrowser/#/R-CEL-114604	GPVI-mediated activation cascade	IEA	Caenorhabditis elegans	18	0	0	0
Q9Y1J3	R-CEL-114604	http://www.reactome.org/PathwayBrowser/#/R-CEL-114604	GPVI-mediated activation cascade	IEA	Caenorhabditis elegans	15	0	0	0
A6ZJ62	R-CEL-114608	http://www.reactome.org/PathwayBrowser/#/R-CEL-114608	Platelet degranulation	IEA	Caenorhabditis elegans	1	0	0	0
A7DT28	R-CEL-114608	http://www.reactome.org/PathwayBrowser/#/R-CEL-114608	Platelet degranulation	IEA	Caenorhabditis elegans	1	0	0	0
A9Z1L1	R-CEL-114608	http://www.reactome.org/PathwayBrowser/#/R-CEL-114608	Platelet degranulation	IEA	Caenorhabditis elegans	5	0	0	0
D0IMZ5	R-CEL-114608	http://www.reactome.org/PathwayBrowser/#/R-CEL-114608	Platelet degranulation	IEA	Caenorhabditis elegans	2	0	0	0
D0IMZ6	R-CEL-114608	http://www.reactome.org/PathwayBrowser/#/R-CEL-114608	Platelet degranulation	IEA	Caenorhabditis elegans	2	0	0	0
D0IMZ7	R-CEL-114608	http://www.reactome.org/PathwayBrowser/#/R-CEL-114608	Platelet degranulation	IEA	Caenorhabditis elegans	2	0	0	0
D0IMZ8	R-CEL-114608	http://www.reactome.org/PathwayBrowser/#/R-CEL-114608	Platelet degranulation	IEA	Caenorhabditis elegans	2	0	0	0
D0VWL6	R-CEL-114608	http://www.reactome.org/PathwayBrowser/#/R-CEL-114608	Platelet degranulation	IEA	Caenorhabditis elegans	2	0	0	0
D0VWL7	R-CEL-114608	http://www.reactome.org/PathwayBrowser/#/R-CEL-114608	Platelet degranulation	IEA	Caenorhabditis elegans	2	0	0	0
D0VWL8	R-CEL-114608	http://www.reactome.org/PathwayBrowser/#/R-CEL-114608	Platelet degranulation	IEA	Caenorhabditis elegans	2	0	0	0
G4SLD6	R-CEL-114608	http://www.reactome.org/PathwayBrowser/#/R-CEL-114608	Platelet degranulation	IEA	Caenorhabditis elegans	1	0	0	0
G4SLH0	R-CEL-114608	http://www.reactome.org/PathwayBrowser/#/R-CEL-114608	Platelet degranulation	IEA	Caenorhabditis elegans	1	0	0	0
G5EBT3	R-CEL-114608	http://www.reactome.org/PathwayBrowser/#/R-CEL-114608	Platelet degranulation	IEA	Caenorhabditis elegans	5	0	0	0
G5ECY2	R-CEL-114608	http://www.reactome.org/PathwayBrowser/#/R-CEL-114608	Platelet degranulation	IEA	Caenorhabditis elegans	5	0	0	0
G5EDT5	R-CEL-114608	http://www.reactome.org/PathwayBrowser/#/R-CEL-114608	Platelet degranulation	IEA	Caenorhabditis elegans	1	0	0	0
G5EE40	R-CEL-114608	http://www.reactome.org/PathwayBrowser/#/R-CEL-114608	Platelet degranulation	IEA	Caenorhabditis elegans	5	0	0	0
G5EEX6	R-CEL-114608	http://www.reactome.org/PathwayBrowser/#/R-CEL-114608	Platelet degranulation	IEA	Caenorhabditis elegans	1	0	0	0
G5EF69	R-CEL-114608	http://www.reactome.org/PathwayBrowser/#/R-CEL-114608	Platelet degranulation	IEA	Caenorhabditis elegans	1	0	0	0
G5EFF0	R-CEL-114608	http://www.reactome.org/PathwayBrowser/#/R-CEL-114608	Platelet degranulation	IEA	Caenorhabditis elegans	1	0	0	0
G5EFH4	R-CEL-114608	http://www.reactome.org/PathwayBrowser/#/R-CEL-114608	Platelet degranulation	IEA	Caenorhabditis elegans	5	0	0	0
G5EFK8	R-CEL-114608	http://www.reactome.org/PathwayBrowser/#/R-CEL-114608	Platelet degranulation	IEA	Caenorhabditis elegans	5	0	0	0
H2B4M5	R-CEL-114608	http://www.reactome.org/PathwayBrowser/#/R-CEL-114608	Platelet degranulation	IEA	Caenorhabditis elegans	2	0	0	0
H2B4M7	R-CEL-114608	http://www.reactome.org/PathwayBrowser/#/R-CEL-114608	Platelet degranulation	IEA	Caenorhabditis elegans	2	0	0	0
H2B4M8	R-CEL-114608	http://www.reactome.org/PathwayBrowser/#/R-CEL-114608	Platelet degranulation	IEA	Caenorhabditis elegans	2	0	0	0
H2B4M9	R-CEL-114608	http://www.reactome.org/PathwayBrowser/#/R-CEL-114608	Platelet degranulation	IEA	Caenorhabditis elegans	2	0	0	0
H2B4N0	R-CEL-114608	http://www.reactome.org/PathwayBrowser/#/R-CEL-114608	Platelet degranulation	IEA	Caenorhabditis elegans	2	0	0	0
H2B4N3	R-CEL-114608	http://www.reactome.org/PathwayBrowser/#/R-CEL-114608	Platelet degranulation	IEA	Caenorhabditis elegans	2	0	0	0
H2B4N4	R-CEL-114608	http://www.reactome.org/PathwayBrowser/#/R-CEL-114608	Platelet degranulation	IEA	Caenorhabditis elegans	2	0	0	0
H2B4N5	R-CEL-114608	http://www.reactome.org/PathwayBrowser/#/R-CEL-114608	Platelet degranulation	IEA	Caenorhabditis elegans	2	0	0	0
H2KZT3	R-CEL-114608	http://www.reactome.org/PathwayBrowser/#/R-CEL-114608	Platelet degranulation	IEA	Caenorhabditis elegans	2	0	0	0
H2KZY5	R-CEL-114608	http://www.reactome.org/PathwayBrowser/#/R-CEL-114608	Platelet degranulation	IEA	Caenorhabditis elegans	1	0	0	0
H2L2C8	R-CEL-114608	http://www.reactome.org/PathwayBrowser/#/R-CEL-114608	Platelet degranulation	IEA	Caenorhabditis elegans	3	0	0	0
H2L2C9	R-CEL-114608	http://www.reactome.org/PathwayBrowser/#/R-CEL-114608	Platelet degranulation	IEA	Caenorhabditis elegans	3	0	0	0
O02108	R-CEL-114608	http://www.reactome.org/PathwayBrowser/#/R-CEL-114608	Platelet degranulation	IEA	Caenorhabditis elegans	1	0	0	0
O16305	R-CEL-114608	http://www.reactome.org/PathwayBrowser/#/R-CEL-114608	Platelet degranulation	IEA	Caenorhabditis elegans	22	0	0	0
O16521	R-CEL-114608	http://www.reactome.org/PathwayBrowser/#/R-CEL-114608	Platelet degranulation	IEA	Caenorhabditis elegans	3	0	0	0
O16522	R-CEL-114608	http://www.reactome.org/PathwayBrowser/#/R-CEL-114608	Platelet degranulation	IEA	Caenorhabditis elegans	3	0	0	0
O17365	R-CEL-114608	http://www.reactome.org/PathwayBrowser/#/R-CEL-114608	Platelet degranulation	IEA	Caenorhabditis elegans	5	0	0	0
O17939	R-CEL-114608	http://www.reactome.org/PathwayBrowser/#/R-CEL-114608	Platelet degranulation	IEA	Caenorhabditis elegans	1	0	0	0
P19826	R-CEL-114608	http://www.reactome.org/PathwayBrowser/#/R-CEL-114608	Platelet degranulation	IEA	Caenorhabditis elegans	2	0	0	0
P34446	R-CEL-114608	http://www.reactome.org/PathwayBrowser/#/R-CEL-114608	Platelet degranulation	IEA	Caenorhabditis elegans	10	0	0	0
P34714	R-CEL-114608	http://www.reactome.org/PathwayBrowser/#/R-CEL-114608	Platelet degranulation	IEA	Caenorhabditis elegans	2	0	0	0
P46563	R-CEL-114608	http://www.reactome.org/PathwayBrowser/#/R-CEL-114608	Platelet degranulation	IEA	Caenorhabditis elegans	4	0	0	0
P54216	R-CEL-114608	http://www.reactome.org/PathwayBrowser/#/R-CEL-114608	Platelet degranulation	IEA	Caenorhabditis elegans	4	0	0	0
P91442	R-CEL-114608	http://www.reactome.org/PathwayBrowser/#/R-CEL-114608	Platelet degranulation	IEA	Caenorhabditis elegans	1	1	0	0
P91855	R-CEL-114608	http://www.reactome.org/PathwayBrowser/#/R-CEL-114608	Platelet degranulation	IEA	Caenorhabditis elegans	1	0	0	0
Q10651	R-CEL-114608	http://www.reactome.org/PathwayBrowser/#/R-CEL-114608	Platelet degranulation	IEA	Caenorhabditis elegans	2	0	0	0
Q11124	R-CEL-114608	http://www.reactome.org/PathwayBrowser/#/R-CEL-114608	Platelet degranulation	IEA	Caenorhabditis elegans	2	0	0	0
Q11176	R-CEL-114608	http://www.reactome.org/PathwayBrowser/#/R-CEL-114608	Platelet degranulation	IEA	Caenorhabditis elegans	1	0	0	0
Q17800	R-CEL-114608	http://www.reactome.org/PathwayBrowser/#/R-CEL-114608	Platelet degranulation	IEA	Caenorhabditis elegans	4	0	0	0
Q18109	R-CEL-114608	http://www.reactome.org/PathwayBrowser/#/R-CEL-114608	Platelet degranulation	IEA	Caenorhabditis elegans	2	0	0	0
Q19625	R-CEL-114608	http://www.reactome.org/PathwayBrowser/#/R-CEL-114608	Platelet degranulation	IEA	Caenorhabditis elegans	3	0	0	0
Q19651	R-CEL-114608	http://www.reactome.org/PathwayBrowser/#/R-CEL-114608	Platelet degranulation	IEA	Caenorhabditis elegans	5	0	0	0
Q19983	R-CEL-114608	http://www.reactome.org/PathwayBrowser/#/R-CEL-114608	Platelet degranulation	IEA	Caenorhabditis elegans	1	0	0	0
Q20063	R-CEL-114608	http://www.reactome.org/PathwayBrowser/#/R-CEL-114608	Platelet degranulation	IEA	Caenorhabditis elegans	1	0	0	0
Q20514	R-CEL-114608	http://www.reactome.org/PathwayBrowser/#/R-CEL-114608	Platelet degranulation	IEA	Caenorhabditis elegans	1	0	0	0
Q23158	R-CEL-114608	http://www.reactome.org/PathwayBrowser/#/R-CEL-114608	Platelet degranulation	IEA	Caenorhabditis elegans	3	0	0	0
Q27874	R-CEL-114608	http://www.reactome.org/PathwayBrowser/#/R-CEL-114608	Platelet degranulation	IEA	Caenorhabditis elegans	13	0	0	0
Q3V5H2	R-CEL-114608	http://www.reactome.org/PathwayBrowser/#/R-CEL-114608	Platelet degranulation	IEA	Caenorhabditis elegans	2	0	0	0
Q5ZR75	R-CEL-114608	http://www.reactome.org/PathwayBrowser/#/R-CEL-114608	Platelet degranulation	IEA	Caenorhabditis elegans	12	0	0	0
Q65XY2	R-CEL-114608	http://www.reactome.org/PathwayBrowser/#/R-CEL-114608	Platelet degranulation	IEA	Caenorhabditis elegans	1	0	0	0
Q688B0	R-CEL-114608	http://www.reactome.org/PathwayBrowser/#/R-CEL-114608	Platelet degranulation	IEA	Caenorhabditis elegans	1	0	0	0
Q6QUQ4	R-CEL-114608	http://www.reactome.org/PathwayBrowser/#/R-CEL-114608	Platelet degranulation	IEA	Caenorhabditis elegans	5	0	0	0
Q6QUQ5	R-CEL-114608	http://www.reactome.org/PathwayBrowser/#/R-CEL-114608	Platelet degranulation	IEA	Caenorhabditis elegans	5	0	0	0
Q6QUQ6	R-CEL-114608	http://www.reactome.org/PathwayBrowser/#/R-CEL-114608	Platelet degranulation	IEA	Caenorhabditis elegans	5	0	0	0
Q6QUR0	R-CEL-114608	http://www.reactome.org/PathwayBrowser/#/R-CEL-114608	Platelet degranulation	IEA	Caenorhabditis elegans	5	0	0	0
Q8ISF3	R-CEL-114608	http://www.reactome.org/PathwayBrowser/#/R-CEL-114608	Platelet degranulation	IEA	Caenorhabditis elegans	1	0	0	0
Q8ISF4	R-CEL-114608	http://www.reactome.org/PathwayBrowser/#/R-CEL-114608	Platelet degranulation	IEA	Caenorhabditis elegans	1	0	0	0
Q95QF9	R-CEL-114608	http://www.reactome.org/PathwayBrowser/#/R-CEL-114608	Platelet degranulation	IEA	Caenorhabditis elegans	1	0	0	0
Q95XE8	R-CEL-114608	http://www.reactome.org/PathwayBrowser/#/R-CEL-114608	Platelet degranulation	IEA	Caenorhabditis elegans	1	0	0	0
Q95XF6	R-CEL-114608	http://www.reactome.org/PathwayBrowser/#/R-CEL-114608	Platelet degranulation	IEA	Caenorhabditis elegans	22	0	0	0
Q9N4L6	R-CEL-114608	http://www.reactome.org/PathwayBrowser/#/R-CEL-114608	Platelet degranulation	IEA	Caenorhabditis elegans	1	0	0	0
Q9TYW4	R-CEL-114608	http://www.reactome.org/PathwayBrowser/#/R-CEL-114608	Platelet degranulation	IEA	Caenorhabditis elegans	2	0	0	0
Q9XVI4	R-CEL-114608	http://www.reactome.org/PathwayBrowser/#/R-CEL-114608	Platelet degranulation	IEA	Caenorhabditis elegans	1	0	0	0
Q9XVU8	R-CEL-114608	http://www.reactome.org/PathwayBrowser/#/R-CEL-114608	Platelet degranulation	IEA	Caenorhabditis elegans	3	0	0	0
U4PB53	R-CEL-114608	http://www.reactome.org/PathwayBrowser/#/R-CEL-114608	Platelet degranulation	IEA	Caenorhabditis elegans	2	0	0	0
U4PB58	R-CEL-114608	http://www.reactome.org/PathwayBrowser/#/R-CEL-114608	Platelet degranulation	IEA	Caenorhabditis elegans	2	0	0	0
U4PBJ9	R-CEL-114608	http://www.reactome.org/PathwayBrowser/#/R-CEL-114608	Platelet degranulation	IEA	Caenorhabditis elegans	2	0	0	0
U4PBK4	R-CEL-114608	http://www.reactome.org/PathwayBrowser/#/R-CEL-114608	Platelet degranulation	IEA	Caenorhabditis elegans	2	0	0	0
U4PC94	R-CEL-114608	http://www.reactome.org/PathwayBrowser/#/R-CEL-114608	Platelet degranulation	IEA	Caenorhabditis elegans	1	0	0	0
U4PEE3	R-CEL-114608	http://www.reactome.org/PathwayBrowser/#/R-CEL-114608	Platelet degranulation	IEA	Caenorhabditis elegans	2	0	0	0
U4PEE8	R-CEL-114608	http://www.reactome.org/PathwayBrowser/#/R-CEL-114608	Platelet degranulation	IEA	Caenorhabditis elegans	2	0	0	0
U4PEF1	R-CEL-114608	http://www.reactome.org/PathwayBrowser/#/R-CEL-114608	Platelet degranulation	IEA	Caenorhabditis elegans	2	0	0	0
U4PM01	R-CEL-114608	http://www.reactome.org/PathwayBrowser/#/R-CEL-114608	Platelet degranulation	IEA	Caenorhabditis elegans	2	0	0	0
U4PM04	R-CEL-114608	http://www.reactome.org/PathwayBrowser/#/R-CEL-114608	Platelet degranulation	IEA	Caenorhabditis elegans	2	0	0	0
U4PM09	R-CEL-114608	http://www.reactome.org/PathwayBrowser/#/R-CEL-114608	Platelet degranulation	IEA	Caenorhabditis elegans	2	0	0	0
U4PR92	R-CEL-114608	http://www.reactome.org/PathwayBrowser/#/R-CEL-114608	Platelet degranulation	IEA	Caenorhabditis elegans	2	0	0	0
U4PR97	R-CEL-114608	http://www.reactome.org/PathwayBrowser/#/R-CEL-114608	Platelet degranulation	IEA	Caenorhabditis elegans	2	0	0	0
U4PRA0	R-CEL-114608	http://www.reactome.org/PathwayBrowser/#/R-CEL-114608	Platelet degranulation	IEA	Caenorhabditis elegans	2	0	0	0
P90980	R-CEL-1169091	http://www.reactome.org/PathwayBrowser/#/R-CEL-1169091	Activation of NF-kappaB in B cells	IEA	Caenorhabditis elegans	11	0	0	0
K8FDZ6	R-CEL-1169092	http://www.reactome.org/PathwayBrowser/#/R-CEL-1169092	Activation of RAS in B cells	IEA	Caenorhabditis elegans	4	0	0	0
P22981	R-CEL-1169092	http://www.reactome.org/PathwayBrowser/#/R-CEL-1169092	Activation of RAS in B cells	IEA	Caenorhabditis elegans	19	0	0	0
Q19770	R-CEL-1169092	http://www.reactome.org/PathwayBrowser/#/R-CEL-1169092	Activation of RAS in B cells	IEA	Caenorhabditis elegans	4	0	0	0
A0A061ACQ8	R-CEL-1169408	http://www.reactome.org/PathwayBrowser/#/R-CEL-1169408	ISG15 antiviral mechanism	IEA	Caenorhabditis elegans	3	0	0	0
B5BM23	R-CEL-1169408	http://www.reactome.org/PathwayBrowser/#/R-CEL-1169408	ISG15 antiviral mechanism	IEA	Caenorhabditis elegans	7	0	0	0
B5BM24	R-CEL-1169408	http://www.reactome.org/PathwayBrowser/#/R-CEL-1169408	ISG15 antiviral mechanism	IEA	Caenorhabditis elegans	7	0	0	0
B5BM25	R-CEL-1169408	http://www.reactome.org/PathwayBrowser/#/R-CEL-1169408	ISG15 antiviral mechanism	IEA	Caenorhabditis elegans	7	0	0	0
C1P636	R-CEL-1169408	http://www.reactome.org/PathwayBrowser/#/R-CEL-1169408	ISG15 antiviral mechanism	IEA	Caenorhabditis elegans	2	0	0	0
D3NQB4	R-CEL-1169408	http://www.reactome.org/PathwayBrowser/#/R-CEL-1169408	ISG15 antiviral mechanism	IEA	Caenorhabditis elegans	1	0	0	0
D3NQB5	R-CEL-1169408	http://www.reactome.org/PathwayBrowser/#/R-CEL-1169408	ISG15 antiviral mechanism	IEA	Caenorhabditis elegans	1	0	0	0
O01963	R-CEL-1169408	http://www.reactome.org/PathwayBrowser/#/R-CEL-1169408	ISG15 antiviral mechanism	IEA	Caenorhabditis elegans	1	0	0	0
O01964	R-CEL-1169408	http://www.reactome.org/PathwayBrowser/#/R-CEL-1169408	ISG15 antiviral mechanism	IEA	Caenorhabditis elegans	1	0	0	0
O01965	R-CEL-1169408	http://www.reactome.org/PathwayBrowser/#/R-CEL-1169408	ISG15 antiviral mechanism	IEA	Caenorhabditis elegans	1	0	0	0
O44781	R-CEL-1169408	http://www.reactome.org/PathwayBrowser/#/R-CEL-1169408	ISG15 antiviral mechanism	IEA	Caenorhabditis elegans	6	0	0	0
O44819	R-CEL-1169408	http://www.reactome.org/PathwayBrowser/#/R-CEL-1169408	ISG15 antiviral mechanism	IEA	Caenorhabditis elegans	1	0	0	0
O44820	R-CEL-1169408	http://www.reactome.org/PathwayBrowser/#/R-CEL-1169408	ISG15 antiviral mechanism	IEA	Caenorhabditis elegans	1	0	0	0
O44821	R-CEL-1169408	http://www.reactome.org/PathwayBrowser/#/R-CEL-1169408	ISG15 antiviral mechanism	IEA	Caenorhabditis elegans	1	0	0	0
O45551	R-CEL-1169408	http://www.reactome.org/PathwayBrowser/#/R-CEL-1169408	ISG15 antiviral mechanism	IEA	Caenorhabditis elegans	4	0	0	0
O61955	R-CEL-1169408	http://www.reactome.org/PathwayBrowser/#/R-CEL-1169408	ISG15 antiviral mechanism	IEA	Caenorhabditis elegans	4	0	0	0
P27639	R-CEL-1169408	http://www.reactome.org/PathwayBrowser/#/R-CEL-1169408	ISG15 antiviral mechanism	IEA	Caenorhabditis elegans	4	0	0	0
P56570	R-CEL-1169408	http://www.reactome.org/PathwayBrowser/#/R-CEL-1169408	ISG15 antiviral mechanism	IEA	Caenorhabditis elegans	4	0	0	0
Q20935	R-CEL-1169408	http://www.reactome.org/PathwayBrowser/#/R-CEL-1169408	ISG15 antiviral mechanism	IEA	Caenorhabditis elegans	4	1	0	0
Q21531	R-CEL-1169408	http://www.reactome.org/PathwayBrowser/#/R-CEL-1169408	ISG15 antiviral mechanism	IEA	Caenorhabditis elegans	7	0	0	0
Q21693	R-CEL-1169408	http://www.reactome.org/PathwayBrowser/#/R-CEL-1169408	ISG15 antiviral mechanism	IEA	Caenorhabditis elegans	4	0	0	0
Q22888	R-CEL-1169408	http://www.reactome.org/PathwayBrowser/#/R-CEL-1169408	ISG15 antiviral mechanism	IEA	Caenorhabditis elegans	1	0	0	0
Q27481	R-CEL-1169408	http://www.reactome.org/PathwayBrowser/#/R-CEL-1169408	ISG15 antiviral mechanism	IEA	Caenorhabditis elegans	2	0	0	0
Q2HQK5	R-CEL-1169408	http://www.reactome.org/PathwayBrowser/#/R-CEL-1169408	ISG15 antiviral mechanism	IEA	Caenorhabditis elegans	1	0	0	0
Q3S1J5	R-CEL-1169408	http://www.reactome.org/PathwayBrowser/#/R-CEL-1169408	ISG15 antiviral mechanism	IEA	Caenorhabditis elegans	2	0	0	0
Q7JMF0	R-CEL-1169408	http://www.reactome.org/PathwayBrowser/#/R-CEL-1169408	ISG15 antiviral mechanism	IEA	Caenorhabditis elegans	7	0	0	0
Q8I7N4	R-CEL-1169408	http://www.reactome.org/PathwayBrowser/#/R-CEL-1169408	ISG15 antiviral mechanism	IEA	Caenorhabditis elegans	1	0	0	0
Q9BKW4	R-CEL-1169408	http://www.reactome.org/PathwayBrowser/#/R-CEL-1169408	ISG15 antiviral mechanism	IEA	Caenorhabditis elegans	3	0	0	0
Q9BL61	R-CEL-1169408	http://www.reactome.org/PathwayBrowser/#/R-CEL-1169408	ISG15 antiviral mechanism	IEA	Caenorhabditis elegans	6	0	0	0
Q9NA31	R-CEL-1169408	http://www.reactome.org/PathwayBrowser/#/R-CEL-1169408	ISG15 antiviral mechanism	IEA	Caenorhabditis elegans	1	0	0	0
V6CJF0	R-CEL-1169408	http://www.reactome.org/PathwayBrowser/#/R-CEL-1169408	ISG15 antiviral mechanism	IEA	Caenorhabditis elegans	6	0	0	0
B2MZD0	R-CEL-1222556	http://www.reactome.org/PathwayBrowser/#/R-CEL-1222556	ROS, RNS production in response to bacteria	IEA	Caenorhabditis elegans	3	0	0	0
G5EDB8	R-CEL-1222556	http://www.reactome.org/PathwayBrowser/#/R-CEL-1222556	ROS, RNS production in response to bacteria	IEA	Caenorhabditis elegans	3	0	0	0
G5EDH1	R-CEL-1222556	http://www.reactome.org/PathwayBrowser/#/R-CEL-1222556	ROS, RNS production in response to bacteria	IEA	Caenorhabditis elegans	3	0	0	0
G5EEK9	R-CEL-1222556	http://www.reactome.org/PathwayBrowser/#/R-CEL-1222556	ROS, RNS production in response to bacteria	IEA	Caenorhabditis elegans	3	0	0	0
G5EGP4	R-CEL-1222556	http://www.reactome.org/PathwayBrowser/#/R-CEL-1222556	ROS, RNS production in response to bacteria	IEA	Caenorhabditis elegans	3	0	0	0
P30628	R-CEL-1222556	http://www.reactome.org/PathwayBrowser/#/R-CEL-1222556	ROS, RNS production in response to bacteria	IEA	Caenorhabditis elegans	3	0	0	0
P34462	R-CEL-1222556	http://www.reactome.org/PathwayBrowser/#/R-CEL-1222556	ROS, RNS production in response to bacteria	IEA	Caenorhabditis elegans	3	0	0	0
P34546	R-CEL-1222556	http://www.reactome.org/PathwayBrowser/#/R-CEL-1222556	ROS, RNS production in response to bacteria	IEA	Caenorhabditis elegans	3	0	0	0
P91303	R-CEL-1222556	http://www.reactome.org/PathwayBrowser/#/R-CEL-1222556	ROS, RNS production in response to bacteria	IEA	Caenorhabditis elegans	3	0	0	0
Q19626	R-CEL-1222556	http://www.reactome.org/PathwayBrowser/#/R-CEL-1222556	ROS, RNS production in response to bacteria	IEA	Caenorhabditis elegans	3	0	0	0
Q20591	R-CEL-1222556	http://www.reactome.org/PathwayBrowser/#/R-CEL-1222556	ROS, RNS production in response to bacteria	IEA	Caenorhabditis elegans	3	0	0	0
Q20666	R-CEL-1222556	http://www.reactome.org/PathwayBrowser/#/R-CEL-1222556	ROS, RNS production in response to bacteria	IEA	Caenorhabditis elegans	3	0	0	0
Q21433	R-CEL-1222556	http://www.reactome.org/PathwayBrowser/#/R-CEL-1222556	ROS, RNS production in response to bacteria	IEA	Caenorhabditis elegans	3	0	0	0
Q21434	R-CEL-1222556	http://www.reactome.org/PathwayBrowser/#/R-CEL-1222556	ROS, RNS production in response to bacteria	IEA	Caenorhabditis elegans	3	0	0	0
Q21898	R-CEL-1222556	http://www.reactome.org/PathwayBrowser/#/R-CEL-1222556	ROS, RNS production in response to bacteria	IEA	Caenorhabditis elegans	3	0	0	0
Q22494	R-CEL-1222556	http://www.reactome.org/PathwayBrowser/#/R-CEL-1222556	ROS, RNS production in response to bacteria	IEA	Caenorhabditis elegans	3	0	0	0
Q23680	R-CEL-1222556	http://www.reactome.org/PathwayBrowser/#/R-CEL-1222556	ROS, RNS production in response to bacteria	IEA	Caenorhabditis elegans	3	0	0	0
Q95X44	R-CEL-1222556	http://www.reactome.org/PathwayBrowser/#/R-CEL-1222556	ROS, RNS production in response to bacteria	IEA	Caenorhabditis elegans	3	0	0	0
Q95XG8	R-CEL-1222556	http://www.reactome.org/PathwayBrowser/#/R-CEL-1222556	ROS, RNS production in response to bacteria	IEA	Caenorhabditis elegans	3	0	0	0
Q95YD5	R-CEL-1222556	http://www.reactome.org/PathwayBrowser/#/R-CEL-1222556	ROS, RNS production in response to bacteria	IEA	Caenorhabditis elegans	3	0	0	0
Q9N5A0	R-CEL-1222556	http://www.reactome.org/PathwayBrowser/#/R-CEL-1222556	ROS, RNS production in response to bacteria	IEA	Caenorhabditis elegans	3	0	0	0
Q9XW92	R-CEL-1222556	http://www.reactome.org/PathwayBrowser/#/R-CEL-1222556	ROS, RNS production in response to bacteria	IEA	Caenorhabditis elegans	3	0	0	0
Q9XXU9	R-CEL-1222556	http://www.reactome.org/PathwayBrowser/#/R-CEL-1222556	ROS, RNS production in response to bacteria	IEA	Caenorhabditis elegans	3	0	0	0
G5EGD2	R-CEL-1234158	http://www.reactome.org/PathwayBrowser/#/R-CEL-1234158	Regulation of gene expression by Hypoxia-inducible Factor	IEA	Caenorhabditis elegans	2	0	0	0
O02219	R-CEL-1234158	http://www.reactome.org/PathwayBrowser/#/R-CEL-1234158	Regulation of gene expression by Hypoxia-inducible Factor	IEA	Caenorhabditis elegans	1	0	0	0
B1Q256	R-CEL-1234176	http://www.reactome.org/PathwayBrowser/#/R-CEL-1234176	Oxygen-dependent proline hydroxylation of Hypoxia-inducible Factor Alpha	IEA	Caenorhabditis elegans	4	0	0	0
E2IUB2	R-CEL-1234176	http://www.reactome.org/PathwayBrowser/#/R-CEL-1234176	Oxygen-dependent proline hydroxylation of Hypoxia-inducible Factor Alpha	IEA	Caenorhabditis elegans	1	0	0	0
G5EBV0	R-CEL-1234176	http://www.reactome.org/PathwayBrowser/#/R-CEL-1234176	Oxygen-dependent proline hydroxylation of Hypoxia-inducible Factor Alpha	IEA	Caenorhabditis elegans	1	0	0	0
G5ECR7	R-CEL-1234176	http://www.reactome.org/PathwayBrowser/#/R-CEL-1234176	Oxygen-dependent proline hydroxylation of Hypoxia-inducible Factor Alpha	IEA	Caenorhabditis elegans	4	0	0	0
G5ECV8	R-CEL-1234176	http://www.reactome.org/PathwayBrowser/#/R-CEL-1234176	Oxygen-dependent proline hydroxylation of Hypoxia-inducible Factor Alpha	IEA	Caenorhabditis elegans	1	0	0	0
G5EE79	R-CEL-1234176	http://www.reactome.org/PathwayBrowser/#/R-CEL-1234176	Oxygen-dependent proline hydroxylation of Hypoxia-inducible Factor Alpha	IEA	Caenorhabditis elegans	1	0	0	0
G5EEP8	R-CEL-1234176	http://www.reactome.org/PathwayBrowser/#/R-CEL-1234176	Oxygen-dependent proline hydroxylation of Hypoxia-inducible Factor Alpha	IEA	Caenorhabditis elegans	1	0	0	0
G5EGD2	R-CEL-1234176	http://www.reactome.org/PathwayBrowser/#/R-CEL-1234176	Oxygen-dependent proline hydroxylation of Hypoxia-inducible Factor Alpha	IEA	Caenorhabditis elegans	2	0	0	0
P35129	R-CEL-1234176	http://www.reactome.org/PathwayBrowser/#/R-CEL-1234176	Oxygen-dependent proline hydroxylation of Hypoxia-inducible Factor Alpha	IEA	Caenorhabditis elegans	2	0	0	0
P37165	R-CEL-1234176	http://www.reactome.org/PathwayBrowser/#/R-CEL-1234176	Oxygen-dependent proline hydroxylation of Hypoxia-inducible Factor Alpha	IEA	Caenorhabditis elegans	51	0	0	0
P49632	R-CEL-1234176	http://www.reactome.org/PathwayBrowser/#/R-CEL-1234176	Oxygen-dependent proline hydroxylation of Hypoxia-inducible Factor Alpha	IEA	Caenorhabditis elegans	48	0	0	0
Q09557	R-CEL-1234176	http://www.reactome.org/PathwayBrowser/#/R-CEL-1234176	Oxygen-dependent proline hydroxylation of Hypoxia-inducible Factor Alpha	IEA	Caenorhabditis elegans	51	0	0	0
Q17390	R-CEL-1234176	http://www.reactome.org/PathwayBrowser/#/R-CEL-1234176	Oxygen-dependent proline hydroxylation of Hypoxia-inducible Factor Alpha	IEA	Caenorhabditis elegans	1	0	0	0
Q23153	R-CEL-1234176	http://www.reactome.org/PathwayBrowser/#/R-CEL-1234176	Oxygen-dependent proline hydroxylation of Hypoxia-inducible Factor Alpha	IEA	Caenorhabditis elegans	4	0	0	0
Q23457	R-CEL-1234176	http://www.reactome.org/PathwayBrowser/#/R-CEL-1234176	Oxygen-dependent proline hydroxylation of Hypoxia-inducible Factor Alpha	IEA	Caenorhabditis elegans	11	0	0	0
Q56W01	R-CEL-1234176	http://www.reactome.org/PathwayBrowser/#/R-CEL-1234176	Oxygen-dependent proline hydroxylation of Hypoxia-inducible Factor Alpha	IEA	Caenorhabditis elegans	1	0	0	0
Q9BKS1	R-CEL-1234176	http://www.reactome.org/PathwayBrowser/#/R-CEL-1234176	Oxygen-dependent proline hydroxylation of Hypoxia-inducible Factor Alpha	IEA	Caenorhabditis elegans	4	0	0	0
Q9XUT3	R-CEL-1234176	http://www.reactome.org/PathwayBrowser/#/R-CEL-1234176	Oxygen-dependent proline hydroxylation of Hypoxia-inducible Factor Alpha	IEA	Caenorhabditis elegans	51	0	0	0
P34446	R-CEL-1236973	http://www.reactome.org/PathwayBrowser/#/R-CEL-1236973	Cross-presentation of particulate exogenous antigens (phagosomes)	IEA	Caenorhabditis elegans	10	0	0	0
Q11124	R-CEL-1236973	http://www.reactome.org/PathwayBrowser/#/R-CEL-1236973	Cross-presentation of particulate exogenous antigens (phagosomes)	IEA	Caenorhabditis elegans	2	0	0	0
Q27874	R-CEL-1236973	http://www.reactome.org/PathwayBrowser/#/R-CEL-1236973	Cross-presentation of particulate exogenous antigens (phagosomes)	IEA	Caenorhabditis elegans	13	0	0	0
C0Z1Y9	R-CEL-1236978	http://www.reactome.org/PathwayBrowser/#/R-CEL-1236978	Cross-presentation of soluble exogenous antigens (endosomes)	IEA	Caenorhabditis elegans	12	0	0	0
K7ZUR1	R-CEL-1236978	http://www.reactome.org/PathwayBrowser/#/R-CEL-1236978	Cross-presentation of soluble exogenous antigens (endosomes)	IEA	Caenorhabditis elegans	12	0	0	0
N1NTN5	R-CEL-1236978	http://www.reactome.org/PathwayBrowser/#/R-CEL-1236978	Cross-presentation of soluble exogenous antigens (endosomes)	IEA	Caenorhabditis elegans	12	0	0	0
O16368	R-CEL-1236978	http://www.reactome.org/PathwayBrowser/#/R-CEL-1236978	Cross-presentation of soluble exogenous antigens (endosomes)	IEA	Caenorhabditis elegans	12	0	0	0
O17071	R-CEL-1236978	http://www.reactome.org/PathwayBrowser/#/R-CEL-1236978	Cross-presentation of soluble exogenous antigens (endosomes)	IEA	Caenorhabditis elegans	12	0	0	0
O17586	R-CEL-1236978	http://www.reactome.org/PathwayBrowser/#/R-CEL-1236978	Cross-presentation of soluble exogenous antigens (endosomes)	IEA	Caenorhabditis elegans	12	0	0	0
O44156	R-CEL-1236978	http://www.reactome.org/PathwayBrowser/#/R-CEL-1236978	Cross-presentation of soluble exogenous antigens (endosomes)	IEA	Caenorhabditis elegans	12	0	0	0
O61742	R-CEL-1236978	http://www.reactome.org/PathwayBrowser/#/R-CEL-1236978	Cross-presentation of soluble exogenous antigens (endosomes)	IEA	Caenorhabditis elegans	12	0	0	0
O61792	R-CEL-1236978	http://www.reactome.org/PathwayBrowser/#/R-CEL-1236978	Cross-presentation of soluble exogenous antigens (endosomes)	IEA	Caenorhabditis elegans	12	0	0	0
O62102	R-CEL-1236978	http://www.reactome.org/PathwayBrowser/#/R-CEL-1236978	Cross-presentation of soluble exogenous antigens (endosomes)	IEA	Caenorhabditis elegans	12	0	0	0
O76371	R-CEL-1236978	http://www.reactome.org/PathwayBrowser/#/R-CEL-1236978	Cross-presentation of soluble exogenous antigens (endosomes)	IEA	Caenorhabditis elegans	12	0	0	0
O76577	R-CEL-1236978	http://www.reactome.org/PathwayBrowser/#/R-CEL-1236978	Cross-presentation of soluble exogenous antigens (endosomes)	IEA	Caenorhabditis elegans	12	0	0	0
P34286	R-CEL-1236978	http://www.reactome.org/PathwayBrowser/#/R-CEL-1236978	Cross-presentation of soluble exogenous antigens (endosomes)	IEA	Caenorhabditis elegans	12	0	0	0
P34481	R-CEL-1236978	http://www.reactome.org/PathwayBrowser/#/R-CEL-1236978	Cross-presentation of soluble exogenous antigens (endosomes)	IEA	Caenorhabditis elegans	12	0	0	0
P41883	R-CEL-1236978	http://www.reactome.org/PathwayBrowser/#/R-CEL-1236978	Cross-presentation of soluble exogenous antigens (endosomes)	IEA	Caenorhabditis elegans	12	0	0	0
P46502	R-CEL-1236978	http://www.reactome.org/PathwayBrowser/#/R-CEL-1236978	Cross-presentation of soluble exogenous antigens (endosomes)	IEA	Caenorhabditis elegans	12	0	0	0
P90868	R-CEL-1236978	http://www.reactome.org/PathwayBrowser/#/R-CEL-1236978	Cross-presentation of soluble exogenous antigens (endosomes)	IEA	Caenorhabditis elegans	12	0	0	0
P91025	R-CEL-1236978	http://www.reactome.org/PathwayBrowser/#/R-CEL-1236978	Cross-presentation of soluble exogenous antigens (endosomes)	IEA	Caenorhabditis elegans	12	0	0	0
P91477	R-CEL-1236978	http://www.reactome.org/PathwayBrowser/#/R-CEL-1236978	Cross-presentation of soluble exogenous antigens (endosomes)	IEA	Caenorhabditis elegans	12	0	0	0
P91834	R-CEL-1236978	http://www.reactome.org/PathwayBrowser/#/R-CEL-1236978	Cross-presentation of soluble exogenous antigens (endosomes)	IEA	Caenorhabditis elegans	12	0	0	0
Q04908	R-CEL-1236978	http://www.reactome.org/PathwayBrowser/#/R-CEL-1236978	Cross-presentation of soluble exogenous antigens (endosomes)	IEA	Caenorhabditis elegans	12	0	0	0
Q09583	R-CEL-1236978	http://www.reactome.org/PathwayBrowser/#/R-CEL-1236978	Cross-presentation of soluble exogenous antigens (endosomes)	IEA	Caenorhabditis elegans	12	0	0	0
Q10920	R-CEL-1236978	http://www.reactome.org/PathwayBrowser/#/R-CEL-1236978	Cross-presentation of soluble exogenous antigens (endosomes)	IEA	Caenorhabditis elegans	12	0	0	0
Q17971	R-CEL-1236978	http://www.reactome.org/PathwayBrowser/#/R-CEL-1236978	Cross-presentation of soluble exogenous antigens (endosomes)	IEA	Caenorhabditis elegans	12	0	0	0
Q18115	R-CEL-1236978	http://www.reactome.org/PathwayBrowser/#/R-CEL-1236978	Cross-presentation of soluble exogenous antigens (endosomes)	IEA	Caenorhabditis elegans	12	0	0	0
Q18787	R-CEL-1236978	http://www.reactome.org/PathwayBrowser/#/R-CEL-1236978	Cross-presentation of soluble exogenous antigens (endosomes)	IEA	Caenorhabditis elegans	12	0	0	0
Q19324	R-CEL-1236978	http://www.reactome.org/PathwayBrowser/#/R-CEL-1236978	Cross-presentation of soluble exogenous antigens (endosomes)	IEA	Caenorhabditis elegans	12	0	0	0
Q1ZXS9	R-CEL-1236978	http://www.reactome.org/PathwayBrowser/#/R-CEL-1236978	Cross-presentation of soluble exogenous antigens (endosomes)	IEA	Caenorhabditis elegans	12	0	0	0
Q20585	R-CEL-1236978	http://www.reactome.org/PathwayBrowser/#/R-CEL-1236978	Cross-presentation of soluble exogenous antigens (endosomes)	IEA	Caenorhabditis elegans	12	0	0	0
Q20938	R-CEL-1236978	http://www.reactome.org/PathwayBrowser/#/R-CEL-1236978	Cross-presentation of soluble exogenous antigens (endosomes)	IEA	Caenorhabditis elegans	12	0	0	0
Q22253	R-CEL-1236978	http://www.reactome.org/PathwayBrowser/#/R-CEL-1236978	Cross-presentation of soluble exogenous antigens (endosomes)	IEA	Caenorhabditis elegans	12	0	0	0
Q23237	R-CEL-1236978	http://www.reactome.org/PathwayBrowser/#/R-CEL-1236978	Cross-presentation of soluble exogenous antigens (endosomes)	IEA	Caenorhabditis elegans	12	0	0	0
Q23449	R-CEL-1236978	http://www.reactome.org/PathwayBrowser/#/R-CEL-1236978	Cross-presentation of soluble exogenous antigens (endosomes)	IEA	Caenorhabditis elegans	12	0	0	0
Q27488	R-CEL-1236978	http://www.reactome.org/PathwayBrowser/#/R-CEL-1236978	Cross-presentation of soluble exogenous antigens (endosomes)	IEA	Caenorhabditis elegans	12	0	0	0
Q8MXF1	R-CEL-1236978	http://www.reactome.org/PathwayBrowser/#/R-CEL-1236978	Cross-presentation of soluble exogenous antigens (endosomes)	IEA	Caenorhabditis elegans	12	0	0	0
Q95005	R-CEL-1236978	http://www.reactome.org/PathwayBrowser/#/R-CEL-1236978	Cross-presentation of soluble exogenous antigens (endosomes)	IEA	Caenorhabditis elegans	12	0	0	0
Q95008	R-CEL-1236978	http://www.reactome.org/PathwayBrowser/#/R-CEL-1236978	Cross-presentation of soluble exogenous antigens (endosomes)	IEA	Caenorhabditis elegans	12	0	0	0
Q95PZ7	R-CEL-1236978	http://www.reactome.org/PathwayBrowser/#/R-CEL-1236978	Cross-presentation of soluble exogenous antigens (endosomes)	IEA	Caenorhabditis elegans	12	0	0	0
Q966I8	R-CEL-1236978	http://www.reactome.org/PathwayBrowser/#/R-CEL-1236978	Cross-presentation of soluble exogenous antigens (endosomes)	IEA	Caenorhabditis elegans	12	0	0	0
Q9GZH5	R-CEL-1236978	http://www.reactome.org/PathwayBrowser/#/R-CEL-1236978	Cross-presentation of soluble exogenous antigens (endosomes)	IEA	Caenorhabditis elegans	12	0	0	0
Q9N599	R-CEL-1236978	http://www.reactome.org/PathwayBrowser/#/R-CEL-1236978	Cross-presentation of soluble exogenous antigens (endosomes)	IEA	Caenorhabditis elegans	12	0	0	0
Q9TZ65	R-CEL-1236978	http://www.reactome.org/PathwayBrowser/#/R-CEL-1236978	Cross-presentation of soluble exogenous antigens (endosomes)	IEA	Caenorhabditis elegans	12	0	0	0
Q9XTT9	R-CEL-1236978	http://www.reactome.org/PathwayBrowser/#/R-CEL-1236978	Cross-presentation of soluble exogenous antigens (endosomes)	IEA	Caenorhabditis elegans	12	0	0	0
Q9XUV0	R-CEL-1236978	http://www.reactome.org/PathwayBrowser/#/R-CEL-1236978	Cross-presentation of soluble exogenous antigens (endosomes)	IEA	Caenorhabditis elegans	12	0	0	0
O16521	R-CEL-1237044	http://www.reactome.org/PathwayBrowser/#/R-CEL-1237044	Erythrocytes take up carbon dioxide and release oxygen	IEA	Caenorhabditis elegans	3	0	0	0
O16522	R-CEL-1237044	http://www.reactome.org/PathwayBrowser/#/R-CEL-1237044	Erythrocytes take up carbon dioxide and release oxygen	IEA	Caenorhabditis elegans	3	0	0	0
Q10462	R-CEL-1237044	http://www.reactome.org/PathwayBrowser/#/R-CEL-1237044	Erythrocytes take up carbon dioxide and release oxygen	IEA	Caenorhabditis elegans	3	0	0	0
Q17463	R-CEL-1237044	http://www.reactome.org/PathwayBrowser/#/R-CEL-1237044	Erythrocytes take up carbon dioxide and release oxygen	IEA	Caenorhabditis elegans	3	0	0	0
Q22947	R-CEL-1237044	http://www.reactome.org/PathwayBrowser/#/R-CEL-1237044	Erythrocytes take up carbon dioxide and release oxygen	IEA	Caenorhabditis elegans	3	0	0	0
Q27504	R-CEL-1237044	http://www.reactome.org/PathwayBrowser/#/R-CEL-1237044	Erythrocytes take up carbon dioxide and release oxygen	IEA	Caenorhabditis elegans	3	1	0	0
Q7Z1J7	R-CEL-1237044	http://www.reactome.org/PathwayBrowser/#/R-CEL-1237044	Erythrocytes take up carbon dioxide and release oxygen	IEA	Caenorhabditis elegans	1	0	0	0
Q9N2M4	R-CEL-1237044	http://www.reactome.org/PathwayBrowser/#/R-CEL-1237044	Erythrocytes take up carbon dioxide and release oxygen	IEA	Caenorhabditis elegans	3	0	0	0
Q9N2M5	R-CEL-1237044	http://www.reactome.org/PathwayBrowser/#/R-CEL-1237044	Erythrocytes take up carbon dioxide and release oxygen	IEA	Caenorhabditis elegans	3	0	0	0
Q9XWF1	R-CEL-1237044	http://www.reactome.org/PathwayBrowser/#/R-CEL-1237044	Erythrocytes take up carbon dioxide and release oxygen	IEA	Caenorhabditis elegans	1	0	0	0
P91416	R-CEL-1237112	http://www.reactome.org/PathwayBrowser/#/R-CEL-1237112	Methionine salvage pathway	IEA	Caenorhabditis elegans	2	0	0	0
P91416	R-CEL-1237112	http://www.reactome.org/PathwayBrowser/#/R-CEL-1237112	Methionine salvage pathway	IEA	Caenorhabditis elegans	2	0	0	0
Q09407	R-CEL-1237112	http://www.reactome.org/PathwayBrowser/#/R-CEL-1237112	Methionine salvage pathway	IEA	Caenorhabditis elegans	2	0	0	0
Q09407	R-CEL-1237112	http://www.reactome.org/PathwayBrowser/#/R-CEL-1237112	Methionine salvage pathway	IEA	Caenorhabditis elegans	2	0	0	0
Q09438	R-CEL-1237112	http://www.reactome.org/PathwayBrowser/#/R-CEL-1237112	Methionine salvage pathway	IEA	Caenorhabditis elegans	2	0	0	0
Q09438	R-CEL-1237112	http://www.reactome.org/PathwayBrowser/#/R-CEL-1237112	Methionine salvage pathway	IEA	Caenorhabditis elegans	2	0	0	0
Q21012	R-CEL-1237112	http://www.reactome.org/PathwayBrowser/#/R-CEL-1237112	Methionine salvage pathway	IEA	Caenorhabditis elegans	2	0	0	0
Q21012	R-CEL-1237112	http://www.reactome.org/PathwayBrowser/#/R-CEL-1237112	Methionine salvage pathway	IEA	Caenorhabditis elegans	2	0	0	0
Q93169	R-CEL-1237112	http://www.reactome.org/PathwayBrowser/#/R-CEL-1237112	Methionine salvage pathway	IEA	Caenorhabditis elegans	2	0	0	0
Q93169	R-CEL-1237112	http://www.reactome.org/PathwayBrowser/#/R-CEL-1237112	Methionine salvage pathway	IEA	Caenorhabditis elegans	2	0	0	0
Q10462	R-CEL-1247673	http://www.reactome.org/PathwayBrowser/#/R-CEL-1247673	Erythrocytes take up oxygen and release carbon dioxide	IEA	Caenorhabditis elegans	3	0	0	0
Q17463	R-CEL-1247673	http://www.reactome.org/PathwayBrowser/#/R-CEL-1247673	Erythrocytes take up oxygen and release carbon dioxide	IEA	Caenorhabditis elegans	3	0	0	0
Q22947	R-CEL-1247673	http://www.reactome.org/PathwayBrowser/#/R-CEL-1247673	Erythrocytes take up oxygen and release carbon dioxide	IEA	Caenorhabditis elegans	3	0	0	0
Q27504	R-CEL-1247673	http://www.reactome.org/PathwayBrowser/#/R-CEL-1247673	Erythrocytes take up oxygen and release carbon dioxide	IEA	Caenorhabditis elegans	3	1	0	0
Q9N2M4	R-CEL-1247673	http://www.reactome.org/PathwayBrowser/#/R-CEL-1247673	Erythrocytes take up oxygen and release carbon dioxide	IEA	Caenorhabditis elegans	3	0	0	0
Q9N2M5	R-CEL-1247673	http://www.reactome.org/PathwayBrowser/#/R-CEL-1247673	Erythrocytes take up oxygen and release carbon dioxide	IEA	Caenorhabditis elegans	3	0	0	0
Q17941	R-CEL-1257604	http://www.reactome.org/PathwayBrowser/#/R-CEL-1257604	PIP3 activates AKT signaling	IEA	Caenorhabditis elegans	18	0	0	0
Q9XTG7	R-CEL-1257604	http://www.reactome.org/PathwayBrowser/#/R-CEL-1257604	PIP3 activates AKT signaling	IEA	Caenorhabditis elegans	18	0	0	0
Q9Y1J3	R-CEL-1257604	http://www.reactome.org/PathwayBrowser/#/R-CEL-1257604	PIP3 activates AKT signaling	IEA	Caenorhabditis elegans	15	0	0	0
B3VBI8	R-CEL-1296041	http://www.reactome.org/PathwayBrowser/#/R-CEL-1296041	Activation of G protein gated Potassium channels	IEA	Caenorhabditis elegans	5	0	0	0
B7CED7	R-CEL-1296041	http://www.reactome.org/PathwayBrowser/#/R-CEL-1296041	Activation of G protein gated Potassium channels	IEA	Caenorhabditis elegans	5	0	0	0
D3YT08	R-CEL-1296041	http://www.reactome.org/PathwayBrowser/#/R-CEL-1296041	Activation of G protein gated Potassium channels	IEA	Caenorhabditis elegans	5	0	0	0
G5ECB2	R-CEL-1296041	http://www.reactome.org/PathwayBrowser/#/R-CEL-1296041	Activation of G protein gated Potassium channels	IEA	Caenorhabditis elegans	5	0	0	0
H2KYE6	R-CEL-1296041	http://www.reactome.org/PathwayBrowser/#/R-CEL-1296041	Activation of G protein gated Potassium channels	IEA	Caenorhabditis elegans	5	0	0	0
H2L0Q3	R-CEL-1296041	http://www.reactome.org/PathwayBrowser/#/R-CEL-1296041	Activation of G protein gated Potassium channels	IEA	Caenorhabditis elegans	5	0	0	0
P17343	R-CEL-1296041	http://www.reactome.org/PathwayBrowser/#/R-CEL-1296041	Activation of G protein gated Potassium channels	IEA	Caenorhabditis elegans	6	0	0	0
P52192	R-CEL-1296041	http://www.reactome.org/PathwayBrowser/#/R-CEL-1296041	Activation of G protein gated Potassium channels	IEA	Caenorhabditis elegans	5	0	0	0
Q9N502	R-CEL-1296041	http://www.reactome.org/PathwayBrowser/#/R-CEL-1296041	Activation of G protein gated Potassium channels	IEA	Caenorhabditis elegans	5	0	0	0
U4PN13	R-CEL-1296041	http://www.reactome.org/PathwayBrowser/#/R-CEL-1296041	Activation of G protein gated Potassium channels	IEA	Caenorhabditis elegans	5	0	0	0
U4PSB4	R-CEL-1296041	http://www.reactome.org/PathwayBrowser/#/R-CEL-1296041	Activation of G protein gated Potassium channels	IEA	Caenorhabditis elegans	5	0	0	0
D5MCU0	R-CEL-1296052	http://www.reactome.org/PathwayBrowser/#/R-CEL-1296052	Ca2+ activated K+ channels	IEA	Caenorhabditis elegans	1	0	0	0
G5EBM2	R-CEL-1296052	http://www.reactome.org/PathwayBrowser/#/R-CEL-1296052	Ca2+ activated K+ channels	IEA	Caenorhabditis elegans	1	0	0	0
G5ECI3	R-CEL-1296052	http://www.reactome.org/PathwayBrowser/#/R-CEL-1296052	Ca2+ activated K+ channels	IEA	Caenorhabditis elegans	1	0	0	0
G5ECM0	R-CEL-1296052	http://www.reactome.org/PathwayBrowser/#/R-CEL-1296052	Ca2+ activated K+ channels	IEA	Caenorhabditis elegans	1	0	0	0
G5ED53	R-CEL-1296052	http://www.reactome.org/PathwayBrowser/#/R-CEL-1296052	Ca2+ activated K+ channels	IEA	Caenorhabditis elegans	1	0	0	0
G5EDA9	R-CEL-1296052	http://www.reactome.org/PathwayBrowser/#/R-CEL-1296052	Ca2+ activated K+ channels	IEA	Caenorhabditis elegans	1	0	0	0
G5EDG3	R-CEL-1296052	http://www.reactome.org/PathwayBrowser/#/R-CEL-1296052	Ca2+ activated K+ channels	IEA	Caenorhabditis elegans	1	0	0	0
G5EER9	R-CEL-1296052	http://www.reactome.org/PathwayBrowser/#/R-CEL-1296052	Ca2+ activated K+ channels	IEA	Caenorhabditis elegans	1	0	0	0
G5EEU0	R-CEL-1296052	http://www.reactome.org/PathwayBrowser/#/R-CEL-1296052	Ca2+ activated K+ channels	IEA	Caenorhabditis elegans	1	0	0	0
G5EEZ9	R-CEL-1296052	http://www.reactome.org/PathwayBrowser/#/R-CEL-1296052	Ca2+ activated K+ channels	IEA	Caenorhabditis elegans	1	0	0	0
G5EFI1	R-CEL-1296052	http://www.reactome.org/PathwayBrowser/#/R-CEL-1296052	Ca2+ activated K+ channels	IEA	Caenorhabditis elegans	1	0	0	0
G5EGU5	R-CEL-1296052	http://www.reactome.org/PathwayBrowser/#/R-CEL-1296052	Ca2+ activated K+ channels	IEA	Caenorhabditis elegans	1	0	0	0
K7STE9	R-CEL-1296052	http://www.reactome.org/PathwayBrowser/#/R-CEL-1296052	Ca2+ activated K+ channels	IEA	Caenorhabditis elegans	1	0	0	0
O17697	R-CEL-1296052	http://www.reactome.org/PathwayBrowser/#/R-CEL-1296052	Ca2+ activated K+ channels	IEA	Caenorhabditis elegans	1	1	0	0
Q11122	R-CEL-1296052	http://www.reactome.org/PathwayBrowser/#/R-CEL-1296052	Ca2+ activated K+ channels	IEA	Caenorhabditis elegans	1	0	0	0
Q8I4D2	R-CEL-1296052	http://www.reactome.org/PathwayBrowser/#/R-CEL-1296052	Ca2+ activated K+ channels	IEA	Caenorhabditis elegans	1	0	0	0
Q8I4G4	R-CEL-1296052	http://www.reactome.org/PathwayBrowser/#/R-CEL-1296052	Ca2+ activated K+ channels	IEA	Caenorhabditis elegans	1	0	0	0
Q8I4G5	R-CEL-1296052	http://www.reactome.org/PathwayBrowser/#/R-CEL-1296052	Ca2+ activated K+ channels	IEA	Caenorhabditis elegans	1	0	0	0
V6CLJ1	R-CEL-1296052	http://www.reactome.org/PathwayBrowser/#/R-CEL-1296052	Ca2+ activated K+ channels	IEA	Caenorhabditis elegans	1	0	0	0
V6CLK4	R-CEL-1296052	http://www.reactome.org/PathwayBrowser/#/R-CEL-1296052	Ca2+ activated K+ channels	IEA	Caenorhabditis elegans	1	0	0	0
D3YT08	R-CEL-1296053	http://www.reactome.org/PathwayBrowser/#/R-CEL-1296053	Classical Kir channels	IEA	Caenorhabditis elegans	5	0	0	0
H2KYE6	R-CEL-1296053	http://www.reactome.org/PathwayBrowser/#/R-CEL-1296053	Classical Kir channels	IEA	Caenorhabditis elegans	5	0	0	0
P52192	R-CEL-1296053	http://www.reactome.org/PathwayBrowser/#/R-CEL-1296053	Classical Kir channels	IEA	Caenorhabditis elegans	5	0	0	0
U4PN13	R-CEL-1296053	http://www.reactome.org/PathwayBrowser/#/R-CEL-1296053	Classical Kir channels	IEA	Caenorhabditis elegans	5	0	0	0
U4PSB4	R-CEL-1296053	http://www.reactome.org/PathwayBrowser/#/R-CEL-1296053	Classical Kir channels	IEA	Caenorhabditis elegans	5	0	0	0
D3YT08	R-CEL-1296067	http://www.reactome.org/PathwayBrowser/#/R-CEL-1296067	Potassium transport channels	IEA	Caenorhabditis elegans	5	0	0	0
H2KYE6	R-CEL-1296067	http://www.reactome.org/PathwayBrowser/#/R-CEL-1296067	Potassium transport channels	IEA	Caenorhabditis elegans	5	0	0	0
P52192	R-CEL-1296067	http://www.reactome.org/PathwayBrowser/#/R-CEL-1296067	Potassium transport channels	IEA	Caenorhabditis elegans	5	0	0	0
U4PN13	R-CEL-1296067	http://www.reactome.org/PathwayBrowser/#/R-CEL-1296067	Potassium transport channels	IEA	Caenorhabditis elegans	5	0	0	0
U4PSB4	R-CEL-1296067	http://www.reactome.org/PathwayBrowser/#/R-CEL-1296067	Potassium transport channels	IEA	Caenorhabditis elegans	5	0	0	0
F5GUD1	R-CEL-1299287	http://www.reactome.org/PathwayBrowser/#/R-CEL-1299287	Tandem pore domain halothane-inhibited K+ channel (THIK)	IEA	Caenorhabditis elegans	1	0	0	0
I2HAG5	R-CEL-1299287	http://www.reactome.org/PathwayBrowser/#/R-CEL-1299287	Tandem pore domain halothane-inhibited K+ channel (THIK)	IEA	Caenorhabditis elegans	1	0	0	0
Q21094	R-CEL-1299287	http://www.reactome.org/PathwayBrowser/#/R-CEL-1299287	Tandem pore domain halothane-inhibited K+ channel (THIK)	IEA	Caenorhabditis elegans	1	0	0	0
B2FDA9	R-CEL-1299308	http://www.reactome.org/PathwayBrowser/#/R-CEL-1299308	Tandem of pore domain in a weak inwardly rectifying K+ channels (TWIK)	IEA	Caenorhabditis elegans	2	0	0	0
Q9NEV3	R-CEL-1299308	http://www.reactome.org/PathwayBrowser/#/R-CEL-1299308	Tandem of pore domain in a weak inwardly rectifying K+ channels (TWIK)	IEA	Caenorhabditis elegans	2	0	0	0
G5ECW6	R-CEL-1299316	http://www.reactome.org/PathwayBrowser/#/R-CEL-1299316	TWIK-releated acid-sensitive K+ channel (TASK)	IEA	Caenorhabditis elegans	2	0	0	0
O17185	R-CEL-1299316	http://www.reactome.org/PathwayBrowser/#/R-CEL-1299316	TWIK-releated acid-sensitive K+ channel (TASK)	IEA	Caenorhabditis elegans	2	0	0	0
A0A061AL62	R-CEL-1299344	http://www.reactome.org/PathwayBrowser/#/R-CEL-1299344	TWIK-related spinal cord K+ channel (TRESK)	IEA	Caenorhabditis elegans	1	0	0	0
A1EHR5	R-CEL-1299344	http://www.reactome.org/PathwayBrowser/#/R-CEL-1299344	TWIK-related spinal cord K+ channel (TRESK)	IEA	Caenorhabditis elegans	1	0	0	0
A6ZJ65	R-CEL-1299344	http://www.reactome.org/PathwayBrowser/#/R-CEL-1299344	TWIK-related spinal cord K+ channel (TRESK)	IEA	Caenorhabditis elegans	1	0	0	0
A6ZJ66	R-CEL-1299344	http://www.reactome.org/PathwayBrowser/#/R-CEL-1299344	TWIK-related spinal cord K+ channel (TRESK)	IEA	Caenorhabditis elegans	1	0	0	0
B0M0M8	R-CEL-1299344	http://www.reactome.org/PathwayBrowser/#/R-CEL-1299344	TWIK-related spinal cord K+ channel (TRESK)	IEA	Caenorhabditis elegans	1	0	0	0
C0Z3L1	R-CEL-1299344	http://www.reactome.org/PathwayBrowser/#/R-CEL-1299344	TWIK-related spinal cord K+ channel (TRESK)	IEA	Caenorhabditis elegans	1	0	0	0
G5EBQ2	R-CEL-1299344	http://www.reactome.org/PathwayBrowser/#/R-CEL-1299344	TWIK-related spinal cord K+ channel (TRESK)	IEA	Caenorhabditis elegans	1	0	0	0
G5ECU9	R-CEL-1299344	http://www.reactome.org/PathwayBrowser/#/R-CEL-1299344	TWIK-related spinal cord K+ channel (TRESK)	IEA	Caenorhabditis elegans	1	0	0	0
G5ED42	R-CEL-1299344	http://www.reactome.org/PathwayBrowser/#/R-CEL-1299344	TWIK-related spinal cord K+ channel (TRESK)	IEA	Caenorhabditis elegans	1	0	0	0
G5EEH1	R-CEL-1299344	http://www.reactome.org/PathwayBrowser/#/R-CEL-1299344	TWIK-related spinal cord K+ channel (TRESK)	IEA	Caenorhabditis elegans	1	0	0	0
G5EFI2	R-CEL-1299344	http://www.reactome.org/PathwayBrowser/#/R-CEL-1299344	TWIK-related spinal cord K+ channel (TRESK)	IEA	Caenorhabditis elegans	1	0	0	0
G5EG92	R-CEL-1299344	http://www.reactome.org/PathwayBrowser/#/R-CEL-1299344	TWIK-related spinal cord K+ channel (TRESK)	IEA	Caenorhabditis elegans	1	1	0	0
G5EGD4	R-CEL-1299344	http://www.reactome.org/PathwayBrowser/#/R-CEL-1299344	TWIK-related spinal cord K+ channel (TRESK)	IEA	Caenorhabditis elegans	1	0	0	0
H2KZ65	R-CEL-1299344	http://www.reactome.org/PathwayBrowser/#/R-CEL-1299344	TWIK-related spinal cord K+ channel (TRESK)	IEA	Caenorhabditis elegans	1	0	0	0
H2KZ66	R-CEL-1299344	http://www.reactome.org/PathwayBrowser/#/R-CEL-1299344	TWIK-related spinal cord K+ channel (TRESK)	IEA	Caenorhabditis elegans	1	0	0	0
H2KZB5	R-CEL-1299344	http://www.reactome.org/PathwayBrowser/#/R-CEL-1299344	TWIK-related spinal cord K+ channel (TRESK)	IEA	Caenorhabditis elegans	1	0	0	0
H2L2J8	R-CEL-1299344	http://www.reactome.org/PathwayBrowser/#/R-CEL-1299344	TWIK-related spinal cord K+ channel (TRESK)	IEA	Caenorhabditis elegans	1	0	0	0
H2L2J9	R-CEL-1299344	http://www.reactome.org/PathwayBrowser/#/R-CEL-1299344	TWIK-related spinal cord K+ channel (TRESK)	IEA	Caenorhabditis elegans	1	0	0	0
I2HAD1	R-CEL-1299344	http://www.reactome.org/PathwayBrowser/#/R-CEL-1299344	TWIK-related spinal cord K+ channel (TRESK)	IEA	Caenorhabditis elegans	1	0	0	0
I2HAD2	R-CEL-1299344	http://www.reactome.org/PathwayBrowser/#/R-CEL-1299344	TWIK-related spinal cord K+ channel (TRESK)	IEA	Caenorhabditis elegans	1	0	0	0
I2HAD3	R-CEL-1299344	http://www.reactome.org/PathwayBrowser/#/R-CEL-1299344	TWIK-related spinal cord K+ channel (TRESK)	IEA	Caenorhabditis elegans	1	0	0	0
I2HAI4	R-CEL-1299344	http://www.reactome.org/PathwayBrowser/#/R-CEL-1299344	TWIK-related spinal cord K+ channel (TRESK)	IEA	Caenorhabditis elegans	1	0	0	0
I3VM46	R-CEL-1299344	http://www.reactome.org/PathwayBrowser/#/R-CEL-1299344	TWIK-related spinal cord K+ channel (TRESK)	IEA	Caenorhabditis elegans	1	0	0	0
K8ERV0	R-CEL-1299344	http://www.reactome.org/PathwayBrowser/#/R-CEL-1299344	TWIK-related spinal cord K+ channel (TRESK)	IEA	Caenorhabditis elegans	1	0	0	0
K8ESB6	R-CEL-1299344	http://www.reactome.org/PathwayBrowser/#/R-CEL-1299344	TWIK-related spinal cord K+ channel (TRESK)	IEA	Caenorhabditis elegans	1	0	0	0
K8ESK0	R-CEL-1299344	http://www.reactome.org/PathwayBrowser/#/R-CEL-1299344	TWIK-related spinal cord K+ channel (TRESK)	IEA	Caenorhabditis elegans	1	0	0	0
K8F7Q8	R-CEL-1299344	http://www.reactome.org/PathwayBrowser/#/R-CEL-1299344	TWIK-related spinal cord K+ channel (TRESK)	IEA	Caenorhabditis elegans	1	0	0	0
K8FDZ5	R-CEL-1299344	http://www.reactome.org/PathwayBrowser/#/R-CEL-1299344	TWIK-related spinal cord K+ channel (TRESK)	IEA	Caenorhabditis elegans	1	0	0	0
O45422	R-CEL-1299344	http://www.reactome.org/PathwayBrowser/#/R-CEL-1299344	TWIK-related spinal cord K+ channel (TRESK)	IEA	Caenorhabditis elegans	1	0	0	0
O45891	R-CEL-1299344	http://www.reactome.org/PathwayBrowser/#/R-CEL-1299344	TWIK-related spinal cord K+ channel (TRESK)	IEA	Caenorhabditis elegans	1	1	0	0
O45894	R-CEL-1299344	http://www.reactome.org/PathwayBrowser/#/R-CEL-1299344	TWIK-related spinal cord K+ channel (TRESK)	IEA	Caenorhabditis elegans	1	0	0	0
O76788	R-CEL-1299344	http://www.reactome.org/PathwayBrowser/#/R-CEL-1299344	TWIK-related spinal cord K+ channel (TRESK)	IEA	Caenorhabditis elegans	1	0	0	0
O76791	R-CEL-1299344	http://www.reactome.org/PathwayBrowser/#/R-CEL-1299344	TWIK-related spinal cord K+ channel (TRESK)	IEA	Caenorhabditis elegans	1	0	0	0
O76792	R-CEL-1299344	http://www.reactome.org/PathwayBrowser/#/R-CEL-1299344	TWIK-related spinal cord K+ channel (TRESK)	IEA	Caenorhabditis elegans	1	0	0	0
O76793	R-CEL-1299344	http://www.reactome.org/PathwayBrowser/#/R-CEL-1299344	TWIK-related spinal cord K+ channel (TRESK)	IEA	Caenorhabditis elegans	1	0	0	0
O76794	R-CEL-1299344	http://www.reactome.org/PathwayBrowser/#/R-CEL-1299344	TWIK-related spinal cord K+ channel (TRESK)	IEA	Caenorhabditis elegans	1	0	0	0
P34410	R-CEL-1299344	http://www.reactome.org/PathwayBrowser/#/R-CEL-1299344	TWIK-related spinal cord K+ channel (TRESK)	IEA	Caenorhabditis elegans	1	0	0	0
P90863	R-CEL-1299344	http://www.reactome.org/PathwayBrowser/#/R-CEL-1299344	TWIK-related spinal cord K+ channel (TRESK)	IEA	Caenorhabditis elegans	1	0	0	0
Q18120	R-CEL-1299344	http://www.reactome.org/PathwayBrowser/#/R-CEL-1299344	TWIK-related spinal cord K+ channel (TRESK)	IEA	Caenorhabditis elegans	1	0	0	0
Q21467	R-CEL-1299344	http://www.reactome.org/PathwayBrowser/#/R-CEL-1299344	TWIK-related spinal cord K+ channel (TRESK)	IEA	Caenorhabditis elegans	1	0	0	0
Q21529	R-CEL-1299344	http://www.reactome.org/PathwayBrowser/#/R-CEL-1299344	TWIK-related spinal cord K+ channel (TRESK)	IEA	Caenorhabditis elegans	1	0	0	0
Q21729	R-CEL-1299344	http://www.reactome.org/PathwayBrowser/#/R-CEL-1299344	TWIK-related spinal cord K+ channel (TRESK)	IEA	Caenorhabditis elegans	1	0	0	0
Q22042	R-CEL-1299344	http://www.reactome.org/PathwayBrowser/#/R-CEL-1299344	TWIK-related spinal cord K+ channel (TRESK)	IEA	Caenorhabditis elegans	1	1	0	0
Q22043	R-CEL-1299344	http://www.reactome.org/PathwayBrowser/#/R-CEL-1299344	TWIK-related spinal cord K+ channel (TRESK)	IEA	Caenorhabditis elegans	1	0	0	0
Q22271	R-CEL-1299344	http://www.reactome.org/PathwayBrowser/#/R-CEL-1299344	TWIK-related spinal cord K+ channel (TRESK)	IEA	Caenorhabditis elegans	1	0	0	0
Q22426	R-CEL-1299344	http://www.reactome.org/PathwayBrowser/#/R-CEL-1299344	TWIK-related spinal cord K+ channel (TRESK)	IEA	Caenorhabditis elegans	1	0	0	0
Q22940	R-CEL-1299344	http://www.reactome.org/PathwayBrowser/#/R-CEL-1299344	TWIK-related spinal cord K+ channel (TRESK)	IEA	Caenorhabditis elegans	1	0	0	0
Q23297	R-CEL-1299344	http://www.reactome.org/PathwayBrowser/#/R-CEL-1299344	TWIK-related spinal cord K+ channel (TRESK)	IEA	Caenorhabditis elegans	1	0	0	0
Q23386	R-CEL-1299344	http://www.reactome.org/PathwayBrowser/#/R-CEL-1299344	TWIK-related spinal cord K+ channel (TRESK)	IEA	Caenorhabditis elegans	1	0	0	0
Q23435	R-CEL-1299344	http://www.reactome.org/PathwayBrowser/#/R-CEL-1299344	TWIK-related spinal cord K+ channel (TRESK)	IEA	Caenorhabditis elegans	1	0	0	0
Q304E2	R-CEL-1299344	http://www.reactome.org/PathwayBrowser/#/R-CEL-1299344	TWIK-related spinal cord K+ channel (TRESK)	IEA	Caenorhabditis elegans	1	0	0	0
Q3V5J5	R-CEL-1299344	http://www.reactome.org/PathwayBrowser/#/R-CEL-1299344	TWIK-related spinal cord K+ channel (TRESK)	IEA	Caenorhabditis elegans	1	0	0	0
Q564V7	R-CEL-1299344	http://www.reactome.org/PathwayBrowser/#/R-CEL-1299344	TWIK-related spinal cord K+ channel (TRESK)	IEA	Caenorhabditis elegans	1	0	0	0
Q56VS1	R-CEL-1299344	http://www.reactome.org/PathwayBrowser/#/R-CEL-1299344	TWIK-related spinal cord K+ channel (TRESK)	IEA	Caenorhabditis elegans	1	0	0	0
Q6BES3	R-CEL-1299344	http://www.reactome.org/PathwayBrowser/#/R-CEL-1299344	TWIK-related spinal cord K+ channel (TRESK)	IEA	Caenorhabditis elegans	1	0	0	0
Q6EUT8	R-CEL-1299344	http://www.reactome.org/PathwayBrowser/#/R-CEL-1299344	TWIK-related spinal cord K+ channel (TRESK)	IEA	Caenorhabditis elegans	1	0	0	0
Q7JM20	R-CEL-1299344	http://www.reactome.org/PathwayBrowser/#/R-CEL-1299344	TWIK-related spinal cord K+ channel (TRESK)	IEA	Caenorhabditis elegans	1	0	0	0
Q7KPB1	R-CEL-1299344	http://www.reactome.org/PathwayBrowser/#/R-CEL-1299344	TWIK-related spinal cord K+ channel (TRESK)	IEA	Caenorhabditis elegans	1	0	0	0
Q7YWY7	R-CEL-1299344	http://www.reactome.org/PathwayBrowser/#/R-CEL-1299344	TWIK-related spinal cord K+ channel (TRESK)	IEA	Caenorhabditis elegans	1	0	0	0
Q8IG65	R-CEL-1299344	http://www.reactome.org/PathwayBrowser/#/R-CEL-1299344	TWIK-related spinal cord K+ channel (TRESK)	IEA	Caenorhabditis elegans	1	0	0	0
Q93732	R-CEL-1299344	http://www.reactome.org/PathwayBrowser/#/R-CEL-1299344	TWIK-related spinal cord K+ channel (TRESK)	IEA	Caenorhabditis elegans	1	0	0	0
Q93764	R-CEL-1299344	http://www.reactome.org/PathwayBrowser/#/R-CEL-1299344	TWIK-related spinal cord K+ channel (TRESK)	IEA	Caenorhabditis elegans	1	0	0	0
Q94253	R-CEL-1299344	http://www.reactome.org/PathwayBrowser/#/R-CEL-1299344	TWIK-related spinal cord K+ channel (TRESK)	IEA	Caenorhabditis elegans	1	0	0	0
Q9BL31	R-CEL-1299344	http://www.reactome.org/PathwayBrowser/#/R-CEL-1299344	TWIK-related spinal cord K+ channel (TRESK)	IEA	Caenorhabditis elegans	1	0	0	0
Q9XTV6	R-CEL-1299344	http://www.reactome.org/PathwayBrowser/#/R-CEL-1299344	TWIK-related spinal cord K+ channel (TRESK)	IEA	Caenorhabditis elegans	1	0	0	0
Q9XU07	R-CEL-1299344	http://www.reactome.org/PathwayBrowser/#/R-CEL-1299344	TWIK-related spinal cord K+ channel (TRESK)	IEA	Caenorhabditis elegans	1	0	0	0
Q9XVD1	R-CEL-1299344	http://www.reactome.org/PathwayBrowser/#/R-CEL-1299344	TWIK-related spinal cord K+ channel (TRESK)	IEA	Caenorhabditis elegans	1	0	0	0
Q9XX01	R-CEL-1299344	http://www.reactome.org/PathwayBrowser/#/R-CEL-1299344	TWIK-related spinal cord K+ channel (TRESK)	IEA	Caenorhabditis elegans	1	0	0	0
Q9XXF6	R-CEL-1299344	http://www.reactome.org/PathwayBrowser/#/R-CEL-1299344	TWIK-related spinal cord K+ channel (TRESK)	IEA	Caenorhabditis elegans	1	0	0	0
Q95V25	R-CEL-1300642	http://www.reactome.org/PathwayBrowser/#/R-CEL-1300642	Sperm Motility And Taxes	IEA	Caenorhabditis elegans	1	0	0	0
O45948	R-CEL-1362409	http://www.reactome.org/PathwayBrowser/#/R-CEL-1362409	Mitochondrial iron-sulfur cluster biogenesis	IEA	Caenorhabditis elegans	1	0	0	0
O61741	R-CEL-1362409	http://www.reactome.org/PathwayBrowser/#/R-CEL-1362409	Mitochondrial iron-sulfur cluster biogenesis	IEA	Caenorhabditis elegans	2	0	0	0
Q9NA32	R-CEL-1362409	http://www.reactome.org/PathwayBrowser/#/R-CEL-1362409	Mitochondrial iron-sulfur cluster biogenesis	IEA	Caenorhabditis elegans	2	0	0	0
Q9TY03	R-CEL-1362409	http://www.reactome.org/PathwayBrowser/#/R-CEL-1362409	Mitochondrial iron-sulfur cluster biogenesis	IEA	Caenorhabditis elegans	1	0	0	0
A0A061ACG9	R-CEL-1369007	http://www.reactome.org/PathwayBrowser/#/R-CEL-1369007	Mitochondrial ABC transporters	IEA	Caenorhabditis elegans	1	0	0	0
A0A061AJH7	R-CEL-1369007	http://www.reactome.org/PathwayBrowser/#/R-CEL-1369007	Mitochondrial ABC transporters	IEA	Caenorhabditis elegans	1	0	0	0
G4SRS5	R-CEL-1369007	http://www.reactome.org/PathwayBrowser/#/R-CEL-1369007	Mitochondrial ABC transporters	IEA	Caenorhabditis elegans	1	0	0	0
G5EFD4	R-CEL-1369007	http://www.reactome.org/PathwayBrowser/#/R-CEL-1369007	Mitochondrial ABC transporters	IEA	Caenorhabditis elegans	1	0	0	0
Q71JP7	R-CEL-1369007	http://www.reactome.org/PathwayBrowser/#/R-CEL-1369007	Mitochondrial ABC transporters	IEA	Caenorhabditis elegans	1	0	0	0
Q71JP8	R-CEL-1369007	http://www.reactome.org/PathwayBrowser/#/R-CEL-1369007	Mitochondrial ABC transporters	IEA	Caenorhabditis elegans	1	0	0	0
Q71JP9	R-CEL-1369007	http://www.reactome.org/PathwayBrowser/#/R-CEL-1369007	Mitochondrial ABC transporters	IEA	Caenorhabditis elegans	1	0	0	0
A0A9R9	R-CEL-1369062	http://www.reactome.org/PathwayBrowser/#/R-CEL-1369062	ABC transporters in lipid homeostasis	IEA	Caenorhabditis elegans	2	0	0	0
D7SFK1	R-CEL-1369062	http://www.reactome.org/PathwayBrowser/#/R-CEL-1369062	ABC transporters in lipid homeostasis	IEA	Caenorhabditis elegans	2	0	0	0
H2L028	R-CEL-1369062	http://www.reactome.org/PathwayBrowser/#/R-CEL-1369062	ABC transporters in lipid homeostasis	IEA	Caenorhabditis elegans	2	0	0	0
O16574	R-CEL-1369062	http://www.reactome.org/PathwayBrowser/#/R-CEL-1369062	ABC transporters in lipid homeostasis	IEA	Caenorhabditis elegans	2	0	0	0
O45730	R-CEL-1369062	http://www.reactome.org/PathwayBrowser/#/R-CEL-1369062	ABC transporters in lipid homeostasis	IEA	Caenorhabditis elegans	4	1	0	0
P34358	R-CEL-1369062	http://www.reactome.org/PathwayBrowser/#/R-CEL-1369062	ABC transporters in lipid homeostasis	IEA	Caenorhabditis elegans	2	0	0	0
P34453	R-CEL-1369062	http://www.reactome.org/PathwayBrowser/#/R-CEL-1369062	ABC transporters in lipid homeostasis	IEA	Caenorhabditis elegans	1	0	0	0
P90746	R-CEL-1369062	http://www.reactome.org/PathwayBrowser/#/R-CEL-1369062	ABC transporters in lipid homeostasis	IEA	Caenorhabditis elegans	2	0	0	0
Q09466	R-CEL-1369062	http://www.reactome.org/PathwayBrowser/#/R-CEL-1369062	ABC transporters in lipid homeostasis	IEA	Caenorhabditis elegans	2	0	0	0
Q11180	R-CEL-1369062	http://www.reactome.org/PathwayBrowser/#/R-CEL-1369062	ABC transporters in lipid homeostasis	IEA	Caenorhabditis elegans	2	0	0	0
Q18027	R-CEL-1369062	http://www.reactome.org/PathwayBrowser/#/R-CEL-1369062	ABC transporters in lipid homeostasis	IEA	Caenorhabditis elegans	1	0	0	0
Q18028	R-CEL-1369062	http://www.reactome.org/PathwayBrowser/#/R-CEL-1369062	ABC transporters in lipid homeostasis	IEA	Caenorhabditis elegans	1	0	0	0
Q18597	R-CEL-1369062	http://www.reactome.org/PathwayBrowser/#/R-CEL-1369062	ABC transporters in lipid homeostasis	IEA	Caenorhabditis elegans	1	1	0	0
Q18598	R-CEL-1369062	http://www.reactome.org/PathwayBrowser/#/R-CEL-1369062	ABC transporters in lipid homeostasis	IEA	Caenorhabditis elegans	1	1	0	0
Q18900	R-CEL-1369062	http://www.reactome.org/PathwayBrowser/#/R-CEL-1369062	ABC transporters in lipid homeostasis	IEA	Caenorhabditis elegans	2	0	0	0
Q19585	R-CEL-1369062	http://www.reactome.org/PathwayBrowser/#/R-CEL-1369062	ABC transporters in lipid homeostasis	IEA	Caenorhabditis elegans	2	0	0	0
Q1RS86	R-CEL-1369062	http://www.reactome.org/PathwayBrowser/#/R-CEL-1369062	ABC transporters in lipid homeostasis	IEA	Caenorhabditis elegans	4	0	0	0
Q22802	R-CEL-1369062	http://www.reactome.org/PathwayBrowser/#/R-CEL-1369062	ABC transporters in lipid homeostasis	IEA	Caenorhabditis elegans	2	0	0	0
Q9TXV8	R-CEL-1369062	http://www.reactome.org/PathwayBrowser/#/R-CEL-1369062	ABC transporters in lipid homeostasis	IEA	Caenorhabditis elegans	2	0	0	0
Q9U2D0	R-CEL-1369062	http://www.reactome.org/PathwayBrowser/#/R-CEL-1369062	ABC transporters in lipid homeostasis	IEA	Caenorhabditis elegans	2	0	0	0
Q9XW49	R-CEL-1369062	http://www.reactome.org/PathwayBrowser/#/R-CEL-1369062	ABC transporters in lipid homeostasis	IEA	Caenorhabditis elegans	2	0	0	0
X5LXB2	R-CEL-1369062	http://www.reactome.org/PathwayBrowser/#/R-CEL-1369062	ABC transporters in lipid homeostasis	IEA	Caenorhabditis elegans	4	0	0	0
P34586	R-CEL-139853	http://www.reactome.org/PathwayBrowser/#/R-CEL-139853	Elevation of cytosolic Ca2+ levels	IEA	Caenorhabditis elegans	3	0	0	0
Q9Y0A1	R-CEL-139853	http://www.reactome.org/PathwayBrowser/#/R-CEL-139853	Elevation of cytosolic Ca2+ levels	IEA	Caenorhabditis elegans	5	0	0	0
A9Z1L1	R-CEL-140837	http://www.reactome.org/PathwayBrowser/#/R-CEL-140837	Intrinsic Pathway of Fibrin Clot Formation	IEA	Caenorhabditis elegans	5	0	0	0
G5EBT3	R-CEL-140837	http://www.reactome.org/PathwayBrowser/#/R-CEL-140837	Intrinsic Pathway of Fibrin Clot Formation	IEA	Caenorhabditis elegans	5	0	0	0
G5ECY2	R-CEL-140837	http://www.reactome.org/PathwayBrowser/#/R-CEL-140837	Intrinsic Pathway of Fibrin Clot Formation	IEA	Caenorhabditis elegans	5	0	0	0
G5EE40	R-CEL-140837	http://www.reactome.org/PathwayBrowser/#/R-CEL-140837	Intrinsic Pathway of Fibrin Clot Formation	IEA	Caenorhabditis elegans	5	0	0	0
G5EFH4	R-CEL-140837	http://www.reactome.org/PathwayBrowser/#/R-CEL-140837	Intrinsic Pathway of Fibrin Clot Formation	IEA	Caenorhabditis elegans	5	0	0	0
O17365	R-CEL-140837	http://www.reactome.org/PathwayBrowser/#/R-CEL-140837	Intrinsic Pathway of Fibrin Clot Formation	IEA	Caenorhabditis elegans	5	0	0	0
Q17800	R-CEL-140837	http://www.reactome.org/PathwayBrowser/#/R-CEL-140837	Intrinsic Pathway of Fibrin Clot Formation	IEA	Caenorhabditis elegans	4	0	0	0
Q19651	R-CEL-140837	http://www.reactome.org/PathwayBrowser/#/R-CEL-140837	Intrinsic Pathway of Fibrin Clot Formation	IEA	Caenorhabditis elegans	5	0	0	0
Q6QUQ4	R-CEL-140837	http://www.reactome.org/PathwayBrowser/#/R-CEL-140837	Intrinsic Pathway of Fibrin Clot Formation	IEA	Caenorhabditis elegans	5	0	0	0
Q6QUQ5	R-CEL-140837	http://www.reactome.org/PathwayBrowser/#/R-CEL-140837	Intrinsic Pathway of Fibrin Clot Formation	IEA	Caenorhabditis elegans	5	0	0	0
Q6QUQ6	R-CEL-140837	http://www.reactome.org/PathwayBrowser/#/R-CEL-140837	Intrinsic Pathway of Fibrin Clot Formation	IEA	Caenorhabditis elegans	5	0	0	0
Q6QUR0	R-CEL-140837	http://www.reactome.org/PathwayBrowser/#/R-CEL-140837	Intrinsic Pathway of Fibrin Clot Formation	IEA	Caenorhabditis elegans	5	0	0	0
E0AHD3	R-CEL-141334	http://www.reactome.org/PathwayBrowser/#/R-CEL-141334	PAOs oxidise polyamines to amines	IEA	Caenorhabditis elegans	2	0	0	0
E0AHD4	R-CEL-141334	http://www.reactome.org/PathwayBrowser/#/R-CEL-141334	PAOs oxidise polyamines to amines	IEA	Caenorhabditis elegans	2	0	0	0
O76383	R-CEL-141334	http://www.reactome.org/PathwayBrowser/#/R-CEL-141334	PAOs oxidise polyamines to amines	IEA	Caenorhabditis elegans	2	0	0	0
Q09373	R-CEL-141405	http://www.reactome.org/PathwayBrowser/#/R-CEL-141405	Inhibition of the proteolytic activity of APC/C required for the onset of anaphase by mitotic spindle checkpoint components	IEA	Caenorhabditis elegans	5	0	0	0
Q09373	R-CEL-141405	http://www.reactome.org/PathwayBrowser/#/R-CEL-141405	Inhibition of the proteolytic activity of APC/C required for the onset of anaphase by mitotic spindle checkpoint components	IEA	Caenorhabditis elegans	5	0	0	0
Q8T870	R-CEL-141405	http://www.reactome.org/PathwayBrowser/#/R-CEL-141405	Inhibition of the proteolytic activity of APC/C required for the onset of anaphase by mitotic spindle checkpoint components	IEA	Caenorhabditis elegans	4	0	0	0
Q8T870	R-CEL-141405	http://www.reactome.org/PathwayBrowser/#/R-CEL-141405	Inhibition of the proteolytic activity of APC/C required for the onset of anaphase by mitotic spindle checkpoint components	IEA	Caenorhabditis elegans	4	0	0	0
Q9NGT3	R-CEL-141405	http://www.reactome.org/PathwayBrowser/#/R-CEL-141405	Inhibition of the proteolytic activity of APC/C required for the onset of anaphase by mitotic spindle checkpoint components	IEA	Caenorhabditis elegans	4	0	0	0
Q9NGT3	R-CEL-141405	http://www.reactome.org/PathwayBrowser/#/R-CEL-141405	Inhibition of the proteolytic activity of APC/C required for the onset of anaphase by mitotic spindle checkpoint components	IEA	Caenorhabditis elegans	4	0	0	0
U4PC21	R-CEL-141405	http://www.reactome.org/PathwayBrowser/#/R-CEL-141405	Inhibition of the proteolytic activity of APC/C required for the onset of anaphase by mitotic spindle checkpoint components	IEA	Caenorhabditis elegans	4	0	0	0
U4PC21	R-CEL-141405	http://www.reactome.org/PathwayBrowser/#/R-CEL-141405	Inhibition of the proteolytic activity of APC/C required for the onset of anaphase by mitotic spindle checkpoint components	IEA	Caenorhabditis elegans	4	0	0	0
Q09373	R-CEL-141430	http://www.reactome.org/PathwayBrowser/#/R-CEL-141430	Inactivation of APC/C via direct inhibition of the APC/C complex	IEA	Caenorhabditis elegans	5	0	0	0
Q09373	R-CEL-141430	http://www.reactome.org/PathwayBrowser/#/R-CEL-141430	Inactivation of APC/C via direct inhibition of the APC/C complex	IEA	Caenorhabditis elegans	5	0	0	0
Q21776	R-CEL-141430	http://www.reactome.org/PathwayBrowser/#/R-CEL-141430	Inactivation of APC/C via direct inhibition of the APC/C complex	IEA	Caenorhabditis elegans	2	0	0	0
Q21776	R-CEL-141430	http://www.reactome.org/PathwayBrowser/#/R-CEL-141430	Inactivation of APC/C via direct inhibition of the APC/C complex	IEA	Caenorhabditis elegans	2	0	0	0
Q8T870	R-CEL-141430	http://www.reactome.org/PathwayBrowser/#/R-CEL-141430	Inactivation of APC/C via direct inhibition of the APC/C complex	IEA	Caenorhabditis elegans	4	0	0	0
Q8T870	R-CEL-141430	http://www.reactome.org/PathwayBrowser/#/R-CEL-141430	Inactivation of APC/C via direct inhibition of the APC/C complex	IEA	Caenorhabditis elegans	4	0	0	0
Q9NGT3	R-CEL-141430	http://www.reactome.org/PathwayBrowser/#/R-CEL-141430	Inactivation of APC/C via direct inhibition of the APC/C complex	IEA	Caenorhabditis elegans	4	0	0	0
Q9NGT3	R-CEL-141430	http://www.reactome.org/PathwayBrowser/#/R-CEL-141430	Inactivation of APC/C via direct inhibition of the APC/C complex	IEA	Caenorhabditis elegans	4	0	0	0
Q9XWH0	R-CEL-141430	http://www.reactome.org/PathwayBrowser/#/R-CEL-141430	Inactivation of APC/C via direct inhibition of the APC/C complex	IEA	Caenorhabditis elegans	2	0	0	0
Q9XWH0	R-CEL-141430	http://www.reactome.org/PathwayBrowser/#/R-CEL-141430	Inactivation of APC/C via direct inhibition of the APC/C complex	IEA	Caenorhabditis elegans	2	0	0	0
U4PC21	R-CEL-141430	http://www.reactome.org/PathwayBrowser/#/R-CEL-141430	Inactivation of APC/C via direct inhibition of the APC/C complex	IEA	Caenorhabditis elegans	4	0	0	0
U4PC21	R-CEL-141430	http://www.reactome.org/PathwayBrowser/#/R-CEL-141430	Inactivation of APC/C via direct inhibition of the APC/C complex	IEA	Caenorhabditis elegans	4	0	0	0
Q03206	R-CEL-1433557	http://www.reactome.org/PathwayBrowser/#/R-CEL-1433557	Signaling by SCF-KIT	IEA	Caenorhabditis elegans	21	0	0	0
Q45FX5	R-CEL-1433557	http://www.reactome.org/PathwayBrowser/#/R-CEL-1433557	Signaling by SCF-KIT	IEA	Caenorhabditis elegans	10	0	0	0
Q94124	R-CEL-1433557	http://www.reactome.org/PathwayBrowser/#/R-CEL-1433557	Signaling by SCF-KIT	IEA	Caenorhabditis elegans	21	0	0	0
G5EDQ4	R-CEL-1442490	http://www.reactome.org/PathwayBrowser/#/R-CEL-1442490	Collagen degradation	IEA	Caenorhabditis elegans	3	0	0	0
G5EDV5	R-CEL-1442490	http://www.reactome.org/PathwayBrowser/#/R-CEL-1442490	Collagen degradation	IEA	Caenorhabditis elegans	3	0	0	0
G5EF89	R-CEL-1442490	http://www.reactome.org/PathwayBrowser/#/R-CEL-1442490	Collagen degradation	IEA	Caenorhabditis elegans	3	0	0	0
G5EFQ9	R-CEL-1442490	http://www.reactome.org/PathwayBrowser/#/R-CEL-1442490	Collagen degradation	IEA	Caenorhabditis elegans	2	0	0	0
G5EGA4	R-CEL-1442490	http://www.reactome.org/PathwayBrowser/#/R-CEL-1442490	Collagen degradation	IEA	Caenorhabditis elegans	3	0	0	0
H9G333	R-CEL-1442490	http://www.reactome.org/PathwayBrowser/#/R-CEL-1442490	Collagen degradation	IEA	Caenorhabditis elegans	4	0	0	0
O16288	R-CEL-1442490	http://www.reactome.org/PathwayBrowser/#/R-CEL-1442490	Collagen degradation	IEA	Caenorhabditis elegans	2	0	0	0
O16289	R-CEL-1442490	http://www.reactome.org/PathwayBrowser/#/R-CEL-1442490	Collagen degradation	IEA	Caenorhabditis elegans	2	1	0	0
O45466	R-CEL-1442490	http://www.reactome.org/PathwayBrowser/#/R-CEL-1442490	Collagen degradation	IEA	Caenorhabditis elegans	2	0	0	0
O45734	R-CEL-1442490	http://www.reactome.org/PathwayBrowser/#/R-CEL-1442490	Collagen degradation	IEA	Caenorhabditis elegans	4	0	0	0
O76368	R-CEL-1442490	http://www.reactome.org/PathwayBrowser/#/R-CEL-1442490	Collagen degradation	IEA	Caenorhabditis elegans	2	0	0	0
P25807	R-CEL-1442490	http://www.reactome.org/PathwayBrowser/#/R-CEL-1442490	Collagen degradation	IEA	Caenorhabditis elegans	2	1	0	0
P43507	R-CEL-1442490	http://www.reactome.org/PathwayBrowser/#/R-CEL-1442490	Collagen degradation	IEA	Caenorhabditis elegans	2	1	0	0
P43508	R-CEL-1442490	http://www.reactome.org/PathwayBrowser/#/R-CEL-1442490	Collagen degradation	IEA	Caenorhabditis elegans	2	1	0	0
P43509	R-CEL-1442490	http://www.reactome.org/PathwayBrowser/#/R-CEL-1442490	Collagen degradation	IEA	Caenorhabditis elegans	2	0	0	0
P43510	R-CEL-1442490	http://www.reactome.org/PathwayBrowser/#/R-CEL-1442490	Collagen degradation	IEA	Caenorhabditis elegans	2	0	0	0
P55956	R-CEL-1442490	http://www.reactome.org/PathwayBrowser/#/R-CEL-1442490	Collagen degradation	IEA	Caenorhabditis elegans	2	0	0	0
P91408	R-CEL-1442490	http://www.reactome.org/PathwayBrowser/#/R-CEL-1442490	Collagen degradation	IEA	Caenorhabditis elegans	3	0	0	0
P91991	R-CEL-1442490	http://www.reactome.org/PathwayBrowser/#/R-CEL-1442490	Collagen degradation	IEA	Caenorhabditis elegans	2	1	0	0
Q20950	R-CEL-1442490	http://www.reactome.org/PathwayBrowser/#/R-CEL-1442490	Collagen degradation	IEA	Caenorhabditis elegans	2	1	0	0
Q21966	R-CEL-1442490	http://www.reactome.org/PathwayBrowser/#/R-CEL-1442490	Collagen degradation	IEA	Caenorhabditis elegans	2	0	0	0
Q9BL59	R-CEL-1442490	http://www.reactome.org/PathwayBrowser/#/R-CEL-1442490	Collagen degradation	IEA	Caenorhabditis elegans	2	0	0	0
Q9U9K7	R-CEL-1442490	http://www.reactome.org/PathwayBrowser/#/R-CEL-1442490	Collagen degradation	IEA	Caenorhabditis elegans	3	0	0	0
V6CLS8	R-CEL-1442490	http://www.reactome.org/PathwayBrowser/#/R-CEL-1442490	Collagen degradation	IEA	Caenorhabditis elegans	2	0	0	0
V6CLX0	R-CEL-1442490	http://www.reactome.org/PathwayBrowser/#/R-CEL-1442490	Collagen degradation	IEA	Caenorhabditis elegans	2	0	0	0
G5EFC1	R-CEL-1445148	http://www.reactome.org/PathwayBrowser/#/R-CEL-1445148	Translocation of GLUT4 to the plasma membrane	IEA	Caenorhabditis elegans	2	0	0	0
H2L0Q6	R-CEL-1445148	http://www.reactome.org/PathwayBrowser/#/R-CEL-1445148	Translocation of GLUT4 to the plasma membrane	IEA	Caenorhabditis elegans	1	0	0	0
I7F493	R-CEL-1445148	http://www.reactome.org/PathwayBrowser/#/R-CEL-1445148	Translocation of GLUT4 to the plasma membrane	IEA	Caenorhabditis elegans	2	0	0	0
I7FW40	R-CEL-1445148	http://www.reactome.org/PathwayBrowser/#/R-CEL-1445148	Translocation of GLUT4 to the plasma membrane	IEA	Caenorhabditis elegans	1	0	0	0
I7FXD6	R-CEL-1445148	http://www.reactome.org/PathwayBrowser/#/R-CEL-1445148	Translocation of GLUT4 to the plasma membrane	IEA	Caenorhabditis elegans	1	0	0	0
P92149	R-CEL-1445148	http://www.reactome.org/PathwayBrowser/#/R-CEL-1445148	Translocation of GLUT4 to the plasma membrane	IEA	Caenorhabditis elegans	1	0	0	0
Q7JNM1	R-CEL-1445148	http://www.reactome.org/PathwayBrowser/#/R-CEL-1445148	Translocation of GLUT4 to the plasma membrane	IEA	Caenorhabditis elegans	1	0	0	0
Q93874	R-CEL-1445148	http://www.reactome.org/PathwayBrowser/#/R-CEL-1445148	Translocation of GLUT4 to the plasma membrane	IEA	Caenorhabditis elegans	1	0	0	0
Q94147	R-CEL-1445148	http://www.reactome.org/PathwayBrowser/#/R-CEL-1445148	Translocation of GLUT4 to the plasma membrane	IEA	Caenorhabditis elegans	2	0	0	0
Q94148	R-CEL-1445148	http://www.reactome.org/PathwayBrowser/#/R-CEL-1445148	Translocation of GLUT4 to the plasma membrane	IEA	Caenorhabditis elegans	1	0	0	0
Q9N3F8	R-CEL-1445148	http://www.reactome.org/PathwayBrowser/#/R-CEL-1445148	Translocation of GLUT4 to the plasma membrane	IEA	Caenorhabditis elegans	1	0	0	0
D6RYD9	R-CEL-1474151	http://www.reactome.org/PathwayBrowser/#/R-CEL-1474151	Tetrahydrobiopterin (BH4) synthesis, recycling, salvage and regulation	IEA	Caenorhabditis elegans	1	0	0	0
O02058	R-CEL-1474151	http://www.reactome.org/PathwayBrowser/#/R-CEL-1474151	Tetrahydrobiopterin (BH4) synthesis, recycling, salvage and regulation	IEA	Caenorhabditis elegans	1	0	0	0
O16305	R-CEL-1474151	http://www.reactome.org/PathwayBrowser/#/R-CEL-1474151	Tetrahydrobiopterin (BH4) synthesis, recycling, salvage and regulation	IEA	Caenorhabditis elegans	22	0	0	0
Q17941	R-CEL-1474151	http://www.reactome.org/PathwayBrowser/#/R-CEL-1474151	Tetrahydrobiopterin (BH4) synthesis, recycling, salvage and regulation	IEA	Caenorhabditis elegans	18	0	0	0
Q18688	R-CEL-1474151	http://www.reactome.org/PathwayBrowser/#/R-CEL-1474151	Tetrahydrobiopterin (BH4) synthesis, recycling, salvage and regulation	IEA	Caenorhabditis elegans	6	0	0	0
Q19980	R-CEL-1474151	http://www.reactome.org/PathwayBrowser/#/R-CEL-1474151	Tetrahydrobiopterin (BH4) synthesis, recycling, salvage and regulation	IEA	Caenorhabditis elegans	1	1	0	0
Q95XF6	R-CEL-1474151	http://www.reactome.org/PathwayBrowser/#/R-CEL-1474151	Tetrahydrobiopterin (BH4) synthesis, recycling, salvage and regulation	IEA	Caenorhabditis elegans	22	0	0	0
Q9XTG7	R-CEL-1474151	http://www.reactome.org/PathwayBrowser/#/R-CEL-1474151	Tetrahydrobiopterin (BH4) synthesis, recycling, salvage and regulation	IEA	Caenorhabditis elegans	18	0	0	0
G5EDW5	R-CEL-1474228	http://www.reactome.org/PathwayBrowser/#/R-CEL-1474228	Degradation of the extracellular matrix	IEA	Caenorhabditis elegans	1	0	0	0
H9G333	R-CEL-1474228	http://www.reactome.org/PathwayBrowser/#/R-CEL-1474228	Degradation of the extracellular matrix	IEA	Caenorhabditis elegans	4	0	0	0
O45734	R-CEL-1474228	http://www.reactome.org/PathwayBrowser/#/R-CEL-1474228	Degradation of the extracellular matrix	IEA	Caenorhabditis elegans	4	0	0	0
Q06561	R-CEL-1474228	http://www.reactome.org/PathwayBrowser/#/R-CEL-1474228	Degradation of the extracellular matrix	IEA	Caenorhabditis elegans	7	0	0	0
Q17800	R-CEL-1474228	http://www.reactome.org/PathwayBrowser/#/R-CEL-1474228	Degradation of the extracellular matrix	IEA	Caenorhabditis elegans	4	0	0	0
Q19791	R-CEL-1474228	http://www.reactome.org/PathwayBrowser/#/R-CEL-1474228	Degradation of the extracellular matrix	IEA	Caenorhabditis elegans	2	0	0	0
Q20176	R-CEL-1474228	http://www.reactome.org/PathwayBrowser/#/R-CEL-1474228	Degradation of the extracellular matrix	IEA	Caenorhabditis elegans	1	0	0	0
Q21146	R-CEL-1474228	http://www.reactome.org/PathwayBrowser/#/R-CEL-1474228	Degradation of the extracellular matrix	IEA	Caenorhabditis elegans	6	0	0	0
Q22574	R-CEL-1474228	http://www.reactome.org/PathwayBrowser/#/R-CEL-1474228	Degradation of the extracellular matrix	IEA	Caenorhabditis elegans	7	1	0	0
Q5ZR75	R-CEL-1474228	http://www.reactome.org/PathwayBrowser/#/R-CEL-1474228	Degradation of the extracellular matrix	IEA	Caenorhabditis elegans	12	0	0	0
Q10462	R-CEL-1475029	http://www.reactome.org/PathwayBrowser/#/R-CEL-1475029	Reversible hydration of carbon dioxide	IEA	Caenorhabditis elegans	3	0	0	0
Q27504	R-CEL-1475029	http://www.reactome.org/PathwayBrowser/#/R-CEL-1475029	Reversible hydration of carbon dioxide	IEA	Caenorhabditis elegans	3	1	0	0
A5JYU3	R-CEL-1482788	http://www.reactome.org/PathwayBrowser/#/R-CEL-1482788	Acyl chain remodelling of PC	IEA	Caenorhabditis elegans	2	0	0	0
F3Y5P2	R-CEL-1482788	http://www.reactome.org/PathwayBrowser/#/R-CEL-1482788	Acyl chain remodelling of PC	IEA	Caenorhabditis elegans	4	0	0	0
G5EBV1	R-CEL-1482788	http://www.reactome.org/PathwayBrowser/#/R-CEL-1482788	Acyl chain remodelling of PC	IEA	Caenorhabditis elegans	4	0	0	0
G5EC53	R-CEL-1482788	http://www.reactome.org/PathwayBrowser/#/R-CEL-1482788	Acyl chain remodelling of PC	IEA	Caenorhabditis elegans	3	0	0	0
G5EC56	R-CEL-1482788	http://www.reactome.org/PathwayBrowser/#/R-CEL-1482788	Acyl chain remodelling of PC	IEA	Caenorhabditis elegans	4	0	0	0
G5EEY2	R-CEL-1482788	http://www.reactome.org/PathwayBrowser/#/R-CEL-1482788	Acyl chain remodelling of PC	IEA	Caenorhabditis elegans	3	0	0	0
G5EF58	R-CEL-1482788	http://www.reactome.org/PathwayBrowser/#/R-CEL-1482788	Acyl chain remodelling of PC	IEA	Caenorhabditis elegans	4	0	0	0
G5EGD6	R-CEL-1482788	http://www.reactome.org/PathwayBrowser/#/R-CEL-1482788	Acyl chain remodelling of PC	IEA	Caenorhabditis elegans	4	0	0	0
H9G2W5	R-CEL-1482788	http://www.reactome.org/PathwayBrowser/#/R-CEL-1482788	Acyl chain remodelling of PC	IEA	Caenorhabditis elegans	3	0	0	0
H9G2W6	R-CEL-1482788	http://www.reactome.org/PathwayBrowser/#/R-CEL-1482788	Acyl chain remodelling of PC	IEA	Caenorhabditis elegans	3	0	0	0
O01300	R-CEL-1482788	http://www.reactome.org/PathwayBrowser/#/R-CEL-1482788	Acyl chain remodelling of PC	IEA	Caenorhabditis elegans	2	0	0	0
O01925	R-CEL-1482788	http://www.reactome.org/PathwayBrowser/#/R-CEL-1482788	Acyl chain remodelling of PC	IEA	Caenorhabditis elegans	3	0	0	0
O62146	R-CEL-1482788	http://www.reactome.org/PathwayBrowser/#/R-CEL-1482788	Acyl chain remodelling of PC	IEA	Caenorhabditis elegans	4	0	0	0
P90862	R-CEL-1482788	http://www.reactome.org/PathwayBrowser/#/R-CEL-1482788	Acyl chain remodelling of PC	IEA	Caenorhabditis elegans	2	0	0	0
Q17790	R-CEL-1482788	http://www.reactome.org/PathwayBrowser/#/R-CEL-1482788	Acyl chain remodelling of PC	IEA	Caenorhabditis elegans	6	0	0	0
Q20500	R-CEL-1482788	http://www.reactome.org/PathwayBrowser/#/R-CEL-1482788	Acyl chain remodelling of PC	IEA	Caenorhabditis elegans	4	1	0	0
Q21798	R-CEL-1482788	http://www.reactome.org/PathwayBrowser/#/R-CEL-1482788	Acyl chain remodelling of PC	IEA	Caenorhabditis elegans	2	0	0	0
Q21799	R-CEL-1482788	http://www.reactome.org/PathwayBrowser/#/R-CEL-1482788	Acyl chain remodelling of PC	IEA	Caenorhabditis elegans	2	0	0	0
Q23119	R-CEL-1482788	http://www.reactome.org/PathwayBrowser/#/R-CEL-1482788	Acyl chain remodelling of PC	IEA	Caenorhabditis elegans	2	0	0	0
Q8I4J6	R-CEL-1482788	http://www.reactome.org/PathwayBrowser/#/R-CEL-1482788	Acyl chain remodelling of PC	IEA	Caenorhabditis elegans	2	0	0	0
Q8MXQ8	R-CEL-1482788	http://www.reactome.org/PathwayBrowser/#/R-CEL-1482788	Acyl chain remodelling of PC	IEA	Caenorhabditis elegans	2	0	0	0
Q8MXR3	R-CEL-1482788	http://www.reactome.org/PathwayBrowser/#/R-CEL-1482788	Acyl chain remodelling of PC	IEA	Caenorhabditis elegans	2	0	0	0
Q95QL1	R-CEL-1482788	http://www.reactome.org/PathwayBrowser/#/R-CEL-1482788	Acyl chain remodelling of PC	IEA	Caenorhabditis elegans	2	1	0	0
Q95YD2	R-CEL-1482788	http://www.reactome.org/PathwayBrowser/#/R-CEL-1482788	Acyl chain remodelling of PC	IEA	Caenorhabditis elegans	4	0	0	0
Q9BL07	R-CEL-1482788	http://www.reactome.org/PathwayBrowser/#/R-CEL-1482788	Acyl chain remodelling of PC	IEA	Caenorhabditis elegans	4	0	0	0
Q9N2Z4	R-CEL-1482788	http://www.reactome.org/PathwayBrowser/#/R-CEL-1482788	Acyl chain remodelling of PC	IEA	Caenorhabditis elegans	2	0	0	0
Q9N4P5	R-CEL-1482788	http://www.reactome.org/PathwayBrowser/#/R-CEL-1482788	Acyl chain remodelling of PC	IEA	Caenorhabditis elegans	2	0	0	0
Q9N5L3	R-CEL-1482788	http://www.reactome.org/PathwayBrowser/#/R-CEL-1482788	Acyl chain remodelling of PC	IEA	Caenorhabditis elegans	4	0	0	0
Q9TYS0	R-CEL-1482788	http://www.reactome.org/PathwayBrowser/#/R-CEL-1482788	Acyl chain remodelling of PC	IEA	Caenorhabditis elegans	4	0	0	0
Q9XUB0	R-CEL-1482788	http://www.reactome.org/PathwayBrowser/#/R-CEL-1482788	Acyl chain remodelling of PC	IEA	Caenorhabditis elegans	3	0	0	0
O16526	R-CEL-1482798	http://www.reactome.org/PathwayBrowser/#/R-CEL-1482798	Acyl chain remodeling of CL	IEA	Caenorhabditis elegans	3	0	0	0
O17612	R-CEL-1482798	http://www.reactome.org/PathwayBrowser/#/R-CEL-1482798	Acyl chain remodeling of CL	IEA	Caenorhabditis elegans	7	0	0	0
P34255	R-CEL-1482798	http://www.reactome.org/PathwayBrowser/#/R-CEL-1482798	Acyl chain remodeling of CL	IEA	Caenorhabditis elegans	7	0	0	0
Q20800	R-CEL-1482798	http://www.reactome.org/PathwayBrowser/#/R-CEL-1482798	Acyl chain remodeling of CL	IEA	Caenorhabditis elegans	3	0	0	0
Q23087	R-CEL-1482798	http://www.reactome.org/PathwayBrowser/#/R-CEL-1482798	Acyl chain remodeling of CL	IEA	Caenorhabditis elegans	3	0	0	0
Q23598	R-CEL-1482798	http://www.reactome.org/PathwayBrowser/#/R-CEL-1482798	Acyl chain remodeling of CL	IEA	Caenorhabditis elegans	1	0	0	0
Q8T8N8	R-CEL-1482798	http://www.reactome.org/PathwayBrowser/#/R-CEL-1482798	Acyl chain remodeling of CL	IEA	Caenorhabditis elegans	7	0	0	0
Q9BIC3	R-CEL-1482798	http://www.reactome.org/PathwayBrowser/#/R-CEL-1482798	Acyl chain remodeling of CL	IEA	Caenorhabditis elegans	7	0	0	0
Q9GYT0	R-CEL-1482798	http://www.reactome.org/PathwayBrowser/#/R-CEL-1482798	Acyl chain remodeling of CL	IEA	Caenorhabditis elegans	7	0	0	0
G5EC53	R-CEL-1482801	http://www.reactome.org/PathwayBrowser/#/R-CEL-1482801	Acyl chain remodelling of PS	IEA	Caenorhabditis elegans	3	0	0	0
G5EEY2	R-CEL-1482801	http://www.reactome.org/PathwayBrowser/#/R-CEL-1482801	Acyl chain remodelling of PS	IEA	Caenorhabditis elegans	3	0	0	0
H9G2W5	R-CEL-1482801	http://www.reactome.org/PathwayBrowser/#/R-CEL-1482801	Acyl chain remodelling of PS	IEA	Caenorhabditis elegans	3	0	0	0
H9G2W6	R-CEL-1482801	http://www.reactome.org/PathwayBrowser/#/R-CEL-1482801	Acyl chain remodelling of PS	IEA	Caenorhabditis elegans	3	0	0	0
O01925	R-CEL-1482801	http://www.reactome.org/PathwayBrowser/#/R-CEL-1482801	Acyl chain remodelling of PS	IEA	Caenorhabditis elegans	3	0	0	0
Q17790	R-CEL-1482801	http://www.reactome.org/PathwayBrowser/#/R-CEL-1482801	Acyl chain remodelling of PS	IEA	Caenorhabditis elegans	6	0	0	0
Q9XUB0	R-CEL-1482801	http://www.reactome.org/PathwayBrowser/#/R-CEL-1482801	Acyl chain remodelling of PS	IEA	Caenorhabditis elegans	3	0	0	0
F3Y5P2	R-CEL-1482839	http://www.reactome.org/PathwayBrowser/#/R-CEL-1482839	Acyl chain remodelling of PE	IEA	Caenorhabditis elegans	4	0	0	0
G5EBV1	R-CEL-1482839	http://www.reactome.org/PathwayBrowser/#/R-CEL-1482839	Acyl chain remodelling of PE	IEA	Caenorhabditis elegans	4	0	0	0
G5EC53	R-CEL-1482839	http://www.reactome.org/PathwayBrowser/#/R-CEL-1482839	Acyl chain remodelling of PE	IEA	Caenorhabditis elegans	3	0	0	0
G5EC56	R-CEL-1482839	http://www.reactome.org/PathwayBrowser/#/R-CEL-1482839	Acyl chain remodelling of PE	IEA	Caenorhabditis elegans	4	0	0	0
G5EEY2	R-CEL-1482839	http://www.reactome.org/PathwayBrowser/#/R-CEL-1482839	Acyl chain remodelling of PE	IEA	Caenorhabditis elegans	3	0	0	0
G5EF58	R-CEL-1482839	http://www.reactome.org/PathwayBrowser/#/R-CEL-1482839	Acyl chain remodelling of PE	IEA	Caenorhabditis elegans	4	0	0	0
G5EGD6	R-CEL-1482839	http://www.reactome.org/PathwayBrowser/#/R-CEL-1482839	Acyl chain remodelling of PE	IEA	Caenorhabditis elegans	4	0	0	0
H9G2W5	R-CEL-1482839	http://www.reactome.org/PathwayBrowser/#/R-CEL-1482839	Acyl chain remodelling of PE	IEA	Caenorhabditis elegans	3	0	0	0
H9G2W6	R-CEL-1482839	http://www.reactome.org/PathwayBrowser/#/R-CEL-1482839	Acyl chain remodelling of PE	IEA	Caenorhabditis elegans	3	0	0	0
O01925	R-CEL-1482839	http://www.reactome.org/PathwayBrowser/#/R-CEL-1482839	Acyl chain remodelling of PE	IEA	Caenorhabditis elegans	3	0	0	0
O62146	R-CEL-1482839	http://www.reactome.org/PathwayBrowser/#/R-CEL-1482839	Acyl chain remodelling of PE	IEA	Caenorhabditis elegans	4	0	0	0
Q17790	R-CEL-1482839	http://www.reactome.org/PathwayBrowser/#/R-CEL-1482839	Acyl chain remodelling of PE	IEA	Caenorhabditis elegans	6	0	0	0
Q20500	R-CEL-1482839	http://www.reactome.org/PathwayBrowser/#/R-CEL-1482839	Acyl chain remodelling of PE	IEA	Caenorhabditis elegans	4	1	0	0
Q8MXR3	R-CEL-1482839	http://www.reactome.org/PathwayBrowser/#/R-CEL-1482839	Acyl chain remodelling of PE	IEA	Caenorhabditis elegans	2	0	0	0
Q95YD2	R-CEL-1482839	http://www.reactome.org/PathwayBrowser/#/R-CEL-1482839	Acyl chain remodelling of PE	IEA	Caenorhabditis elegans	4	0	0	0
Q9BL07	R-CEL-1482839	http://www.reactome.org/PathwayBrowser/#/R-CEL-1482839	Acyl chain remodelling of PE	IEA	Caenorhabditis elegans	4	0	0	0
Q9N5L3	R-CEL-1482839	http://www.reactome.org/PathwayBrowser/#/R-CEL-1482839	Acyl chain remodelling of PE	IEA	Caenorhabditis elegans	4	0	0	0
Q9TYS0	R-CEL-1482839	http://www.reactome.org/PathwayBrowser/#/R-CEL-1482839	Acyl chain remodelling of PE	IEA	Caenorhabditis elegans	4	0	0	0
Q9XUB0	R-CEL-1482839	http://www.reactome.org/PathwayBrowser/#/R-CEL-1482839	Acyl chain remodelling of PE	IEA	Caenorhabditis elegans	3	0	0	0
F1LIN4	R-CEL-1482883	http://www.reactome.org/PathwayBrowser/#/R-CEL-1482883	Acyl chain remodeling of DAG and TAG	IEA	Caenorhabditis elegans	2	0	0	0
G5EBH6	R-CEL-1482883	http://www.reactome.org/PathwayBrowser/#/R-CEL-1482883	Acyl chain remodeling of DAG and TAG	IEA	Caenorhabditis elegans	2	0	0	0
O01881	R-CEL-1482883	http://www.reactome.org/PathwayBrowser/#/R-CEL-1482883	Acyl chain remodeling of DAG and TAG	IEA	Caenorhabditis elegans	5	0	0	0
Q11186	R-CEL-1482883	http://www.reactome.org/PathwayBrowser/#/R-CEL-1482883	Acyl chain remodeling of DAG and TAG	IEA	Caenorhabditis elegans	2	0	0	0
Q23067	R-CEL-1482883	http://www.reactome.org/PathwayBrowser/#/R-CEL-1482883	Acyl chain remodeling of DAG and TAG	IEA	Caenorhabditis elegans	5	0	0	0
Q86FS9	R-CEL-1482883	http://www.reactome.org/PathwayBrowser/#/R-CEL-1482883	Acyl chain remodeling of DAG and TAG	IEA	Caenorhabditis elegans	5	0	0	0
Q9N4S3	R-CEL-1482883	http://www.reactome.org/PathwayBrowser/#/R-CEL-1482883	Acyl chain remodeling of DAG and TAG	IEA	Caenorhabditis elegans	5	0	0	0
Q9NCE1	R-CEL-1482883	http://www.reactome.org/PathwayBrowser/#/R-CEL-1482883	Acyl chain remodeling of DAG and TAG	IEA	Caenorhabditis elegans	2	0	0	0
Q9XUW0	R-CEL-1482883	http://www.reactome.org/PathwayBrowser/#/R-CEL-1482883	Acyl chain remodeling of DAG and TAG	IEA	Caenorhabditis elegans	5	0	0	0
O62146	R-CEL-1482922	http://www.reactome.org/PathwayBrowser/#/R-CEL-1482922	Acyl chain remodelling of PI	IEA	Caenorhabditis elegans	4	0	0	0
Q17790	R-CEL-1482922	http://www.reactome.org/PathwayBrowser/#/R-CEL-1482922	Acyl chain remodelling of PI	IEA	Caenorhabditis elegans	6	0	0	0
Q19468	R-CEL-1482922	http://www.reactome.org/PathwayBrowser/#/R-CEL-1482922	Acyl chain remodelling of PI	IEA	Caenorhabditis elegans	1	0	0	0
Q9BL07	R-CEL-1482922	http://www.reactome.org/PathwayBrowser/#/R-CEL-1482922	Acyl chain remodelling of PI	IEA	Caenorhabditis elegans	4	0	0	0
A0A061ACQ5	R-CEL-1482925	http://www.reactome.org/PathwayBrowser/#/R-CEL-1482925	Acyl chain remodelling of PG	IEA	Caenorhabditis elegans	1	0	0	0
O01882	R-CEL-1482925	http://www.reactome.org/PathwayBrowser/#/R-CEL-1482925	Acyl chain remodelling of PG	IEA	Caenorhabditis elegans	1	0	0	0
O01916	R-CEL-1482925	http://www.reactome.org/PathwayBrowser/#/R-CEL-1482925	Acyl chain remodelling of PG	IEA	Caenorhabditis elegans	2	0	0	0
Q11087	R-CEL-1482925	http://www.reactome.org/PathwayBrowser/#/R-CEL-1482925	Acyl chain remodelling of PG	IEA	Caenorhabditis elegans	1	1	0	0
Q17790	R-CEL-1482925	http://www.reactome.org/PathwayBrowser/#/R-CEL-1482925	Acyl chain remodelling of PG	IEA	Caenorhabditis elegans	6	0	0	0
Q19221	R-CEL-1482925	http://www.reactome.org/PathwayBrowser/#/R-CEL-1482925	Acyl chain remodelling of PG	IEA	Caenorhabditis elegans	1	0	0	0
Q95R03	R-CEL-1482925	http://www.reactome.org/PathwayBrowser/#/R-CEL-1482925	Acyl chain remodelling of PG	IEA	Caenorhabditis elegans	1	0	0	0
O01916	R-CEL-1483076	http://www.reactome.org/PathwayBrowser/#/R-CEL-1483076	Synthesis of CL	IEA	Caenorhabditis elegans	2	0	0	0
O18143	R-CEL-1483101	http://www.reactome.org/PathwayBrowser/#/R-CEL-1483101	Synthesis of PS	IEA	Caenorhabditis elegans	1	0	0	0
Q09643	R-CEL-1483101	http://www.reactome.org/PathwayBrowser/#/R-CEL-1483101	Synthesis of PS	IEA	Caenorhabditis elegans	1	0	0	0
O62146	R-CEL-1483115	http://www.reactome.org/PathwayBrowser/#/R-CEL-1483115	Hydrolysis of LPC	IEA	Caenorhabditis elegans	4	0	0	0
Q9BL07	R-CEL-1483115	http://www.reactome.org/PathwayBrowser/#/R-CEL-1483115	Hydrolysis of LPC	IEA	Caenorhabditis elegans	4	0	0	0
P53439	R-CEL-1483148	http://www.reactome.org/PathwayBrowser/#/R-CEL-1483148	Synthesis of PG	IEA	Caenorhabditis elegans	2	0	0	0
H2KZ86	R-CEL-1483152	http://www.reactome.org/PathwayBrowser/#/R-CEL-1483152	Hydrolysis of LPE	IEA	Caenorhabditis elegans	1	0	0	0
O02218	R-CEL-1483152	http://www.reactome.org/PathwayBrowser/#/R-CEL-1483152	Hydrolysis of LPE	IEA	Caenorhabditis elegans	1	0	0	0
P91143	R-CEL-1483152	http://www.reactome.org/PathwayBrowser/#/R-CEL-1483152	Hydrolysis of LPE	IEA	Caenorhabditis elegans	1	0	0	0
Q8I7H5	R-CEL-1483152	http://www.reactome.org/PathwayBrowser/#/R-CEL-1483152	Hydrolysis of LPE	IEA	Caenorhabditis elegans	1	0	0	0
G5EDU3	R-CEL-1483166	http://www.reactome.org/PathwayBrowser/#/R-CEL-1483166	Synthesis of PA	IEA	Caenorhabditis elegans	2	0	0	0
G5EE59	R-CEL-1483166	http://www.reactome.org/PathwayBrowser/#/R-CEL-1483166	Synthesis of PA	IEA	Caenorhabditis elegans	2	0	0	0
G5EFP8	R-CEL-1483166	http://www.reactome.org/PathwayBrowser/#/R-CEL-1483166	Synthesis of PA	IEA	Caenorhabditis elegans	2	0	0	0
O16526	R-CEL-1483166	http://www.reactome.org/PathwayBrowser/#/R-CEL-1483166	Synthesis of PA	IEA	Caenorhabditis elegans	3	0	0	0
P34517	R-CEL-1483166	http://www.reactome.org/PathwayBrowser/#/R-CEL-1483166	Synthesis of PA	IEA	Caenorhabditis elegans	2	0	0	0
Q17790	R-CEL-1483166	http://www.reactome.org/PathwayBrowser/#/R-CEL-1483166	Synthesis of PA	IEA	Caenorhabditis elegans	6	0	0	0
Q1ZXU8	R-CEL-1483166	http://www.reactome.org/PathwayBrowser/#/R-CEL-1483166	Synthesis of PA	IEA	Caenorhabditis elegans	2	0	0	0
Q20800	R-CEL-1483166	http://www.reactome.org/PathwayBrowser/#/R-CEL-1483166	Synthesis of PA	IEA	Caenorhabditis elegans	3	0	0	0
Q21812	R-CEL-1483166	http://www.reactome.org/PathwayBrowser/#/R-CEL-1483166	Synthesis of PA	IEA	Caenorhabditis elegans	2	0	0	0
Q22267	R-CEL-1483166	http://www.reactome.org/PathwayBrowser/#/R-CEL-1483166	Synthesis of PA	IEA	Caenorhabditis elegans	3	0	0	0
Q22949	R-CEL-1483166	http://www.reactome.org/PathwayBrowser/#/R-CEL-1483166	Synthesis of PA	IEA	Caenorhabditis elegans	3	0	0	0
Q23087	R-CEL-1483166	http://www.reactome.org/PathwayBrowser/#/R-CEL-1483166	Synthesis of PA	IEA	Caenorhabditis elegans	3	0	0	0
Q95R12	R-CEL-1483166	http://www.reactome.org/PathwayBrowser/#/R-CEL-1483166	Synthesis of PA	IEA	Caenorhabditis elegans	2	0	0	0
Q9N5S8	R-CEL-1483166	http://www.reactome.org/PathwayBrowser/#/R-CEL-1483166	Synthesis of PA	IEA	Caenorhabditis elegans	2	0	0	0
Q9N5S9	R-CEL-1483166	http://www.reactome.org/PathwayBrowser/#/R-CEL-1483166	Synthesis of PA	IEA	Caenorhabditis elegans	2	0	0	0
Q9XTS4	R-CEL-1483166	http://www.reactome.org/PathwayBrowser/#/R-CEL-1483166	Synthesis of PA	IEA	Caenorhabditis elegans	2	0	0	0
A0A061AIW1	R-CEL-1483191	http://www.reactome.org/PathwayBrowser/#/R-CEL-1483191	Synthesis of PC	IEA	Caenorhabditis elegans	2	0	0	0
B3GWD5	R-CEL-1483191	http://www.reactome.org/PathwayBrowser/#/R-CEL-1483191	Synthesis of PC	IEA	Caenorhabditis elegans	2	0	0	0
G5EBS7	R-CEL-1483191	http://www.reactome.org/PathwayBrowser/#/R-CEL-1483191	Synthesis of PC	IEA	Caenorhabditis elegans	2	0	0	0
G5EC09	R-CEL-1483191	http://www.reactome.org/PathwayBrowser/#/R-CEL-1483191	Synthesis of PC	IEA	Caenorhabditis elegans	2	0	0	0
G5EC25	R-CEL-1483191	http://www.reactome.org/PathwayBrowser/#/R-CEL-1483191	Synthesis of PC	IEA	Caenorhabditis elegans	2	0	0	0
G5EDN1	R-CEL-1483191	http://www.reactome.org/PathwayBrowser/#/R-CEL-1483191	Synthesis of PC	IEA	Caenorhabditis elegans	2	0	0	0
G5EDV9	R-CEL-1483191	http://www.reactome.org/PathwayBrowser/#/R-CEL-1483191	Synthesis of PC	IEA	Caenorhabditis elegans	2	0	0	0
O17610	R-CEL-1483191	http://www.reactome.org/PathwayBrowser/#/R-CEL-1483191	Synthesis of PC	IEA	Caenorhabditis elegans	2	0	0	0
O61459	R-CEL-1483191	http://www.reactome.org/PathwayBrowser/#/R-CEL-1483191	Synthesis of PC	IEA	Caenorhabditis elegans	2	0	0	0
P38433	R-CEL-1483191	http://www.reactome.org/PathwayBrowser/#/R-CEL-1483191	Synthesis of PC	IEA	Caenorhabditis elegans	2	0	0	0
P46558	R-CEL-1483191	http://www.reactome.org/PathwayBrowser/#/R-CEL-1483191	Synthesis of PC	IEA	Caenorhabditis elegans	2	0	0	0
P46559	R-CEL-1483191	http://www.reactome.org/PathwayBrowser/#/R-CEL-1483191	Synthesis of PC	IEA	Caenorhabditis elegans	2	0	0	0
P46560	R-CEL-1483191	http://www.reactome.org/PathwayBrowser/#/R-CEL-1483191	Synthesis of PC	IEA	Caenorhabditis elegans	2	0	0	0
P49583	R-CEL-1483191	http://www.reactome.org/PathwayBrowser/#/R-CEL-1483191	Synthesis of PC	IEA	Caenorhabditis elegans	1	0	0	0
Q17499	R-CEL-1483191	http://www.reactome.org/PathwayBrowser/#/R-CEL-1483191	Synthesis of PC	IEA	Caenorhabditis elegans	4	0	0	0
Q18610	R-CEL-1483191	http://www.reactome.org/PathwayBrowser/#/R-CEL-1483191	Synthesis of PC	IEA	Caenorhabditis elegans	1	0	0	0
Q20026	R-CEL-1483191	http://www.reactome.org/PathwayBrowser/#/R-CEL-1483191	Synthesis of PC	IEA	Caenorhabditis elegans	2	0	0	0
Q22942	R-CEL-1483191	http://www.reactome.org/PathwayBrowser/#/R-CEL-1483191	Synthesis of PC	IEA	Caenorhabditis elegans	2	0	0	0
Q2XN11	R-CEL-1483191	http://www.reactome.org/PathwayBrowser/#/R-CEL-1483191	Synthesis of PC	IEA	Caenorhabditis elegans	2	0	0	0
Q8IU09	R-CEL-1483191	http://www.reactome.org/PathwayBrowser/#/R-CEL-1483191	Synthesis of PC	IEA	Caenorhabditis elegans	1	0	0	0
Q95YB8	R-CEL-1483191	http://www.reactome.org/PathwayBrowser/#/R-CEL-1483191	Synthesis of PC	IEA	Caenorhabditis elegans	1	0	0	0
Q9GZF3	R-CEL-1483191	http://www.reactome.org/PathwayBrowser/#/R-CEL-1483191	Synthesis of PC	IEA	Caenorhabditis elegans	2	1	0	0
Q9U1Z6	R-CEL-1483191	http://www.reactome.org/PathwayBrowser/#/R-CEL-1483191	Synthesis of PC	IEA	Caenorhabditis elegans	1	0	0	0
Q9U295	R-CEL-1483191	http://www.reactome.org/PathwayBrowser/#/R-CEL-1483191	Synthesis of PC	IEA	Caenorhabditis elegans	2	0	0	0
Q9XXT5	R-CEL-1483191	http://www.reactome.org/PathwayBrowser/#/R-CEL-1483191	Synthesis of PC	IEA	Caenorhabditis elegans	4	1	0	0
V6CIU7	R-CEL-1483191	http://www.reactome.org/PathwayBrowser/#/R-CEL-1483191	Synthesis of PC	IEA	Caenorhabditis elegans	1	0	0	0
V6CJZ8	R-CEL-1483191	http://www.reactome.org/PathwayBrowser/#/R-CEL-1483191	Synthesis of PC	IEA	Caenorhabditis elegans	1	0	0	0
V6CL91	R-CEL-1483191	http://www.reactome.org/PathwayBrowser/#/R-CEL-1483191	Synthesis of PC	IEA	Caenorhabditis elegans	1	0	0	0
Q965T2	R-CEL-1483196	http://www.reactome.org/PathwayBrowser/#/R-CEL-1483196	PI and PC transport between ER and Golgi membranes	IEA	Caenorhabditis elegans	2	1	0	0
Q965T2	R-CEL-1483196	http://www.reactome.org/PathwayBrowser/#/R-CEL-1483196	PI and PC transport between ER and Golgi membranes	IEA	Caenorhabditis elegans	2	1	0	0
Q09221	R-CEL-1483206	http://www.reactome.org/PathwayBrowser/#/R-CEL-1483206	Glycerophospholipid biosynthesis	IEA	Caenorhabditis elegans	1	0	0	0
A0A061AIW1	R-CEL-1483213	http://www.reactome.org/PathwayBrowser/#/R-CEL-1483213	Synthesis of PE	IEA	Caenorhabditis elegans	2	0	0	0
A9D2X7	R-CEL-1483213	http://www.reactome.org/PathwayBrowser/#/R-CEL-1483213	Synthesis of PE	IEA	Caenorhabditis elegans	1	0	0	0
B3GWD5	R-CEL-1483213	http://www.reactome.org/PathwayBrowser/#/R-CEL-1483213	Synthesis of PE	IEA	Caenorhabditis elegans	2	0	0	0
G5EBS7	R-CEL-1483213	http://www.reactome.org/PathwayBrowser/#/R-CEL-1483213	Synthesis of PE	IEA	Caenorhabditis elegans	2	0	0	0
G5EC09	R-CEL-1483213	http://www.reactome.org/PathwayBrowser/#/R-CEL-1483213	Synthesis of PE	IEA	Caenorhabditis elegans	2	0	0	0
G5EC25	R-CEL-1483213	http://www.reactome.org/PathwayBrowser/#/R-CEL-1483213	Synthesis of PE	IEA	Caenorhabditis elegans	2	0	0	0
O17610	R-CEL-1483213	http://www.reactome.org/PathwayBrowser/#/R-CEL-1483213	Synthesis of PE	IEA	Caenorhabditis elegans	2	0	0	0
O44732	R-CEL-1483213	http://www.reactome.org/PathwayBrowser/#/R-CEL-1483213	Synthesis of PE	IEA	Caenorhabditis elegans	1	0	0	0
P46558	R-CEL-1483213	http://www.reactome.org/PathwayBrowser/#/R-CEL-1483213	Synthesis of PE	IEA	Caenorhabditis elegans	2	0	0	0
P46559	R-CEL-1483213	http://www.reactome.org/PathwayBrowser/#/R-CEL-1483213	Synthesis of PE	IEA	Caenorhabditis elegans	2	0	0	0
P46560	R-CEL-1483213	http://www.reactome.org/PathwayBrowser/#/R-CEL-1483213	Synthesis of PE	IEA	Caenorhabditis elegans	2	0	0	0
P91408	R-CEL-1483213	http://www.reactome.org/PathwayBrowser/#/R-CEL-1483213	Synthesis of PE	IEA	Caenorhabditis elegans	3	0	0	0
Q22820	R-CEL-1483213	http://www.reactome.org/PathwayBrowser/#/R-CEL-1483213	Synthesis of PE	IEA	Caenorhabditis elegans	1	0	0	0
Q22942	R-CEL-1483213	http://www.reactome.org/PathwayBrowser/#/R-CEL-1483213	Synthesis of PE	IEA	Caenorhabditis elegans	2	0	0	0
Q2XN11	R-CEL-1483213	http://www.reactome.org/PathwayBrowser/#/R-CEL-1483213	Synthesis of PE	IEA	Caenorhabditis elegans	2	0	0	0
Q86MJ6	R-CEL-1483213	http://www.reactome.org/PathwayBrowser/#/R-CEL-1483213	Synthesis of PE	IEA	Caenorhabditis elegans	1	0	0	0
Q9BKU2	R-CEL-1483213	http://www.reactome.org/PathwayBrowser/#/R-CEL-1483213	Synthesis of PE	IEA	Caenorhabditis elegans	1	0	0	0
Q9GZF3	R-CEL-1483213	http://www.reactome.org/PathwayBrowser/#/R-CEL-1483213	Synthesis of PE	IEA	Caenorhabditis elegans	2	1	0	0
Q9XXT5	R-CEL-1483213	http://www.reactome.org/PathwayBrowser/#/R-CEL-1483213	Synthesis of PE	IEA	Caenorhabditis elegans	4	1	0	0
X5LPW7	R-CEL-1483213	http://www.reactome.org/PathwayBrowser/#/R-CEL-1483213	Synthesis of PE	IEA	Caenorhabditis elegans	1	0	0	0
X5LPX5	R-CEL-1483213	http://www.reactome.org/PathwayBrowser/#/R-CEL-1483213	Synthesis of PE	IEA	Caenorhabditis elegans	1	0	0	0
X5LV72	R-CEL-1483213	http://www.reactome.org/PathwayBrowser/#/R-CEL-1483213	Synthesis of PE	IEA	Caenorhabditis elegans	1	0	0	0
X5LV76	R-CEL-1483213	http://www.reactome.org/PathwayBrowser/#/R-CEL-1483213	Synthesis of PE	IEA	Caenorhabditis elegans	1	0	0	0
X5LX84	R-CEL-1483213	http://www.reactome.org/PathwayBrowser/#/R-CEL-1483213	Synthesis of PE	IEA	Caenorhabditis elegans	1	0	0	0
X5M5S8	R-CEL-1483213	http://www.reactome.org/PathwayBrowser/#/R-CEL-1483213	Synthesis of PE	IEA	Caenorhabditis elegans	1	0	0	0
X5M8X2	R-CEL-1483213	http://www.reactome.org/PathwayBrowser/#/R-CEL-1483213	Synthesis of PE	IEA	Caenorhabditis elegans	1	0	0	0
P53439	R-CEL-1483226	http://www.reactome.org/PathwayBrowser/#/R-CEL-1483226	Synthesis of PI	IEA	Caenorhabditis elegans	2	0	0	0
Q9U2G1	R-CEL-1483226	http://www.reactome.org/PathwayBrowser/#/R-CEL-1483226	Synthesis of PI	IEA	Caenorhabditis elegans	1	0	0	0
H2L2D3	R-CEL-1483248	http://www.reactome.org/PathwayBrowser/#/R-CEL-1483248	Synthesis of PIPs at the ER membrane	IEA	Caenorhabditis elegans	4	0	0	0
O45318	R-CEL-1483248	http://www.reactome.org/PathwayBrowser/#/R-CEL-1483248	Synthesis of PIPs at the ER membrane	IEA	Caenorhabditis elegans	4	0	0	0
Q23083	R-CEL-1483248	http://www.reactome.org/PathwayBrowser/#/R-CEL-1483248	Synthesis of PIPs at the ER membrane	IEA	Caenorhabditis elegans	4	0	0	0
Q93641	R-CEL-1483248	http://www.reactome.org/PathwayBrowser/#/R-CEL-1483248	Synthesis of PIPs at the ER membrane	IEA	Caenorhabditis elegans	2	0	0	0
P34722	R-CEL-1489509	http://www.reactome.org/PathwayBrowser/#/R-CEL-1489509	DAG and IP3 signaling	IEA	Caenorhabditis elegans	10	0	0	0
P34885	R-CEL-1489509	http://www.reactome.org/PathwayBrowser/#/R-CEL-1489509	DAG and IP3 signaling	IEA	Caenorhabditis elegans	3	0	0	0
A5HWA6	R-CEL-1538133	http://www.reactome.org/PathwayBrowser/#/R-CEL-1538133	G0 and Early G1	IEA	Caenorhabditis elegans	5	0	0	0
A5HWA7	R-CEL-1538133	http://www.reactome.org/PathwayBrowser/#/R-CEL-1538133	G0 and Early G1	IEA	Caenorhabditis elegans	5	0	0	0
A5HWA8	R-CEL-1538133	http://www.reactome.org/PathwayBrowser/#/R-CEL-1538133	G0 and Early G1	IEA	Caenorhabditis elegans	5	0	0	0
G5ECH0	R-CEL-1538133	http://www.reactome.org/PathwayBrowser/#/R-CEL-1538133	G0 and Early G1	IEA	Caenorhabditis elegans	2	0	0	0
G5ECQ8	R-CEL-1538133	http://www.reactome.org/PathwayBrowser/#/R-CEL-1538133	G0 and Early G1	IEA	Caenorhabditis elegans	2	0	0	0
G5EDT1	R-CEL-1538133	http://www.reactome.org/PathwayBrowser/#/R-CEL-1538133	G0 and Early G1	IEA	Caenorhabditis elegans	4	0	0	0
G5EF11	R-CEL-1538133	http://www.reactome.org/PathwayBrowser/#/R-CEL-1538133	G0 and Early G1	IEA	Caenorhabditis elegans	1	0	0	0
O02115	R-CEL-1538133	http://www.reactome.org/PathwayBrowser/#/R-CEL-1538133	G0 and Early G1	IEA	Caenorhabditis elegans	15	0	0	0
O17695	R-CEL-1538133	http://www.reactome.org/PathwayBrowser/#/R-CEL-1538133	G0 and Early G1	IEA	Caenorhabditis elegans	2	0	0	0
O44552	R-CEL-1538133	http://www.reactome.org/PathwayBrowser/#/R-CEL-1538133	G0 and Early G1	IEA	Caenorhabditis elegans	11	0	0	0
O44628	R-CEL-1538133	http://www.reactome.org/PathwayBrowser/#/R-CEL-1538133	G0 and Early G1	IEA	Caenorhabditis elegans	11	0	0	0
P30634	R-CEL-1538133	http://www.reactome.org/PathwayBrowser/#/R-CEL-1538133	G0 and Early G1	IEA	Caenorhabditis elegans	11	0	0	0
P91155	R-CEL-1538133	http://www.reactome.org/PathwayBrowser/#/R-CEL-1538133	G0 and Early G1	IEA	Caenorhabditis elegans	7	0	0	0
Q21762	R-CEL-1538133	http://www.reactome.org/PathwayBrowser/#/R-CEL-1538133	G0 and Early G1	IEA	Caenorhabditis elegans	11	0	0	0
Q22703	R-CEL-1538133	http://www.reactome.org/PathwayBrowser/#/R-CEL-1538133	G0 and Early G1	IEA	Caenorhabditis elegans	3	0	0	0
Q23670	R-CEL-1538133	http://www.reactome.org/PathwayBrowser/#/R-CEL-1538133	G0 and Early G1	IEA	Caenorhabditis elegans	2	0	0	0
Q9BIE8	R-CEL-1538133	http://www.reactome.org/PathwayBrowser/#/R-CEL-1538133	G0 and Early G1	IEA	Caenorhabditis elegans	5	0	0	0
Q9N4W3	R-CEL-1538133	http://www.reactome.org/PathwayBrowser/#/R-CEL-1538133	G0 and Early G1	IEA	Caenorhabditis elegans	2	0	0	0
Q9U289	R-CEL-1538133	http://www.reactome.org/PathwayBrowser/#/R-CEL-1538133	G0 and Early G1	IEA	Caenorhabditis elegans	5	0	0	0
D7SFI3	R-CEL-156581	http://www.reactome.org/PathwayBrowser/#/R-CEL-156581	Methylation	IEA	Caenorhabditis elegans	3	0	0	0
G5ECD0	R-CEL-156581	http://www.reactome.org/PathwayBrowser/#/R-CEL-156581	Methylation	IEA	Caenorhabditis elegans	10	0	0	1
G5ED86	R-CEL-156581	http://www.reactome.org/PathwayBrowser/#/R-CEL-156581	Methylation	IEA	Caenorhabditis elegans	10	0	0	0
G5EE22	R-CEL-156581	http://www.reactome.org/PathwayBrowser/#/R-CEL-156581	Methylation	IEA	Caenorhabditis elegans	10	0	0	0
H1ZUV4	R-CEL-156581	http://www.reactome.org/PathwayBrowser/#/R-CEL-156581	Methylation	IEA	Caenorhabditis elegans	10	0	0	0
H2KY68	R-CEL-156581	http://www.reactome.org/PathwayBrowser/#/R-CEL-156581	Methylation	IEA	Caenorhabditis elegans	10	0	0	0
H2KY69	R-CEL-156581	http://www.reactome.org/PathwayBrowser/#/R-CEL-156581	Methylation	IEA	Caenorhabditis elegans	10	0	0	0
H2KYS3	R-CEL-156581	http://www.reactome.org/PathwayBrowser/#/R-CEL-156581	Methylation	IEA	Caenorhabditis elegans	10	0	0	0
O02627	R-CEL-156581	http://www.reactome.org/PathwayBrowser/#/R-CEL-156581	Methylation	IEA	Caenorhabditis elegans	10	0	0	1
O02628	R-CEL-156581	http://www.reactome.org/PathwayBrowser/#/R-CEL-156581	Methylation	IEA	Caenorhabditis elegans	10	0	0	1
O02641	R-CEL-156581	http://www.reactome.org/PathwayBrowser/#/R-CEL-156581	Methylation	IEA	Caenorhabditis elegans	10	1	0	0
O16220	R-CEL-156581	http://www.reactome.org/PathwayBrowser/#/R-CEL-156581	Methylation	IEA	Caenorhabditis elegans	10	0	0	1
O16362	R-CEL-156581	http://www.reactome.org/PathwayBrowser/#/R-CEL-156581	Methylation	IEA	Caenorhabditis elegans	10	0	0	0
O16482	R-CEL-156581	http://www.reactome.org/PathwayBrowser/#/R-CEL-156581	Methylation	IEA	Caenorhabditis elegans	10	0	0	0
O16582	R-CEL-156581	http://www.reactome.org/PathwayBrowser/#/R-CEL-156581	Methylation	IEA	Caenorhabditis elegans	2	0	0	0
O16670	R-CEL-156581	http://www.reactome.org/PathwayBrowser/#/R-CEL-156581	Methylation	IEA	Caenorhabditis elegans	10	0	0	1
O16671	R-CEL-156581	http://www.reactome.org/PathwayBrowser/#/R-CEL-156581	Methylation	IEA	Caenorhabditis elegans	10	0	0	0
O16672	R-CEL-156581	http://www.reactome.org/PathwayBrowser/#/R-CEL-156581	Methylation	IEA	Caenorhabditis elegans	10	0	0	0
O16673	R-CEL-156581	http://www.reactome.org/PathwayBrowser/#/R-CEL-156581	Methylation	IEA	Caenorhabditis elegans	10	0	0	0
O17234	R-CEL-156581	http://www.reactome.org/PathwayBrowser/#/R-CEL-156581	Methylation	IEA	Caenorhabditis elegans	3	0	0	0
O17680	R-CEL-156581	http://www.reactome.org/PathwayBrowser/#/R-CEL-156581	Methylation	IEA	Caenorhabditis elegans	3	0	0	0
O44649	R-CEL-156581	http://www.reactome.org/PathwayBrowser/#/R-CEL-156581	Methylation	IEA	Caenorhabditis elegans	10	0	0	1
O44650	R-CEL-156581	http://www.reactome.org/PathwayBrowser/#/R-CEL-156581	Methylation	IEA	Caenorhabditis elegans	10	1	1	0
O44651	R-CEL-156581	http://www.reactome.org/PathwayBrowser/#/R-CEL-156581	Methylation	IEA	Caenorhabditis elegans	10	0	0	0
O44652	R-CEL-156581	http://www.reactome.org/PathwayBrowser/#/R-CEL-156581	Methylation	IEA	Caenorhabditis elegans	10	0	0	0
O44655	R-CEL-156581	http://www.reactome.org/PathwayBrowser/#/R-CEL-156581	Methylation	IEA	Caenorhabditis elegans	10	0	0	0
O44656	R-CEL-156581	http://www.reactome.org/PathwayBrowser/#/R-CEL-156581	Methylation	IEA	Caenorhabditis elegans	10	0	0	0
O44657	R-CEL-156581	http://www.reactome.org/PathwayBrowser/#/R-CEL-156581	Methylation	IEA	Caenorhabditis elegans	10	0	0	0
O44658	R-CEL-156581	http://www.reactome.org/PathwayBrowser/#/R-CEL-156581	Methylation	IEA	Caenorhabditis elegans	10	0	0	0
O44704	R-CEL-156581	http://www.reactome.org/PathwayBrowser/#/R-CEL-156581	Methylation	IEA	Caenorhabditis elegans	10	0	0	0
O44706	R-CEL-156581	http://www.reactome.org/PathwayBrowser/#/R-CEL-156581	Methylation	IEA	Caenorhabditis elegans	10	1	0	0
O45241	R-CEL-156581	http://www.reactome.org/PathwayBrowser/#/R-CEL-156581	Methylation	IEA	Caenorhabditis elegans	2	0	0	0
O45352	R-CEL-156581	http://www.reactome.org/PathwayBrowser/#/R-CEL-156581	Methylation	IEA	Caenorhabditis elegans	3	0	0	0
O45364	R-CEL-156581	http://www.reactome.org/PathwayBrowser/#/R-CEL-156581	Methylation	IEA	Caenorhabditis elegans	10	1	0	1
O45659	R-CEL-156581	http://www.reactome.org/PathwayBrowser/#/R-CEL-156581	Methylation	IEA	Caenorhabditis elegans	10	0	0	0
O61204	R-CEL-156581	http://www.reactome.org/PathwayBrowser/#/R-CEL-156581	Methylation	IEA	Caenorhabditis elegans	10	0	0	1
O61935	R-CEL-156581	http://www.reactome.org/PathwayBrowser/#/R-CEL-156581	Methylation	IEA	Caenorhabditis elegans	10	0	0	0
O62377	R-CEL-156581	http://www.reactome.org/PathwayBrowser/#/R-CEL-156581	Methylation	IEA	Caenorhabditis elegans	10	1	0	1
O62378	R-CEL-156581	http://www.reactome.org/PathwayBrowser/#/R-CEL-156581	Methylation	IEA	Caenorhabditis elegans	10	1	0	0
P27604	R-CEL-156581	http://www.reactome.org/PathwayBrowser/#/R-CEL-156581	Methylation	IEA	Caenorhabditis elegans	2	0	0	0
P34254	R-CEL-156581	http://www.reactome.org/PathwayBrowser/#/R-CEL-156581	Methylation	IEA	Caenorhabditis elegans	2	0	0	0
P34277	R-CEL-156581	http://www.reactome.org/PathwayBrowser/#/R-CEL-156581	Methylation	IEA	Caenorhabditis elegans	3	0	0	0
P34345	R-CEL-156581	http://www.reactome.org/PathwayBrowser/#/R-CEL-156581	Methylation	IEA	Caenorhabditis elegans	3	0	0	1
P50305	R-CEL-156581	http://www.reactome.org/PathwayBrowser/#/R-CEL-156581	Methylation	IEA	Caenorhabditis elegans	3	0	0	0
P90771	R-CEL-156581	http://www.reactome.org/PathwayBrowser/#/R-CEL-156581	Methylation	IEA	Caenorhabditis elegans	10	1	0	0
Q09582	R-CEL-156581	http://www.reactome.org/PathwayBrowser/#/R-CEL-156581	Methylation	IEA	Caenorhabditis elegans	3	0	0	0
Q17574	R-CEL-156581	http://www.reactome.org/PathwayBrowser/#/R-CEL-156581	Methylation	IEA	Caenorhabditis elegans	3	0	0	0
Q20308	R-CEL-156581	http://www.reactome.org/PathwayBrowser/#/R-CEL-156581	Methylation	IEA	Caenorhabditis elegans	2	0	0	0
Q22279	R-CEL-156581	http://www.reactome.org/PathwayBrowser/#/R-CEL-156581	Methylation	IEA	Caenorhabditis elegans	2	0	0	0
Q27465	R-CEL-156581	http://www.reactome.org/PathwayBrowser/#/R-CEL-156581	Methylation	IEA	Caenorhabditis elegans	10	0	0	0
Q27470	R-CEL-156581	http://www.reactome.org/PathwayBrowser/#/R-CEL-156581	Methylation	IEA	Caenorhabditis elegans	10	0	1	0
Q27471	R-CEL-156581	http://www.reactome.org/PathwayBrowser/#/R-CEL-156581	Methylation	IEA	Caenorhabditis elegans	10	0	0	1
Q27482	R-CEL-156581	http://www.reactome.org/PathwayBrowser/#/R-CEL-156581	Methylation	IEA	Caenorhabditis elegans	10	0	0	0
Q27499	R-CEL-156581	http://www.reactome.org/PathwayBrowser/#/R-CEL-156581	Methylation	IEA	Caenorhabditis elegans	10	0	0	0
Q27505	R-CEL-156581	http://www.reactome.org/PathwayBrowser/#/R-CEL-156581	Methylation	IEA	Caenorhabditis elegans	10	0	0	1
Q27506	R-CEL-156581	http://www.reactome.org/PathwayBrowser/#/R-CEL-156581	Methylation	IEA	Caenorhabditis elegans	10	0	0	1
Q27507	R-CEL-156581	http://www.reactome.org/PathwayBrowser/#/R-CEL-156581	Methylation	IEA	Caenorhabditis elegans	10	0	0	1
Q27522	R-CEL-156581	http://www.reactome.org/PathwayBrowser/#/R-CEL-156581	Methylation	IEA	Caenorhabditis elegans	3	0	0	0
Q27531	R-CEL-156581	http://www.reactome.org/PathwayBrowser/#/R-CEL-156581	Methylation	IEA	Caenorhabditis elegans	10	1	0	0
Q2MGF0	R-CEL-156581	http://www.reactome.org/PathwayBrowser/#/R-CEL-156581	Methylation	IEA	Caenorhabditis elegans	10	0	0	0
Q8IA74	R-CEL-156581	http://www.reactome.org/PathwayBrowser/#/R-CEL-156581	Methylation	IEA	Caenorhabditis elegans	3	0	0	0
Q965T7	R-CEL-156581	http://www.reactome.org/PathwayBrowser/#/R-CEL-156581	Methylation	IEA	Caenorhabditis elegans	10	0	0	0
Q9N4Q4	R-CEL-156581	http://www.reactome.org/PathwayBrowser/#/R-CEL-156581	Methylation	IEA	Caenorhabditis elegans	10	0	0	0
Q9N5I1	R-CEL-156581	http://www.reactome.org/PathwayBrowser/#/R-CEL-156581	Methylation	IEA	Caenorhabditis elegans	10	0	0	1
Q23493	R-CEL-156584	http://www.reactome.org/PathwayBrowser/#/R-CEL-156584	Cytosolic sulfonation of small molecules	IEA	Caenorhabditis elegans	1	0	0	0
Q9N366	R-CEL-156584	http://www.reactome.org/PathwayBrowser/#/R-CEL-156584	Cytosolic sulfonation of small molecules	IEA	Caenorhabditis elegans	1	0	0	0
Q20086	R-CEL-156588	http://www.reactome.org/PathwayBrowser/#/R-CEL-156588	Glucuronidation	IEA	Caenorhabditis elegans	3	0	0	0
D7SFI3	R-CEL-156590	http://www.reactome.org/PathwayBrowser/#/R-CEL-156590	Glutathione conjugation	IEA	Caenorhabditis elegans	3	0	0	0
G5ECL9	R-CEL-156590	http://www.reactome.org/PathwayBrowser/#/R-CEL-156590	Glutathione conjugation	IEA	Caenorhabditis elegans	1	0	1	1
G5EF86	R-CEL-156590	http://www.reactome.org/PathwayBrowser/#/R-CEL-156590	Glutathione conjugation	IEA	Caenorhabditis elegans	1	0	0	0
O17234	R-CEL-156590	http://www.reactome.org/PathwayBrowser/#/R-CEL-156590	Glutathione conjugation	IEA	Caenorhabditis elegans	3	0	0	0
O45352	R-CEL-156590	http://www.reactome.org/PathwayBrowser/#/R-CEL-156590	Glutathione conjugation	IEA	Caenorhabditis elegans	3	0	0	0
O61750	R-CEL-156590	http://www.reactome.org/PathwayBrowser/#/R-CEL-156590	Glutathione conjugation	IEA	Caenorhabditis elegans	2	0	0	1
P10299	R-CEL-156590	http://www.reactome.org/PathwayBrowser/#/R-CEL-156590	Glutathione conjugation	IEA	Caenorhabditis elegans	2	0	0	0
P34277	R-CEL-156590	http://www.reactome.org/PathwayBrowser/#/R-CEL-156590	Glutathione conjugation	IEA	Caenorhabditis elegans	3	0	0	0
P34345	R-CEL-156590	http://www.reactome.org/PathwayBrowser/#/R-CEL-156590	Glutathione conjugation	IEA	Caenorhabditis elegans	3	0	0	1
P91505	R-CEL-156590	http://www.reactome.org/PathwayBrowser/#/R-CEL-156590	Glutathione conjugation	IEA	Caenorhabditis elegans	2	0	0	0
Q09652	R-CEL-156590	http://www.reactome.org/PathwayBrowser/#/R-CEL-156590	Glutathione conjugation	IEA	Caenorhabditis elegans	1	0	0	0
Q18938	R-CEL-156590	http://www.reactome.org/PathwayBrowser/#/R-CEL-156590	Glutathione conjugation	IEA	Caenorhabditis elegans	2	0	0	0
Q18973	R-CEL-156590	http://www.reactome.org/PathwayBrowser/#/R-CEL-156590	Glutathione conjugation	IEA	Caenorhabditis elegans	1	0	0	0
Q21945	R-CEL-156590	http://www.reactome.org/PathwayBrowser/#/R-CEL-156590	Glutathione conjugation	IEA	Caenorhabditis elegans	2	0	0	0
Q22352	R-CEL-156590	http://www.reactome.org/PathwayBrowser/#/R-CEL-156590	Glutathione conjugation	IEA	Caenorhabditis elegans	11	0	0	0
Q8IA74	R-CEL-156590	http://www.reactome.org/PathwayBrowser/#/R-CEL-156590	Glutathione conjugation	IEA	Caenorhabditis elegans	3	0	0	0
Q966G8	R-CEL-156590	http://www.reactome.org/PathwayBrowser/#/R-CEL-156590	Glutathione conjugation	IEA	Caenorhabditis elegans	1	0	0	0
Q9N4H6	R-CEL-156590	http://www.reactome.org/PathwayBrowser/#/R-CEL-156590	Glutathione conjugation	IEA	Caenorhabditis elegans	2	0	0	0
Q9N4S0	R-CEL-156590	http://www.reactome.org/PathwayBrowser/#/R-CEL-156590	Glutathione conjugation	IEA	Caenorhabditis elegans	2	0	0	0
Q9N4X8	R-CEL-156590	http://www.reactome.org/PathwayBrowser/#/R-CEL-156590	Glutathione conjugation	IEA	Caenorhabditis elegans	1	0	0	0
Q9N5R3	R-CEL-156590	http://www.reactome.org/PathwayBrowser/#/R-CEL-156590	Glutathione conjugation	IEA	Caenorhabditis elegans	1	0	0	0
Q9NAI5	R-CEL-156590	http://www.reactome.org/PathwayBrowser/#/R-CEL-156590	Glutathione conjugation	IEA	Caenorhabditis elegans	11	0	0	0
Q9U2J5	R-CEL-156590	http://www.reactome.org/PathwayBrowser/#/R-CEL-156590	Glutathione conjugation	IEA	Caenorhabditis elegans	11	0	0	0
Q9U2J6	R-CEL-156590	http://www.reactome.org/PathwayBrowser/#/R-CEL-156590	Glutathione conjugation	IEA	Caenorhabditis elegans	11	0	0	0
P34446	R-CEL-1566977	http://www.reactome.org/PathwayBrowser/#/R-CEL-1566977	Fibronectin matrix formation	IEA	Caenorhabditis elegans	10	0	0	0
Q27874	R-CEL-1566977	http://www.reactome.org/PathwayBrowser/#/R-CEL-1566977	Fibronectin matrix formation	IEA	Caenorhabditis elegans	13	0	0	0
Q5ZR75	R-CEL-1566977	http://www.reactome.org/PathwayBrowser/#/R-CEL-1566977	Fibronectin matrix formation	IEA	Caenorhabditis elegans	12	0	0	0
O18209	R-CEL-156711	http://www.reactome.org/PathwayBrowser/#/R-CEL-156711	Polo-like kinase mediated events	IEA	Caenorhabditis elegans	3	0	0	0
O44552	R-CEL-156711	http://www.reactome.org/PathwayBrowser/#/R-CEL-156711	Polo-like kinase mediated events	IEA	Caenorhabditis elegans	11	0	0	0
O44628	R-CEL-156711	http://www.reactome.org/PathwayBrowser/#/R-CEL-156711	Polo-like kinase mediated events	IEA	Caenorhabditis elegans	11	0	0	0
P30634	R-CEL-156711	http://www.reactome.org/PathwayBrowser/#/R-CEL-156711	Polo-like kinase mediated events	IEA	Caenorhabditis elegans	11	0	0	0
P34331	R-CEL-156711	http://www.reactome.org/PathwayBrowser/#/R-CEL-156711	Polo-like kinase mediated events	IEA	Caenorhabditis elegans	6	0	0	0
Q20085	R-CEL-156711	http://www.reactome.org/PathwayBrowser/#/R-CEL-156711	Polo-like kinase mediated events	IEA	Caenorhabditis elegans	3	0	0	0
Q20845	R-CEL-156711	http://www.reactome.org/PathwayBrowser/#/R-CEL-156711	Polo-like kinase mediated events	IEA	Caenorhabditis elegans	6	0	0	0
Q21762	R-CEL-156711	http://www.reactome.org/PathwayBrowser/#/R-CEL-156711	Polo-like kinase mediated events	IEA	Caenorhabditis elegans	11	0	0	0
Q9N2L7	R-CEL-156711	http://www.reactome.org/PathwayBrowser/#/R-CEL-156711	Polo-like kinase mediated events	IEA	Caenorhabditis elegans	6	0	0	0
A3QMC5	R-CEL-156827	http://www.reactome.org/PathwayBrowser/#/R-CEL-156827	L13a-mediated translational silencing of Ceruloplasmin expression	IEA	Caenorhabditis elegans	6	0	0	0
A8WIR1	R-CEL-156827	http://www.reactome.org/PathwayBrowser/#/R-CEL-156827	L13a-mediated translational silencing of Ceruloplasmin expression	IEA	Caenorhabditis elegans	9	0	0	0
B5BM23	R-CEL-156827	http://www.reactome.org/PathwayBrowser/#/R-CEL-156827	L13a-mediated translational silencing of Ceruloplasmin expression	IEA	Caenorhabditis elegans	7	0	0	0
B5BM24	R-CEL-156827	http://www.reactome.org/PathwayBrowser/#/R-CEL-156827	L13a-mediated translational silencing of Ceruloplasmin expression	IEA	Caenorhabditis elegans	7	0	0	0
B5BM25	R-CEL-156827	http://www.reactome.org/PathwayBrowser/#/R-CEL-156827	L13a-mediated translational silencing of Ceruloplasmin expression	IEA	Caenorhabditis elegans	7	0	0	0
B7WN95	R-CEL-156827	http://www.reactome.org/PathwayBrowser/#/R-CEL-156827	L13a-mediated translational silencing of Ceruloplasmin expression	IEA	Caenorhabditis elegans	6	0	0	0
D3YT71	R-CEL-156827	http://www.reactome.org/PathwayBrowser/#/R-CEL-156827	L13a-mediated translational silencing of Ceruloplasmin expression	IEA	Caenorhabditis elegans	6	0	0	0
I2HAJ2	R-CEL-156827	http://www.reactome.org/PathwayBrowser/#/R-CEL-156827	L13a-mediated translational silencing of Ceruloplasmin expression	IEA	Caenorhabditis elegans	6	0	0	0
O01504	R-CEL-156827	http://www.reactome.org/PathwayBrowser/#/R-CEL-156827	L13a-mediated translational silencing of Ceruloplasmin expression	IEA	Caenorhabditis elegans	6	0	0	0
O01692	R-CEL-156827	http://www.reactome.org/PathwayBrowser/#/R-CEL-156827	L13a-mediated translational silencing of Ceruloplasmin expression	IEA	Caenorhabditis elegans	9	0	0	0
O01802	R-CEL-156827	http://www.reactome.org/PathwayBrowser/#/R-CEL-156827	L13a-mediated translational silencing of Ceruloplasmin expression	IEA	Caenorhabditis elegans	6	0	0	0
O01868	R-CEL-156827	http://www.reactome.org/PathwayBrowser/#/R-CEL-156827	L13a-mediated translational silencing of Ceruloplasmin expression	IEA	Caenorhabditis elegans	6	0	0	0
O01869	R-CEL-156827	http://www.reactome.org/PathwayBrowser/#/R-CEL-156827	L13a-mediated translational silencing of Ceruloplasmin expression	IEA	Caenorhabditis elegans	9	0	0	0
O01974	R-CEL-156827	http://www.reactome.org/PathwayBrowser/#/R-CEL-156827	L13a-mediated translational silencing of Ceruloplasmin expression	IEA	Caenorhabditis elegans	4	0	0	0
O02056	R-CEL-156827	http://www.reactome.org/PathwayBrowser/#/R-CEL-156827	L13a-mediated translational silencing of Ceruloplasmin expression	IEA	Caenorhabditis elegans	6	0	0	0
O02328	R-CEL-156827	http://www.reactome.org/PathwayBrowser/#/R-CEL-156827	L13a-mediated translational silencing of Ceruloplasmin expression	IEA	Caenorhabditis elegans	4	0	0	0
O02639	R-CEL-156827	http://www.reactome.org/PathwayBrowser/#/R-CEL-156827	L13a-mediated translational silencing of Ceruloplasmin expression	IEA	Caenorhabditis elegans	6	0	0	0
O16656	R-CEL-156827	http://www.reactome.org/PathwayBrowser/#/R-CEL-156827	L13a-mediated translational silencing of Ceruloplasmin expression	IEA	Caenorhabditis elegans	4	0	0	0
O17218	R-CEL-156827	http://www.reactome.org/PathwayBrowser/#/R-CEL-156827	L13a-mediated translational silencing of Ceruloplasmin expression	IEA	Caenorhabditis elegans	9	0	0	0
O17570	R-CEL-156827	http://www.reactome.org/PathwayBrowser/#/R-CEL-156827	L13a-mediated translational silencing of Ceruloplasmin expression	IEA	Caenorhabditis elegans	6	0	0	0
O18240	R-CEL-156827	http://www.reactome.org/PathwayBrowser/#/R-CEL-156827	L13a-mediated translational silencing of Ceruloplasmin expression	IEA	Caenorhabditis elegans	9	0	0	0
O18650	R-CEL-156827	http://www.reactome.org/PathwayBrowser/#/R-CEL-156827	L13a-mediated translational silencing of Ceruloplasmin expression	IEA	Caenorhabditis elegans	9	0	0	0
O44480	R-CEL-156827	http://www.reactome.org/PathwayBrowser/#/R-CEL-156827	L13a-mediated translational silencing of Ceruloplasmin expression	IEA	Caenorhabditis elegans	6	0	0	0
O45226	R-CEL-156827	http://www.reactome.org/PathwayBrowser/#/R-CEL-156827	L13a-mediated translational silencing of Ceruloplasmin expression	IEA	Caenorhabditis elegans	6	0	0	0
O45499	R-CEL-156827	http://www.reactome.org/PathwayBrowser/#/R-CEL-156827	L13a-mediated translational silencing of Ceruloplasmin expression	IEA	Caenorhabditis elegans	9	0	0	0
O45551	R-CEL-156827	http://www.reactome.org/PathwayBrowser/#/R-CEL-156827	L13a-mediated translational silencing of Ceruloplasmin expression	IEA	Caenorhabditis elegans	4	0	0	0
O45946	R-CEL-156827	http://www.reactome.org/PathwayBrowser/#/R-CEL-156827	L13a-mediated translational silencing of Ceruloplasmin expression	IEA	Caenorhabditis elegans	6	0	0	0
O61820	R-CEL-156827	http://www.reactome.org/PathwayBrowser/#/R-CEL-156827	L13a-mediated translational silencing of Ceruloplasmin expression	IEA	Caenorhabditis elegans	4	0	0	0
O61955	R-CEL-156827	http://www.reactome.org/PathwayBrowser/#/R-CEL-156827	L13a-mediated translational silencing of Ceruloplasmin expression	IEA	Caenorhabditis elegans	4	0	0	0
O62388	R-CEL-156827	http://www.reactome.org/PathwayBrowser/#/R-CEL-156827	L13a-mediated translational silencing of Ceruloplasmin expression	IEA	Caenorhabditis elegans	6	0	0	0
P27639	R-CEL-156827	http://www.reactome.org/PathwayBrowser/#/R-CEL-156827	L13a-mediated translational silencing of Ceruloplasmin expression	IEA	Caenorhabditis elegans	4	0	0	0
P30642	R-CEL-156827	http://www.reactome.org/PathwayBrowser/#/R-CEL-156827	L13a-mediated translational silencing of Ceruloplasmin expression	IEA	Caenorhabditis elegans	4	0	0	0
P34334	R-CEL-156827	http://www.reactome.org/PathwayBrowser/#/R-CEL-156827	L13a-mediated translational silencing of Ceruloplasmin expression	IEA	Caenorhabditis elegans	6	0	0	0
P34339	R-CEL-156827	http://www.reactome.org/PathwayBrowser/#/R-CEL-156827	L13a-mediated translational silencing of Ceruloplasmin expression	IEA	Caenorhabditis elegans	4	0	0	0
P34662	R-CEL-156827	http://www.reactome.org/PathwayBrowser/#/R-CEL-156827	L13a-mediated translational silencing of Ceruloplasmin expression	IEA	Caenorhabditis elegans	6	0	0	0
P37165	R-CEL-156827	http://www.reactome.org/PathwayBrowser/#/R-CEL-156827	L13a-mediated translational silencing of Ceruloplasmin expression	IEA	Caenorhabditis elegans	51	0	0	0
P46769	R-CEL-156827	http://www.reactome.org/PathwayBrowser/#/R-CEL-156827	L13a-mediated translational silencing of Ceruloplasmin expression	IEA	Caenorhabditis elegans	9	0	0	0
P47991	R-CEL-156827	http://www.reactome.org/PathwayBrowser/#/R-CEL-156827	L13a-mediated translational silencing of Ceruloplasmin expression	IEA	Caenorhabditis elegans	6	0	0	0
P48150	R-CEL-156827	http://www.reactome.org/PathwayBrowser/#/R-CEL-156827	L13a-mediated translational silencing of Ceruloplasmin expression	IEA	Caenorhabditis elegans	9	0	0	0
P48152	R-CEL-156827	http://www.reactome.org/PathwayBrowser/#/R-CEL-156827	L13a-mediated translational silencing of Ceruloplasmin expression	IEA	Caenorhabditis elegans	9	0	0	0
P48154	R-CEL-156827	http://www.reactome.org/PathwayBrowser/#/R-CEL-156827	L13a-mediated translational silencing of Ceruloplasmin expression	IEA	Caenorhabditis elegans	9	0	0	0
P48156	R-CEL-156827	http://www.reactome.org/PathwayBrowser/#/R-CEL-156827	L13a-mediated translational silencing of Ceruloplasmin expression	IEA	Caenorhabditis elegans	9	0	0	0
P48158	R-CEL-156827	http://www.reactome.org/PathwayBrowser/#/R-CEL-156827	L13a-mediated translational silencing of Ceruloplasmin expression	IEA	Caenorhabditis elegans	6	0	0	0
P48162	R-CEL-156827	http://www.reactome.org/PathwayBrowser/#/R-CEL-156827	L13a-mediated translational silencing of Ceruloplasmin expression	IEA	Caenorhabditis elegans	6	0	0	0
P48166	R-CEL-156827	http://www.reactome.org/PathwayBrowser/#/R-CEL-156827	L13a-mediated translational silencing of Ceruloplasmin expression	IEA	Caenorhabditis elegans	6	0	0	0
P49041	R-CEL-156827	http://www.reactome.org/PathwayBrowser/#/R-CEL-156827	L13a-mediated translational silencing of Ceruloplasmin expression	IEA	Caenorhabditis elegans	9	0	0	0
P49180	R-CEL-156827	http://www.reactome.org/PathwayBrowser/#/R-CEL-156827	L13a-mediated translational silencing of Ceruloplasmin expression	IEA	Caenorhabditis elegans	6	0	0	0
P49181	R-CEL-156827	http://www.reactome.org/PathwayBrowser/#/R-CEL-156827	L13a-mediated translational silencing of Ceruloplasmin expression	IEA	Caenorhabditis elegans	6	0	0	0
P49196	R-CEL-156827	http://www.reactome.org/PathwayBrowser/#/R-CEL-156827	L13a-mediated translational silencing of Ceruloplasmin expression	IEA	Caenorhabditis elegans	9	0	0	0
P49197	R-CEL-156827	http://www.reactome.org/PathwayBrowser/#/R-CEL-156827	L13a-mediated translational silencing of Ceruloplasmin expression	IEA	Caenorhabditis elegans	9	0	0	0
P49405	R-CEL-156827	http://www.reactome.org/PathwayBrowser/#/R-CEL-156827	L13a-mediated translational silencing of Ceruloplasmin expression	IEA	Caenorhabditis elegans	6	0	0	0
P49622	R-CEL-156827	http://www.reactome.org/PathwayBrowser/#/R-CEL-156827	L13a-mediated translational silencing of Ceruloplasmin expression	IEA	Caenorhabditis elegans	6	0	0	0
P49632	R-CEL-156827	http://www.reactome.org/PathwayBrowser/#/R-CEL-156827	L13a-mediated translational silencing of Ceruloplasmin expression	IEA	Caenorhabditis elegans	48	0	0	0
P50880	R-CEL-156827	http://www.reactome.org/PathwayBrowser/#/R-CEL-156827	L13a-mediated translational silencing of Ceruloplasmin expression	IEA	Caenorhabditis elegans	6	0	0	0
P51403	R-CEL-156827	http://www.reactome.org/PathwayBrowser/#/R-CEL-156827	L13a-mediated translational silencing of Ceruloplasmin expression	IEA	Caenorhabditis elegans	9	0	0	0
P51404	R-CEL-156827	http://www.reactome.org/PathwayBrowser/#/R-CEL-156827	L13a-mediated translational silencing of Ceruloplasmin expression	IEA	Caenorhabditis elegans	9	0	0	0
P52814	R-CEL-156827	http://www.reactome.org/PathwayBrowser/#/R-CEL-156827	L13a-mediated translational silencing of Ceruloplasmin expression	IEA	Caenorhabditis elegans	6	0	0	0
P52819	R-CEL-156827	http://www.reactome.org/PathwayBrowser/#/R-CEL-156827	L13a-mediated translational silencing of Ceruloplasmin expression	IEA	Caenorhabditis elegans	6	0	0	0
P52821	R-CEL-156827	http://www.reactome.org/PathwayBrowser/#/R-CEL-156827	L13a-mediated translational silencing of Ceruloplasmin expression	IEA	Caenorhabditis elegans	9	0	0	0
P56570	R-CEL-156827	http://www.reactome.org/PathwayBrowser/#/R-CEL-156827	L13a-mediated translational silencing of Ceruloplasmin expression	IEA	Caenorhabditis elegans	4	0	0	0
P61866	R-CEL-156827	http://www.reactome.org/PathwayBrowser/#/R-CEL-156827	L13a-mediated translational silencing of Ceruloplasmin expression	IEA	Caenorhabditis elegans	6	0	0	0
P90983	R-CEL-156827	http://www.reactome.org/PathwayBrowser/#/R-CEL-156827	L13a-mediated translational silencing of Ceruloplasmin expression	IEA	Caenorhabditis elegans	9	0	0	0
P91128	R-CEL-156827	http://www.reactome.org/PathwayBrowser/#/R-CEL-156827	L13a-mediated translational silencing of Ceruloplasmin expression	IEA	Caenorhabditis elegans	6	0	0	0
P91374	R-CEL-156827	http://www.reactome.org/PathwayBrowser/#/R-CEL-156827	L13a-mediated translational silencing of Ceruloplasmin expression	IEA	Caenorhabditis elegans	6	0	0	0
P91913	R-CEL-156827	http://www.reactome.org/PathwayBrowser/#/R-CEL-156827	L13a-mediated translational silencing of Ceruloplasmin expression	IEA	Caenorhabditis elegans	6	0	0	0
P91914	R-CEL-156827	http://www.reactome.org/PathwayBrowser/#/R-CEL-156827	L13a-mediated translational silencing of Ceruloplasmin expression	IEA	Caenorhabditis elegans	6	0	0	0
Q09533	R-CEL-156827	http://www.reactome.org/PathwayBrowser/#/R-CEL-156827	L13a-mediated translational silencing of Ceruloplasmin expression	IEA	Caenorhabditis elegans	6	0	0	0
Q09557	R-CEL-156827	http://www.reactome.org/PathwayBrowser/#/R-CEL-156827	L13a-mediated translational silencing of Ceruloplasmin expression	IEA	Caenorhabditis elegans	51	0	0	0
Q18231	R-CEL-156827	http://www.reactome.org/PathwayBrowser/#/R-CEL-156827	L13a-mediated translational silencing of Ceruloplasmin expression	IEA	Caenorhabditis elegans	9	0	0	0
Q18967	R-CEL-156827	http://www.reactome.org/PathwayBrowser/#/R-CEL-156827	L13a-mediated translational silencing of Ceruloplasmin expression	IEA	Caenorhabditis elegans	4	0	0	0
Q19162	R-CEL-156827	http://www.reactome.org/PathwayBrowser/#/R-CEL-156827	L13a-mediated translational silencing of Ceruloplasmin expression	IEA	Caenorhabditis elegans	6	0	0	0
Q19706	R-CEL-156827	http://www.reactome.org/PathwayBrowser/#/R-CEL-156827	L13a-mediated translational silencing of Ceruloplasmin expression	IEA	Caenorhabditis elegans	4	0	0	0
Q19869	R-CEL-156827	http://www.reactome.org/PathwayBrowser/#/R-CEL-156827	L13a-mediated translational silencing of Ceruloplasmin expression	IEA	Caenorhabditis elegans	6	0	0	0
Q19877	R-CEL-156827	http://www.reactome.org/PathwayBrowser/#/R-CEL-156827	L13a-mediated translational silencing of Ceruloplasmin expression	IEA	Caenorhabditis elegans	9	0	0	0
Q1XFY9	R-CEL-156827	http://www.reactome.org/PathwayBrowser/#/R-CEL-156827	L13a-mediated translational silencing of Ceruloplasmin expression	IEA	Caenorhabditis elegans	9	0	0	0
Q20206	R-CEL-156827	http://www.reactome.org/PathwayBrowser/#/R-CEL-156827	L13a-mediated translational silencing of Ceruloplasmin expression	IEA	Caenorhabditis elegans	9	0	0	0
Q20228	R-CEL-156827	http://www.reactome.org/PathwayBrowser/#/R-CEL-156827	L13a-mediated translational silencing of Ceruloplasmin expression	IEA	Caenorhabditis elegans	9	0	0	0
Q20647	R-CEL-156827	http://www.reactome.org/PathwayBrowser/#/R-CEL-156827	L13a-mediated translational silencing of Ceruloplasmin expression	IEA	Caenorhabditis elegans	6	0	0	0
Q20935	R-CEL-156827	http://www.reactome.org/PathwayBrowser/#/R-CEL-156827	L13a-mediated translational silencing of Ceruloplasmin expression	IEA	Caenorhabditis elegans	4	1	0	0
Q21230	R-CEL-156827	http://www.reactome.org/PathwayBrowser/#/R-CEL-156827	L13a-mediated translational silencing of Ceruloplasmin expression	IEA	Caenorhabditis elegans	5	0	0	0
Q21531	R-CEL-156827	http://www.reactome.org/PathwayBrowser/#/R-CEL-156827	L13a-mediated translational silencing of Ceruloplasmin expression	IEA	Caenorhabditis elegans	7	0	0	0
Q21693	R-CEL-156827	http://www.reactome.org/PathwayBrowser/#/R-CEL-156827	L13a-mediated translational silencing of Ceruloplasmin expression	IEA	Caenorhabditis elegans	4	0	0	0
Q22054	R-CEL-156827	http://www.reactome.org/PathwayBrowser/#/R-CEL-156827	L13a-mediated translational silencing of Ceruloplasmin expression	IEA	Caenorhabditis elegans	9	0	0	0
Q22716	R-CEL-156827	http://www.reactome.org/PathwayBrowser/#/R-CEL-156827	L13a-mediated translational silencing of Ceruloplasmin expression	IEA	Caenorhabditis elegans	6	0	0	0
Q23312	R-CEL-156827	http://www.reactome.org/PathwayBrowser/#/R-CEL-156827	L13a-mediated translational silencing of Ceruloplasmin expression	IEA	Caenorhabditis elegans	9	0	0	0
Q27389	R-CEL-156827	http://www.reactome.org/PathwayBrowser/#/R-CEL-156827	L13a-mediated translational silencing of Ceruloplasmin expression	IEA	Caenorhabditis elegans	6	0	0	0
Q7JMF0	R-CEL-156827	http://www.reactome.org/PathwayBrowser/#/R-CEL-156827	L13a-mediated translational silencing of Ceruloplasmin expression	IEA	Caenorhabditis elegans	7	0	0	0
Q8MXR8	R-CEL-156827	http://www.reactome.org/PathwayBrowser/#/R-CEL-156827	L13a-mediated translational silencing of Ceruloplasmin expression	IEA	Caenorhabditis elegans	6	0	0	0
Q8WQA8	R-CEL-156827	http://www.reactome.org/PathwayBrowser/#/R-CEL-156827	L13a-mediated translational silencing of Ceruloplasmin expression	IEA	Caenorhabditis elegans	9	0	0	0
Q93572	R-CEL-156827	http://www.reactome.org/PathwayBrowser/#/R-CEL-156827	L13a-mediated translational silencing of Ceruloplasmin expression	IEA	Caenorhabditis elegans	6	0	0	0
Q94261	R-CEL-156827	http://www.reactome.org/PathwayBrowser/#/R-CEL-156827	L13a-mediated translational silencing of Ceruloplasmin expression	IEA	Caenorhabditis elegans	4	0	0	0
Q94300	R-CEL-156827	http://www.reactome.org/PathwayBrowser/#/R-CEL-156827	L13a-mediated translational silencing of Ceruloplasmin expression	IEA	Caenorhabditis elegans	6	0	0	0
Q95QW0	R-CEL-156827	http://www.reactome.org/PathwayBrowser/#/R-CEL-156827	L13a-mediated translational silencing of Ceruloplasmin expression	IEA	Caenorhabditis elegans	4	0	0	0
Q95XE4	R-CEL-156827	http://www.reactome.org/PathwayBrowser/#/R-CEL-156827	L13a-mediated translational silencing of Ceruloplasmin expression	IEA	Caenorhabditis elegans	6	0	0	0
Q95XR0	R-CEL-156827	http://www.reactome.org/PathwayBrowser/#/R-CEL-156827	L13a-mediated translational silencing of Ceruloplasmin expression	IEA	Caenorhabditis elegans	5	0	0	0
Q95Y04	R-CEL-156827	http://www.reactome.org/PathwayBrowser/#/R-CEL-156827	L13a-mediated translational silencing of Ceruloplasmin expression	IEA	Caenorhabditis elegans	9	0	0	0
Q95Y90	R-CEL-156827	http://www.reactome.org/PathwayBrowser/#/R-CEL-156827	L13a-mediated translational silencing of Ceruloplasmin expression	IEA	Caenorhabditis elegans	6	0	0	0
Q965S8	R-CEL-156827	http://www.reactome.org/PathwayBrowser/#/R-CEL-156827	L13a-mediated translational silencing of Ceruloplasmin expression	IEA	Caenorhabditis elegans	4	0	0	0
Q966C6	R-CEL-156827	http://www.reactome.org/PathwayBrowser/#/R-CEL-156827	L13a-mediated translational silencing of Ceruloplasmin expression	IEA	Caenorhabditis elegans	6	0	0	0
Q9BKU3	R-CEL-156827	http://www.reactome.org/PathwayBrowser/#/R-CEL-156827	L13a-mediated translational silencing of Ceruloplasmin expression	IEA	Caenorhabditis elegans	6	0	0	0
Q9BKU5	R-CEL-156827	http://www.reactome.org/PathwayBrowser/#/R-CEL-156827	L13a-mediated translational silencing of Ceruloplasmin expression	IEA	Caenorhabditis elegans	6	0	0	0
Q9BKU6	R-CEL-156827	http://www.reactome.org/PathwayBrowser/#/R-CEL-156827	L13a-mediated translational silencing of Ceruloplasmin expression	IEA	Caenorhabditis elegans	6	0	0	0
Q9BL19	R-CEL-156827	http://www.reactome.org/PathwayBrowser/#/R-CEL-156827	L13a-mediated translational silencing of Ceruloplasmin expression	IEA	Caenorhabditis elegans	6	0	0	0
Q9N3X2	R-CEL-156827	http://www.reactome.org/PathwayBrowser/#/R-CEL-156827	L13a-mediated translational silencing of Ceruloplasmin expression	IEA	Caenorhabditis elegans	9	0	0	0
Q9N4I4	R-CEL-156827	http://www.reactome.org/PathwayBrowser/#/R-CEL-156827	L13a-mediated translational silencing of Ceruloplasmin expression	IEA	Caenorhabditis elegans	6	0	0	0
Q9NEN6	R-CEL-156827	http://www.reactome.org/PathwayBrowser/#/R-CEL-156827	L13a-mediated translational silencing of Ceruloplasmin expression	IEA	Caenorhabditis elegans	10	0	0	0
Q9TXP0	R-CEL-156827	http://www.reactome.org/PathwayBrowser/#/R-CEL-156827	L13a-mediated translational silencing of Ceruloplasmin expression	IEA	Caenorhabditis elegans	9	0	0	0
Q9TXU7	R-CEL-156827	http://www.reactome.org/PathwayBrowser/#/R-CEL-156827	L13a-mediated translational silencing of Ceruloplasmin expression	IEA	Caenorhabditis elegans	4	1	0	0
Q9U1X9	R-CEL-156827	http://www.reactome.org/PathwayBrowser/#/R-CEL-156827	L13a-mediated translational silencing of Ceruloplasmin expression	IEA	Caenorhabditis elegans	6	0	0	0
Q9U2A8	R-CEL-156827	http://www.reactome.org/PathwayBrowser/#/R-CEL-156827	L13a-mediated translational silencing of Ceruloplasmin expression	IEA	Caenorhabditis elegans	6	0	0	0
Q9U332	R-CEL-156827	http://www.reactome.org/PathwayBrowser/#/R-CEL-156827	L13a-mediated translational silencing of Ceruloplasmin expression	IEA	Caenorhabditis elegans	6	0	0	0
Q9XUP3	R-CEL-156827	http://www.reactome.org/PathwayBrowser/#/R-CEL-156827	L13a-mediated translational silencing of Ceruloplasmin expression	IEA	Caenorhabditis elegans	4	0	0	0
Q9XUT3	R-CEL-156827	http://www.reactome.org/PathwayBrowser/#/R-CEL-156827	L13a-mediated translational silencing of Ceruloplasmin expression	IEA	Caenorhabditis elegans	51	0	0	0
Q9XVE9	R-CEL-156827	http://www.reactome.org/PathwayBrowser/#/R-CEL-156827	L13a-mediated translational silencing of Ceruloplasmin expression	IEA	Caenorhabditis elegans	6	0	0	0
Q9XVF7	R-CEL-156827	http://www.reactome.org/PathwayBrowser/#/R-CEL-156827	L13a-mediated translational silencing of Ceruloplasmin expression	IEA	Caenorhabditis elegans	6	0	0	0
Q9XVP0	R-CEL-156827	http://www.reactome.org/PathwayBrowser/#/R-CEL-156827	L13a-mediated translational silencing of Ceruloplasmin expression	IEA	Caenorhabditis elegans	9	0	0	0
Q9XWI6	R-CEL-156827	http://www.reactome.org/PathwayBrowser/#/R-CEL-156827	L13a-mediated translational silencing of Ceruloplasmin expression	IEA	Caenorhabditis elegans	4	0	0	0
Q9XWS4	R-CEL-156827	http://www.reactome.org/PathwayBrowser/#/R-CEL-156827	L13a-mediated translational silencing of Ceruloplasmin expression	IEA	Caenorhabditis elegans	6	0	0	0
P34460	R-CEL-156842	http://www.reactome.org/PathwayBrowser/#/R-CEL-156842	Eukaryotic Translation Elongation	IEA	Caenorhabditis elegans	1	0	0	0
P53013	R-CEL-156842	http://www.reactome.org/PathwayBrowser/#/R-CEL-156842	Eukaryotic Translation Elongation	IEA	Caenorhabditis elegans	1	0	0	0
P54412	R-CEL-156842	http://www.reactome.org/PathwayBrowser/#/R-CEL-156842	Eukaryotic Translation Elongation	IEA	Caenorhabditis elegans	1	0	0	0
P29691	R-CEL-156902	http://www.reactome.org/PathwayBrowser/#/R-CEL-156902	Peptide chain elongation	IEA	Caenorhabditis elegans	2	0	0	0
Q9GYG4	R-CEL-15869	http://www.reactome.org/PathwayBrowser/#/R-CEL-15869	Metabolism of nucleotides	IEA	Caenorhabditis elegans	1	0	0	0
A5A8P6	R-CEL-159236	http://www.reactome.org/PathwayBrowser/#/R-CEL-159236	Transport of Mature mRNA derived from an Intron-Containing Transcript	IEA	Caenorhabditis elegans	4	0	0	0
C2BR94	R-CEL-159236	http://www.reactome.org/PathwayBrowser/#/R-CEL-159236	Transport of Mature mRNA derived from an Intron-Containing Transcript	IEA	Caenorhabditis elegans	3	0	0	0
D3YT70	R-CEL-159236	http://www.reactome.org/PathwayBrowser/#/R-CEL-159236	Transport of Mature mRNA derived from an Intron-Containing Transcript	IEA	Caenorhabditis elegans	3	0	0	0
G5EDE4	R-CEL-159236	http://www.reactome.org/PathwayBrowser/#/R-CEL-159236	Transport of Mature mRNA derived from an Intron-Containing Transcript	IEA	Caenorhabditis elegans	4	0	0	0
H2L0N5	R-CEL-159236	http://www.reactome.org/PathwayBrowser/#/R-CEL-159236	Transport of Mature mRNA derived from an Intron-Containing Transcript	IEA	Caenorhabditis elegans	3	0	0	0
O01159	R-CEL-159236	http://www.reactome.org/PathwayBrowser/#/R-CEL-159236	Transport of Mature mRNA derived from an Intron-Containing Transcript	IEA	Caenorhabditis elegans	4	0	0	0
O01763	R-CEL-159236	http://www.reactome.org/PathwayBrowser/#/R-CEL-159236	Transport of Mature mRNA derived from an Intron-Containing Transcript	IEA	Caenorhabditis elegans	14	0	0	0
O44729	R-CEL-159236	http://www.reactome.org/PathwayBrowser/#/R-CEL-159236	Transport of Mature mRNA derived from an Intron-Containing Transcript	IEA	Caenorhabditis elegans	4	0	0	0
O44781	R-CEL-159236	http://www.reactome.org/PathwayBrowser/#/R-CEL-159236	Transport of Mature mRNA derived from an Intron-Containing Transcript	IEA	Caenorhabditis elegans	6	0	0	0
O62185	R-CEL-159236	http://www.reactome.org/PathwayBrowser/#/R-CEL-159236	Transport of Mature mRNA derived from an Intron-Containing Transcript	IEA	Caenorhabditis elegans	4	0	0	0
P34498	R-CEL-159236	http://www.reactome.org/PathwayBrowser/#/R-CEL-159236	Transport of Mature mRNA derived from an Intron-Containing Transcript	IEA	Caenorhabditis elegans	4	0	0	0
P49029	R-CEL-159236	http://www.reactome.org/PathwayBrowser/#/R-CEL-159236	Transport of Mature mRNA derived from an Intron-Containing Transcript	IEA	Caenorhabditis elegans	5	0	0	0
P90978	R-CEL-159236	http://www.reactome.org/PathwayBrowser/#/R-CEL-159236	Transport of Mature mRNA derived from an Intron-Containing Transcript	IEA	Caenorhabditis elegans	4	0	0	0
P91867	R-CEL-159236	http://www.reactome.org/PathwayBrowser/#/R-CEL-159236	Transport of Mature mRNA derived from an Intron-Containing Transcript	IEA	Caenorhabditis elegans	3	0	0	0
Q09511	R-CEL-159236	http://www.reactome.org/PathwayBrowser/#/R-CEL-159236	Transport of Mature mRNA derived from an Intron-Containing Transcript	IEA	Caenorhabditis elegans	5	0	0	0
Q18033	R-CEL-159236	http://www.reactome.org/PathwayBrowser/#/R-CEL-159236	Transport of Mature mRNA derived from an Intron-Containing Transcript	IEA	Caenorhabditis elegans	3	0	0	0
Q18212	R-CEL-159236	http://www.reactome.org/PathwayBrowser/#/R-CEL-159236	Transport of Mature mRNA derived from an Intron-Containing Transcript	IEA	Caenorhabditis elegans	3	0	0	0
Q18409	R-CEL-159236	http://www.reactome.org/PathwayBrowser/#/R-CEL-159236	Transport of Mature mRNA derived from an Intron-Containing Transcript	IEA	Caenorhabditis elegans	5	0	0	0
Q20445	R-CEL-159236	http://www.reactome.org/PathwayBrowser/#/R-CEL-159236	Transport of Mature mRNA derived from an Intron-Containing Transcript	IEA	Caenorhabditis elegans	5	0	0	0
Q21155	R-CEL-159236	http://www.reactome.org/PathwayBrowser/#/R-CEL-159236	Transport of Mature mRNA derived from an Intron-Containing Transcript	IEA	Caenorhabditis elegans	5	0	0	0
Q21278	R-CEL-159236	http://www.reactome.org/PathwayBrowser/#/R-CEL-159236	Transport of Mature mRNA derived from an Intron-Containing Transcript	IEA	Caenorhabditis elegans	3	0	0	0
Q21832	R-CEL-159236	http://www.reactome.org/PathwayBrowser/#/R-CEL-159236	Transport of Mature mRNA derived from an Intron-Containing Transcript	IEA	Caenorhabditis elegans	5	0	0	0
Q23120	R-CEL-159236	http://www.reactome.org/PathwayBrowser/#/R-CEL-159236	Transport of Mature mRNA derived from an Intron-Containing Transcript	IEA	Caenorhabditis elegans	5	0	0	0
Q23121	R-CEL-159236	http://www.reactome.org/PathwayBrowser/#/R-CEL-159236	Transport of Mature mRNA derived from an Intron-Containing Transcript	IEA	Caenorhabditis elegans	5	0	0	0
Q8WQF3	R-CEL-159236	http://www.reactome.org/PathwayBrowser/#/R-CEL-159236	Transport of Mature mRNA derived from an Intron-Containing Transcript	IEA	Caenorhabditis elegans	5	0	0	0
Q93594	R-CEL-159236	http://www.reactome.org/PathwayBrowser/#/R-CEL-159236	Transport of Mature mRNA derived from an Intron-Containing Transcript	IEA	Caenorhabditis elegans	14	0	0	0
Q9BL61	R-CEL-159236	http://www.reactome.org/PathwayBrowser/#/R-CEL-159236	Transport of Mature mRNA derived from an Intron-Containing Transcript	IEA	Caenorhabditis elegans	6	0	0	0
Q9N5E3	R-CEL-159236	http://www.reactome.org/PathwayBrowser/#/R-CEL-159236	Transport of Mature mRNA derived from an Intron-Containing Transcript	IEA	Caenorhabditis elegans	3	0	0	0
Q9NEW6	R-CEL-159236	http://www.reactome.org/PathwayBrowser/#/R-CEL-159236	Transport of Mature mRNA derived from an Intron-Containing Transcript	IEA	Caenorhabditis elegans	5	0	0	0
Q9U2U0	R-CEL-159236	http://www.reactome.org/PathwayBrowser/#/R-CEL-159236	Transport of Mature mRNA derived from an Intron-Containing Transcript	IEA	Caenorhabditis elegans	4	0	0	0
Q9U3S3	R-CEL-159236	http://www.reactome.org/PathwayBrowser/#/R-CEL-159236	Transport of Mature mRNA derived from an Intron-Containing Transcript	IEA	Caenorhabditis elegans	3	0	0	0
Q9U757	R-CEL-159236	http://www.reactome.org/PathwayBrowser/#/R-CEL-159236	Transport of Mature mRNA derived from an Intron-Containing Transcript	IEA	Caenorhabditis elegans	1	0	0	0
Q9XVS7	R-CEL-159236	http://www.reactome.org/PathwayBrowser/#/R-CEL-159236	Transport of Mature mRNA derived from an Intron-Containing Transcript	IEA	Caenorhabditis elegans	1	0	0	0
Q9XVS8	R-CEL-159236	http://www.reactome.org/PathwayBrowser/#/R-CEL-159236	Transport of Mature mRNA derived from an Intron-Containing Transcript	IEA	Caenorhabditis elegans	1	0	0	0
V6CJF0	R-CEL-159236	http://www.reactome.org/PathwayBrowser/#/R-CEL-159236	Transport of Mature mRNA derived from an Intron-Containing Transcript	IEA	Caenorhabditis elegans	6	0	0	0
B3WFZ3	R-CEL-159418	http://www.reactome.org/PathwayBrowser/#/R-CEL-159418	Recycling of bile acids and salts	IEA	Caenorhabditis elegans	3	1	0	0
B3WFZ4	R-CEL-159418	http://www.reactome.org/PathwayBrowser/#/R-CEL-159418	Recycling of bile acids and salts	IEA	Caenorhabditis elegans	3	0	0	0
G5EDF9	R-CEL-159418	http://www.reactome.org/PathwayBrowser/#/R-CEL-159418	Recycling of bile acids and salts	IEA	Caenorhabditis elegans	3	0	0	0
O01862	R-CEL-159418	http://www.reactome.org/PathwayBrowser/#/R-CEL-159418	Recycling of bile acids and salts	IEA	Caenorhabditis elegans	3	1	0	0
O45003	R-CEL-159418	http://www.reactome.org/PathwayBrowser/#/R-CEL-159418	Recycling of bile acids and salts	IEA	Caenorhabditis elegans	3	1	0	0
Q9GYN3	R-CEL-159418	http://www.reactome.org/PathwayBrowser/#/R-CEL-159418	Recycling of bile acids and salts	IEA	Caenorhabditis elegans	3	0	0	0
A0A061ADY3	R-CEL-1614517	http://www.reactome.org/PathwayBrowser/#/R-CEL-1614517	Sulfide oxidation to sulfate	IEA	Caenorhabditis elegans	1	0	0	0
C6KRP5	R-CEL-1614517	http://www.reactome.org/PathwayBrowser/#/R-CEL-1614517	Sulfide oxidation to sulfate	IEA	Caenorhabditis elegans	1	0	0	0
C6KRP6	R-CEL-1614517	http://www.reactome.org/PathwayBrowser/#/R-CEL-1614517	Sulfide oxidation to sulfate	IEA	Caenorhabditis elegans	1	0	0	0
G5EE96	R-CEL-1614517	http://www.reactome.org/PathwayBrowser/#/R-CEL-1614517	Sulfide oxidation to sulfate	IEA	Caenorhabditis elegans	3	0	0	0
J7SF87	R-CEL-1614517	http://www.reactome.org/PathwayBrowser/#/R-CEL-1614517	Sulfide oxidation to sulfate	IEA	Caenorhabditis elegans	1	1	0	0
M1ZJU1	R-CEL-1614517	http://www.reactome.org/PathwayBrowser/#/R-CEL-1614517	Sulfide oxidation to sulfate	IEA	Caenorhabditis elegans	1	0	0	0
M1ZJZ0	R-CEL-1614517	http://www.reactome.org/PathwayBrowser/#/R-CEL-1614517	Sulfide oxidation to sulfate	IEA	Caenorhabditis elegans	1	0	0	0
O17636	R-CEL-1614517	http://www.reactome.org/PathwayBrowser/#/R-CEL-1614517	Sulfide oxidation to sulfate	IEA	Caenorhabditis elegans	1	0	0	0
O62133	R-CEL-1614517	http://www.reactome.org/PathwayBrowser/#/R-CEL-1614517	Sulfide oxidation to sulfate	IEA	Caenorhabditis elegans	1	1	0	0
Q564P9	R-CEL-1614517	http://www.reactome.org/PathwayBrowser/#/R-CEL-1614517	Sulfide oxidation to sulfate	IEA	Caenorhabditis elegans	1	0	0	0
Q9N2S1	R-CEL-1614517	http://www.reactome.org/PathwayBrowser/#/R-CEL-1614517	Sulfide oxidation to sulfate	IEA	Caenorhabditis elegans	1	0	0	0
Q9XTQ8	R-CEL-1614517	http://www.reactome.org/PathwayBrowser/#/R-CEL-1614517	Sulfide oxidation to sulfate	IEA	Caenorhabditis elegans	1	0	0	0
K8ESE2	R-CEL-1614558	http://www.reactome.org/PathwayBrowser/#/R-CEL-1614558	Degradation of cysteine and homocysteine	IEA	Caenorhabditis elegans	2	0	0	0
O45391	R-CEL-1614558	http://www.reactome.org/PathwayBrowser/#/R-CEL-1614558	Degradation of cysteine and homocysteine	IEA	Caenorhabditis elegans	2	0	0	0
P55216	R-CEL-1614558	http://www.reactome.org/PathwayBrowser/#/R-CEL-1614558	Degradation of cysteine and homocysteine	IEA	Caenorhabditis elegans	2	0	0	0
Q20893	R-CEL-1614558	http://www.reactome.org/PathwayBrowser/#/R-CEL-1614558	Degradation of cysteine and homocysteine	IEA	Caenorhabditis elegans	1	0	0	0
Q8IAA1	R-CEL-1614558	http://www.reactome.org/PathwayBrowser/#/R-CEL-1614558	Degradation of cysteine and homocysteine	IEA	Caenorhabditis elegans	1	0	0	0
G5EF21	R-CEL-1614603	http://www.reactome.org/PathwayBrowser/#/R-CEL-1614603	Cysteine formation from homocysteine	IEA	Caenorhabditis elegans	1	0	0	0
K8ESE2	R-CEL-1614603	http://www.reactome.org/PathwayBrowser/#/R-CEL-1614603	Cysteine formation from homocysteine	IEA	Caenorhabditis elegans	2	0	0	0
O45391	R-CEL-1614603	http://www.reactome.org/PathwayBrowser/#/R-CEL-1614603	Cysteine formation from homocysteine	IEA	Caenorhabditis elegans	2	0	0	0
P55216	R-CEL-1614603	http://www.reactome.org/PathwayBrowser/#/R-CEL-1614603	Cysteine formation from homocysteine	IEA	Caenorhabditis elegans	2	0	0	0
Q19374	R-CEL-1614603	http://www.reactome.org/PathwayBrowser/#/R-CEL-1614603	Cysteine formation from homocysteine	IEA	Caenorhabditis elegans	1	0	0	0
Q965I8	R-CEL-1614603	http://www.reactome.org/PathwayBrowser/#/R-CEL-1614603	Cysteine formation from homocysteine	IEA	Caenorhabditis elegans	1	0	0	0
A9CZN9	R-CEL-1614635	http://www.reactome.org/PathwayBrowser/#/R-CEL-1614635	Sulfur amino acid metabolism	IEA	Caenorhabditis elegans	2	0	0	0
O17680	R-CEL-1614635	http://www.reactome.org/PathwayBrowser/#/R-CEL-1614635	Sulfur amino acid metabolism	IEA	Caenorhabditis elegans	3	0	0	0
O18000	R-CEL-1614635	http://www.reactome.org/PathwayBrowser/#/R-CEL-1614635	Sulfur amino acid metabolism	IEA	Caenorhabditis elegans	2	0	0	0
P27604	R-CEL-1614635	http://www.reactome.org/PathwayBrowser/#/R-CEL-1614635	Sulfur amino acid metabolism	IEA	Caenorhabditis elegans	2	0	0	0
P50305	R-CEL-1614635	http://www.reactome.org/PathwayBrowser/#/R-CEL-1614635	Sulfur amino acid metabolism	IEA	Caenorhabditis elegans	3	0	0	0
Q09582	R-CEL-1614635	http://www.reactome.org/PathwayBrowser/#/R-CEL-1614635	Sulfur amino acid metabolism	IEA	Caenorhabditis elegans	3	0	0	0
Q17574	R-CEL-1614635	http://www.reactome.org/PathwayBrowser/#/R-CEL-1614635	Sulfur amino acid metabolism	IEA	Caenorhabditis elegans	3	0	0	0
Q20117	R-CEL-1614635	http://www.reactome.org/PathwayBrowser/#/R-CEL-1614635	Sulfur amino acid metabolism	IEA	Caenorhabditis elegans	2	0	0	0
Q27522	R-CEL-1614635	http://www.reactome.org/PathwayBrowser/#/R-CEL-1614635	Sulfur amino acid metabolism	IEA	Caenorhabditis elegans	3	0	0	0
Q966L2	R-CEL-1614635	http://www.reactome.org/PathwayBrowser/#/R-CEL-1614635	Sulfur amino acid metabolism	IEA	Caenorhabditis elegans	2	0	0	0
Q9BL46	R-CEL-1614635	http://www.reactome.org/PathwayBrowser/#/R-CEL-1614635	Sulfur amino acid metabolism	IEA	Caenorhabditis elegans	2	0	0	0
I7FW32	R-CEL-162658	http://www.reactome.org/PathwayBrowser/#/R-CEL-162658	Golgi Cisternae Pericentriolar Stack Reorganization	IEA	Caenorhabditis elegans	4	0	0	0
P34331	R-CEL-162658	http://www.reactome.org/PathwayBrowser/#/R-CEL-162658	Golgi Cisternae Pericentriolar Stack Reorganization	IEA	Caenorhabditis elegans	6	0	0	0
Q20845	R-CEL-162658	http://www.reactome.org/PathwayBrowser/#/R-CEL-162658	Golgi Cisternae Pericentriolar Stack Reorganization	IEA	Caenorhabditis elegans	6	0	0	0
Q94142	R-CEL-162658	http://www.reactome.org/PathwayBrowser/#/R-CEL-162658	Golgi Cisternae Pericentriolar Stack Reorganization	IEA	Caenorhabditis elegans	4	0	0	0
Q9N2L7	R-CEL-162658	http://www.reactome.org/PathwayBrowser/#/R-CEL-162658	Golgi Cisternae Pericentriolar Stack Reorganization	IEA	Caenorhabditis elegans	6	0	0	0
Q9N3Y1	R-CEL-162658	http://www.reactome.org/PathwayBrowser/#/R-CEL-162658	Golgi Cisternae Pericentriolar Stack Reorganization	IEA	Caenorhabditis elegans	2	0	0	0
Q9UAQ6	R-CEL-162658	http://www.reactome.org/PathwayBrowser/#/R-CEL-162658	Golgi Cisternae Pericentriolar Stack Reorganization	IEA	Caenorhabditis elegans	4	0	0	0
D4YWC2	R-CEL-162710	http://www.reactome.org/PathwayBrowser/#/R-CEL-162710	Synthesis of glycosylphosphatidylinositol (GPI)	IEA	Caenorhabditis elegans	1	0	0	0
D6RYD6	R-CEL-162710	http://www.reactome.org/PathwayBrowser/#/R-CEL-162710	Synthesis of glycosylphosphatidylinositol (GPI)	IEA	Caenorhabditis elegans	1	0	0	0
D6RYD7	R-CEL-162710	http://www.reactome.org/PathwayBrowser/#/R-CEL-162710	Synthesis of glycosylphosphatidylinositol (GPI)	IEA	Caenorhabditis elegans	1	0	0	0
G4SNP0	R-CEL-162710	http://www.reactome.org/PathwayBrowser/#/R-CEL-162710	Synthesis of glycosylphosphatidylinositol (GPI)	IEA	Caenorhabditis elegans	1	0	0	0
G5EDN2	R-CEL-162710	http://www.reactome.org/PathwayBrowser/#/R-CEL-162710	Synthesis of glycosylphosphatidylinositol (GPI)	IEA	Caenorhabditis elegans	1	0	0	0
O02164	R-CEL-162710	http://www.reactome.org/PathwayBrowser/#/R-CEL-162710	Synthesis of glycosylphosphatidylinositol (GPI)	IEA	Caenorhabditis elegans	1	0	0	0
Q9N3C5	R-CEL-162710	http://www.reactome.org/PathwayBrowser/#/R-CEL-162710	Synthesis of glycosylphosphatidylinositol (GPI)	IEA	Caenorhabditis elegans	1	0	0	0
E9P864	R-CEL-1632852	http://www.reactome.org/PathwayBrowser/#/R-CEL-1632852	Macroautophagy	IEA	Caenorhabditis elegans	8	0	0	0
G5EBK4	R-CEL-1632852	http://www.reactome.org/PathwayBrowser/#/R-CEL-1632852	Macroautophagy	IEA	Caenorhabditis elegans	2	0	0	0
H2KYN5	R-CEL-1632852	http://www.reactome.org/PathwayBrowser/#/R-CEL-1632852	Macroautophagy	IEA	Caenorhabditis elegans	1	0	0	0
H2L0M4	R-CEL-1632852	http://www.reactome.org/PathwayBrowser/#/R-CEL-1632852	Macroautophagy	IEA	Caenorhabditis elegans	1	0	0	0
H2L0S0	R-CEL-1632852	http://www.reactome.org/PathwayBrowser/#/R-CEL-1632852	Macroautophagy	IEA	Caenorhabditis elegans	1	0	0	0
K8ESC5	R-CEL-1632852	http://www.reactome.org/PathwayBrowser/#/R-CEL-1632852	Macroautophagy	IEA	Caenorhabditis elegans	1	0	0	0
O02208	R-CEL-1632852	http://www.reactome.org/PathwayBrowser/#/R-CEL-1632852	Macroautophagy	IEA	Caenorhabditis elegans	2	0	0	0
O16466	R-CEL-1632852	http://www.reactome.org/PathwayBrowser/#/R-CEL-1632852	Macroautophagy	IEA	Caenorhabditis elegans	1	0	0	0
P34379	R-CEL-1632852	http://www.reactome.org/PathwayBrowser/#/R-CEL-1632852	Macroautophagy	IEA	Caenorhabditis elegans	1	0	0	0
P45894	R-CEL-1632852	http://www.reactome.org/PathwayBrowser/#/R-CEL-1632852	Macroautophagy	IEA	Caenorhabditis elegans	4	0	0	0
Q09406	R-CEL-1632852	http://www.reactome.org/PathwayBrowser/#/R-CEL-1632852	Macroautophagy	IEA	Caenorhabditis elegans	1	0	0	0
Q09490	R-CEL-1632852	http://www.reactome.org/PathwayBrowser/#/R-CEL-1632852	Macroautophagy	IEA	Caenorhabditis elegans	1	0	0	0
Q10931	R-CEL-1632852	http://www.reactome.org/PathwayBrowser/#/R-CEL-1632852	Macroautophagy	IEA	Caenorhabditis elegans	2	0	0	0
Q18886	R-CEL-1632852	http://www.reactome.org/PathwayBrowser/#/R-CEL-1632852	Macroautophagy	IEA	Caenorhabditis elegans	2	0	0	0
Q18991	R-CEL-1632852	http://www.reactome.org/PathwayBrowser/#/R-CEL-1632852	Macroautophagy	IEA	Caenorhabditis elegans	1	0	0	0
Q19124	R-CEL-1632852	http://www.reactome.org/PathwayBrowser/#/R-CEL-1632852	Macroautophagy	IEA	Caenorhabditis elegans	1	0	0	0
Q22342	R-CEL-1632852	http://www.reactome.org/PathwayBrowser/#/R-CEL-1632852	Macroautophagy	IEA	Caenorhabditis elegans	1	0	0	0
Q22592	R-CEL-1632852	http://www.reactome.org/PathwayBrowser/#/R-CEL-1632852	Macroautophagy	IEA	Caenorhabditis elegans	1	0	0	0
Q22718	R-CEL-1632852	http://www.reactome.org/PathwayBrowser/#/R-CEL-1632852	Macroautophagy	IEA	Caenorhabditis elegans	2	0	0	0
Q22916	R-CEL-1632852	http://www.reactome.org/PathwayBrowser/#/R-CEL-1632852	Macroautophagy	IEA	Caenorhabditis elegans	2	0	0	0
Q23023	R-CEL-1632852	http://www.reactome.org/PathwayBrowser/#/R-CEL-1632852	Macroautophagy	IEA	Caenorhabditis elegans	1	0	0	0
Q23536	R-CEL-1632852	http://www.reactome.org/PathwayBrowser/#/R-CEL-1632852	Macroautophagy	IEA	Caenorhabditis elegans	2	0	0	0
Q23669	R-CEL-1632852	http://www.reactome.org/PathwayBrowser/#/R-CEL-1632852	Macroautophagy	IEA	Caenorhabditis elegans	8	0	0	0
Q3T903	R-CEL-1632852	http://www.reactome.org/PathwayBrowser/#/R-CEL-1632852	Macroautophagy	IEA	Caenorhabditis elegans	1	0	0	0
Q3V5I7	R-CEL-1632852	http://www.reactome.org/PathwayBrowser/#/R-CEL-1632852	Macroautophagy	IEA	Caenorhabditis elegans	2	0	0	0
Q3V5I8	R-CEL-1632852	http://www.reactome.org/PathwayBrowser/#/R-CEL-1632852	Macroautophagy	IEA	Caenorhabditis elegans	2	0	0	0
Q5TYK9	R-CEL-1632852	http://www.reactome.org/PathwayBrowser/#/R-CEL-1632852	Macroautophagy	IEA	Caenorhabditis elegans	8	0	0	0
Q86DD3	R-CEL-1632852	http://www.reactome.org/PathwayBrowser/#/R-CEL-1632852	Macroautophagy	IEA	Caenorhabditis elegans	1	0	0	0
Q95XH2	R-CEL-1632852	http://www.reactome.org/PathwayBrowser/#/R-CEL-1632852	Macroautophagy	IEA	Caenorhabditis elegans	1	0	0	0
Q95ZQ4	R-CEL-1632852	http://www.reactome.org/PathwayBrowser/#/R-CEL-1632852	Macroautophagy	IEA	Caenorhabditis elegans	4	0	0	0
Q9BHL6	R-CEL-1632852	http://www.reactome.org/PathwayBrowser/#/R-CEL-1632852	Macroautophagy	IEA	Caenorhabditis elegans	4	0	0	0
Q9BL60	R-CEL-1632852	http://www.reactome.org/PathwayBrowser/#/R-CEL-1632852	Macroautophagy	IEA	Caenorhabditis elegans	2	0	0	0
Q9GYK4	R-CEL-1632852	http://www.reactome.org/PathwayBrowser/#/R-CEL-1632852	Macroautophagy	IEA	Caenorhabditis elegans	2	0	0	0
Q9N369	R-CEL-1632852	http://www.reactome.org/PathwayBrowser/#/R-CEL-1632852	Macroautophagy	IEA	Caenorhabditis elegans	1	0	0	0
Q9NA30	R-CEL-1632852	http://www.reactome.org/PathwayBrowser/#/R-CEL-1632852	Macroautophagy	IEA	Caenorhabditis elegans	1	0	0	0
Q9NAH7	R-CEL-1632852	http://www.reactome.org/PathwayBrowser/#/R-CEL-1632852	Macroautophagy	IEA	Caenorhabditis elegans	4	0	0	0
Q9TXI6	R-CEL-1632852	http://www.reactome.org/PathwayBrowser/#/R-CEL-1632852	Macroautophagy	IEA	Caenorhabditis elegans	8	0	0	0
Q9TXI7	R-CEL-1632852	http://www.reactome.org/PathwayBrowser/#/R-CEL-1632852	Macroautophagy	IEA	Caenorhabditis elegans	8	0	0	0
Q9TXN6	R-CEL-1632852	http://www.reactome.org/PathwayBrowser/#/R-CEL-1632852	Macroautophagy	IEA	Caenorhabditis elegans	1	0	0	0
Q9U2F6	R-CEL-1632852	http://www.reactome.org/PathwayBrowser/#/R-CEL-1632852	Macroautophagy	IEA	Caenorhabditis elegans	3	0	0	0
Q9XUY2	R-CEL-1632852	http://www.reactome.org/PathwayBrowser/#/R-CEL-1632852	Macroautophagy	IEA	Caenorhabditis elegans	4	0	0	0
Q9XZR0	R-CEL-1632852	http://www.reactome.org/PathwayBrowser/#/R-CEL-1632852	Macroautophagy	IEA	Caenorhabditis elegans	8	0	0	0
U4PRD2	R-CEL-1632852	http://www.reactome.org/PathwayBrowser/#/R-CEL-1632852	Macroautophagy	IEA	Caenorhabditis elegans	1	0	0	0
V6CL88	R-CEL-1632852	http://www.reactome.org/PathwayBrowser/#/R-CEL-1632852	Macroautophagy	IEA	Caenorhabditis elegans	1	0	0	0
W6RR39	R-CEL-1632852	http://www.reactome.org/PathwayBrowser/#/R-CEL-1632852	Macroautophagy	IEA	Caenorhabditis elegans	2	0	0	0
P41846	R-CEL-163358	http://www.reactome.org/PathwayBrowser/#/R-CEL-163358	PKA-mediated phosphorylation of key metabolic factors	IEA	Caenorhabditis elegans	1	0	0	0
G5EF72	R-CEL-163359	http://www.reactome.org/PathwayBrowser/#/R-CEL-163359	Glucagon signaling in metabolic regulation	IEA	Caenorhabditis elegans	7	0	0	0
O16880	R-CEL-163359	http://www.reactome.org/PathwayBrowser/#/R-CEL-163359	Glucagon signaling in metabolic regulation	IEA	Caenorhabditis elegans	10	0	0	0
Q19523	R-CEL-163359	http://www.reactome.org/PathwayBrowser/#/R-CEL-163359	Glucagon signaling in metabolic regulation	IEA	Caenorhabditis elegans	10	0	0	0
Q7KPV0	R-CEL-163359	http://www.reactome.org/PathwayBrowser/#/R-CEL-163359	Glucagon signaling in metabolic regulation	IEA	Caenorhabditis elegans	7	0	0	0
V6CL61	R-CEL-163359	http://www.reactome.org/PathwayBrowser/#/R-CEL-163359	Glucagon signaling in metabolic regulation	IEA	Caenorhabditis elegans	7	0	0	0
O01812	R-CEL-163560	http://www.reactome.org/PathwayBrowser/#/R-CEL-163560	Hormone-sensitive lipase (HSL)-mediated triacylglycerol hydrolysis	IEA	Caenorhabditis elegans	5	0	0	0
O01814	R-CEL-163560	http://www.reactome.org/PathwayBrowser/#/R-CEL-163560	Hormone-sensitive lipase (HSL)-mediated triacylglycerol hydrolysis	IEA	Caenorhabditis elegans	5	0	0	0
O02323	R-CEL-163560	http://www.reactome.org/PathwayBrowser/#/R-CEL-163560	Hormone-sensitive lipase (HSL)-mediated triacylglycerol hydrolysis	IEA	Caenorhabditis elegans	5	0	0	0
O02324	R-CEL-163560	http://www.reactome.org/PathwayBrowser/#/R-CEL-163560	Hormone-sensitive lipase (HSL)-mediated triacylglycerol hydrolysis	IEA	Caenorhabditis elegans	5	0	0	0
Q965W1	R-CEL-163560	http://www.reactome.org/PathwayBrowser/#/R-CEL-163560	Hormone-sensitive lipase (HSL)-mediated triacylglycerol hydrolysis	IEA	Caenorhabditis elegans	5	0	0	0
O16880	R-CEL-163615	http://www.reactome.org/PathwayBrowser/#/R-CEL-163615	PKA activation	IEA	Caenorhabditis elegans	10	0	0	0
O16880	R-CEL-163615	http://www.reactome.org/PathwayBrowser/#/R-CEL-163615	PKA activation	IEA	Caenorhabditis elegans	10	0	0	0
P21137	R-CEL-163615	http://www.reactome.org/PathwayBrowser/#/R-CEL-163615	PKA activation	IEA	Caenorhabditis elegans	11	0	0	0
P21137	R-CEL-163615	http://www.reactome.org/PathwayBrowser/#/R-CEL-163615	PKA activation	IEA	Caenorhabditis elegans	11	0	0	0
P30625	R-CEL-163615	http://www.reactome.org/PathwayBrowser/#/R-CEL-163615	PKA activation	IEA	Caenorhabditis elegans	7	0	0	0
P30625	R-CEL-163615	http://www.reactome.org/PathwayBrowser/#/R-CEL-163615	PKA activation	IEA	Caenorhabditis elegans	7	0	0	0
Q19523	R-CEL-163615	http://www.reactome.org/PathwayBrowser/#/R-CEL-163615	PKA activation	IEA	Caenorhabditis elegans	10	0	0	0
Q19523	R-CEL-163615	http://www.reactome.org/PathwayBrowser/#/R-CEL-163615	PKA activation	IEA	Caenorhabditis elegans	10	0	0	0
P45894	R-CEL-163680	http://www.reactome.org/PathwayBrowser/#/R-CEL-163680	AMPK inhibits chREBP transcriptional activation activity	IEA	Caenorhabditis elegans	4	0	0	0
Q95ZQ4	R-CEL-163680	http://www.reactome.org/PathwayBrowser/#/R-CEL-163680	AMPK inhibits chREBP transcriptional activation activity	IEA	Caenorhabditis elegans	4	0	0	0
Q9BHL6	R-CEL-163680	http://www.reactome.org/PathwayBrowser/#/R-CEL-163680	AMPK inhibits chREBP transcriptional activation activity	IEA	Caenorhabditis elegans	4	0	0	0
Q9NAH7	R-CEL-163680	http://www.reactome.org/PathwayBrowser/#/R-CEL-163680	AMPK inhibits chREBP transcriptional activation activity	IEA	Caenorhabditis elegans	4	0	0	0
Q9XUY2	R-CEL-163680	http://www.reactome.org/PathwayBrowser/#/R-CEL-163680	AMPK inhibits chREBP transcriptional activation activity	IEA	Caenorhabditis elegans	4	0	0	0
O17759	R-CEL-163754	http://www.reactome.org/PathwayBrowser/#/R-CEL-163754	Insulin effects increased synthesis of Xylulose-5-Phosphate	IEA	Caenorhabditis elegans	2	0	0	0
Q8T876	R-CEL-163754	http://www.reactome.org/PathwayBrowser/#/R-CEL-163754	Insulin effects increased synthesis of Xylulose-5-Phosphate	IEA	Caenorhabditis elegans	2	0	0	0
Q966C7	R-CEL-163754	http://www.reactome.org/PathwayBrowser/#/R-CEL-163754	Insulin effects increased synthesis of Xylulose-5-Phosphate	IEA	Caenorhabditis elegans	2	0	0	0
P53585	R-CEL-163765	http://www.reactome.org/PathwayBrowser/#/R-CEL-163765	ChREBP activates metabolic gene expression	IEA	Caenorhabditis elegans	2	0	0	0
P90731	R-CEL-163765	http://www.reactome.org/PathwayBrowser/#/R-CEL-163765	ChREBP activates metabolic gene expression	IEA	Caenorhabditis elegans	2	0	0	0
P91866	R-CEL-163765	http://www.reactome.org/PathwayBrowser/#/R-CEL-163765	ChREBP activates metabolic gene expression	IEA	Caenorhabditis elegans	4	0	0	0
P91871	R-CEL-163765	http://www.reactome.org/PathwayBrowser/#/R-CEL-163765	ChREBP activates metabolic gene expression	IEA	Caenorhabditis elegans	4	0	0	0
Q22267	R-CEL-163765	http://www.reactome.org/PathwayBrowser/#/R-CEL-163765	ChREBP activates metabolic gene expression	IEA	Caenorhabditis elegans	3	0	0	0
P91266	R-CEL-163841	http://www.reactome.org/PathwayBrowser/#/R-CEL-163841	Gamma carboxylation, hypusine formation and arylsulfatase activation	IEA	Caenorhabditis elegans	1	0	0	0
P91402	R-CEL-163841	http://www.reactome.org/PathwayBrowser/#/R-CEL-163841	Gamma carboxylation, hypusine formation and arylsulfatase activation	IEA	Caenorhabditis elegans	1	0	0	0
Q9U2U7	R-CEL-163841	http://www.reactome.org/PathwayBrowser/#/R-CEL-163841	Gamma carboxylation, hypusine formation and arylsulfatase activation	IEA	Caenorhabditis elegans	1	0	0	0
G5EF72	R-CEL-164378	http://www.reactome.org/PathwayBrowser/#/R-CEL-164378	PKA activation in glucagon signalling	IEA	Caenorhabditis elegans	7	0	0	0
O16880	R-CEL-164378	http://www.reactome.org/PathwayBrowser/#/R-CEL-164378	PKA activation in glucagon signalling	IEA	Caenorhabditis elegans	10	0	0	0
P21137	R-CEL-164378	http://www.reactome.org/PathwayBrowser/#/R-CEL-164378	PKA activation in glucagon signalling	IEA	Caenorhabditis elegans	11	0	0	0
P30625	R-CEL-164378	http://www.reactome.org/PathwayBrowser/#/R-CEL-164378	PKA activation in glucagon signalling	IEA	Caenorhabditis elegans	7	0	0	0
Q19523	R-CEL-164378	http://www.reactome.org/PathwayBrowser/#/R-CEL-164378	PKA activation in glucagon signalling	IEA	Caenorhabditis elegans	10	0	0	0
Q7KPV0	R-CEL-164378	http://www.reactome.org/PathwayBrowser/#/R-CEL-164378	PKA activation in glucagon signalling	IEA	Caenorhabditis elegans	7	0	0	0
V6CL61	R-CEL-164378	http://www.reactome.org/PathwayBrowser/#/R-CEL-164378	PKA activation in glucagon signalling	IEA	Caenorhabditis elegans	7	0	0	0
G5EDQ4	R-CEL-1650814	http://www.reactome.org/PathwayBrowser/#/R-CEL-1650814	Collagen biosynthesis and modifying enzymes	IEA	Caenorhabditis elegans	3	0	0	0
G5EDV5	R-CEL-1650814	http://www.reactome.org/PathwayBrowser/#/R-CEL-1650814	Collagen biosynthesis and modifying enzymes	IEA	Caenorhabditis elegans	3	0	0	0
G5EF89	R-CEL-1650814	http://www.reactome.org/PathwayBrowser/#/R-CEL-1650814	Collagen biosynthesis and modifying enzymes	IEA	Caenorhabditis elegans	3	0	0	0
G5EFQ9	R-CEL-1650814	http://www.reactome.org/PathwayBrowser/#/R-CEL-1650814	Collagen biosynthesis and modifying enzymes	IEA	Caenorhabditis elegans	2	0	0	0
G5EGA4	R-CEL-1650814	http://www.reactome.org/PathwayBrowser/#/R-CEL-1650814	Collagen biosynthesis and modifying enzymes	IEA	Caenorhabditis elegans	3	0	0	0
O76368	R-CEL-1650814	http://www.reactome.org/PathwayBrowser/#/R-CEL-1650814	Collagen biosynthesis and modifying enzymes	IEA	Caenorhabditis elegans	2	0	0	0
P17139	R-CEL-1650814	http://www.reactome.org/PathwayBrowser/#/R-CEL-1650814	Collagen biosynthesis and modifying enzymes	IEA	Caenorhabditis elegans	2	0	0	0
P17140	R-CEL-1650814	http://www.reactome.org/PathwayBrowser/#/R-CEL-1650814	Collagen biosynthesis and modifying enzymes	IEA	Caenorhabditis elegans	2	0	0	0
P34576	R-CEL-1650814	http://www.reactome.org/PathwayBrowser/#/R-CEL-1650814	Collagen biosynthesis and modifying enzymes	IEA	Caenorhabditis elegans	1	0	0	0
Q17770	R-CEL-1650814	http://www.reactome.org/PathwayBrowser/#/R-CEL-1650814	Collagen biosynthesis and modifying enzymes	IEA	Caenorhabditis elegans	1	0	0	0
Q18989	R-CEL-1650814	http://www.reactome.org/PathwayBrowser/#/R-CEL-1650814	Collagen biosynthesis and modifying enzymes	IEA	Caenorhabditis elegans	1	0	0	0
Q20679	R-CEL-1650814	http://www.reactome.org/PathwayBrowser/#/R-CEL-1650814	Collagen biosynthesis and modifying enzymes	IEA	Caenorhabditis elegans	1	0	0	0
Q21281	R-CEL-1650814	http://www.reactome.org/PathwayBrowser/#/R-CEL-1650814	Collagen biosynthesis and modifying enzymes	IEA	Caenorhabditis elegans	1	0	0	0
Q9U9K7	R-CEL-1650814	http://www.reactome.org/PathwayBrowser/#/R-CEL-1650814	Collagen biosynthesis and modifying enzymes	IEA	Caenorhabditis elegans	3	0	0	0
G5EED4	R-CEL-165158	http://www.reactome.org/PathwayBrowser/#/R-CEL-165158	Activation of AKT2	IEA	Caenorhabditis elegans	3	1	0	0
G5EED4	R-CEL-165158	http://www.reactome.org/PathwayBrowser/#/R-CEL-165158	Activation of AKT2	IEA	Caenorhabditis elegans	3	1	0	0
Q17941	R-CEL-165158	http://www.reactome.org/PathwayBrowser/#/R-CEL-165158	Activation of AKT2	IEA	Caenorhabditis elegans	18	0	0	0
Q17941	R-CEL-165158	http://www.reactome.org/PathwayBrowser/#/R-CEL-165158	Activation of AKT2	IEA	Caenorhabditis elegans	18	0	0	0
Q9XTG7	R-CEL-165158	http://www.reactome.org/PathwayBrowser/#/R-CEL-165158	Activation of AKT2	IEA	Caenorhabditis elegans	18	0	0	0
Q9XTG7	R-CEL-165158	http://www.reactome.org/PathwayBrowser/#/R-CEL-165158	Activation of AKT2	IEA	Caenorhabditis elegans	18	0	0	0
Q9Y1J3	R-CEL-165158	http://www.reactome.org/PathwayBrowser/#/R-CEL-165158	Activation of AKT2	IEA	Caenorhabditis elegans	15	0	0	0
Q9Y1J3	R-CEL-165158	http://www.reactome.org/PathwayBrowser/#/R-CEL-165158	Activation of AKT2	IEA	Caenorhabditis elegans	15	0	0	0
A0A061ACG4	R-CEL-165159	http://www.reactome.org/PathwayBrowser/#/R-CEL-165159	mTOR signalling	IEA	Caenorhabditis elegans	1	0	0	0
G5EGB3	R-CEL-165159	http://www.reactome.org/PathwayBrowser/#/R-CEL-165159	mTOR signalling	IEA	Caenorhabditis elegans	1	0	0	0
P34443	R-CEL-165159	http://www.reactome.org/PathwayBrowser/#/R-CEL-165159	mTOR signalling	IEA	Caenorhabditis elegans	1	0	0	0
Q22743	R-CEL-165159	http://www.reactome.org/PathwayBrowser/#/R-CEL-165159	mTOR signalling	IEA	Caenorhabditis elegans	1	0	0	0
Q8I0P7	R-CEL-165160	http://www.reactome.org/PathwayBrowser/#/R-CEL-165160	PDE3B signalling	IEA	Caenorhabditis elegans	4	0	0	0
Q8I0P7	R-CEL-165160	http://www.reactome.org/PathwayBrowser/#/R-CEL-165160	PDE3B signalling	IEA	Caenorhabditis elegans	4	0	0	0
O17915	R-CEL-1655829	http://www.reactome.org/PathwayBrowser/#/R-CEL-1655829	Regulation of cholesterol biosynthesis by SREBP (SREBF)	IEA	Caenorhabditis elegans	1	0	0	0
Q9BIB8	R-CEL-1655829	http://www.reactome.org/PathwayBrowser/#/R-CEL-1655829	Regulation of cholesterol biosynthesis by SREBP (SREBF)	IEA	Caenorhabditis elegans	1	0	0	0
Q9U227	R-CEL-1655829	http://www.reactome.org/PathwayBrowser/#/R-CEL-1655829	Regulation of cholesterol biosynthesis by SREBP (SREBF)	IEA	Caenorhabditis elegans	1	0	0	0
Q9XX00	R-CEL-1655829	http://www.reactome.org/PathwayBrowser/#/R-CEL-1655829	Regulation of cholesterol biosynthesis by SREBP (SREBF)	IEA	Caenorhabditis elegans	2	0	0	0
B3CJ53	R-CEL-1660499	http://www.reactome.org/PathwayBrowser/#/R-CEL-1660499	Synthesis of PIPs at the plasma membrane	IEA	Caenorhabditis elegans	3	0	0	0
G5EBF2	R-CEL-1660499	http://www.reactome.org/PathwayBrowser/#/R-CEL-1660499	Synthesis of PIPs at the plasma membrane	IEA	Caenorhabditis elegans	2	0	0	0
G5ECL2	R-CEL-1660499	http://www.reactome.org/PathwayBrowser/#/R-CEL-1660499	Synthesis of PIPs at the plasma membrane	IEA	Caenorhabditis elegans	3	0	0	0
G5ED68	R-CEL-1660499	http://www.reactome.org/PathwayBrowser/#/R-CEL-1660499	Synthesis of PIPs at the plasma membrane	IEA	Caenorhabditis elegans	2	0	0	0
G5EDR8	R-CEL-1660499	http://www.reactome.org/PathwayBrowser/#/R-CEL-1660499	Synthesis of PIPs at the plasma membrane	IEA	Caenorhabditis elegans	3	0	0	0
G5EDY0	R-CEL-1660499	http://www.reactome.org/PathwayBrowser/#/R-CEL-1660499	Synthesis of PIPs at the plasma membrane	IEA	Caenorhabditis elegans	4	0	0	0
G5EE01	R-CEL-1660499	http://www.reactome.org/PathwayBrowser/#/R-CEL-1660499	Synthesis of PIPs at the plasma membrane	IEA	Caenorhabditis elegans	4	0	0	0
G5EEJ9	R-CEL-1660499	http://www.reactome.org/PathwayBrowser/#/R-CEL-1660499	Synthesis of PIPs at the plasma membrane	IEA	Caenorhabditis elegans	3	0	0	0
H2L2D3	R-CEL-1660499	http://www.reactome.org/PathwayBrowser/#/R-CEL-1660499	Synthesis of PIPs at the plasma membrane	IEA	Caenorhabditis elegans	4	0	0	0
O01759	R-CEL-1660499	http://www.reactome.org/PathwayBrowser/#/R-CEL-1660499	Synthesis of PIPs at the plasma membrane	IEA	Caenorhabditis elegans	3	0	0	0
O45318	R-CEL-1660499	http://www.reactome.org/PathwayBrowser/#/R-CEL-1660499	Synthesis of PIPs at the plasma membrane	IEA	Caenorhabditis elegans	4	0	0	0
P34370	R-CEL-1660499	http://www.reactome.org/PathwayBrowser/#/R-CEL-1660499	Synthesis of PIPs at the plasma membrane	IEA	Caenorhabditis elegans	3	1	0	0
Q21623	R-CEL-1660499	http://www.reactome.org/PathwayBrowser/#/R-CEL-1660499	Synthesis of PIPs at the plasma membrane	IEA	Caenorhabditis elegans	3	0	0	0
Q23083	R-CEL-1660499	http://www.reactome.org/PathwayBrowser/#/R-CEL-1660499	Synthesis of PIPs at the plasma membrane	IEA	Caenorhabditis elegans	4	0	0	0
Q69Z15	R-CEL-1660499	http://www.reactome.org/PathwayBrowser/#/R-CEL-1660499	Synthesis of PIPs at the plasma membrane	IEA	Caenorhabditis elegans	2	0	0	0
Q8MUM1	R-CEL-1660499	http://www.reactome.org/PathwayBrowser/#/R-CEL-1660499	Synthesis of PIPs at the plasma membrane	IEA	Caenorhabditis elegans	3	0	0	0
Q9BL73	R-CEL-1660499	http://www.reactome.org/PathwayBrowser/#/R-CEL-1660499	Synthesis of PIPs at the plasma membrane	IEA	Caenorhabditis elegans	2	0	0	0
Q9N589	R-CEL-1660499	http://www.reactome.org/PathwayBrowser/#/R-CEL-1660499	Synthesis of PIPs at the plasma membrane	IEA	Caenorhabditis elegans	3	0	0	0
A5Z2U3	R-CEL-1660514	http://www.reactome.org/PathwayBrowser/#/R-CEL-1660514	Synthesis of PIPs at the Golgi membrane	IEA	Caenorhabditis elegans	4	0	0	0
E9P864	R-CEL-1660514	http://www.reactome.org/PathwayBrowser/#/R-CEL-1660514	Synthesis of PIPs at the Golgi membrane	IEA	Caenorhabditis elegans	8	0	0	0
G5EBY9	R-CEL-1660514	http://www.reactome.org/PathwayBrowser/#/R-CEL-1660514	Synthesis of PIPs at the Golgi membrane	IEA	Caenorhabditis elegans	2	0	0	0
G5EDY0	R-CEL-1660514	http://www.reactome.org/PathwayBrowser/#/R-CEL-1660514	Synthesis of PIPs at the Golgi membrane	IEA	Caenorhabditis elegans	4	0	0	0
G5EGN9	R-CEL-1660514	http://www.reactome.org/PathwayBrowser/#/R-CEL-1660514	Synthesis of PIPs at the Golgi membrane	IEA	Caenorhabditis elegans	2	0	0	0
H2L2D3	R-CEL-1660514	http://www.reactome.org/PathwayBrowser/#/R-CEL-1660514	Synthesis of PIPs at the Golgi membrane	IEA	Caenorhabditis elegans	4	0	0	0
N1NTE2	R-CEL-1660514	http://www.reactome.org/PathwayBrowser/#/R-CEL-1660514	Synthesis of PIPs at the Golgi membrane	IEA	Caenorhabditis elegans	2	0	0	0
O17590	R-CEL-1660514	http://www.reactome.org/PathwayBrowser/#/R-CEL-1660514	Synthesis of PIPs at the Golgi membrane	IEA	Caenorhabditis elegans	4	0	0	0
O45318	R-CEL-1660514	http://www.reactome.org/PathwayBrowser/#/R-CEL-1660514	Synthesis of PIPs at the Golgi membrane	IEA	Caenorhabditis elegans	4	0	0	0
Q10943	R-CEL-1660514	http://www.reactome.org/PathwayBrowser/#/R-CEL-1660514	Synthesis of PIPs at the Golgi membrane	IEA	Caenorhabditis elegans	3	0	0	0
Q20077	R-CEL-1660514	http://www.reactome.org/PathwayBrowser/#/R-CEL-1660514	Synthesis of PIPs at the Golgi membrane	IEA	Caenorhabditis elegans	1	0	0	0
Q23083	R-CEL-1660514	http://www.reactome.org/PathwayBrowser/#/R-CEL-1660514	Synthesis of PIPs at the Golgi membrane	IEA	Caenorhabditis elegans	4	0	0	0
Q23669	R-CEL-1660514	http://www.reactome.org/PathwayBrowser/#/R-CEL-1660514	Synthesis of PIPs at the Golgi membrane	IEA	Caenorhabditis elegans	8	0	0	0
Q5TYK9	R-CEL-1660514	http://www.reactome.org/PathwayBrowser/#/R-CEL-1660514	Synthesis of PIPs at the Golgi membrane	IEA	Caenorhabditis elegans	8	0	0	0
Q93641	R-CEL-1660514	http://www.reactome.org/PathwayBrowser/#/R-CEL-1660514	Synthesis of PIPs at the Golgi membrane	IEA	Caenorhabditis elegans	2	0	0	0
Q9TXI6	R-CEL-1660514	http://www.reactome.org/PathwayBrowser/#/R-CEL-1660514	Synthesis of PIPs at the Golgi membrane	IEA	Caenorhabditis elegans	8	0	0	0
Q9TXI7	R-CEL-1660514	http://www.reactome.org/PathwayBrowser/#/R-CEL-1660514	Synthesis of PIPs at the Golgi membrane	IEA	Caenorhabditis elegans	8	0	0	0
Q9XZR0	R-CEL-1660514	http://www.reactome.org/PathwayBrowser/#/R-CEL-1660514	Synthesis of PIPs at the Golgi membrane	IEA	Caenorhabditis elegans	8	0	0	0
E3W752	R-CEL-1660516	http://www.reactome.org/PathwayBrowser/#/R-CEL-1660516	Synthesis of PIPs at the early endosome membrane	IEA	Caenorhabditis elegans	1	0	0	0
E3W753	R-CEL-1660516	http://www.reactome.org/PathwayBrowser/#/R-CEL-1660516	Synthesis of PIPs at the early endosome membrane	IEA	Caenorhabditis elegans	1	0	0	0
E9P864	R-CEL-1660516	http://www.reactome.org/PathwayBrowser/#/R-CEL-1660516	Synthesis of PIPs at the early endosome membrane	IEA	Caenorhabditis elegans	8	0	0	0
G5EDY0	R-CEL-1660516	http://www.reactome.org/PathwayBrowser/#/R-CEL-1660516	Synthesis of PIPs at the early endosome membrane	IEA	Caenorhabditis elegans	4	0	0	0
H2L2D3	R-CEL-1660516	http://www.reactome.org/PathwayBrowser/#/R-CEL-1660516	Synthesis of PIPs at the early endosome membrane	IEA	Caenorhabditis elegans	4	0	0	0
O45318	R-CEL-1660516	http://www.reactome.org/PathwayBrowser/#/R-CEL-1660516	Synthesis of PIPs at the early endosome membrane	IEA	Caenorhabditis elegans	4	0	0	0
Q21623	R-CEL-1660516	http://www.reactome.org/PathwayBrowser/#/R-CEL-1660516	Synthesis of PIPs at the early endosome membrane	IEA	Caenorhabditis elegans	3	0	0	0
Q23083	R-CEL-1660516	http://www.reactome.org/PathwayBrowser/#/R-CEL-1660516	Synthesis of PIPs at the early endosome membrane	IEA	Caenorhabditis elegans	4	0	0	0
Q23669	R-CEL-1660516	http://www.reactome.org/PathwayBrowser/#/R-CEL-1660516	Synthesis of PIPs at the early endosome membrane	IEA	Caenorhabditis elegans	8	0	0	0
Q5TYK9	R-CEL-1660516	http://www.reactome.org/PathwayBrowser/#/R-CEL-1660516	Synthesis of PIPs at the early endosome membrane	IEA	Caenorhabditis elegans	8	0	0	0
Q8MUM1	R-CEL-1660516	http://www.reactome.org/PathwayBrowser/#/R-CEL-1660516	Synthesis of PIPs at the early endosome membrane	IEA	Caenorhabditis elegans	3	0	0	0
Q9N589	R-CEL-1660516	http://www.reactome.org/PathwayBrowser/#/R-CEL-1660516	Synthesis of PIPs at the early endosome membrane	IEA	Caenorhabditis elegans	3	0	0	0
Q9TXI6	R-CEL-1660516	http://www.reactome.org/PathwayBrowser/#/R-CEL-1660516	Synthesis of PIPs at the early endosome membrane	IEA	Caenorhabditis elegans	8	0	0	0
Q9TXI7	R-CEL-1660516	http://www.reactome.org/PathwayBrowser/#/R-CEL-1660516	Synthesis of PIPs at the early endosome membrane	IEA	Caenorhabditis elegans	8	0	0	0
Q9U330	R-CEL-1660516	http://www.reactome.org/PathwayBrowser/#/R-CEL-1660516	Synthesis of PIPs at the early endosome membrane	IEA	Caenorhabditis elegans	1	0	0	0
Q9XZR0	R-CEL-1660516	http://www.reactome.org/PathwayBrowser/#/R-CEL-1660516	Synthesis of PIPs at the early endosome membrane	IEA	Caenorhabditis elegans	8	0	0	0
E9P864	R-CEL-1660517	http://www.reactome.org/PathwayBrowser/#/R-CEL-1660517	Synthesis of PIPs at the late endosome membrane	IEA	Caenorhabditis elegans	8	0	0	0
G5EBF2	R-CEL-1660517	http://www.reactome.org/PathwayBrowser/#/R-CEL-1660517	Synthesis of PIPs at the late endosome membrane	IEA	Caenorhabditis elegans	2	0	0	0
G5ED68	R-CEL-1660517	http://www.reactome.org/PathwayBrowser/#/R-CEL-1660517	Synthesis of PIPs at the late endosome membrane	IEA	Caenorhabditis elegans	2	0	0	0
G5EDY0	R-CEL-1660517	http://www.reactome.org/PathwayBrowser/#/R-CEL-1660517	Synthesis of PIPs at the late endosome membrane	IEA	Caenorhabditis elegans	4	0	0	0
Q23669	R-CEL-1660517	http://www.reactome.org/PathwayBrowser/#/R-CEL-1660517	Synthesis of PIPs at the late endosome membrane	IEA	Caenorhabditis elegans	8	0	0	0
Q5TYK9	R-CEL-1660517	http://www.reactome.org/PathwayBrowser/#/R-CEL-1660517	Synthesis of PIPs at the late endosome membrane	IEA	Caenorhabditis elegans	8	0	0	0
Q69Z15	R-CEL-1660517	http://www.reactome.org/PathwayBrowser/#/R-CEL-1660517	Synthesis of PIPs at the late endosome membrane	IEA	Caenorhabditis elegans	2	0	0	0
Q9N589	R-CEL-1660517	http://www.reactome.org/PathwayBrowser/#/R-CEL-1660517	Synthesis of PIPs at the late endosome membrane	IEA	Caenorhabditis elegans	3	0	0	0
Q9TXI6	R-CEL-1660517	http://www.reactome.org/PathwayBrowser/#/R-CEL-1660517	Synthesis of PIPs at the late endosome membrane	IEA	Caenorhabditis elegans	8	0	0	0
Q9TXI7	R-CEL-1660517	http://www.reactome.org/PathwayBrowser/#/R-CEL-1660517	Synthesis of PIPs at the late endosome membrane	IEA	Caenorhabditis elegans	8	0	0	0
Q9XZR0	R-CEL-1660517	http://www.reactome.org/PathwayBrowser/#/R-CEL-1660517	Synthesis of PIPs at the late endosome membrane	IEA	Caenorhabditis elegans	8	0	0	0
G5EC63	R-CEL-1660661	http://www.reactome.org/PathwayBrowser/#/R-CEL-1660661	Sphingolipid de novo biosynthesis	IEA	Caenorhabditis elegans	1	0	0	0
G5ED45	R-CEL-1660661	http://www.reactome.org/PathwayBrowser/#/R-CEL-1660661	Sphingolipid de novo biosynthesis	IEA	Caenorhabditis elegans	1	0	0	0
O16518	R-CEL-1660661	http://www.reactome.org/PathwayBrowser/#/R-CEL-1660661	Sphingolipid de novo biosynthesis	IEA	Caenorhabditis elegans	3	0	0	0
O44186	R-CEL-1660661	http://www.reactome.org/PathwayBrowser/#/R-CEL-1660661	Sphingolipid de novo biosynthesis	IEA	Caenorhabditis elegans	1	0	0	0
O44555	R-CEL-1660661	http://www.reactome.org/PathwayBrowser/#/R-CEL-1660661	Sphingolipid de novo biosynthesis	IEA	Caenorhabditis elegans	3	0	0	0
O45145	R-CEL-1660661	http://www.reactome.org/PathwayBrowser/#/R-CEL-1660661	Sphingolipid de novo biosynthesis	IEA	Caenorhabditis elegans	1	0	0	0
P91079	R-CEL-1660661	http://www.reactome.org/PathwayBrowser/#/R-CEL-1660661	Sphingolipid de novo biosynthesis	IEA	Caenorhabditis elegans	1	0	0	0
Q17456	R-CEL-1660661	http://www.reactome.org/PathwayBrowser/#/R-CEL-1660661	Sphingolipid de novo biosynthesis	IEA	Caenorhabditis elegans	1	1	0	0
Q18425	R-CEL-1660661	http://www.reactome.org/PathwayBrowser/#/R-CEL-1660661	Sphingolipid de novo biosynthesis	IEA	Caenorhabditis elegans	3	0	0	0
Q19403	R-CEL-1660661	http://www.reactome.org/PathwayBrowser/#/R-CEL-1660661	Sphingolipid de novo biosynthesis	IEA	Caenorhabditis elegans	1	0	0	0
Q20375	R-CEL-1660661	http://www.reactome.org/PathwayBrowser/#/R-CEL-1660661	Sphingolipid de novo biosynthesis	IEA	Caenorhabditis elegans	1	0	0	0
Q7Z139	R-CEL-1660661	http://www.reactome.org/PathwayBrowser/#/R-CEL-1660661	Sphingolipid de novo biosynthesis	IEA	Caenorhabditis elegans	1	0	0	0
Q86S57	R-CEL-1660661	http://www.reactome.org/PathwayBrowser/#/R-CEL-1660661	Sphingolipid de novo biosynthesis	IEA	Caenorhabditis elegans	3	0	0	0
Q8MXJ7	R-CEL-1660661	http://www.reactome.org/PathwayBrowser/#/R-CEL-1660661	Sphingolipid de novo biosynthesis	IEA	Caenorhabditis elegans	3	0	0	0
Q8WTM5	R-CEL-1660661	http://www.reactome.org/PathwayBrowser/#/R-CEL-1660661	Sphingolipid de novo biosynthesis	IEA	Caenorhabditis elegans	1	0	0	0
Q966E7	R-CEL-1660661	http://www.reactome.org/PathwayBrowser/#/R-CEL-1660661	Sphingolipid de novo biosynthesis	IEA	Caenorhabditis elegans	1	0	0	0
Q9U3D4	R-CEL-1660661	http://www.reactome.org/PathwayBrowser/#/R-CEL-1660661	Sphingolipid de novo biosynthesis	IEA	Caenorhabditis elegans	1	0	0	0
Q9XVI6	R-CEL-1660661	http://www.reactome.org/PathwayBrowser/#/R-CEL-1660661	Sphingolipid de novo biosynthesis	IEA	Caenorhabditis elegans	1	0	0	0
Q9XVS0	R-CEL-1660661	http://www.reactome.org/PathwayBrowser/#/R-CEL-1660661	Sphingolipid de novo biosynthesis	IEA	Caenorhabditis elegans	1	0	0	0
Q9Y194	R-CEL-1660661	http://www.reactome.org/PathwayBrowser/#/R-CEL-1660661	Sphingolipid de novo biosynthesis	IEA	Caenorhabditis elegans	1	0	0	0
U4PBG7	R-CEL-1660661	http://www.reactome.org/PathwayBrowser/#/R-CEL-1660661	Sphingolipid de novo biosynthesis	IEA	Caenorhabditis elegans	1	0	0	0
U4PBL3	R-CEL-1660661	http://www.reactome.org/PathwayBrowser/#/R-CEL-1660661	Sphingolipid de novo biosynthesis	IEA	Caenorhabditis elegans	1	0	0	0
U4PM16	R-CEL-1660661	http://www.reactome.org/PathwayBrowser/#/R-CEL-1660661	Sphingolipid de novo biosynthesis	IEA	Caenorhabditis elegans	1	0	0	0
A7DT41	R-CEL-1660662	http://www.reactome.org/PathwayBrowser/#/R-CEL-1660662	Glycosphingolipid metabolism	IEA	Caenorhabditis elegans	1	0	0	0
F5GUA0	R-CEL-1660662	http://www.reactome.org/PathwayBrowser/#/R-CEL-1660662	Glycosphingolipid metabolism	IEA	Caenorhabditis elegans	1	0	0	0
G5EC84	R-CEL-1660662	http://www.reactome.org/PathwayBrowser/#/R-CEL-1660662	Glycosphingolipid metabolism	IEA	Caenorhabditis elegans	1	1	0	0
H2L0G7	R-CEL-1660662	http://www.reactome.org/PathwayBrowser/#/R-CEL-1660662	Glycosphingolipid metabolism	IEA	Caenorhabditis elegans	1	0	0	0
O01893	R-CEL-1660662	http://www.reactome.org/PathwayBrowser/#/R-CEL-1660662	Glycosphingolipid metabolism	IEA	Caenorhabditis elegans	1	0	0	1
O18037	R-CEL-1660662	http://www.reactome.org/PathwayBrowser/#/R-CEL-1660662	Glycosphingolipid metabolism	IEA	Caenorhabditis elegans	1	0	0	0
O45686	R-CEL-1660662	http://www.reactome.org/PathwayBrowser/#/R-CEL-1660662	Glycosphingolipid metabolism	IEA	Caenorhabditis elegans	1	0	0	0
O45870	R-CEL-1660662	http://www.reactome.org/PathwayBrowser/#/R-CEL-1660662	Glycosphingolipid metabolism	IEA	Caenorhabditis elegans	1	0	0	0
O76632	R-CEL-1660662	http://www.reactome.org/PathwayBrowser/#/R-CEL-1660662	Glycosphingolipid metabolism	IEA	Caenorhabditis elegans	3	0	0	0
Q09551	R-CEL-1660662	http://www.reactome.org/PathwayBrowser/#/R-CEL-1660662	Glycosphingolipid metabolism	IEA	Caenorhabditis elegans	1	1	0	0
Q10916	R-CEL-1660662	http://www.reactome.org/PathwayBrowser/#/R-CEL-1660662	Glycosphingolipid metabolism	IEA	Caenorhabditis elegans	1	0	0	0
Q17540	R-CEL-1660662	http://www.reactome.org/PathwayBrowser/#/R-CEL-1660662	Glycosphingolipid metabolism	IEA	Caenorhabditis elegans	1	0	0	0
Q18924	R-CEL-1660662	http://www.reactome.org/PathwayBrowser/#/R-CEL-1660662	Glycosphingolipid metabolism	IEA	Caenorhabditis elegans	1	0	0	0
Q20086	R-CEL-1660662	http://www.reactome.org/PathwayBrowser/#/R-CEL-1660662	Glycosphingolipid metabolism	IEA	Caenorhabditis elegans	3	0	0	0
Q21054	R-CEL-1660662	http://www.reactome.org/PathwayBrowser/#/R-CEL-1660662	Glycosphingolipid metabolism	IEA	Caenorhabditis elegans	1	0	0	0
Q21333	R-CEL-1660662	http://www.reactome.org/PathwayBrowser/#/R-CEL-1660662	Glycosphingolipid metabolism	IEA	Caenorhabditis elegans	1	0	0	0
Q21801	R-CEL-1660662	http://www.reactome.org/PathwayBrowser/#/R-CEL-1660662	Glycosphingolipid metabolism	IEA	Caenorhabditis elegans	1	1	0	0
Q22129	R-CEL-1660662	http://www.reactome.org/PathwayBrowser/#/R-CEL-1660662	Glycosphingolipid metabolism	IEA	Caenorhabditis elegans	1	0	0	0
Q22492	R-CEL-1660662	http://www.reactome.org/PathwayBrowser/#/R-CEL-1660662	Glycosphingolipid metabolism	IEA	Caenorhabditis elegans	4	0	0	0
Q27526	R-CEL-1660662	http://www.reactome.org/PathwayBrowser/#/R-CEL-1660662	Glycosphingolipid metabolism	IEA	Caenorhabditis elegans	3	1	0	0
Q6EUT3	R-CEL-1660662	http://www.reactome.org/PathwayBrowser/#/R-CEL-1660662	Glycosphingolipid metabolism	IEA	Caenorhabditis elegans	1	0	0	0
Q6EUT4	R-CEL-1660662	http://www.reactome.org/PathwayBrowser/#/R-CEL-1660662	Glycosphingolipid metabolism	IEA	Caenorhabditis elegans	1	0	0	0
Q8WQB2	R-CEL-1660662	http://www.reactome.org/PathwayBrowser/#/R-CEL-1660662	Glycosphingolipid metabolism	IEA	Caenorhabditis elegans	1	0	0	0
Q95QT2	R-CEL-1660662	http://www.reactome.org/PathwayBrowser/#/R-CEL-1660662	Glycosphingolipid metabolism	IEA	Caenorhabditis elegans	1	0	0	0
Q9BKS2	R-CEL-1660662	http://www.reactome.org/PathwayBrowser/#/R-CEL-1660662	Glycosphingolipid metabolism	IEA	Caenorhabditis elegans	1	0	0	0
Q9TZI1	R-CEL-1660662	http://www.reactome.org/PathwayBrowser/#/R-CEL-1660662	Glycosphingolipid metabolism	IEA	Caenorhabditis elegans	1	0	0	0
Q9UAY4	R-CEL-1660662	http://www.reactome.org/PathwayBrowser/#/R-CEL-1660662	Glycosphingolipid metabolism	IEA	Caenorhabditis elegans	1	0	0	0
B5BM23	R-CEL-166208	http://www.reactome.org/PathwayBrowser/#/R-CEL-166208	mTORC1-mediated signalling	IEA	Caenorhabditis elegans	7	0	0	0
B5BM24	R-CEL-166208	http://www.reactome.org/PathwayBrowser/#/R-CEL-166208	mTORC1-mediated signalling	IEA	Caenorhabditis elegans	7	0	0	0
B5BM25	R-CEL-166208	http://www.reactome.org/PathwayBrowser/#/R-CEL-166208	mTORC1-mediated signalling	IEA	Caenorhabditis elegans	7	0	0	0
O01991	R-CEL-166208	http://www.reactome.org/PathwayBrowser/#/R-CEL-166208	mTORC1-mediated signalling	IEA	Caenorhabditis elegans	1	0	0	0
Q21531	R-CEL-166208	http://www.reactome.org/PathwayBrowser/#/R-CEL-166208	mTORC1-mediated signalling	IEA	Caenorhabditis elegans	7	0	0	0
Q7JMF0	R-CEL-166208	http://www.reactome.org/PathwayBrowser/#/R-CEL-166208	mTORC1-mediated signalling	IEA	Caenorhabditis elegans	7	0	0	0
Q9NAH6	R-CEL-166208	http://www.reactome.org/PathwayBrowser/#/R-CEL-166208	mTORC1-mediated signalling	IEA	Caenorhabditis elegans	2	0	0	0
Q9NEN6	R-CEL-166208	http://www.reactome.org/PathwayBrowser/#/R-CEL-166208	mTORC1-mediated signalling	IEA	Caenorhabditis elegans	10	0	0	0
H2KZG0	R-CEL-167044	http://www.reactome.org/PathwayBrowser/#/R-CEL-167044	Signalling to RAS	IEA	Caenorhabditis elegans	11	0	0	0
H2KZG1	R-CEL-167044	http://www.reactome.org/PathwayBrowser/#/R-CEL-167044	Signalling to RAS	IEA	Caenorhabditis elegans	11	0	0	0
H2KZG2	R-CEL-167044	http://www.reactome.org/PathwayBrowser/#/R-CEL-167044	Signalling to RAS	IEA	Caenorhabditis elegans	11	0	0	0
P29355	R-CEL-167044	http://www.reactome.org/PathwayBrowser/#/R-CEL-167044	Signalling to RAS	IEA	Caenorhabditis elegans	19	0	0	0
Q9N5D3	R-CEL-167044	http://www.reactome.org/PathwayBrowser/#/R-CEL-167044	Signalling to RAS	IEA	Caenorhabditis elegans	18	0	0	0
Q9NBD3	R-CEL-167044	http://www.reactome.org/PathwayBrowser/#/R-CEL-167044	Signalling to RAS	IEA	Caenorhabditis elegans	18	0	0	0
Q9TYT3	R-CEL-167044	http://www.reactome.org/PathwayBrowser/#/R-CEL-167044	Signalling to RAS	IEA	Caenorhabditis elegans	11	0	0	0
O01883	R-CEL-167826	http://www.reactome.org/PathwayBrowser/#/R-CEL-167826	The fatty acid cycling model	IEA	Caenorhabditis elegans	2	0	0	0
O01883	R-CEL-167827	http://www.reactome.org/PathwayBrowser/#/R-CEL-167827	The proton buffering model	IEA	Caenorhabditis elegans	2	0	0	0
E9P859	R-CEL-1679131	http://www.reactome.org/PathwayBrowser/#/R-CEL-1679131	Trafficking and processing of endosomal TLR	IEA	Caenorhabditis elegans	1	0	0	0
G5EBF4	R-CEL-1679131	http://www.reactome.org/PathwayBrowser/#/R-CEL-1679131	Trafficking and processing of endosomal TLR	IEA	Caenorhabditis elegans	1	0	0	0
G5EDB0	R-CEL-1679131	http://www.reactome.org/PathwayBrowser/#/R-CEL-1679131	Trafficking and processing of endosomal TLR	IEA	Caenorhabditis elegans	1	0	0	0
H2L281	R-CEL-1679131	http://www.reactome.org/PathwayBrowser/#/R-CEL-1679131	Trafficking and processing of endosomal TLR	IEA	Caenorhabditis elegans	6	0	0	0
H9G333	R-CEL-1679131	http://www.reactome.org/PathwayBrowser/#/R-CEL-1679131	Trafficking and processing of endosomal TLR	IEA	Caenorhabditis elegans	4	0	0	0
O16288	R-CEL-1679131	http://www.reactome.org/PathwayBrowser/#/R-CEL-1679131	Trafficking and processing of endosomal TLR	IEA	Caenorhabditis elegans	2	0	0	0
O16289	R-CEL-1679131	http://www.reactome.org/PathwayBrowser/#/R-CEL-1679131	Trafficking and processing of endosomal TLR	IEA	Caenorhabditis elegans	2	1	0	0
O45466	R-CEL-1679131	http://www.reactome.org/PathwayBrowser/#/R-CEL-1679131	Trafficking and processing of endosomal TLR	IEA	Caenorhabditis elegans	2	0	0	0
O45734	R-CEL-1679131	http://www.reactome.org/PathwayBrowser/#/R-CEL-1679131	Trafficking and processing of endosomal TLR	IEA	Caenorhabditis elegans	4	0	0	0
P25807	R-CEL-1679131	http://www.reactome.org/PathwayBrowser/#/R-CEL-1679131	Trafficking and processing of endosomal TLR	IEA	Caenorhabditis elegans	2	1	0	0
P43507	R-CEL-1679131	http://www.reactome.org/PathwayBrowser/#/R-CEL-1679131	Trafficking and processing of endosomal TLR	IEA	Caenorhabditis elegans	2	1	0	0
P43508	R-CEL-1679131	http://www.reactome.org/PathwayBrowser/#/R-CEL-1679131	Trafficking and processing of endosomal TLR	IEA	Caenorhabditis elegans	2	1	0	0
P43509	R-CEL-1679131	http://www.reactome.org/PathwayBrowser/#/R-CEL-1679131	Trafficking and processing of endosomal TLR	IEA	Caenorhabditis elegans	2	0	0	0
P43510	R-CEL-1679131	http://www.reactome.org/PathwayBrowser/#/R-CEL-1679131	Trafficking and processing of endosomal TLR	IEA	Caenorhabditis elegans	2	0	0	0
P91991	R-CEL-1679131	http://www.reactome.org/PathwayBrowser/#/R-CEL-1679131	Trafficking and processing of endosomal TLR	IEA	Caenorhabditis elegans	2	1	0	0
Q20950	R-CEL-1679131	http://www.reactome.org/PathwayBrowser/#/R-CEL-1679131	Trafficking and processing of endosomal TLR	IEA	Caenorhabditis elegans	2	1	0	0
Q22187	R-CEL-1679131	http://www.reactome.org/PathwayBrowser/#/R-CEL-1679131	Trafficking and processing of endosomal TLR	IEA	Caenorhabditis elegans	6	0	0	0
Q22235	R-CEL-1679131	http://www.reactome.org/PathwayBrowser/#/R-CEL-1679131	Trafficking and processing of endosomal TLR	IEA	Caenorhabditis elegans	1	0	0	0
Q93380	R-CEL-1679131	http://www.reactome.org/PathwayBrowser/#/R-CEL-1679131	Trafficking and processing of endosomal TLR	IEA	Caenorhabditis elegans	1	0	0	0
Q9BIW9	R-CEL-1679131	http://www.reactome.org/PathwayBrowser/#/R-CEL-1679131	Trafficking and processing of endosomal TLR	IEA	Caenorhabditis elegans	6	0	0	0
Q9BL59	R-CEL-1679131	http://www.reactome.org/PathwayBrowser/#/R-CEL-1679131	Trafficking and processing of endosomal TLR	IEA	Caenorhabditis elegans	2	0	0	0
Q9N5Z3	R-CEL-1679131	http://www.reactome.org/PathwayBrowser/#/R-CEL-1679131	Trafficking and processing of endosomal TLR	IEA	Caenorhabditis elegans	6	0	0	0
Q9U589	R-CEL-1679131	http://www.reactome.org/PathwayBrowser/#/R-CEL-1679131	Trafficking and processing of endosomal TLR	IEA	Caenorhabditis elegans	1	0	0	0
V6CLS8	R-CEL-1679131	http://www.reactome.org/PathwayBrowser/#/R-CEL-1679131	Trafficking and processing of endosomal TLR	IEA	Caenorhabditis elegans	2	0	0	0
V6CLX0	R-CEL-1679131	http://www.reactome.org/PathwayBrowser/#/R-CEL-1679131	Trafficking and processing of endosomal TLR	IEA	Caenorhabditis elegans	2	0	0	0
E9P864	R-CEL-168138	http://www.reactome.org/PathwayBrowser/#/R-CEL-168138	Toll Like Receptor 9 (TLR9) Cascade	IEA	Caenorhabditis elegans	8	0	0	0
G5ED80	R-CEL-168138	http://www.reactome.org/PathwayBrowser/#/R-CEL-168138	Toll Like Receptor 9 (TLR9) Cascade	IEA	Caenorhabditis elegans	1	0	0	0
H2L281	R-CEL-168138	http://www.reactome.org/PathwayBrowser/#/R-CEL-168138	Toll Like Receptor 9 (TLR9) Cascade	IEA	Caenorhabditis elegans	6	0	0	0
Q22187	R-CEL-168138	http://www.reactome.org/PathwayBrowser/#/R-CEL-168138	Toll Like Receptor 9 (TLR9) Cascade	IEA	Caenorhabditis elegans	6	0	0	0
Q23669	R-CEL-168138	http://www.reactome.org/PathwayBrowser/#/R-CEL-168138	Toll Like Receptor 9 (TLR9) Cascade	IEA	Caenorhabditis elegans	8	0	0	0
Q5FC45	R-CEL-168138	http://www.reactome.org/PathwayBrowser/#/R-CEL-168138	Toll Like Receptor 9 (TLR9) Cascade	IEA	Caenorhabditis elegans	1	0	0	0
Q5TYK9	R-CEL-168138	http://www.reactome.org/PathwayBrowser/#/R-CEL-168138	Toll Like Receptor 9 (TLR9) Cascade	IEA	Caenorhabditis elegans	8	0	0	0
Q9BIW9	R-CEL-168138	http://www.reactome.org/PathwayBrowser/#/R-CEL-168138	Toll Like Receptor 9 (TLR9) Cascade	IEA	Caenorhabditis elegans	6	0	0	0
Q9N5Z3	R-CEL-168138	http://www.reactome.org/PathwayBrowser/#/R-CEL-168138	Toll Like Receptor 9 (TLR9) Cascade	IEA	Caenorhabditis elegans	6	0	0	0
Q9TXI6	R-CEL-168138	http://www.reactome.org/PathwayBrowser/#/R-CEL-168138	Toll Like Receptor 9 (TLR9) Cascade	IEA	Caenorhabditis elegans	8	0	0	0
Q9TXI7	R-CEL-168138	http://www.reactome.org/PathwayBrowser/#/R-CEL-168138	Toll Like Receptor 9 (TLR9) Cascade	IEA	Caenorhabditis elegans	8	0	0	0
Q9XZR0	R-CEL-168138	http://www.reactome.org/PathwayBrowser/#/R-CEL-168138	Toll Like Receptor 9 (TLR9) Cascade	IEA	Caenorhabditis elegans	8	0	0	0
H2L281	R-CEL-168181	http://www.reactome.org/PathwayBrowser/#/R-CEL-168181	Toll Like Receptor 7/8 (TLR7/8) Cascade	IEA	Caenorhabditis elegans	6	0	0	0
Q22187	R-CEL-168181	http://www.reactome.org/PathwayBrowser/#/R-CEL-168181	Toll Like Receptor 7/8 (TLR7/8) Cascade	IEA	Caenorhabditis elegans	6	0	0	0
Q9BIW9	R-CEL-168181	http://www.reactome.org/PathwayBrowser/#/R-CEL-168181	Toll Like Receptor 7/8 (TLR7/8) Cascade	IEA	Caenorhabditis elegans	6	0	0	0
Q9N5Z3	R-CEL-168181	http://www.reactome.org/PathwayBrowser/#/R-CEL-168181	Toll Like Receptor 7/8 (TLR7/8) Cascade	IEA	Caenorhabditis elegans	6	0	0	0
G5EDF7	R-CEL-168638	http://www.reactome.org/PathwayBrowser/#/R-CEL-168638	NOD1/2 Signaling Pathway	IEA	Caenorhabditis elegans	3	0	0	0
O44514	R-CEL-168638	http://www.reactome.org/PathwayBrowser/#/R-CEL-168638	NOD1/2 Signaling Pathway	IEA	Caenorhabditis elegans	10	0	0	0
P91376	R-CEL-168638	http://www.reactome.org/PathwayBrowser/#/R-CEL-168638	NOD1/2 Signaling Pathway	IEA	Caenorhabditis elegans	10	0	0	0
Q17446	R-CEL-168638	http://www.reactome.org/PathwayBrowser/#/R-CEL-168638	NOD1/2 Signaling Pathway	IEA	Caenorhabditis elegans	10	0	0	0
Q8MXI4	R-CEL-168638	http://www.reactome.org/PathwayBrowser/#/R-CEL-168638	NOD1/2 Signaling Pathway	IEA	Caenorhabditis elegans	10	0	0	0
U4PAQ0	R-CEL-168638	http://www.reactome.org/PathwayBrowser/#/R-CEL-168638	NOD1/2 Signaling Pathway	IEA	Caenorhabditis elegans	10	0	0	0
U4PB54	R-CEL-168638	http://www.reactome.org/PathwayBrowser/#/R-CEL-168638	NOD1/2 Signaling Pathway	IEA	Caenorhabditis elegans	10	0	0	0
U4PDY6	R-CEL-168638	http://www.reactome.org/PathwayBrowser/#/R-CEL-168638	NOD1/2 Signaling Pathway	IEA	Caenorhabditis elegans	10	0	0	0
G5EF72	R-CEL-170660	http://www.reactome.org/PathwayBrowser/#/R-CEL-170660	Adenylate cyclase activating pathway	IEA	Caenorhabditis elegans	7	0	0	0
O16880	R-CEL-170660	http://www.reactome.org/PathwayBrowser/#/R-CEL-170660	Adenylate cyclase activating pathway	IEA	Caenorhabditis elegans	10	0	0	0
Q19523	R-CEL-170660	http://www.reactome.org/PathwayBrowser/#/R-CEL-170660	Adenylate cyclase activating pathway	IEA	Caenorhabditis elegans	10	0	0	0
Q7KPV0	R-CEL-170660	http://www.reactome.org/PathwayBrowser/#/R-CEL-170660	Adenylate cyclase activating pathway	IEA	Caenorhabditis elegans	7	0	0	0
V6CL61	R-CEL-170660	http://www.reactome.org/PathwayBrowser/#/R-CEL-170660	Adenylate cyclase activating pathway	IEA	Caenorhabditis elegans	7	0	0	0
G5EF72	R-CEL-170670	http://www.reactome.org/PathwayBrowser/#/R-CEL-170670	Adenylate cyclase inhibitory pathway	IEA	Caenorhabditis elegans	7	0	0	0
G5EF72	R-CEL-170670	http://www.reactome.org/PathwayBrowser/#/R-CEL-170670	Adenylate cyclase inhibitory pathway	IEA	Caenorhabditis elegans	7	0	0	0
O16880	R-CEL-170670	http://www.reactome.org/PathwayBrowser/#/R-CEL-170670	Adenylate cyclase inhibitory pathway	IEA	Caenorhabditis elegans	10	0	0	0
O16880	R-CEL-170670	http://www.reactome.org/PathwayBrowser/#/R-CEL-170670	Adenylate cyclase inhibitory pathway	IEA	Caenorhabditis elegans	10	0	0	0
Q19523	R-CEL-170670	http://www.reactome.org/PathwayBrowser/#/R-CEL-170670	Adenylate cyclase inhibitory pathway	IEA	Caenorhabditis elegans	10	0	0	0
Q19523	R-CEL-170670	http://www.reactome.org/PathwayBrowser/#/R-CEL-170670	Adenylate cyclase inhibitory pathway	IEA	Caenorhabditis elegans	10	0	0	0
Q7KPV0	R-CEL-170670	http://www.reactome.org/PathwayBrowser/#/R-CEL-170670	Adenylate cyclase inhibitory pathway	IEA	Caenorhabditis elegans	7	0	0	0
Q7KPV0	R-CEL-170670	http://www.reactome.org/PathwayBrowser/#/R-CEL-170670	Adenylate cyclase inhibitory pathway	IEA	Caenorhabditis elegans	7	0	0	0
Q9BIG5	R-CEL-170670	http://www.reactome.org/PathwayBrowser/#/R-CEL-170670	Adenylate cyclase inhibitory pathway	IEA	Caenorhabditis elegans	7	0	0	0
Q9BIG5	R-CEL-170670	http://www.reactome.org/PathwayBrowser/#/R-CEL-170670	Adenylate cyclase inhibitory pathway	IEA	Caenorhabditis elegans	7	0	0	0
Q9N2V6	R-CEL-170670	http://www.reactome.org/PathwayBrowser/#/R-CEL-170670	Adenylate cyclase inhibitory pathway	IEA	Caenorhabditis elegans	7	0	0	0
Q9N2V6	R-CEL-170670	http://www.reactome.org/PathwayBrowser/#/R-CEL-170670	Adenylate cyclase inhibitory pathway	IEA	Caenorhabditis elegans	7	0	0	0
V6CL61	R-CEL-170670	http://www.reactome.org/PathwayBrowser/#/R-CEL-170670	Adenylate cyclase inhibitory pathway	IEA	Caenorhabditis elegans	7	0	0	0
V6CL61	R-CEL-170670	http://www.reactome.org/PathwayBrowser/#/R-CEL-170670	Adenylate cyclase inhibitory pathway	IEA	Caenorhabditis elegans	7	0	0	0
Q19440	R-CEL-170822	http://www.reactome.org/PathwayBrowser/#/R-CEL-170822	Regulation of Glucokinase by Glucokinase Regulatory Protein	IEA	Caenorhabditis elegans	3	0	0	0
Q6BET1	R-CEL-170822	http://www.reactome.org/PathwayBrowser/#/R-CEL-170822	Regulation of Glucokinase by Glucokinase Regulatory Protein	IEA	Caenorhabditis elegans	3	0	0	0
G4SFM6	R-CEL-171007	http://www.reactome.org/PathwayBrowser/#/R-CEL-171007	p38MAPK events	IEA	Caenorhabditis elegans	1	0	0	0
O44514	R-CEL-171007	http://www.reactome.org/PathwayBrowser/#/R-CEL-171007	p38MAPK events	IEA	Caenorhabditis elegans	10	0	0	0
P22981	R-CEL-171007	http://www.reactome.org/PathwayBrowser/#/R-CEL-171007	p38MAPK events	IEA	Caenorhabditis elegans	19	0	0	0
P91376	R-CEL-171007	http://www.reactome.org/PathwayBrowser/#/R-CEL-171007	p38MAPK events	IEA	Caenorhabditis elegans	10	0	0	0
Q17446	R-CEL-171007	http://www.reactome.org/PathwayBrowser/#/R-CEL-171007	p38MAPK events	IEA	Caenorhabditis elegans	10	0	0	0
Q19852	R-CEL-171007	http://www.reactome.org/PathwayBrowser/#/R-CEL-171007	p38MAPK events	IEA	Caenorhabditis elegans	1	0	0	0
Q8MXI4	R-CEL-171007	http://www.reactome.org/PathwayBrowser/#/R-CEL-171007	p38MAPK events	IEA	Caenorhabditis elegans	10	0	0	0
Q965G5	R-CEL-171007	http://www.reactome.org/PathwayBrowser/#/R-CEL-171007	p38MAPK events	IEA	Caenorhabditis elegans	7	0	0	0
U4PAQ0	R-CEL-171007	http://www.reactome.org/PathwayBrowser/#/R-CEL-171007	p38MAPK events	IEA	Caenorhabditis elegans	10	0	0	0
U4PB54	R-CEL-171007	http://www.reactome.org/PathwayBrowser/#/R-CEL-171007	p38MAPK events	IEA	Caenorhabditis elegans	10	0	0	0
U4PDY6	R-CEL-171007	http://www.reactome.org/PathwayBrowser/#/R-CEL-171007	p38MAPK events	IEA	Caenorhabditis elegans	10	0	0	0
H2KZX4	R-CEL-171052	http://www.reactome.org/PathwayBrowser/#/R-CEL-171052	LDL-mediated lipid transport	IEA	Caenorhabditis elegans	1	0	0	0
Q7JP80	R-CEL-171052	http://www.reactome.org/PathwayBrowser/#/R-CEL-171052	LDL-mediated lipid transport	IEA	Caenorhabditis elegans	1	0	0	0
Q19905	R-CEL-173599	http://www.reactome.org/PathwayBrowser/#/R-CEL-173599	Formation of the active cofactor, UDP-glucuronate	IEA	Caenorhabditis elegans	1	0	0	0
Q69Z13	R-CEL-173599	http://www.reactome.org/PathwayBrowser/#/R-CEL-173599	Formation of the active cofactor, UDP-glucuronate	IEA	Caenorhabditis elegans	2	0	0	0
Q86D12	R-CEL-173599	http://www.reactome.org/PathwayBrowser/#/R-CEL-173599	Formation of the active cofactor, UDP-glucuronate	IEA	Caenorhabditis elegans	2	0	0	0
Q8WQE5	R-CEL-173599	http://www.reactome.org/PathwayBrowser/#/R-CEL-173599	Formation of the active cofactor, UDP-glucuronate	IEA	Caenorhabditis elegans	2	0	0	0
Q9XUS4	R-CEL-173599	http://www.reactome.org/PathwayBrowser/#/R-CEL-173599	Formation of the active cofactor, UDP-glucuronate	IEA	Caenorhabditis elegans	2	0	0	0
Q9XUS5	R-CEL-173599	http://www.reactome.org/PathwayBrowser/#/R-CEL-173599	Formation of the active cofactor, UDP-glucuronate	IEA	Caenorhabditis elegans	2	0	0	0
Q9XUS6	R-CEL-173599	http://www.reactome.org/PathwayBrowser/#/R-CEL-173599	Formation of the active cofactor, UDP-glucuronate	IEA	Caenorhabditis elegans	2	0	0	0
C0Z1Y9	R-CEL-174113	http://www.reactome.org/PathwayBrowser/#/R-CEL-174113	SCF-beta-TrCP mediated degradation of Emi1	IEA	Caenorhabditis elegans	12	0	0	0
G5EC92	R-CEL-174113	http://www.reactome.org/PathwayBrowser/#/R-CEL-174113	SCF-beta-TrCP mediated degradation of Emi1	IEA	Caenorhabditis elegans	6	0	0	0
G5ECU1	R-CEL-174113	http://www.reactome.org/PathwayBrowser/#/R-CEL-174113	SCF-beta-TrCP mediated degradation of Emi1	IEA	Caenorhabditis elegans	6	0	0	0
G5ECY4	R-CEL-174113	http://www.reactome.org/PathwayBrowser/#/R-CEL-174113	SCF-beta-TrCP mediated degradation of Emi1	IEA	Caenorhabditis elegans	6	0	0	0
G5EDD8	R-CEL-174113	http://www.reactome.org/PathwayBrowser/#/R-CEL-174113	SCF-beta-TrCP mediated degradation of Emi1	IEA	Caenorhabditis elegans	6	0	0	0
G5EDY3	R-CEL-174113	http://www.reactome.org/PathwayBrowser/#/R-CEL-174113	SCF-beta-TrCP mediated degradation of Emi1	IEA	Caenorhabditis elegans	6	0	0	0
G5EE67	R-CEL-174113	http://www.reactome.org/PathwayBrowser/#/R-CEL-174113	SCF-beta-TrCP mediated degradation of Emi1	IEA	Caenorhabditis elegans	6	0	0	0
G5EE88	R-CEL-174113	http://www.reactome.org/PathwayBrowser/#/R-CEL-174113	SCF-beta-TrCP mediated degradation of Emi1	IEA	Caenorhabditis elegans	6	0	0	0
G5EE98	R-CEL-174113	http://www.reactome.org/PathwayBrowser/#/R-CEL-174113	SCF-beta-TrCP mediated degradation of Emi1	IEA	Caenorhabditis elegans	6	0	0	0
G5EEX4	R-CEL-174113	http://www.reactome.org/PathwayBrowser/#/R-CEL-174113	SCF-beta-TrCP mediated degradation of Emi1	IEA	Caenorhabditis elegans	6	1	0	0
G5EFA9	R-CEL-174113	http://www.reactome.org/PathwayBrowser/#/R-CEL-174113	SCF-beta-TrCP mediated degradation of Emi1	IEA	Caenorhabditis elegans	6	1	0	0
G5EG39	R-CEL-174113	http://www.reactome.org/PathwayBrowser/#/R-CEL-174113	SCF-beta-TrCP mediated degradation of Emi1	IEA	Caenorhabditis elegans	6	1	0	0
G5EGD5	R-CEL-174113	http://www.reactome.org/PathwayBrowser/#/R-CEL-174113	SCF-beta-TrCP mediated degradation of Emi1	IEA	Caenorhabditis elegans	6	0	0	0
G5EGN7	R-CEL-174113	http://www.reactome.org/PathwayBrowser/#/R-CEL-174113	SCF-beta-TrCP mediated degradation of Emi1	IEA	Caenorhabditis elegans	6	0	0	0
K7ZUR1	R-CEL-174113	http://www.reactome.org/PathwayBrowser/#/R-CEL-174113	SCF-beta-TrCP mediated degradation of Emi1	IEA	Caenorhabditis elegans	12	0	0	0
N1NTN5	R-CEL-174113	http://www.reactome.org/PathwayBrowser/#/R-CEL-174113	SCF-beta-TrCP mediated degradation of Emi1	IEA	Caenorhabditis elegans	12	0	0	0
O16368	R-CEL-174113	http://www.reactome.org/PathwayBrowser/#/R-CEL-174113	SCF-beta-TrCP mediated degradation of Emi1	IEA	Caenorhabditis elegans	12	0	0	0
O17071	R-CEL-174113	http://www.reactome.org/PathwayBrowser/#/R-CEL-174113	SCF-beta-TrCP mediated degradation of Emi1	IEA	Caenorhabditis elegans	12	0	0	0
O17586	R-CEL-174113	http://www.reactome.org/PathwayBrowser/#/R-CEL-174113	SCF-beta-TrCP mediated degradation of Emi1	IEA	Caenorhabditis elegans	12	0	0	0
O44156	R-CEL-174113	http://www.reactome.org/PathwayBrowser/#/R-CEL-174113	SCF-beta-TrCP mediated degradation of Emi1	IEA	Caenorhabditis elegans	12	0	0	0
O61742	R-CEL-174113	http://www.reactome.org/PathwayBrowser/#/R-CEL-174113	SCF-beta-TrCP mediated degradation of Emi1	IEA	Caenorhabditis elegans	12	0	0	0
O61792	R-CEL-174113	http://www.reactome.org/PathwayBrowser/#/R-CEL-174113	SCF-beta-TrCP mediated degradation of Emi1	IEA	Caenorhabditis elegans	12	0	0	0
O62102	R-CEL-174113	http://www.reactome.org/PathwayBrowser/#/R-CEL-174113	SCF-beta-TrCP mediated degradation of Emi1	IEA	Caenorhabditis elegans	12	0	0	0
O76371	R-CEL-174113	http://www.reactome.org/PathwayBrowser/#/R-CEL-174113	SCF-beta-TrCP mediated degradation of Emi1	IEA	Caenorhabditis elegans	12	0	0	0
O76577	R-CEL-174113	http://www.reactome.org/PathwayBrowser/#/R-CEL-174113	SCF-beta-TrCP mediated degradation of Emi1	IEA	Caenorhabditis elegans	12	0	0	0
P34286	R-CEL-174113	http://www.reactome.org/PathwayBrowser/#/R-CEL-174113	SCF-beta-TrCP mediated degradation of Emi1	IEA	Caenorhabditis elegans	12	0	0	0
P34481	R-CEL-174113	http://www.reactome.org/PathwayBrowser/#/R-CEL-174113	SCF-beta-TrCP mediated degradation of Emi1	IEA	Caenorhabditis elegans	12	0	0	0
P37165	R-CEL-174113	http://www.reactome.org/PathwayBrowser/#/R-CEL-174113	SCF-beta-TrCP mediated degradation of Emi1	IEA	Caenorhabditis elegans	51	0	0	0
P41883	R-CEL-174113	http://www.reactome.org/PathwayBrowser/#/R-CEL-174113	SCF-beta-TrCP mediated degradation of Emi1	IEA	Caenorhabditis elegans	12	0	0	0
P46502	R-CEL-174113	http://www.reactome.org/PathwayBrowser/#/R-CEL-174113	SCF-beta-TrCP mediated degradation of Emi1	IEA	Caenorhabditis elegans	12	0	0	0
P49632	R-CEL-174113	http://www.reactome.org/PathwayBrowser/#/R-CEL-174113	SCF-beta-TrCP mediated degradation of Emi1	IEA	Caenorhabditis elegans	48	0	0	0
P90868	R-CEL-174113	http://www.reactome.org/PathwayBrowser/#/R-CEL-174113	SCF-beta-TrCP mediated degradation of Emi1	IEA	Caenorhabditis elegans	12	0	0	0
P91025	R-CEL-174113	http://www.reactome.org/PathwayBrowser/#/R-CEL-174113	SCF-beta-TrCP mediated degradation of Emi1	IEA	Caenorhabditis elegans	12	0	0	0
P91477	R-CEL-174113	http://www.reactome.org/PathwayBrowser/#/R-CEL-174113	SCF-beta-TrCP mediated degradation of Emi1	IEA	Caenorhabditis elegans	12	0	0	0
P91834	R-CEL-174113	http://www.reactome.org/PathwayBrowser/#/R-CEL-174113	SCF-beta-TrCP mediated degradation of Emi1	IEA	Caenorhabditis elegans	12	0	0	0
Q04908	R-CEL-174113	http://www.reactome.org/PathwayBrowser/#/R-CEL-174113	SCF-beta-TrCP mediated degradation of Emi1	IEA	Caenorhabditis elegans	12	0	0	0
Q09373	R-CEL-174113	http://www.reactome.org/PathwayBrowser/#/R-CEL-174113	SCF-beta-TrCP mediated degradation of Emi1	IEA	Caenorhabditis elegans	5	0	0	0
Q09557	R-CEL-174113	http://www.reactome.org/PathwayBrowser/#/R-CEL-174113	SCF-beta-TrCP mediated degradation of Emi1	IEA	Caenorhabditis elegans	51	0	0	0
Q09583	R-CEL-174113	http://www.reactome.org/PathwayBrowser/#/R-CEL-174113	SCF-beta-TrCP mediated degradation of Emi1	IEA	Caenorhabditis elegans	12	0	0	0
Q09649	R-CEL-174113	http://www.reactome.org/PathwayBrowser/#/R-CEL-174113	SCF-beta-TrCP mediated degradation of Emi1	IEA	Caenorhabditis elegans	3	0	0	0
Q09990	R-CEL-174113	http://www.reactome.org/PathwayBrowser/#/R-CEL-174113	SCF-beta-TrCP mediated degradation of Emi1	IEA	Caenorhabditis elegans	4	0	0	0
Q10920	R-CEL-174113	http://www.reactome.org/PathwayBrowser/#/R-CEL-174113	SCF-beta-TrCP mediated degradation of Emi1	IEA	Caenorhabditis elegans	12	0	0	0
Q17389	R-CEL-174113	http://www.reactome.org/PathwayBrowser/#/R-CEL-174113	SCF-beta-TrCP mediated degradation of Emi1	IEA	Caenorhabditis elegans	6	0	0	0
Q17971	R-CEL-174113	http://www.reactome.org/PathwayBrowser/#/R-CEL-174113	SCF-beta-TrCP mediated degradation of Emi1	IEA	Caenorhabditis elegans	12	0	0	0
Q18115	R-CEL-174113	http://www.reactome.org/PathwayBrowser/#/R-CEL-174113	SCF-beta-TrCP mediated degradation of Emi1	IEA	Caenorhabditis elegans	12	0	0	0
Q18567	R-CEL-174113	http://www.reactome.org/PathwayBrowser/#/R-CEL-174113	SCF-beta-TrCP mediated degradation of Emi1	IEA	Caenorhabditis elegans	6	0	0	0
Q18787	R-CEL-174113	http://www.reactome.org/PathwayBrowser/#/R-CEL-174113	SCF-beta-TrCP mediated degradation of Emi1	IEA	Caenorhabditis elegans	12	0	0	0
Q19324	R-CEL-174113	http://www.reactome.org/PathwayBrowser/#/R-CEL-174113	SCF-beta-TrCP mediated degradation of Emi1	IEA	Caenorhabditis elegans	12	0	0	0
Q1ZXS9	R-CEL-174113	http://www.reactome.org/PathwayBrowser/#/R-CEL-174113	SCF-beta-TrCP mediated degradation of Emi1	IEA	Caenorhabditis elegans	12	0	0	0
Q20585	R-CEL-174113	http://www.reactome.org/PathwayBrowser/#/R-CEL-174113	SCF-beta-TrCP mediated degradation of Emi1	IEA	Caenorhabditis elegans	12	0	0	0
Q20938	R-CEL-174113	http://www.reactome.org/PathwayBrowser/#/R-CEL-174113	SCF-beta-TrCP mediated degradation of Emi1	IEA	Caenorhabditis elegans	12	0	0	0
Q21346	R-CEL-174113	http://www.reactome.org/PathwayBrowser/#/R-CEL-174113	SCF-beta-TrCP mediated degradation of Emi1	IEA	Caenorhabditis elegans	6	0	0	0
Q21367	R-CEL-174113	http://www.reactome.org/PathwayBrowser/#/R-CEL-174113	SCF-beta-TrCP mediated degradation of Emi1	IEA	Caenorhabditis elegans	6	0	0	0
Q22253	R-CEL-174113	http://www.reactome.org/PathwayBrowser/#/R-CEL-174113	SCF-beta-TrCP mediated degradation of Emi1	IEA	Caenorhabditis elegans	12	0	0	0
Q23237	R-CEL-174113	http://www.reactome.org/PathwayBrowser/#/R-CEL-174113	SCF-beta-TrCP mediated degradation of Emi1	IEA	Caenorhabditis elegans	12	0	0	0
Q23449	R-CEL-174113	http://www.reactome.org/PathwayBrowser/#/R-CEL-174113	SCF-beta-TrCP mediated degradation of Emi1	IEA	Caenorhabditis elegans	12	0	0	0
Q27488	R-CEL-174113	http://www.reactome.org/PathwayBrowser/#/R-CEL-174113	SCF-beta-TrCP mediated degradation of Emi1	IEA	Caenorhabditis elegans	12	0	0	0
Q8MXF1	R-CEL-174113	http://www.reactome.org/PathwayBrowser/#/R-CEL-174113	SCF-beta-TrCP mediated degradation of Emi1	IEA	Caenorhabditis elegans	12	0	0	0
Q8WSN2	R-CEL-174113	http://www.reactome.org/PathwayBrowser/#/R-CEL-174113	SCF-beta-TrCP mediated degradation of Emi1	IEA	Caenorhabditis elegans	6	0	0	0
Q8WSZ5	R-CEL-174113	http://www.reactome.org/PathwayBrowser/#/R-CEL-174113	SCF-beta-TrCP mediated degradation of Emi1	IEA	Caenorhabditis elegans	6	0	0	0
Q8WSZ7	R-CEL-174113	http://www.reactome.org/PathwayBrowser/#/R-CEL-174113	SCF-beta-TrCP mediated degradation of Emi1	IEA	Caenorhabditis elegans	6	0	0	0
Q8WSZ8	R-CEL-174113	http://www.reactome.org/PathwayBrowser/#/R-CEL-174113	SCF-beta-TrCP mediated degradation of Emi1	IEA	Caenorhabditis elegans	6	0	0	0
Q8WSZ9	R-CEL-174113	http://www.reactome.org/PathwayBrowser/#/R-CEL-174113	SCF-beta-TrCP mediated degradation of Emi1	IEA	Caenorhabditis elegans	6	0	0	0
Q95005	R-CEL-174113	http://www.reactome.org/PathwayBrowser/#/R-CEL-174113	SCF-beta-TrCP mediated degradation of Emi1	IEA	Caenorhabditis elegans	12	0	0	0
Q95008	R-CEL-174113	http://www.reactome.org/PathwayBrowser/#/R-CEL-174113	SCF-beta-TrCP mediated degradation of Emi1	IEA	Caenorhabditis elegans	12	0	0	0
Q95PZ7	R-CEL-174113	http://www.reactome.org/PathwayBrowser/#/R-CEL-174113	SCF-beta-TrCP mediated degradation of Emi1	IEA	Caenorhabditis elegans	12	0	0	0
Q966I8	R-CEL-174113	http://www.reactome.org/PathwayBrowser/#/R-CEL-174113	SCF-beta-TrCP mediated degradation of Emi1	IEA	Caenorhabditis elegans	12	0	0	0
Q9GZH5	R-CEL-174113	http://www.reactome.org/PathwayBrowser/#/R-CEL-174113	SCF-beta-TrCP mediated degradation of Emi1	IEA	Caenorhabditis elegans	12	0	0	0
Q9N3U9	R-CEL-174113	http://www.reactome.org/PathwayBrowser/#/R-CEL-174113	SCF-beta-TrCP mediated degradation of Emi1	IEA	Caenorhabditis elegans	6	0	0	0
Q9N599	R-CEL-174113	http://www.reactome.org/PathwayBrowser/#/R-CEL-174113	SCF-beta-TrCP mediated degradation of Emi1	IEA	Caenorhabditis elegans	12	0	0	0
Q9TZ65	R-CEL-174113	http://www.reactome.org/PathwayBrowser/#/R-CEL-174113	SCF-beta-TrCP mediated degradation of Emi1	IEA	Caenorhabditis elegans	12	0	0	0
Q9U1Y9	R-CEL-174113	http://www.reactome.org/PathwayBrowser/#/R-CEL-174113	SCF-beta-TrCP mediated degradation of Emi1	IEA	Caenorhabditis elegans	6	0	0	0
Q9U2N1	R-CEL-174113	http://www.reactome.org/PathwayBrowser/#/R-CEL-174113	SCF-beta-TrCP mediated degradation of Emi1	IEA	Caenorhabditis elegans	6	0	0	0
Q9XTT9	R-CEL-174113	http://www.reactome.org/PathwayBrowser/#/R-CEL-174113	SCF-beta-TrCP mediated degradation of Emi1	IEA	Caenorhabditis elegans	12	0	0	0
Q9XU27	R-CEL-174113	http://www.reactome.org/PathwayBrowser/#/R-CEL-174113	SCF-beta-TrCP mediated degradation of Emi1	IEA	Caenorhabditis elegans	6	0	0	0
Q9XUT3	R-CEL-174113	http://www.reactome.org/PathwayBrowser/#/R-CEL-174113	SCF-beta-TrCP mediated degradation of Emi1	IEA	Caenorhabditis elegans	51	0	0	0
Q9XUV0	R-CEL-174113	http://www.reactome.org/PathwayBrowser/#/R-CEL-174113	SCF-beta-TrCP mediated degradation of Emi1	IEA	Caenorhabditis elegans	12	0	0	0
A0A061AE05	R-CEL-174362	http://www.reactome.org/PathwayBrowser/#/R-CEL-174362	Transport and synthesis of PAPS	IEA	Caenorhabditis elegans	2	0	0	0
A0A061AE05	R-CEL-174362	http://www.reactome.org/PathwayBrowser/#/R-CEL-174362	Transport and synthesis of PAPS	IEA	Caenorhabditis elegans	2	0	0	0
F5GUB2	R-CEL-174362	http://www.reactome.org/PathwayBrowser/#/R-CEL-174362	Transport and synthesis of PAPS	IEA	Caenorhabditis elegans	3	0	0	0
F5GUB2	R-CEL-174362	http://www.reactome.org/PathwayBrowser/#/R-CEL-174362	Transport and synthesis of PAPS	IEA	Caenorhabditis elegans	3	0	0	0
G5EC30	R-CEL-174362	http://www.reactome.org/PathwayBrowser/#/R-CEL-174362	Transport and synthesis of PAPS	IEA	Caenorhabditis elegans	3	0	0	0
G5EC30	R-CEL-174362	http://www.reactome.org/PathwayBrowser/#/R-CEL-174362	Transport and synthesis of PAPS	IEA	Caenorhabditis elegans	3	0	0	0
G5EE27	R-CEL-174362	http://www.reactome.org/PathwayBrowser/#/R-CEL-174362	Transport and synthesis of PAPS	IEA	Caenorhabditis elegans	3	0	0	0
G5EE27	R-CEL-174362	http://www.reactome.org/PathwayBrowser/#/R-CEL-174362	Transport and synthesis of PAPS	IEA	Caenorhabditis elegans	3	0	0	0
G5EEA7	R-CEL-174362	http://www.reactome.org/PathwayBrowser/#/R-CEL-174362	Transport and synthesis of PAPS	IEA	Caenorhabditis elegans	3	0	0	0
G5EEA7	R-CEL-174362	http://www.reactome.org/PathwayBrowser/#/R-CEL-174362	Transport and synthesis of PAPS	IEA	Caenorhabditis elegans	3	0	0	0
G5EFB2	R-CEL-174362	http://www.reactome.org/PathwayBrowser/#/R-CEL-174362	Transport and synthesis of PAPS	IEA	Caenorhabditis elegans	3	0	0	0
G5EFB2	R-CEL-174362	http://www.reactome.org/PathwayBrowser/#/R-CEL-174362	Transport and synthesis of PAPS	IEA	Caenorhabditis elegans	3	0	0	0
G5EFX9	R-CEL-174362	http://www.reactome.org/PathwayBrowser/#/R-CEL-174362	Transport and synthesis of PAPS	IEA	Caenorhabditis elegans	3	0	0	0
G5EFX9	R-CEL-174362	http://www.reactome.org/PathwayBrowser/#/R-CEL-174362	Transport and synthesis of PAPS	IEA	Caenorhabditis elegans	3	0	0	0
G5EGG6	R-CEL-174362	http://www.reactome.org/PathwayBrowser/#/R-CEL-174362	Transport and synthesis of PAPS	IEA	Caenorhabditis elegans	3	0	0	0
G5EGG6	R-CEL-174362	http://www.reactome.org/PathwayBrowser/#/R-CEL-174362	Transport and synthesis of PAPS	IEA	Caenorhabditis elegans	3	0	0	0
O17951	R-CEL-174362	http://www.reactome.org/PathwayBrowser/#/R-CEL-174362	Transport and synthesis of PAPS	IEA	Caenorhabditis elegans	3	0	0	0
O17951	R-CEL-174362	http://www.reactome.org/PathwayBrowser/#/R-CEL-174362	Transport and synthesis of PAPS	IEA	Caenorhabditis elegans	3	0	0	0
O45016	R-CEL-174362	http://www.reactome.org/PathwayBrowser/#/R-CEL-174362	Transport and synthesis of PAPS	IEA	Caenorhabditis elegans	3	0	0	0
O45016	R-CEL-174362	http://www.reactome.org/PathwayBrowser/#/R-CEL-174362	Transport and synthesis of PAPS	IEA	Caenorhabditis elegans	3	0	0	0
Q20787	R-CEL-174362	http://www.reactome.org/PathwayBrowser/#/R-CEL-174362	Transport and synthesis of PAPS	IEA	Caenorhabditis elegans	3	0	0	0
Q20787	R-CEL-174362	http://www.reactome.org/PathwayBrowser/#/R-CEL-174362	Transport and synthesis of PAPS	IEA	Caenorhabditis elegans	3	0	0	0
Q22501	R-CEL-174362	http://www.reactome.org/PathwayBrowser/#/R-CEL-174362	Transport and synthesis of PAPS	IEA	Caenorhabditis elegans	2	0	0	0
Q22501	R-CEL-174362	http://www.reactome.org/PathwayBrowser/#/R-CEL-174362	Transport and synthesis of PAPS	IEA	Caenorhabditis elegans	2	0	0	0
Q3LTR4	R-CEL-174362	http://www.reactome.org/PathwayBrowser/#/R-CEL-174362	Transport and synthesis of PAPS	IEA	Caenorhabditis elegans	3	0	0	0
Q3LTR4	R-CEL-174362	http://www.reactome.org/PathwayBrowser/#/R-CEL-174362	Transport and synthesis of PAPS	IEA	Caenorhabditis elegans	3	0	0	0
Q58QG2	R-CEL-174362	http://www.reactome.org/PathwayBrowser/#/R-CEL-174362	Transport and synthesis of PAPS	IEA	Caenorhabditis elegans	3	0	0	0
Q58QG2	R-CEL-174362	http://www.reactome.org/PathwayBrowser/#/R-CEL-174362	Transport and synthesis of PAPS	IEA	Caenorhabditis elegans	3	0	0	0
Q58QG3	R-CEL-174362	http://www.reactome.org/PathwayBrowser/#/R-CEL-174362	Transport and synthesis of PAPS	IEA	Caenorhabditis elegans	3	0	0	0
Q58QG3	R-CEL-174362	http://www.reactome.org/PathwayBrowser/#/R-CEL-174362	Transport and synthesis of PAPS	IEA	Caenorhabditis elegans	3	0	0	0
Q8MXJ9	R-CEL-174362	http://www.reactome.org/PathwayBrowser/#/R-CEL-174362	Transport and synthesis of PAPS	IEA	Caenorhabditis elegans	3	0	0	0
Q8MXJ9	R-CEL-174362	http://www.reactome.org/PathwayBrowser/#/R-CEL-174362	Transport and synthesis of PAPS	IEA	Caenorhabditis elegans	3	0	0	0
Q94225	R-CEL-174362	http://www.reactome.org/PathwayBrowser/#/R-CEL-174362	Transport and synthesis of PAPS	IEA	Caenorhabditis elegans	3	0	0	0
Q94225	R-CEL-174362	http://www.reactome.org/PathwayBrowser/#/R-CEL-174362	Transport and synthesis of PAPS	IEA	Caenorhabditis elegans	3	0	0	0
A0A9S2	R-CEL-174403	http://www.reactome.org/PathwayBrowser/#/R-CEL-174403	Glutathione synthesis and recycling	IEA	Caenorhabditis elegans	1	0	0	0
A9CZN9	R-CEL-174403	http://www.reactome.org/PathwayBrowser/#/R-CEL-174403	Glutathione synthesis and recycling	IEA	Caenorhabditis elegans	2	0	0	0
O18000	R-CEL-174403	http://www.reactome.org/PathwayBrowser/#/R-CEL-174403	Glutathione synthesis and recycling	IEA	Caenorhabditis elegans	2	0	0	0
Q18596	R-CEL-174403	http://www.reactome.org/PathwayBrowser/#/R-CEL-174403	Glutathione synthesis and recycling	IEA	Caenorhabditis elegans	1	0	0	0
Q20117	R-CEL-174403	http://www.reactome.org/PathwayBrowser/#/R-CEL-174403	Glutathione synthesis and recycling	IEA	Caenorhabditis elegans	2	0	0	0
Q21549	R-CEL-174403	http://www.reactome.org/PathwayBrowser/#/R-CEL-174403	Glutathione synthesis and recycling	IEA	Caenorhabditis elegans	1	0	0	0
Q86FM9	R-CEL-174403	http://www.reactome.org/PathwayBrowser/#/R-CEL-174403	Glutathione synthesis and recycling	IEA	Caenorhabditis elegans	1	0	0	0
Q966L2	R-CEL-174403	http://www.reactome.org/PathwayBrowser/#/R-CEL-174403	Glutathione synthesis and recycling	IEA	Caenorhabditis elegans	2	0	0	0
Q9BL46	R-CEL-174403	http://www.reactome.org/PathwayBrowser/#/R-CEL-174403	Glutathione synthesis and recycling	IEA	Caenorhabditis elegans	2	0	0	0
Q9GZE8	R-CEL-174403	http://www.reactome.org/PathwayBrowser/#/R-CEL-174403	Glutathione synthesis and recycling	IEA	Caenorhabditis elegans	1	0	0	0
U4PMK1	R-CEL-174403	http://www.reactome.org/PathwayBrowser/#/R-CEL-174403	Glutathione synthesis and recycling	IEA	Caenorhabditis elegans	1	0	0	0
C7IVS4	R-CEL-174411	http://www.reactome.org/PathwayBrowser/#/R-CEL-174411	Polymerase switching on the C-strand of the telomere	IEA	Caenorhabditis elegans	11	0	0	0
O02115	R-CEL-174411	http://www.reactome.org/PathwayBrowser/#/R-CEL-174411	Polymerase switching on the C-strand of the telomere	IEA	Caenorhabditis elegans	15	0	0	0
O02334	R-CEL-174411	http://www.reactome.org/PathwayBrowser/#/R-CEL-174411	Polymerase switching on the C-strand of the telomere	IEA	Caenorhabditis elegans	9	0	0	0
O44175	R-CEL-174411	http://www.reactome.org/PathwayBrowser/#/R-CEL-174411	Polymerase switching on the C-strand of the telomere	IEA	Caenorhabditis elegans	9	0	0	0
P34429	R-CEL-174411	http://www.reactome.org/PathwayBrowser/#/R-CEL-174411	Polymerase switching on the C-strand of the telomere	IEA	Caenorhabditis elegans	9	0	0	0
P34471	R-CEL-174411	http://www.reactome.org/PathwayBrowser/#/R-CEL-174411	Polymerase switching on the C-strand of the telomere	IEA	Caenorhabditis elegans	9	0	0	0
P53016	R-CEL-174411	http://www.reactome.org/PathwayBrowser/#/R-CEL-174411	Polymerase switching on the C-strand of the telomere	IEA	Caenorhabditis elegans	9	0	0	0
Q18547	R-CEL-174411	http://www.reactome.org/PathwayBrowser/#/R-CEL-174411	Polymerase switching on the C-strand of the telomere	IEA	Caenorhabditis elegans	9	0	0	0
Q18841	R-CEL-174411	http://www.reactome.org/PathwayBrowser/#/R-CEL-174411	Polymerase switching on the C-strand of the telomere	IEA	Caenorhabditis elegans	8	0	0	0
Q21625	R-CEL-174411	http://www.reactome.org/PathwayBrowser/#/R-CEL-174411	Polymerase switching on the C-strand of the telomere	IEA	Caenorhabditis elegans	9	0	0	0
Q9NAH1	R-CEL-174411	http://www.reactome.org/PathwayBrowser/#/R-CEL-174411	Polymerase switching on the C-strand of the telomere	IEA	Caenorhabditis elegans	11	0	0	0
Q9TZ34	R-CEL-174411	http://www.reactome.org/PathwayBrowser/#/R-CEL-174411	Polymerase switching on the C-strand of the telomere	IEA	Caenorhabditis elegans	9	0	0	0
C7IVS4	R-CEL-174430	http://www.reactome.org/PathwayBrowser/#/R-CEL-174430	Telomere C-strand synthesis initiation	IEA	Caenorhabditis elegans	11	0	0	0
O02334	R-CEL-174430	http://www.reactome.org/PathwayBrowser/#/R-CEL-174430	Telomere C-strand synthesis initiation	IEA	Caenorhabditis elegans	9	0	0	0
O62218	R-CEL-174430	http://www.reactome.org/PathwayBrowser/#/R-CEL-174430	Telomere C-strand synthesis initiation	IEA	Caenorhabditis elegans	4	0	0	0
P34471	R-CEL-174430	http://www.reactome.org/PathwayBrowser/#/R-CEL-174430	Telomere C-strand synthesis initiation	IEA	Caenorhabditis elegans	9	0	0	0
Q19196	R-CEL-174430	http://www.reactome.org/PathwayBrowser/#/R-CEL-174430	Telomere C-strand synthesis initiation	IEA	Caenorhabditis elegans	4	0	0	0
Q21625	R-CEL-174430	http://www.reactome.org/PathwayBrowser/#/R-CEL-174430	Telomere C-strand synthesis initiation	IEA	Caenorhabditis elegans	9	0	0	0
Q9NAH1	R-CEL-174430	http://www.reactome.org/PathwayBrowser/#/R-CEL-174430	Telomere C-strand synthesis initiation	IEA	Caenorhabditis elegans	11	0	0	0
Q9TZ34	R-CEL-174430	http://www.reactome.org/PathwayBrowser/#/R-CEL-174430	Telomere C-strand synthesis initiation	IEA	Caenorhabditis elegans	9	0	0	0
G5EC44	R-CEL-176187	http://www.reactome.org/PathwayBrowser/#/R-CEL-176187	Activation of ATR in response to replication stress	IEA	Caenorhabditis elegans	1	0	0	0
G5EFI9	R-CEL-176187	http://www.reactome.org/PathwayBrowser/#/R-CEL-176187	Activation of ATR in response to replication stress	IEA	Caenorhabditis elegans	1	0	0	0
G5EGG2	R-CEL-176187	http://www.reactome.org/PathwayBrowser/#/R-CEL-176187	Activation of ATR in response to replication stress	IEA	Caenorhabditis elegans	1	0	0	0
H2KZK0	R-CEL-176187	http://www.reactome.org/PathwayBrowser/#/R-CEL-176187	Activation of ATR in response to replication stress	IEA	Caenorhabditis elegans	3	0	0	0
H2KZK1	R-CEL-176187	http://www.reactome.org/PathwayBrowser/#/R-CEL-176187	Activation of ATR in response to replication stress	IEA	Caenorhabditis elegans	3	0	0	0
O44175	R-CEL-176187	http://www.reactome.org/PathwayBrowser/#/R-CEL-176187	Activation of ATR in response to replication stress	IEA	Caenorhabditis elegans	9	0	0	0
O44546	R-CEL-176187	http://www.reactome.org/PathwayBrowser/#/R-CEL-176187	Activation of ATR in response to replication stress	IEA	Caenorhabditis elegans	3	0	0	0
O44547	R-CEL-176187	http://www.reactome.org/PathwayBrowser/#/R-CEL-176187	Activation of ATR in response to replication stress	IEA	Caenorhabditis elegans	3	0	0	0
O44552	R-CEL-176187	http://www.reactome.org/PathwayBrowser/#/R-CEL-176187	Activation of ATR in response to replication stress	IEA	Caenorhabditis elegans	11	0	0	0
O44628	R-CEL-176187	http://www.reactome.org/PathwayBrowser/#/R-CEL-176187	Activation of ATR in response to replication stress	IEA	Caenorhabditis elegans	11	0	0	0
P30634	R-CEL-176187	http://www.reactome.org/PathwayBrowser/#/R-CEL-176187	Activation of ATR in response to replication stress	IEA	Caenorhabditis elegans	11	0	0	0
P34429	R-CEL-176187	http://www.reactome.org/PathwayBrowser/#/R-CEL-176187	Activation of ATR in response to replication stress	IEA	Caenorhabditis elegans	9	0	0	0
P53016	R-CEL-176187	http://www.reactome.org/PathwayBrowser/#/R-CEL-176187	Activation of ATR in response to replication stress	IEA	Caenorhabditis elegans	9	0	0	0
Q18547	R-CEL-176187	http://www.reactome.org/PathwayBrowser/#/R-CEL-176187	Activation of ATR in response to replication stress	IEA	Caenorhabditis elegans	9	0	0	0
Q19537	R-CEL-176187	http://www.reactome.org/PathwayBrowser/#/R-CEL-176187	Activation of ATR in response to replication stress	IEA	Caenorhabditis elegans	8	0	0	0
Q21762	R-CEL-176187	http://www.reactome.org/PathwayBrowser/#/R-CEL-176187	Activation of ATR in response to replication stress	IEA	Caenorhabditis elegans	11	0	0	0
Q86S44	R-CEL-176187	http://www.reactome.org/PathwayBrowser/#/R-CEL-176187	Activation of ATR in response to replication stress	IEA	Caenorhabditis elegans	3	0	0	0
Q95Q27	R-CEL-176187	http://www.reactome.org/PathwayBrowser/#/R-CEL-176187	Activation of ATR in response to replication stress	IEA	Caenorhabditis elegans	1	0	0	0
Q965F6	R-CEL-176187	http://www.reactome.org/PathwayBrowser/#/R-CEL-176187	Activation of ATR in response to replication stress	IEA	Caenorhabditis elegans	3	0	0	0
Q9N3Z3	R-CEL-176187	http://www.reactome.org/PathwayBrowser/#/R-CEL-176187	Activation of ATR in response to replication stress	IEA	Caenorhabditis elegans	3	0	0	0
Q9NBJ6	R-CEL-176187	http://www.reactome.org/PathwayBrowser/#/R-CEL-176187	Activation of ATR in response to replication stress	IEA	Caenorhabditis elegans	1	0	0	0
Q9NF25	R-CEL-176187	http://www.reactome.org/PathwayBrowser/#/R-CEL-176187	Activation of ATR in response to replication stress	IEA	Caenorhabditis elegans	3	0	0	0
P81299	R-CEL-176407	http://www.reactome.org/PathwayBrowser/#/R-CEL-176407	Conversion from APC/C:Cdc20 to APC/C:Cdh1 in late anaphase	IEA	Caenorhabditis elegans	1	0	0	0
Q09649	R-CEL-176407	http://www.reactome.org/PathwayBrowser/#/R-CEL-176407	Conversion from APC/C:Cdc20 to APC/C:Cdh1 in late anaphase	IEA	Caenorhabditis elegans	3	0	0	0
O45926	R-CEL-176408	http://www.reactome.org/PathwayBrowser/#/R-CEL-176408	Regulation of APC/C activators between G1/S and early anaphase	IEA	Caenorhabditis elegans	7	0	0	0
P34556	R-CEL-176408	http://www.reactome.org/PathwayBrowser/#/R-CEL-176408	Regulation of APC/C activators between G1/S and early anaphase	IEA	Caenorhabditis elegans	10	0	0	0
Q09649	R-CEL-176408	http://www.reactome.org/PathwayBrowser/#/R-CEL-176408	Regulation of APC/C activators between G1/S and early anaphase	IEA	Caenorhabditis elegans	3	0	0	0
Q10653	R-CEL-176408	http://www.reactome.org/PathwayBrowser/#/R-CEL-176408	Regulation of APC/C activators between G1/S and early anaphase	IEA	Caenorhabditis elegans	7	0	0	0
Q9BLB5	R-CEL-176408	http://www.reactome.org/PathwayBrowser/#/R-CEL-176408	Regulation of APC/C activators between G1/S and early anaphase	IEA	Caenorhabditis elegans	7	0	0	0
G5EFK8	R-CEL-179812	http://www.reactome.org/PathwayBrowser/#/R-CEL-179812	GRB2 events in EGFR signaling	IEA	Caenorhabditis elegans	5	0	0	0
P22981	R-CEL-179812	http://www.reactome.org/PathwayBrowser/#/R-CEL-179812	GRB2 events in EGFR signaling	IEA	Caenorhabditis elegans	19	0	0	0
P29355	R-CEL-179812	http://www.reactome.org/PathwayBrowser/#/R-CEL-179812	GRB2 events in EGFR signaling	IEA	Caenorhabditis elegans	19	0	0	0
Q9N5D3	R-CEL-179812	http://www.reactome.org/PathwayBrowser/#/R-CEL-179812	GRB2 events in EGFR signaling	IEA	Caenorhabditis elegans	18	0	0	0
Q9NBD3	R-CEL-179812	http://www.reactome.org/PathwayBrowser/#/R-CEL-179812	GRB2 events in EGFR signaling	IEA	Caenorhabditis elegans	18	0	0	0
A3QMC5	R-CEL-1799339	http://www.reactome.org/PathwayBrowser/#/R-CEL-1799339	SRP-dependent cotranslational protein targeting to membrane	IEA	Caenorhabditis elegans	6	0	0	0
A8WIR1	R-CEL-1799339	http://www.reactome.org/PathwayBrowser/#/R-CEL-1799339	SRP-dependent cotranslational protein targeting to membrane	IEA	Caenorhabditis elegans	9	0	0	0
B7WN95	R-CEL-1799339	http://www.reactome.org/PathwayBrowser/#/R-CEL-1799339	SRP-dependent cotranslational protein targeting to membrane	IEA	Caenorhabditis elegans	6	0	0	0
D3YT71	R-CEL-1799339	http://www.reactome.org/PathwayBrowser/#/R-CEL-1799339	SRP-dependent cotranslational protein targeting to membrane	IEA	Caenorhabditis elegans	6	0	0	0
G5EE80	R-CEL-1799339	http://www.reactome.org/PathwayBrowser/#/R-CEL-1799339	SRP-dependent cotranslational protein targeting to membrane	IEA	Caenorhabditis elegans	1	0	0	0
I2HAJ2	R-CEL-1799339	http://www.reactome.org/PathwayBrowser/#/R-CEL-1799339	SRP-dependent cotranslational protein targeting to membrane	IEA	Caenorhabditis elegans	6	0	0	0
O01504	R-CEL-1799339	http://www.reactome.org/PathwayBrowser/#/R-CEL-1799339	SRP-dependent cotranslational protein targeting to membrane	IEA	Caenorhabditis elegans	6	0	0	0
O01692	R-CEL-1799339	http://www.reactome.org/PathwayBrowser/#/R-CEL-1799339	SRP-dependent cotranslational protein targeting to membrane	IEA	Caenorhabditis elegans	9	0	0	0
O01802	R-CEL-1799339	http://www.reactome.org/PathwayBrowser/#/R-CEL-1799339	SRP-dependent cotranslational protein targeting to membrane	IEA	Caenorhabditis elegans	6	0	0	0
O01868	R-CEL-1799339	http://www.reactome.org/PathwayBrowser/#/R-CEL-1799339	SRP-dependent cotranslational protein targeting to membrane	IEA	Caenorhabditis elegans	6	0	0	0
O01869	R-CEL-1799339	http://www.reactome.org/PathwayBrowser/#/R-CEL-1799339	SRP-dependent cotranslational protein targeting to membrane	IEA	Caenorhabditis elegans	9	0	0	0
O02056	R-CEL-1799339	http://www.reactome.org/PathwayBrowser/#/R-CEL-1799339	SRP-dependent cotranslational protein targeting to membrane	IEA	Caenorhabditis elegans	6	0	0	0
O02639	R-CEL-1799339	http://www.reactome.org/PathwayBrowser/#/R-CEL-1799339	SRP-dependent cotranslational protein targeting to membrane	IEA	Caenorhabditis elegans	6	0	0	0
O16927	R-CEL-1799339	http://www.reactome.org/PathwayBrowser/#/R-CEL-1799339	SRP-dependent cotranslational protein targeting to membrane	IEA	Caenorhabditis elegans	1	0	0	0
O17218	R-CEL-1799339	http://www.reactome.org/PathwayBrowser/#/R-CEL-1799339	SRP-dependent cotranslational protein targeting to membrane	IEA	Caenorhabditis elegans	9	0	0	0
O17570	R-CEL-1799339	http://www.reactome.org/PathwayBrowser/#/R-CEL-1799339	SRP-dependent cotranslational protein targeting to membrane	IEA	Caenorhabditis elegans	6	0	0	0
O18240	R-CEL-1799339	http://www.reactome.org/PathwayBrowser/#/R-CEL-1799339	SRP-dependent cotranslational protein targeting to membrane	IEA	Caenorhabditis elegans	9	0	0	0
O18650	R-CEL-1799339	http://www.reactome.org/PathwayBrowser/#/R-CEL-1799339	SRP-dependent cotranslational protein targeting to membrane	IEA	Caenorhabditis elegans	9	0	0	0
O44480	R-CEL-1799339	http://www.reactome.org/PathwayBrowser/#/R-CEL-1799339	SRP-dependent cotranslational protein targeting to membrane	IEA	Caenorhabditis elegans	6	0	0	0
O45226	R-CEL-1799339	http://www.reactome.org/PathwayBrowser/#/R-CEL-1799339	SRP-dependent cotranslational protein targeting to membrane	IEA	Caenorhabditis elegans	6	0	0	0
O45499	R-CEL-1799339	http://www.reactome.org/PathwayBrowser/#/R-CEL-1799339	SRP-dependent cotranslational protein targeting to membrane	IEA	Caenorhabditis elegans	9	0	0	0
O45946	R-CEL-1799339	http://www.reactome.org/PathwayBrowser/#/R-CEL-1799339	SRP-dependent cotranslational protein targeting to membrane	IEA	Caenorhabditis elegans	6	0	0	0
O61749	R-CEL-1799339	http://www.reactome.org/PathwayBrowser/#/R-CEL-1799339	SRP-dependent cotranslational protein targeting to membrane	IEA	Caenorhabditis elegans	1	0	0	0
O62388	R-CEL-1799339	http://www.reactome.org/PathwayBrowser/#/R-CEL-1799339	SRP-dependent cotranslational protein targeting to membrane	IEA	Caenorhabditis elegans	6	0	0	0
P34334	R-CEL-1799339	http://www.reactome.org/PathwayBrowser/#/R-CEL-1799339	SRP-dependent cotranslational protein targeting to membrane	IEA	Caenorhabditis elegans	6	0	0	0
P34642	R-CEL-1799339	http://www.reactome.org/PathwayBrowser/#/R-CEL-1799339	SRP-dependent cotranslational protein targeting to membrane	IEA	Caenorhabditis elegans	1	0	0	0
P34662	R-CEL-1799339	http://www.reactome.org/PathwayBrowser/#/R-CEL-1799339	SRP-dependent cotranslational protein targeting to membrane	IEA	Caenorhabditis elegans	6	0	0	0
P37165	R-CEL-1799339	http://www.reactome.org/PathwayBrowser/#/R-CEL-1799339	SRP-dependent cotranslational protein targeting to membrane	IEA	Caenorhabditis elegans	51	0	0	0
P46769	R-CEL-1799339	http://www.reactome.org/PathwayBrowser/#/R-CEL-1799339	SRP-dependent cotranslational protein targeting to membrane	IEA	Caenorhabditis elegans	9	0	0	0
P47991	R-CEL-1799339	http://www.reactome.org/PathwayBrowser/#/R-CEL-1799339	SRP-dependent cotranslational protein targeting to membrane	IEA	Caenorhabditis elegans	6	0	0	0
P48150	R-CEL-1799339	http://www.reactome.org/PathwayBrowser/#/R-CEL-1799339	SRP-dependent cotranslational protein targeting to membrane	IEA	Caenorhabditis elegans	9	0	0	0
P48152	R-CEL-1799339	http://www.reactome.org/PathwayBrowser/#/R-CEL-1799339	SRP-dependent cotranslational protein targeting to membrane	IEA	Caenorhabditis elegans	9	0	0	0
P48154	R-CEL-1799339	http://www.reactome.org/PathwayBrowser/#/R-CEL-1799339	SRP-dependent cotranslational protein targeting to membrane	IEA	Caenorhabditis elegans	9	0	0	0
P48156	R-CEL-1799339	http://www.reactome.org/PathwayBrowser/#/R-CEL-1799339	SRP-dependent cotranslational protein targeting to membrane	IEA	Caenorhabditis elegans	9	0	0	0
P48158	R-CEL-1799339	http://www.reactome.org/PathwayBrowser/#/R-CEL-1799339	SRP-dependent cotranslational protein targeting to membrane	IEA	Caenorhabditis elegans	6	0	0	0
P48162	R-CEL-1799339	http://www.reactome.org/PathwayBrowser/#/R-CEL-1799339	SRP-dependent cotranslational protein targeting to membrane	IEA	Caenorhabditis elegans	6	0	0	0
P48166	R-CEL-1799339	http://www.reactome.org/PathwayBrowser/#/R-CEL-1799339	SRP-dependent cotranslational protein targeting to membrane	IEA	Caenorhabditis elegans	6	0	0	0
P49041	R-CEL-1799339	http://www.reactome.org/PathwayBrowser/#/R-CEL-1799339	SRP-dependent cotranslational protein targeting to membrane	IEA	Caenorhabditis elegans	9	0	0	0
P49180	R-CEL-1799339	http://www.reactome.org/PathwayBrowser/#/R-CEL-1799339	SRP-dependent cotranslational protein targeting to membrane	IEA	Caenorhabditis elegans	6	0	0	0
P49181	R-CEL-1799339	http://www.reactome.org/PathwayBrowser/#/R-CEL-1799339	SRP-dependent cotranslational protein targeting to membrane	IEA	Caenorhabditis elegans	6	0	0	0
P49196	R-CEL-1799339	http://www.reactome.org/PathwayBrowser/#/R-CEL-1799339	SRP-dependent cotranslational protein targeting to membrane	IEA	Caenorhabditis elegans	9	0	0	0
P49197	R-CEL-1799339	http://www.reactome.org/PathwayBrowser/#/R-CEL-1799339	SRP-dependent cotranslational protein targeting to membrane	IEA	Caenorhabditis elegans	9	0	0	0
P49405	R-CEL-1799339	http://www.reactome.org/PathwayBrowser/#/R-CEL-1799339	SRP-dependent cotranslational protein targeting to membrane	IEA	Caenorhabditis elegans	6	0	0	0
P49622	R-CEL-1799339	http://www.reactome.org/PathwayBrowser/#/R-CEL-1799339	SRP-dependent cotranslational protein targeting to membrane	IEA	Caenorhabditis elegans	6	0	0	0
P49632	R-CEL-1799339	http://www.reactome.org/PathwayBrowser/#/R-CEL-1799339	SRP-dependent cotranslational protein targeting to membrane	IEA	Caenorhabditis elegans	48	0	0	0
P50880	R-CEL-1799339	http://www.reactome.org/PathwayBrowser/#/R-CEL-1799339	SRP-dependent cotranslational protein targeting to membrane	IEA	Caenorhabditis elegans	6	0	0	0
P51403	R-CEL-1799339	http://www.reactome.org/PathwayBrowser/#/R-CEL-1799339	SRP-dependent cotranslational protein targeting to membrane	IEA	Caenorhabditis elegans	9	0	0	0
P51404	R-CEL-1799339	http://www.reactome.org/PathwayBrowser/#/R-CEL-1799339	SRP-dependent cotranslational protein targeting to membrane	IEA	Caenorhabditis elegans	9	0	0	0
P52814	R-CEL-1799339	http://www.reactome.org/PathwayBrowser/#/R-CEL-1799339	SRP-dependent cotranslational protein targeting to membrane	IEA	Caenorhabditis elegans	6	0	0	0
P52819	R-CEL-1799339	http://www.reactome.org/PathwayBrowser/#/R-CEL-1799339	SRP-dependent cotranslational protein targeting to membrane	IEA	Caenorhabditis elegans	6	0	0	0
P52821	R-CEL-1799339	http://www.reactome.org/PathwayBrowser/#/R-CEL-1799339	SRP-dependent cotranslational protein targeting to membrane	IEA	Caenorhabditis elegans	9	0	0	0
P61866	R-CEL-1799339	http://www.reactome.org/PathwayBrowser/#/R-CEL-1799339	SRP-dependent cotranslational protein targeting to membrane	IEA	Caenorhabditis elegans	6	0	0	0
P90983	R-CEL-1799339	http://www.reactome.org/PathwayBrowser/#/R-CEL-1799339	SRP-dependent cotranslational protein targeting to membrane	IEA	Caenorhabditis elegans	9	0	0	0
P91128	R-CEL-1799339	http://www.reactome.org/PathwayBrowser/#/R-CEL-1799339	SRP-dependent cotranslational protein targeting to membrane	IEA	Caenorhabditis elegans	6	0	0	0
P91240	R-CEL-1799339	http://www.reactome.org/PathwayBrowser/#/R-CEL-1799339	SRP-dependent cotranslational protein targeting to membrane	IEA	Caenorhabditis elegans	1	0	0	0
P91374	R-CEL-1799339	http://www.reactome.org/PathwayBrowser/#/R-CEL-1799339	SRP-dependent cotranslational protein targeting to membrane	IEA	Caenorhabditis elegans	6	0	0	0
P91913	R-CEL-1799339	http://www.reactome.org/PathwayBrowser/#/R-CEL-1799339	SRP-dependent cotranslational protein targeting to membrane	IEA	Caenorhabditis elegans	6	0	0	0
P91914	R-CEL-1799339	http://www.reactome.org/PathwayBrowser/#/R-CEL-1799339	SRP-dependent cotranslational protein targeting to membrane	IEA	Caenorhabditis elegans	6	0	0	0
Q09533	R-CEL-1799339	http://www.reactome.org/PathwayBrowser/#/R-CEL-1799339	SRP-dependent cotranslational protein targeting to membrane	IEA	Caenorhabditis elegans	6	0	0	0
Q09557	R-CEL-1799339	http://www.reactome.org/PathwayBrowser/#/R-CEL-1799339	SRP-dependent cotranslational protein targeting to membrane	IEA	Caenorhabditis elegans	51	0	0	0
Q18231	R-CEL-1799339	http://www.reactome.org/PathwayBrowser/#/R-CEL-1799339	SRP-dependent cotranslational protein targeting to membrane	IEA	Caenorhabditis elegans	9	0	0	0
Q19162	R-CEL-1799339	http://www.reactome.org/PathwayBrowser/#/R-CEL-1799339	SRP-dependent cotranslational protein targeting to membrane	IEA	Caenorhabditis elegans	6	0	0	0
Q19869	R-CEL-1799339	http://www.reactome.org/PathwayBrowser/#/R-CEL-1799339	SRP-dependent cotranslational protein targeting to membrane	IEA	Caenorhabditis elegans	6	0	0	0
Q19877	R-CEL-1799339	http://www.reactome.org/PathwayBrowser/#/R-CEL-1799339	SRP-dependent cotranslational protein targeting to membrane	IEA	Caenorhabditis elegans	9	0	0	0
Q1XFY9	R-CEL-1799339	http://www.reactome.org/PathwayBrowser/#/R-CEL-1799339	SRP-dependent cotranslational protein targeting to membrane	IEA	Caenorhabditis elegans	9	0	0	0
Q20206	R-CEL-1799339	http://www.reactome.org/PathwayBrowser/#/R-CEL-1799339	SRP-dependent cotranslational protein targeting to membrane	IEA	Caenorhabditis elegans	9	0	0	0
Q20228	R-CEL-1799339	http://www.reactome.org/PathwayBrowser/#/R-CEL-1799339	SRP-dependent cotranslational protein targeting to membrane	IEA	Caenorhabditis elegans	9	0	0	0
Q20647	R-CEL-1799339	http://www.reactome.org/PathwayBrowser/#/R-CEL-1799339	SRP-dependent cotranslational protein targeting to membrane	IEA	Caenorhabditis elegans	6	0	0	0
Q20822	R-CEL-1799339	http://www.reactome.org/PathwayBrowser/#/R-CEL-1799339	SRP-dependent cotranslational protein targeting to membrane	IEA	Caenorhabditis elegans	1	0	0	0
Q22054	R-CEL-1799339	http://www.reactome.org/PathwayBrowser/#/R-CEL-1799339	SRP-dependent cotranslational protein targeting to membrane	IEA	Caenorhabditis elegans	9	0	0	0
Q22716	R-CEL-1799339	http://www.reactome.org/PathwayBrowser/#/R-CEL-1799339	SRP-dependent cotranslational protein targeting to membrane	IEA	Caenorhabditis elegans	6	0	0	0
Q23312	R-CEL-1799339	http://www.reactome.org/PathwayBrowser/#/R-CEL-1799339	SRP-dependent cotranslational protein targeting to membrane	IEA	Caenorhabditis elegans	9	0	0	0
Q27389	R-CEL-1799339	http://www.reactome.org/PathwayBrowser/#/R-CEL-1799339	SRP-dependent cotranslational protein targeting to membrane	IEA	Caenorhabditis elegans	6	0	0	0
Q8MXR8	R-CEL-1799339	http://www.reactome.org/PathwayBrowser/#/R-CEL-1799339	SRP-dependent cotranslational protein targeting to membrane	IEA	Caenorhabditis elegans	6	0	0	0
Q8WQA8	R-CEL-1799339	http://www.reactome.org/PathwayBrowser/#/R-CEL-1799339	SRP-dependent cotranslational protein targeting to membrane	IEA	Caenorhabditis elegans	9	0	0	0
Q93572	R-CEL-1799339	http://www.reactome.org/PathwayBrowser/#/R-CEL-1799339	SRP-dependent cotranslational protein targeting to membrane	IEA	Caenorhabditis elegans	6	0	0	0
Q94300	R-CEL-1799339	http://www.reactome.org/PathwayBrowser/#/R-CEL-1799339	SRP-dependent cotranslational protein targeting to membrane	IEA	Caenorhabditis elegans	6	0	0	0
Q95XE4	R-CEL-1799339	http://www.reactome.org/PathwayBrowser/#/R-CEL-1799339	SRP-dependent cotranslational protein targeting to membrane	IEA	Caenorhabditis elegans	6	0	0	0
Q95Y04	R-CEL-1799339	http://www.reactome.org/PathwayBrowser/#/R-CEL-1799339	SRP-dependent cotranslational protein targeting to membrane	IEA	Caenorhabditis elegans	9	0	0	0
Q95Y90	R-CEL-1799339	http://www.reactome.org/PathwayBrowser/#/R-CEL-1799339	SRP-dependent cotranslational protein targeting to membrane	IEA	Caenorhabditis elegans	6	0	0	0
Q966C6	R-CEL-1799339	http://www.reactome.org/PathwayBrowser/#/R-CEL-1799339	SRP-dependent cotranslational protein targeting to membrane	IEA	Caenorhabditis elegans	6	0	0	0
Q9BKU5	R-CEL-1799339	http://www.reactome.org/PathwayBrowser/#/R-CEL-1799339	SRP-dependent cotranslational protein targeting to membrane	IEA	Caenorhabditis elegans	6	0	0	0
Q9BKU6	R-CEL-1799339	http://www.reactome.org/PathwayBrowser/#/R-CEL-1799339	SRP-dependent cotranslational protein targeting to membrane	IEA	Caenorhabditis elegans	6	0	0	0
Q9BL19	R-CEL-1799339	http://www.reactome.org/PathwayBrowser/#/R-CEL-1799339	SRP-dependent cotranslational protein targeting to membrane	IEA	Caenorhabditis elegans	6	0	0	0
Q9N3X2	R-CEL-1799339	http://www.reactome.org/PathwayBrowser/#/R-CEL-1799339	SRP-dependent cotranslational protein targeting to membrane	IEA	Caenorhabditis elegans	9	0	0	0
Q9N4I4	R-CEL-1799339	http://www.reactome.org/PathwayBrowser/#/R-CEL-1799339	SRP-dependent cotranslational protein targeting to membrane	IEA	Caenorhabditis elegans	6	0	0	0
Q9NEN6	R-CEL-1799339	http://www.reactome.org/PathwayBrowser/#/R-CEL-1799339	SRP-dependent cotranslational protein targeting to membrane	IEA	Caenorhabditis elegans	10	0	0	0
Q9TXP0	R-CEL-1799339	http://www.reactome.org/PathwayBrowser/#/R-CEL-1799339	SRP-dependent cotranslational protein targeting to membrane	IEA	Caenorhabditis elegans	9	0	0	0
Q9U1X9	R-CEL-1799339	http://www.reactome.org/PathwayBrowser/#/R-CEL-1799339	SRP-dependent cotranslational protein targeting to membrane	IEA	Caenorhabditis elegans	6	0	0	0
Q9U2A8	R-CEL-1799339	http://www.reactome.org/PathwayBrowser/#/R-CEL-1799339	SRP-dependent cotranslational protein targeting to membrane	IEA	Caenorhabditis elegans	6	0	0	0
Q9U332	R-CEL-1799339	http://www.reactome.org/PathwayBrowser/#/R-CEL-1799339	SRP-dependent cotranslational protein targeting to membrane	IEA	Caenorhabditis elegans	6	0	0	0
Q9XUT3	R-CEL-1799339	http://www.reactome.org/PathwayBrowser/#/R-CEL-1799339	SRP-dependent cotranslational protein targeting to membrane	IEA	Caenorhabditis elegans	51	0	0	0
Q9XVE9	R-CEL-1799339	http://www.reactome.org/PathwayBrowser/#/R-CEL-1799339	SRP-dependent cotranslational protein targeting to membrane	IEA	Caenorhabditis elegans	6	0	0	0
Q9XVF7	R-CEL-1799339	http://www.reactome.org/PathwayBrowser/#/R-CEL-1799339	SRP-dependent cotranslational protein targeting to membrane	IEA	Caenorhabditis elegans	6	0	0	0
Q9XVP0	R-CEL-1799339	http://www.reactome.org/PathwayBrowser/#/R-CEL-1799339	SRP-dependent cotranslational protein targeting to membrane	IEA	Caenorhabditis elegans	9	0	0	0
Q9XWS4	R-CEL-1799339	http://www.reactome.org/PathwayBrowser/#/R-CEL-1799339	SRP-dependent cotranslational protein targeting to membrane	IEA	Caenorhabditis elegans	6	0	0	0
P21137	R-CEL-180024	http://www.reactome.org/PathwayBrowser/#/R-CEL-180024	DARPP-32 events	IEA	Caenorhabditis elegans	11	0	0	0
P30625	R-CEL-180024	http://www.reactome.org/PathwayBrowser/#/R-CEL-180024	DARPP-32 events	IEA	Caenorhabditis elegans	7	0	0	0
Q22000	R-CEL-180024	http://www.reactome.org/PathwayBrowser/#/R-CEL-180024	DARPP-32 events	IEA	Caenorhabditis elegans	2	0	0	0
G5EFK8	R-CEL-180336	http://www.reactome.org/PathwayBrowser/#/R-CEL-180336	SHC1 events in EGFR signaling	IEA	Caenorhabditis elegans	5	0	0	0
H2KZG0	R-CEL-180336	http://www.reactome.org/PathwayBrowser/#/R-CEL-180336	SHC1 events in EGFR signaling	IEA	Caenorhabditis elegans	11	0	0	0
H2KZG1	R-CEL-180336	http://www.reactome.org/PathwayBrowser/#/R-CEL-180336	SHC1 events in EGFR signaling	IEA	Caenorhabditis elegans	11	0	0	0
H2KZG2	R-CEL-180336	http://www.reactome.org/PathwayBrowser/#/R-CEL-180336	SHC1 events in EGFR signaling	IEA	Caenorhabditis elegans	11	0	0	0
P22981	R-CEL-180336	http://www.reactome.org/PathwayBrowser/#/R-CEL-180336	SHC1 events in EGFR signaling	IEA	Caenorhabditis elegans	19	0	0	0
P29355	R-CEL-180336	http://www.reactome.org/PathwayBrowser/#/R-CEL-180336	SHC1 events in EGFR signaling	IEA	Caenorhabditis elegans	19	0	0	0
Q9N5D3	R-CEL-180336	http://www.reactome.org/PathwayBrowser/#/R-CEL-180336	SHC1 events in EGFR signaling	IEA	Caenorhabditis elegans	18	0	0	0
Q9NBD3	R-CEL-180336	http://www.reactome.org/PathwayBrowser/#/R-CEL-180336	SHC1 events in EGFR signaling	IEA	Caenorhabditis elegans	18	0	0	0
Q9TYT3	R-CEL-180336	http://www.reactome.org/PathwayBrowser/#/R-CEL-180336	SHC1 events in EGFR signaling	IEA	Caenorhabditis elegans	11	0	0	0
Q7Z1Q0	R-CEL-181429	http://www.reactome.org/PathwayBrowser/#/R-CEL-181429	Serotonin Neurotransmitter Release Cycle	IEA	Caenorhabditis elegans	4	0	0	0
Q9GNP0	R-CEL-181429	http://www.reactome.org/PathwayBrowser/#/R-CEL-181429	Serotonin Neurotransmitter Release Cycle	IEA	Caenorhabditis elegans	4	0	0	0
Q7Z1Q0	R-CEL-181430	http://www.reactome.org/PathwayBrowser/#/R-CEL-181430	Norepinephrine Neurotransmitter Release Cycle	IEA	Caenorhabditis elegans	4	0	0	0
Q9GNP0	R-CEL-181430	http://www.reactome.org/PathwayBrowser/#/R-CEL-181430	Norepinephrine Neurotransmitter Release Cycle	IEA	Caenorhabditis elegans	4	0	0	0
E3W735	R-CEL-182971	http://www.reactome.org/PathwayBrowser/#/R-CEL-182971	EGFR downregulation	IEA	Caenorhabditis elegans	6	0	0	0
G5EFK8	R-CEL-182971	http://www.reactome.org/PathwayBrowser/#/R-CEL-182971	EGFR downregulation	IEA	Caenorhabditis elegans	5	0	0	0
P29355	R-CEL-182971	http://www.reactome.org/PathwayBrowser/#/R-CEL-182971	EGFR downregulation	IEA	Caenorhabditis elegans	19	0	0	0
P37165	R-CEL-182971	http://www.reactome.org/PathwayBrowser/#/R-CEL-182971	EGFR downregulation	IEA	Caenorhabditis elegans	51	0	0	0
P49632	R-CEL-182971	http://www.reactome.org/PathwayBrowser/#/R-CEL-182971	EGFR downregulation	IEA	Caenorhabditis elegans	48	0	0	0
Q05062	R-CEL-182971	http://www.reactome.org/PathwayBrowser/#/R-CEL-182971	EGFR downregulation	IEA	Caenorhabditis elegans	12	0	0	0
Q09557	R-CEL-182971	http://www.reactome.org/PathwayBrowser/#/R-CEL-182971	EGFR downregulation	IEA	Caenorhabditis elegans	51	0	0	0
Q19019	R-CEL-182971	http://www.reactome.org/PathwayBrowser/#/R-CEL-182971	EGFR downregulation	IEA	Caenorhabditis elegans	6	0	0	0
Q21430	R-CEL-182971	http://www.reactome.org/PathwayBrowser/#/R-CEL-182971	EGFR downregulation	IEA	Caenorhabditis elegans	6	1	0	0
Q6ABG8	R-CEL-182971	http://www.reactome.org/PathwayBrowser/#/R-CEL-182971	EGFR downregulation	IEA	Caenorhabditis elegans	6	0	0	0
Q95ZR5	R-CEL-182971	http://www.reactome.org/PathwayBrowser/#/R-CEL-182971	EGFR downregulation	IEA	Caenorhabditis elegans	6	0	0	0
Q9XUT3	R-CEL-182971	http://www.reactome.org/PathwayBrowser/#/R-CEL-182971	EGFR downregulation	IEA	Caenorhabditis elegans	51	0	0	0
P34476	R-CEL-1834949	http://www.reactome.org/PathwayBrowser/#/R-CEL-1834949	Cytosolic sensors of pathogen-associated DNA	IEA	Caenorhabditis elegans	2	0	0	0
P91529	R-CEL-1834949	http://www.reactome.org/PathwayBrowser/#/R-CEL-1834949	Cytosolic sensors of pathogen-associated DNA	IEA	Caenorhabditis elegans	1	0	0	0
Q0G841	R-CEL-1834949	http://www.reactome.org/PathwayBrowser/#/R-CEL-1834949	Cytosolic sensors of pathogen-associated DNA	IEA	Caenorhabditis elegans	1	0	0	0
Q17684	R-CEL-1834949	http://www.reactome.org/PathwayBrowser/#/R-CEL-1834949	Cytosolic sensors of pathogen-associated DNA	IEA	Caenorhabditis elegans	20	0	0	0
Q18566	R-CEL-1834949	http://www.reactome.org/PathwayBrowser/#/R-CEL-1834949	Cytosolic sensors of pathogen-associated DNA	IEA	Caenorhabditis elegans	1	0	0	0
Q19826	R-CEL-1834949	http://www.reactome.org/PathwayBrowser/#/R-CEL-1834949	Cytosolic sensors of pathogen-associated DNA	IEA	Caenorhabditis elegans	20	0	0	0
Q23206	R-CEL-1834949	http://www.reactome.org/PathwayBrowser/#/R-CEL-1834949	Cytosolic sensors of pathogen-associated DNA	IEA	Caenorhabditis elegans	1	0	0	0
Q23255	R-CEL-1834949	http://www.reactome.org/PathwayBrowser/#/R-CEL-1834949	Cytosolic sensors of pathogen-associated DNA	IEA	Caenorhabditis elegans	4	0	0	0
Q23645	R-CEL-1834949	http://www.reactome.org/PathwayBrowser/#/R-CEL-1834949	Cytosolic sensors of pathogen-associated DNA	IEA	Caenorhabditis elegans	1	0	0	0
Q27492	R-CEL-1834949	http://www.reactome.org/PathwayBrowser/#/R-CEL-1834949	Cytosolic sensors of pathogen-associated DNA	IEA	Caenorhabditis elegans	1	0	0	0
Q8IG67	R-CEL-1834949	http://www.reactome.org/PathwayBrowser/#/R-CEL-1834949	Cytosolic sensors of pathogen-associated DNA	IEA	Caenorhabditis elegans	1	0	0	0
Q9GR61	R-CEL-1834949	http://www.reactome.org/PathwayBrowser/#/R-CEL-1834949	Cytosolic sensors of pathogen-associated DNA	IEA	Caenorhabditis elegans	20	0	0	0
Q9N4B7	R-CEL-1834949	http://www.reactome.org/PathwayBrowser/#/R-CEL-1834949	Cytosolic sensors of pathogen-associated DNA	IEA	Caenorhabditis elegans	1	0	0	0
Q9N5K2	R-CEL-1834949	http://www.reactome.org/PathwayBrowser/#/R-CEL-1834949	Cytosolic sensors of pathogen-associated DNA	IEA	Caenorhabditis elegans	20	0	0	0
Q9U3I0	R-CEL-1834949	http://www.reactome.org/PathwayBrowser/#/R-CEL-1834949	Cytosolic sensors of pathogen-associated DNA	IEA	Caenorhabditis elegans	20	0	0	0
Q9UAY9	R-CEL-1834949	http://www.reactome.org/PathwayBrowser/#/R-CEL-1834949	Cytosolic sensors of pathogen-associated DNA	IEA	Caenorhabditis elegans	2	0	0	0
U4PMG8	R-CEL-1834949	http://www.reactome.org/PathwayBrowser/#/R-CEL-1834949	Cytosolic sensors of pathogen-associated DNA	IEA	Caenorhabditis elegans	1	0	0	0
X5M5N4	R-CEL-1834949	http://www.reactome.org/PathwayBrowser/#/R-CEL-1834949	Cytosolic sensors of pathogen-associated DNA	IEA	Caenorhabditis elegans	20	0	0	0
O02167	R-CEL-1855167	http://www.reactome.org/PathwayBrowser/#/R-CEL-1855167	Synthesis of pyrophosphates in the cytosol	IEA	Caenorhabditis elegans	2	1	0	0
P91309	R-CEL-1855167	http://www.reactome.org/PathwayBrowser/#/R-CEL-1855167	Synthesis of pyrophosphates in the cytosol	IEA	Caenorhabditis elegans	1	0	0	0
Q93644	R-CEL-1855167	http://www.reactome.org/PathwayBrowser/#/R-CEL-1855167	Synthesis of pyrophosphates in the cytosol	IEA	Caenorhabditis elegans	2	0	0	0
Q95XC4	R-CEL-1855167	http://www.reactome.org/PathwayBrowser/#/R-CEL-1855167	Synthesis of pyrophosphates in the cytosol	IEA	Caenorhabditis elegans	1	0	0	0
Q9BKX8	R-CEL-1855167	http://www.reactome.org/PathwayBrowser/#/R-CEL-1855167	Synthesis of pyrophosphates in the cytosol	IEA	Caenorhabditis elegans	2	0	0	0
A5Z2U3	R-CEL-1855183	http://www.reactome.org/PathwayBrowser/#/R-CEL-1855183	Synthesis of IP2, IP, and Ins in the cytosol	IEA	Caenorhabditis elegans	4	0	0	0
B3CJ53	R-CEL-1855183	http://www.reactome.org/PathwayBrowser/#/R-CEL-1855183	Synthesis of IP2, IP, and Ins in the cytosol	IEA	Caenorhabditis elegans	3	0	0	0
G5ECL2	R-CEL-1855183	http://www.reactome.org/PathwayBrowser/#/R-CEL-1855183	Synthesis of IP2, IP, and Ins in the cytosol	IEA	Caenorhabditis elegans	3	0	0	0
G5ED01	R-CEL-1855183	http://www.reactome.org/PathwayBrowser/#/R-CEL-1855183	Synthesis of IP2, IP, and Ins in the cytosol	IEA	Caenorhabditis elegans	1	0	0	0
G5EDR8	R-CEL-1855183	http://www.reactome.org/PathwayBrowser/#/R-CEL-1855183	Synthesis of IP2, IP, and Ins in the cytosol	IEA	Caenorhabditis elegans	3	0	0	0
G5EEJ9	R-CEL-1855183	http://www.reactome.org/PathwayBrowser/#/R-CEL-1855183	Synthesis of IP2, IP, and Ins in the cytosol	IEA	Caenorhabditis elegans	3	0	0	0
O17590	R-CEL-1855183	http://www.reactome.org/PathwayBrowser/#/R-CEL-1855183	Synthesis of IP2, IP, and Ins in the cytosol	IEA	Caenorhabditis elegans	4	0	0	0
P34370	R-CEL-1855183	http://www.reactome.org/PathwayBrowser/#/R-CEL-1855183	Synthesis of IP2, IP, and Ins in the cytosol	IEA	Caenorhabditis elegans	3	1	0	0
Q17543	R-CEL-1855183	http://www.reactome.org/PathwayBrowser/#/R-CEL-1855183	Synthesis of IP2, IP, and Ins in the cytosol	IEA	Caenorhabditis elegans	1	0	0	0
Q17848	R-CEL-1855183	http://www.reactome.org/PathwayBrowser/#/R-CEL-1855183	Synthesis of IP2, IP, and Ins in the cytosol	IEA	Caenorhabditis elegans	1	0	0	0
Q19420	R-CEL-1855183	http://www.reactome.org/PathwayBrowser/#/R-CEL-1855183	Synthesis of IP2, IP, and Ins in the cytosol	IEA	Caenorhabditis elegans	1	0	0	0
Q21623	R-CEL-1855183	http://www.reactome.org/PathwayBrowser/#/R-CEL-1855183	Synthesis of IP2, IP, and Ins in the cytosol	IEA	Caenorhabditis elegans	3	0	0	0
Q8MUM1	R-CEL-1855183	http://www.reactome.org/PathwayBrowser/#/R-CEL-1855183	Synthesis of IP2, IP, and Ins in the cytosol	IEA	Caenorhabditis elegans	3	0	0	0
O02167	R-CEL-1855191	http://www.reactome.org/PathwayBrowser/#/R-CEL-1855191	Synthesis of IPs in the nucleus	IEA	Caenorhabditis elegans	2	1	0	0
O62519	R-CEL-1855191	http://www.reactome.org/PathwayBrowser/#/R-CEL-1855191	Synthesis of IPs in the nucleus	IEA	Caenorhabditis elegans	1	0	0	0
Q93644	R-CEL-1855191	http://www.reactome.org/PathwayBrowser/#/R-CEL-1855191	Synthesis of IPs in the nucleus	IEA	Caenorhabditis elegans	2	0	0	0
Q9BKX8	R-CEL-1855191	http://www.reactome.org/PathwayBrowser/#/R-CEL-1855191	Synthesis of IPs in the nucleus	IEA	Caenorhabditis elegans	2	0	0	0
A5Z2U3	R-CEL-1855204	http://www.reactome.org/PathwayBrowser/#/R-CEL-1855204	Synthesis of IP3 and IP4 in the cytosol	IEA	Caenorhabditis elegans	4	0	0	0
A6PVA4	R-CEL-1855204	http://www.reactome.org/PathwayBrowser/#/R-CEL-1855204	Synthesis of IP3 and IP4 in the cytosol	IEA	Caenorhabditis elegans	1	0	0	0
B3CJ53	R-CEL-1855204	http://www.reactome.org/PathwayBrowser/#/R-CEL-1855204	Synthesis of IP3 and IP4 in the cytosol	IEA	Caenorhabditis elegans	3	0	0	0
G5EBH0	R-CEL-1855204	http://www.reactome.org/PathwayBrowser/#/R-CEL-1855204	Synthesis of IP3 and IP4 in the cytosol	IEA	Caenorhabditis elegans	4	0	0	0
G5ECL2	R-CEL-1855204	http://www.reactome.org/PathwayBrowser/#/R-CEL-1855204	Synthesis of IP3 and IP4 in the cytosol	IEA	Caenorhabditis elegans	3	0	0	0
G5ED55	R-CEL-1855204	http://www.reactome.org/PathwayBrowser/#/R-CEL-1855204	Synthesis of IP3 and IP4 in the cytosol	IEA	Caenorhabditis elegans	1	0	0	0
G5EDR8	R-CEL-1855204	http://www.reactome.org/PathwayBrowser/#/R-CEL-1855204	Synthesis of IP3 and IP4 in the cytosol	IEA	Caenorhabditis elegans	3	0	0	0
G5EE01	R-CEL-1855204	http://www.reactome.org/PathwayBrowser/#/R-CEL-1855204	Synthesis of IP3 and IP4 in the cytosol	IEA	Caenorhabditis elegans	4	0	0	0
G5EEI0	R-CEL-1855204	http://www.reactome.org/PathwayBrowser/#/R-CEL-1855204	Synthesis of IP3 and IP4 in the cytosol	IEA	Caenorhabditis elegans	1	0	0	0
G5EEJ6	R-CEL-1855204	http://www.reactome.org/PathwayBrowser/#/R-CEL-1855204	Synthesis of IP3 and IP4 in the cytosol	IEA	Caenorhabditis elegans	1	0	0	0
G5EEJ9	R-CEL-1855204	http://www.reactome.org/PathwayBrowser/#/R-CEL-1855204	Synthesis of IP3 and IP4 in the cytosol	IEA	Caenorhabditis elegans	3	0	0	0
G5EFG8	R-CEL-1855204	http://www.reactome.org/PathwayBrowser/#/R-CEL-1855204	Synthesis of IP3 and IP4 in the cytosol	IEA	Caenorhabditis elegans	1	0	0	0
G5EFI5	R-CEL-1855204	http://www.reactome.org/PathwayBrowser/#/R-CEL-1855204	Synthesis of IP3 and IP4 in the cytosol	IEA	Caenorhabditis elegans	1	0	0	0
G5EFI8	R-CEL-1855204	http://www.reactome.org/PathwayBrowser/#/R-CEL-1855204	Synthesis of IP3 and IP4 in the cytosol	IEA	Caenorhabditis elegans	1	0	0	0
H2KZ05	R-CEL-1855204	http://www.reactome.org/PathwayBrowser/#/R-CEL-1855204	Synthesis of IP3 and IP4 in the cytosol	IEA	Caenorhabditis elegans	1	0	0	0
H2KZ42	R-CEL-1855204	http://www.reactome.org/PathwayBrowser/#/R-CEL-1855204	Synthesis of IP3 and IP4 in the cytosol	IEA	Caenorhabditis elegans	1	0	0	0
H2KZ43	R-CEL-1855204	http://www.reactome.org/PathwayBrowser/#/R-CEL-1855204	Synthesis of IP3 and IP4 in the cytosol	IEA	Caenorhabditis elegans	1	0	0	0
H2KZ45	R-CEL-1855204	http://www.reactome.org/PathwayBrowser/#/R-CEL-1855204	Synthesis of IP3 and IP4 in the cytosol	IEA	Caenorhabditis elegans	1	0	0	0
H2KZ46	R-CEL-1855204	http://www.reactome.org/PathwayBrowser/#/R-CEL-1855204	Synthesis of IP3 and IP4 in the cytosol	IEA	Caenorhabditis elegans	1	0	0	0
H2KZ47	R-CEL-1855204	http://www.reactome.org/PathwayBrowser/#/R-CEL-1855204	Synthesis of IP3 and IP4 in the cytosol	IEA	Caenorhabditis elegans	1	0	0	0
O16305	R-CEL-1855204	http://www.reactome.org/PathwayBrowser/#/R-CEL-1855204	Synthesis of IP3 and IP4 in the cytosol	IEA	Caenorhabditis elegans	22	0	0	0
O17590	R-CEL-1855204	http://www.reactome.org/PathwayBrowser/#/R-CEL-1855204	Synthesis of IP3 and IP4 in the cytosol	IEA	Caenorhabditis elegans	4	0	0	0
O45049	R-CEL-1855204	http://www.reactome.org/PathwayBrowser/#/R-CEL-1855204	Synthesis of IP3 and IP4 in the cytosol	IEA	Caenorhabditis elegans	1	0	0	0
O45050	R-CEL-1855204	http://www.reactome.org/PathwayBrowser/#/R-CEL-1855204	Synthesis of IP3 and IP4 in the cytosol	IEA	Caenorhabditis elegans	1	0	0	0
O45051	R-CEL-1855204	http://www.reactome.org/PathwayBrowser/#/R-CEL-1855204	Synthesis of IP3 and IP4 in the cytosol	IEA	Caenorhabditis elegans	1	0	0	0
P34370	R-CEL-1855204	http://www.reactome.org/PathwayBrowser/#/R-CEL-1855204	Synthesis of IP3 and IP4 in the cytosol	IEA	Caenorhabditis elegans	3	1	0	0
Q19056	R-CEL-1855204	http://www.reactome.org/PathwayBrowser/#/R-CEL-1855204	Synthesis of IP3 and IP4 in the cytosol	IEA	Caenorhabditis elegans	1	0	0	0
Q21754	R-CEL-1855204	http://www.reactome.org/PathwayBrowser/#/R-CEL-1855204	Synthesis of IP3 and IP4 in the cytosol	IEA	Caenorhabditis elegans	1	0	0	0
[truncated: 8,381 more rows]

## Sheet: DEG-mapped pathways
							NQ	NTO	DNAN		NQ-affected pathways					165	328		NTO-affected pathways					22	41		DNAN-affected pathways					30	167
UniProt ID	Reactome pathway ID	Reactome pathway web link	Reactome pathway name		Organism	10	328	41	167		Frequency	UniProt ID	Reactome pathway ID	Web link	Pathway name	sort by pathID	No. genes/pathway		Frequency	UniProt ID	Reactome pathway ID	Web link	Pathway name	sort by pathID	No. genes/pathway		Frequency	UniProt ID	Reactome pathway ID	Web link	Pathway name	sort by pathID	No. genes/pathway
Q9XX44	R-CEL-352230	http://www.reactome.org/PathwayBrowser/#/R-CEL-352230	Amino acid transport across the plasma membrane	IEA	Caenorhabditis elegans	2	0	1	1		1	P91442	R-CEL-114608	http://www.reactome.org/PathwayBrowser/#/R-CEL-114608	Platelet degranulation	1	1		10	O44650	R-CEL-156581	http://www.reactome.org/PathwayBrowser/#/R-CEL-156581	Methylation	1	2		10	O45364	R-CEL-156581	http://www.reactome.org/PathwayBrowser/#/R-CEL-156581	Methylation	1	15
Q27515	R-CEL-211979	http://www.reactome.org/PathwayBrowser/#/R-CEL-211979	Eicosanoids	IEA	Caenorhabditis elegans	2	0	1	1		4	Q20935	R-CEL-1169408	http://www.reactome.org/PathwayBrowser/#/R-CEL-1169408	ISG15 antiviral mechanism	1	1		10	Q27470	R-CEL-156581	http://www.reactome.org/PathwayBrowser/#/R-CEL-156581	Methylation	0			10	O62377	R-CEL-156581	http://www.reactome.org/PathwayBrowser/#/R-CEL-156581	Methylation	0
Q27519	R-CEL-211979	http://www.reactome.org/PathwayBrowser/#/R-CEL-211979	Eicosanoids	IEA	Caenorhabditis elegans	2	0	1	1		3	Q27504	R-CEL-1237044	http://www.reactome.org/PathwayBrowser/#/R-CEL-1237044	Erythrocytes take up carbon dioxide and release oxygen	1	1		1	G5ECL9	R-CEL-156590	http://www.reactome.org/PathwayBrowser/#/R-CEL-156590	Glutathione conjugation	1	1		10	O02627	R-CEL-156581	http://www.reactome.org/PathwayBrowser/#/R-CEL-156581	Methylation	0
G5ECL9	R-CEL-156590	http://www.reactome.org/PathwayBrowser/#/R-CEL-156590	Glutathione conjugation	IEA	Caenorhabditis elegans	1	0	1	1		3	Q27504	R-CEL-1247673	http://www.reactome.org/PathwayBrowser/#/R-CEL-1247673	Erythrocytes take up oxygen and release carbon dioxide	1	1		10	O44650	R-CEL-193048	http://www.reactome.org/PathwayBrowser/#/R-CEL-193048	Androgen biosynthesis	1	2		10	O44649	R-CEL-156581	http://www.reactome.org/PathwayBrowser/#/R-CEL-156581	Methylation	0
Q9XX44	R-CEL-428559	http://www.reactome.org/PathwayBrowser/#/R-CEL-428559	Proton-coupled neutral amino acid transporters	IEA	Caenorhabditis elegans	2	0	1	1		1	O17697	R-CEL-1296052	http://www.reactome.org/PathwayBrowser/#/R-CEL-1296052	Ca2+ activated K+ channels	1	1		10	Q27470	R-CEL-193048	http://www.reactome.org/PathwayBrowser/#/R-CEL-193048	Androgen biosynthesis	0			10	Q9N5I1	R-CEL-156581	http://www.reactome.org/PathwayBrowser/#/R-CEL-156581	Methylation	0
Q27515	R-CEL-2162123	http://www.reactome.org/PathwayBrowser/#/R-CEL-2162123	Synthesis of Prostaglandins (PG) and Thromboxanes (TX)	IEA	Caenorhabditis elegans	2	0	1	1		1	G5EG92	R-CEL-1299344	http://www.reactome.org/PathwayBrowser/#/R-CEL-1299344	TWIK-related spinal cord K+ channel (TRESK)	1	3		2	O18030	R-CEL-193144	http://www.reactome.org/PathwayBrowser/#/R-CEL-193144	Estrogen biosynthesis	1	1		10	G5ECD0	R-CEL-156581	http://www.reactome.org/PathwayBrowser/#/R-CEL-156581	Methylation	0
Q27519	R-CEL-2162123	http://www.reactome.org/PathwayBrowser/#/R-CEL-2162123	Synthesis of Prostaglandins (PG) and Thromboxanes (TX)	IEA	Caenorhabditis elegans	2	0	1	1		1	Q22042	R-CEL-1299344	http://www.reactome.org/PathwayBrowser/#/R-CEL-1299344	TWIK-related spinal cord K+ channel (TRESK)	0			10	O44650	R-CEL-193993	http://www.reactome.org/PathwayBrowser/#/R-CEL-193993	Mineralocorticoid biosynthesis	1	2		10	O02628	R-CEL-156581	http://www.reactome.org/PathwayBrowser/#/R-CEL-156581	Methylation	0
O45364	R-CEL-5423646	http://www.reactome.org/PathwayBrowser/#/R-CEL-5423646	Aflatoxin activation and detoxification	IEA	Caenorhabditis elegans	10	1	0	1		1	O45891	R-CEL-1299344	http://www.reactome.org/PathwayBrowser/#/R-CEL-1299344	TWIK-related spinal cord K+ channel (TRESK)	0			10	Q27470	R-CEL-193993	http://www.reactome.org/PathwayBrowser/#/R-CEL-193993	Mineralocorticoid biosynthesis	0			10	O16220	R-CEL-156581	http://www.reactome.org/PathwayBrowser/#/R-CEL-156581	Methylation	0
O62377	R-CEL-5423646	http://www.reactome.org/PathwayBrowser/#/R-CEL-5423646	Aflatoxin activation and detoxification	IEA	Caenorhabditis elegans	10	1	0	1		4	O45730	R-CEL-1369062	http://www.reactome.org/PathwayBrowser/#/R-CEL-1369062	ABC transporters in lipid homeostasis	1	3		10	O44650	R-CEL-194002	http://www.reactome.org/PathwayBrowser/#/R-CEL-194002	Glucocorticoid biosynthesis	1	2		10	O16670	R-CEL-156581	http://www.reactome.org/PathwayBrowser/#/R-CEL-156581	Methylation	0
O45364	R-CEL-193048	http://www.reactome.org/PathwayBrowser/#/R-CEL-193048	Androgen biosynthesis	IEA	Caenorhabditis elegans	10	1	0	1		1	Q18597	R-CEL-1369062	http://www.reactome.org/PathwayBrowser/#/R-CEL-1369062	ABC transporters in lipid homeostasis	0			10	Q27470	R-CEL-194002	http://www.reactome.org/PathwayBrowser/#/R-CEL-194002	Glucocorticoid biosynthesis	0			10	O61204	R-CEL-156581	http://www.reactome.org/PathwayBrowser/#/R-CEL-156581	Methylation	0
O62377	R-CEL-193048	http://www.reactome.org/PathwayBrowser/#/R-CEL-193048	Androgen biosynthesis	IEA	Caenorhabditis elegans	10	1	0	1		1	Q18598	R-CEL-1369062	http://www.reactome.org/PathwayBrowser/#/R-CEL-1369062	ABC transporters in lipid homeostasis	0			10	O44650	R-CEL-211957	http://www.reactome.org/PathwayBrowser/#/R-CEL-211957	Aromatic amines can be N-hydroxylated or N-dealkylated by CYP1A2	1	2		3	P34345	R-CEL-156581	http://www.reactome.org/PathwayBrowser/#/R-CEL-156581	Methylation	0
O45364	R-CEL-211957	http://www.reactome.org/PathwayBrowser/#/R-CEL-211957	Aromatic amines can be N-hydroxylated or N-dealkylated by CYP1A2	IEA	Caenorhabditis elegans	10	1	0	1		2	O16289	R-CEL-1442490	http://www.reactome.org/PathwayBrowser/#/R-CEL-1442490	Collagen degradation	1	6		10	Q27470	R-CEL-211957	http://www.reactome.org/PathwayBrowser/#/R-CEL-211957	Aromatic amines can be N-hydroxylated or N-dealkylated by CYP1A2	0			10	Q27471	R-CEL-156581	http://www.reactome.org/PathwayBrowser/#/R-CEL-156581	Methylation	0
O62377	R-CEL-211957	http://www.reactome.org/PathwayBrowser/#/R-CEL-211957	Aromatic amines can be N-hydroxylated or N-dealkylated by CYP1A2	IEA	Caenorhabditis elegans	10	1	0	1		2	P43507	R-CEL-1442490	http://www.reactome.org/PathwayBrowser/#/R-CEL-1442490	Collagen degradation	0			10	O44650	R-CEL-211976	http://www.reactome.org/PathwayBrowser/#/R-CEL-211976	Endogenous sterols	1	2		10	Q27505	R-CEL-156581	http://www.reactome.org/PathwayBrowser/#/R-CEL-156581	Methylation	0
O45518	R-CEL-71288	http://www.reactome.org/PathwayBrowser/#/R-CEL-71288	Creatine metabolism	IEA	Caenorhabditis elegans	1	1	0	1		2	Q20950	R-CEL-1442490	http://www.reactome.org/PathwayBrowser/#/R-CEL-1442490	Collagen degradation	0			10	Q27470	R-CEL-211976	http://www.reactome.org/PathwayBrowser/#/R-CEL-211976	Endogenous sterols	0			10	Q27506	R-CEL-156581	http://www.reactome.org/PathwayBrowser/#/R-CEL-156581	Methylation	0
O45364	R-CEL-211976	http://www.reactome.org/PathwayBrowser/#/R-CEL-211976	Endogenous sterols	IEA	Caenorhabditis elegans	10	1	0	1		2	P25807	R-CEL-1442490	http://www.reactome.org/PathwayBrowser/#/R-CEL-1442490	Collagen degradation	0			2	Q27513	R-CEL-211979	http://www.reactome.org/PathwayBrowser/#/R-CEL-211979	Eicosanoids	1	4		10	Q27507	R-CEL-156581	http://www.reactome.org/PathwayBrowser/#/R-CEL-156581	Methylation	0
O62377	R-CEL-211976	http://www.reactome.org/PathwayBrowser/#/R-CEL-211976	Endogenous sterols	IEA	Caenorhabditis elegans	10	1	0	1		2	P43508	R-CEL-1442490	http://www.reactome.org/PathwayBrowser/#/R-CEL-1442490	Collagen degradation	0			2	Q27515	R-CEL-211979	http://www.reactome.org/PathwayBrowser/#/R-CEL-211979	Eicosanoids	0			1	G5ECL9	R-CEL-156590	http://www.reactome.org/PathwayBrowser/#/R-CEL-156590	Glutathione conjugation	1	3
G5EBJ9	R-CEL-217271	http://www.reactome.org/PathwayBrowser/#/R-CEL-217271	FMO oxidises nucleophiles	IEA	Caenorhabditis elegans	1	1	0	1		2	P91991	R-CEL-1442490	http://www.reactome.org/PathwayBrowser/#/R-CEL-1442490	Collagen degradation	0			2	Q27519	R-CEL-211979	http://www.reactome.org/PathwayBrowser/#/R-CEL-211979	Eicosanoids	0			2	O61750	R-CEL-156590	http://www.reactome.org/PathwayBrowser/#/R-CEL-156590	Glutathione conjugation	0
O45364	R-CEL-194002	http://www.reactome.org/PathwayBrowser/#/R-CEL-194002	Glucocorticoid biosynthesis	IEA	Caenorhabditis elegans	10	1	0	1		1	Q19980	R-CEL-1474151	http://www.reactome.org/PathwayBrowser/#/R-CEL-1474151	Tetrahydrobiopterin (BH4) synthesis, recycling, salvage and regulation	1	1		2	Q27514	R-CEL-211979	http://www.reactome.org/PathwayBrowser/#/R-CEL-211979	Eicosanoids	0			3	P34345	R-CEL-156590	http://www.reactome.org/PathwayBrowser/#/R-CEL-156590	Glutathione conjugation	0
O62377	R-CEL-194002	http://www.reactome.org/PathwayBrowser/#/R-CEL-194002	Glucocorticoid biosynthesis	IEA	Caenorhabditis elegans	10	1	0	1		7	Q22574	R-CEL-1474228	http://www.reactome.org/PathwayBrowser/#/R-CEL-1474228	Degradation of the extracellular matrix	1	1		10	O44650	R-CEL-211981	http://www.reactome.org/PathwayBrowser/#/R-CEL-211981	Xenobiotics	1	2		1	O01893	R-CEL-1660662	http://www.reactome.org/PathwayBrowser/#/R-CEL-1660662	Glycosphingolipid metabolism	1	1
Q18898	R-CEL-6811438	http://www.reactome.org/PathwayBrowser/#/R-CEL-6811438	Intra-Golgi traffic	IEA	Caenorhabditis elegans	1	1	0	1		3	Q27504	R-CEL-1475029	http://www.reactome.org/PathwayBrowser/#/R-CEL-1475029	Reversible hydration of carbon dioxide	1	1		10	Q27470	R-CEL-211981	http://www.reactome.org/PathwayBrowser/#/R-CEL-211981	Xenobiotics	0			10	O45364	R-CEL-193048	http://www.reactome.org/PathwayBrowser/#/R-CEL-193048	Androgen biosynthesis	1	14
O45364	R-CEL-156581	http://www.reactome.org/PathwayBrowser/#/R-CEL-156581	Methylation	IEA	Caenorhabditis elegans	10	1	0	1		4	Q20500	R-CEL-1482788	http://www.reactome.org/PathwayBrowser/#/R-CEL-1482788	Acyl chain remodelling of PC	1	2		10	O44650	R-CEL-2142670	http://www.reactome.org/PathwayBrowser/#/R-CEL-2142670	Synthesis of epoxy (EET) and dihydroxyeicosatrienoic acids (DHET)	1	2		10	O62377	R-CEL-193048	http://www.reactome.org/PathwayBrowser/#/R-CEL-193048	Androgen biosynthesis	0
O62377	R-CEL-156581	http://www.reactome.org/PathwayBrowser/#/R-CEL-156581	Methylation	IEA	Caenorhabditis elegans	10	1	0	1		2	Q95QL1	R-CEL-1482788	http://www.reactome.org/PathwayBrowser/#/R-CEL-1482788	Acyl chain remodelling of PC	0			10	Q27470	R-CEL-2142670	http://www.reactome.org/PathwayBrowser/#/R-CEL-2142670	Synthesis of epoxy (EET) and dihydroxyeicosatrienoic acids (DHET)	0			10	O02627	R-CEL-193048	http://www.reactome.org/PathwayBrowser/#/R-CEL-193048	Androgen biosynthesis	0
O45364	R-CEL-193993	http://www.reactome.org/PathwayBrowser/#/R-CEL-193993	Mineralocorticoid biosynthesis	IEA	Caenorhabditis elegans	10	1	0	1		4	Q20500	R-CEL-1482839	http://www.reactome.org/PathwayBrowser/#/R-CEL-1482839	Acyl chain remodelling of PE	1	1		2	O02621	R-CEL-2142712	http://www.reactome.org/PathwayBrowser/#/R-CEL-2142712	Synthesis of 12-eicosatetraenoic acid derivatives	1	1		10	O44649	R-CEL-193048	http://www.reactome.org/PathwayBrowser/#/R-CEL-193048	Androgen biosynthesis	0
O62377	R-CEL-193993	http://www.reactome.org/PathwayBrowser/#/R-CEL-193993	Mineralocorticoid biosynthesis	IEA	Caenorhabditis elegans	10	1	0	1		1	Q11087	R-CEL-1482925	http://www.reactome.org/PathwayBrowser/#/R-CEL-1482925	Acyl chain remodelling of PG	1	1		2	O02621	R-CEL-2142770	http://www.reactome.org/PathwayBrowser/#/R-CEL-2142770	Synthesis of 15-eicosatetraenoic acid derivatives	1	1		10	Q9N5I1	R-CEL-193048	http://www.reactome.org/PathwayBrowser/#/R-CEL-193048	Androgen biosynthesis	0
Q9U2E4	R-CEL-975634	http://www.reactome.org/PathwayBrowser/#/R-CEL-975634	Retinoid metabolism and transport	IEA	Caenorhabditis elegans	2	1	0	1		2	Q9GZF3	R-CEL-1483191	http://www.reactome.org/PathwayBrowser/#/R-CEL-1483191	Synthesis of PC	1	2		10	O44650	R-CEL-2142816	http://www.reactome.org/PathwayBrowser/#/R-CEL-2142816	Synthesis of (16-20)-hydroxyeicosatetraenoic acids (HETE)	1	2		10	G5ECD0	R-CEL-193048	http://www.reactome.org/PathwayBrowser/#/R-CEL-193048	Androgen biosynthesis	0
O45364	R-CEL-2142816	http://www.reactome.org/PathwayBrowser/#/R-CEL-2142816	Synthesis of (16-20)-hydroxyeicosatetraenoic acids (HETE)	IEA	Caenorhabditis elegans	10	1	0	1		4	Q9XXT5	R-CEL-1483191	http://www.reactome.org/PathwayBrowser/#/R-CEL-1483191	Synthesis of PC	0			10	Q27470	R-CEL-2142816	http://www.reactome.org/PathwayBrowser/#/R-CEL-2142816	Synthesis of (16-20)-hydroxyeicosatetraenoic acids (HETE)	0			10	O02628	R-CEL-193048	http://www.reactome.org/PathwayBrowser/#/R-CEL-193048	Androgen biosynthesis	0
O62377	R-CEL-2142816	http://www.reactome.org/PathwayBrowser/#/R-CEL-2142816	Synthesis of (16-20)-hydroxyeicosatetraenoic acids (HETE)	IEA	Caenorhabditis elegans	10	1	0	1		2	Q965T2	R-CEL-1483196	http://www.reactome.org/PathwayBrowser/#/R-CEL-1483196	PI and PC transport between ER and Golgi membranes	1	2		2	Q27513	R-CEL-2162123	http://www.reactome.org/PathwayBrowser/#/R-CEL-2162123	Synthesis of Prostaglandins (PG) and Thromboxanes (TX)	1	4		10	O16220	R-CEL-193048	http://www.reactome.org/PathwayBrowser/#/R-CEL-193048	Androgen biosynthesis	0
O45364	R-CEL-2142670	http://www.reactome.org/PathwayBrowser/#/R-CEL-2142670	Synthesis of epoxy (EET) and dihydroxyeicosatrienoic acids (DHET)	IEA	Caenorhabditis elegans	10	1	0	1		2	Q965T2	R-CEL-1483196	http://www.reactome.org/PathwayBrowser/#/R-CEL-1483196	PI and PC transport between ER and Golgi membranes	0			2	Q27515	R-CEL-2162123	http://www.reactome.org/PathwayBrowser/#/R-CEL-2162123	Synthesis of Prostaglandins (PG) and Thromboxanes (TX)	0			10	O16670	R-CEL-193048	http://www.reactome.org/PathwayBrowser/#/R-CEL-193048	Androgen biosynthesis	0
O62377	R-CEL-2142670	http://www.reactome.org/PathwayBrowser/#/R-CEL-2142670	Synthesis of epoxy (EET) and dihydroxyeicosatrienoic acids (DHET)	IEA	Caenorhabditis elegans	10	1	0	1		2	Q9GZF3	R-CEL-1483213	http://www.reactome.org/PathwayBrowser/#/R-CEL-1483213	Synthesis of PE	1	2		2	Q27519	R-CEL-2162123	http://www.reactome.org/PathwayBrowser/#/R-CEL-2162123	Synthesis of Prostaglandins (PG) and Thromboxanes (TX)	0			10	O61204	R-CEL-193048	http://www.reactome.org/PathwayBrowser/#/R-CEL-193048	Androgen biosynthesis	0
Q9U2E4	R-CEL-2453902	http://www.reactome.org/PathwayBrowser/#/R-CEL-2453902	The canonical retinoid cycle in rods (twilight vision)	IEA	Caenorhabditis elegans	2	1	0	1		4	Q9XXT5	R-CEL-1483213	http://www.reactome.org/PathwayBrowser/#/R-CEL-1483213	Synthesis of PE	0			2	Q27514	R-CEL-2162123	http://www.reactome.org/PathwayBrowser/#/R-CEL-2162123	Synthesis of Prostaglandins (PG) and Thromboxanes (TX)	0			10	Q27471	R-CEL-193048	http://www.reactome.org/PathwayBrowser/#/R-CEL-193048	Androgen biosynthesis	0
O45364	R-CEL-211981	http://www.reactome.org/PathwayBrowser/#/R-CEL-211981	Xenobiotics	IEA	Caenorhabditis elegans	10	1	0	1		10	O44650	R-CEL-156581	http://www.reactome.org/PathwayBrowser/#/R-CEL-156581	Methylation	1	8		2	Q8MYL7	R-CEL-3299685	http://www.reactome.org/PathwayBrowser/#/R-CEL-3299685	Detoxification of Reactive Oxygen Species	1	2		10	Q27505	R-CEL-193048	http://www.reactome.org/PathwayBrowser/#/R-CEL-193048	Androgen biosynthesis	0
O62377	R-CEL-211981	http://www.reactome.org/PathwayBrowser/#/R-CEL-211981	Xenobiotics	IEA	Caenorhabditis elegans	10	1	0	1		10	O45364	R-CEL-156581	http://www.reactome.org/PathwayBrowser/#/R-CEL-156581	Methylation	0			2	O61235	R-CEL-3299685	http://www.reactome.org/PathwayBrowser/#/R-CEL-3299685	Detoxification of Reactive Oxygen Species	0			10	Q27506	R-CEL-193048	http://www.reactome.org/PathwayBrowser/#/R-CEL-193048	Androgen biosynthesis	0
Q9NAC6	R-CEL-2426168	http://www.reactome.org/PathwayBrowser/#/R-CEL-2426168	Activation of gene expression by SREBF (SREBP)	IEA	Caenorhabditis elegans	4	0	0	1		10	O62377	R-CEL-156581	http://www.reactome.org/PathwayBrowser/#/R-CEL-156581	Methylation	0			2	Q9XX44	R-CEL-352230	http://www.reactome.org/PathwayBrowser/#/R-CEL-352230	Amino acid transport across the plasma membrane	1	1		10	Q27507	R-CEL-193048	http://www.reactome.org/PathwayBrowser/#/R-CEL-193048	Androgen biosynthesis	0
O02627	R-CEL-5423646	http://www.reactome.org/PathwayBrowser/#/R-CEL-5423646	Aflatoxin activation and detoxification	IEA	Caenorhabditis elegans	10	0	0	1		10	O44706	R-CEL-156581	http://www.reactome.org/PathwayBrowser/#/R-CEL-156581	Methylation	0			2	Q9XX44	R-CEL-428559	http://www.reactome.org/PathwayBrowser/#/R-CEL-428559	Proton-coupled neutral amino acid transporters	1	1		10	O45364	R-CEL-193993	http://www.reactome.org/PathwayBrowser/#/R-CEL-193993	Mineralocorticoid biosynthesis	1	14
O44649	R-CEL-5423646	http://www.reactome.org/PathwayBrowser/#/R-CEL-5423646	Aflatoxin activation and detoxification	IEA	Caenorhabditis elegans	10	0	0	1		10	O02641	R-CEL-156581	http://www.reactome.org/PathwayBrowser/#/R-CEL-156581	Methylation	0			2	O18030	R-CEL-5365859	http://www.reactome.org/PathwayBrowser/#/R-CEL-5365859	RA biosynthesis pathway	1	2		10	O62377	R-CEL-193993	http://www.reactome.org/PathwayBrowser/#/R-CEL-193993	Mineralocorticoid biosynthesis	0
Q9N5I1	R-CEL-5423646	http://www.reactome.org/PathwayBrowser/#/R-CEL-5423646	Aflatoxin activation and detoxification	IEA	Caenorhabditis elegans	10	0	0	1		10	O62378	R-CEL-156581	http://www.reactome.org/PathwayBrowser/#/R-CEL-156581	Methylation	0			1	Q20840	R-CEL-5365859	http://www.reactome.org/PathwayBrowser/#/R-CEL-5365859	RA biosynthesis pathway	0			10	O02627	R-CEL-193993	http://www.reactome.org/PathwayBrowser/#/R-CEL-193993	Mineralocorticoid biosynthesis	0
Q9NAC6	R-CEL-2046106	http://www.reactome.org/PathwayBrowser/#/R-CEL-2046106	alpha-linolenic acid (ALA) metabolism	IEA	Caenorhabditis elegans	4	0	0	1		10	P90771	R-CEL-156581	http://www.reactome.org/PathwayBrowser/#/R-CEL-156581	Methylation	0			10	O44650	R-CEL-5423646	http://www.reactome.org/PathwayBrowser/#/R-CEL-5423646	Aflatoxin activation and detoxification	1	2		10	O44649	R-CEL-193993	http://www.reactome.org/PathwayBrowser/#/R-CEL-193993	Mineralocorticoid biosynthesis	0
O02627	R-CEL-193048	http://www.reactome.org/PathwayBrowser/#/R-CEL-193048	Androgen biosynthesis	IEA	Caenorhabditis elegans	10	0	0	1		10	Q27531	R-CEL-156581	http://www.reactome.org/PathwayBrowser/#/R-CEL-156581	Methylation	0			10	Q27470	R-CEL-5423646	http://www.reactome.org/PathwayBrowser/#/R-CEL-5423646	Aflatoxin activation and detoxification	0			10	Q9N5I1	R-CEL-193993	http://www.reactome.org/PathwayBrowser/#/R-CEL-193993	Mineralocorticoid biosynthesis	0
O44649	R-CEL-193048	http://www.reactome.org/PathwayBrowser/#/R-CEL-193048	Androgen biosynthesis	IEA	Caenorhabditis elegans	10	0	0	1		4	Q9TXU7	R-CEL-156827	http://www.reactome.org/PathwayBrowser/#/R-CEL-156827	L13a-mediated translational silencing of Ceruloplasmin expression	1	2		2	Q8MYL7	R-CEL-74259	http://www.reactome.org/PathwayBrowser/#/R-CEL-74259	Purine catabolism	1	2		10	G5ECD0	R-CEL-193993	http://www.reactome.org/PathwayBrowser/#/R-CEL-193993	Mineralocorticoid biosynthesis	0
Q9N5I1	R-CEL-193048	http://www.reactome.org/PathwayBrowser/#/R-CEL-193048	Androgen biosynthesis	IEA	Caenorhabditis elegans	10	0	0	1		4	Q20935	R-CEL-156827	http://www.reactome.org/PathwayBrowser/#/R-CEL-156827	L13a-mediated translational silencing of Ceruloplasmin expression	0			2	O61235	R-CEL-74259	http://www.reactome.org/PathwayBrowser/#/R-CEL-74259	Purine catabolism	0			10	O02628	R-CEL-193993	http://www.reactome.org/PathwayBrowser/#/R-CEL-193993	Mineralocorticoid biosynthesis	0
O02627	R-CEL-211957	http://www.reactome.org/PathwayBrowser/#/R-CEL-211957	Aromatic amines can be N-hydroxylated or N-dealkylated by CYP1A2	IEA	Caenorhabditis elegans	10	0	0	1		3	B3WFZ3	R-CEL-159418	http://www.reactome.org/PathwayBrowser/#/R-CEL-159418	Recycling of bile acids and salts	1	3		1	Q21657	R-CEL-947581	http://www.reactome.org/PathwayBrowser/#/R-CEL-947581	Molybdenum cofactor biosynthesis	1	1		10	O16220	R-CEL-193993	http://www.reactome.org/PathwayBrowser/#/R-CEL-193993	Mineralocorticoid biosynthesis	0
O44649	R-CEL-211957	http://www.reactome.org/PathwayBrowser/#/R-CEL-211957	Aromatic amines can be N-hydroxylated or N-dealkylated by CYP1A2	IEA	Caenorhabditis elegans	10	0	0	1		3	O01862	R-CEL-159418	http://www.reactome.org/PathwayBrowser/#/R-CEL-159418	Recycling of bile acids and salts	0											10	O16670	R-CEL-193993	http://www.reactome.org/PathwayBrowser/#/R-CEL-193993	Mineralocorticoid biosynthesis	0
Q9N5I1	R-CEL-211957	http://www.reactome.org/PathwayBrowser/#/R-CEL-211957	Aromatic amines can be N-hydroxylated or N-dealkylated by CYP1A2	IEA	Caenorhabditis elegans	10	0	0	1		3	O45003	R-CEL-159418	http://www.reactome.org/PathwayBrowser/#/R-CEL-159418	Recycling of bile acids and salts	0			No. of pathways/gene					No. of Genes/pathway	No. of pathways		10	O61204	R-CEL-193993	http://www.reactome.org/PathwayBrowser/#/R-CEL-193993	Mineralocorticoid biosynthesis	0
O61750	R-CEL-3299685	http://www.reactome.org/PathwayBrowser/#/R-CEL-3299685	Detoxification of Reactive Oxygen Species	IEA	Caenorhabditis elegans	2	0	0	1		1	J7SF87	R-CEL-1614517	http://www.reactome.org/PathwayBrowser/#/R-CEL-1614517	Sulfide oxidation to sulfate	1	2		1	3	3			1	7		10	Q27471	R-CEL-193993	http://www.reactome.org/PathwayBrowser/#/R-CEL-193993	Mineralocorticoid biosynthesis	0
Q9XUT8	R-CEL-211979	http://www.reactome.org/PathwayBrowser/#/R-CEL-211979	Eicosanoids	IEA	Caenorhabditis elegans	2	0	0	1		1	O62133	R-CEL-1614517	http://www.reactome.org/PathwayBrowser/#/R-CEL-1614517	Sulfide oxidation to sulfate	0			2	18	9			2	13		10	Q27505	R-CEL-193993	http://www.reactome.org/PathwayBrowser/#/R-CEL-193993	Mineralocorticoid biosynthesis	0
O02627	R-CEL-211976	http://www.reactome.org/PathwayBrowser/#/R-CEL-211976	Endogenous sterols	IEA	Caenorhabditis elegans	10	0	0	1		3	G5EED4	R-CEL-165158	http://www.reactome.org/PathwayBrowser/#/R-CEL-165158	Activation of AKT2	1	2		3	0	0			3	0		10	Q27506	R-CEL-193993	http://www.reactome.org/PathwayBrowser/#/R-CEL-193993	Mineralocorticoid biosynthesis	0
O44649	R-CEL-211976	http://www.reactome.org/PathwayBrowser/#/R-CEL-211976	Endogenous sterols	IEA	Caenorhabditis elegans	10	0	0	1		3	G5EED4	R-CEL-165158	http://www.reactome.org/PathwayBrowser/#/R-CEL-165158	Activation of AKT2	0			4	0	0			4	2		10	Q27507	R-CEL-193993	http://www.reactome.org/PathwayBrowser/#/R-CEL-193993	Mineralocorticoid biosynthesis	0
Q9N5I1	R-CEL-211976	http://www.reactome.org/PathwayBrowser/#/R-CEL-211976	Endogenous sterols	IEA	Caenorhabditis elegans	10	0	0	1		3	P34370	R-CEL-1660499	http://www.reactome.org/PathwayBrowser/#/R-CEL-1660499	Synthesis of PIPs at the plasma membrane	1	1		5	0	0				22		10	O45364	R-CEL-194002	http://www.reactome.org/PathwayBrowser/#/R-CEL-194002	Glucocorticoid biosynthesis	1	14
O02627	R-CEL-194002	http://www.reactome.org/PathwayBrowser/#/R-CEL-194002	Glucocorticoid biosynthesis	IEA	Caenorhabditis elegans	10	0	0	1		1	Q17456	R-CEL-1660661	http://www.reactome.org/PathwayBrowser/#/R-CEL-1660661	Sphingolipid de novo biosynthesis	1	1		6	0	0						10	O62377	R-CEL-194002	http://www.reactome.org/PathwayBrowser/#/R-CEL-194002	Glucocorticoid biosynthesis	0
O44649	R-CEL-194002	http://www.reactome.org/PathwayBrowser/#/R-CEL-194002	Glucocorticoid biosynthesis	IEA	Caenorhabditis elegans	10	0	0	1		1	G5EC84	R-CEL-1660662	http://www.reactome.org/PathwayBrowser/#/R-CEL-1660662	Glycosphingolipid metabolism	1	4		7	0	0						10	O02627	R-CEL-194002	http://www.reactome.org/PathwayBrowser/#/R-CEL-194002	Glucocorticoid biosynthesis	0
Q9N5I1	R-CEL-194002	http://www.reactome.org/PathwayBrowser/#/R-CEL-194002	Glucocorticoid biosynthesis	IEA	Caenorhabditis elegans	10	0	0	1		1	Q21801	R-CEL-1660662	http://www.reactome.org/PathwayBrowser/#/R-CEL-1660662	Glycosphingolipid metabolism	0			8	0	0						10	O44649	R-CEL-194002	http://www.reactome.org/PathwayBrowser/#/R-CEL-194002	Glucocorticoid biosynthesis	0
O61750	R-CEL-156590	http://www.reactome.org/PathwayBrowser/#/R-CEL-156590	Glutathione conjugation	IEA	Caenorhabditis elegans	2	0	0	1		1	Q09551	R-CEL-1660662	http://www.reactome.org/PathwayBrowser/#/R-CEL-1660662	Glycosphingolipid metabolism	0			9	0	0						10	Q9N5I1	R-CEL-194002	http://www.reactome.org/PathwayBrowser/#/R-CEL-194002	Glucocorticoid biosynthesis	0
O01893	R-CEL-1660662	http://www.reactome.org/PathwayBrowser/#/R-CEL-1660662	Glycosphingolipid metabolism	IEA	Caenorhabditis elegans	1	0	0	1		3	Q27526	R-CEL-1660662	http://www.reactome.org/PathwayBrowser/#/R-CEL-1660662	Glycosphingolipid metabolism	0			10	20	2						10	G5ECD0	R-CEL-194002	http://www.reactome.org/PathwayBrowser/#/R-CEL-194002	Glucocorticoid biosynthesis	0
Q9NAC6	R-CEL-2046105	http://www.reactome.org/PathwayBrowser/#/R-CEL-2046105	Linoleic acid (LA) metabolism	IEA	Caenorhabditis elegans	4	0	0	1		2	O16289	R-CEL-1679131	http://www.reactome.org/PathwayBrowser/#/R-CEL-1679131	Trafficking and processing of endosomal TLR	1	6				14						10	O02628	R-CEL-194002	http://www.reactome.org/PathwayBrowser/#/R-CEL-194002	Glucocorticoid biosynthesis	0
O02627	R-CEL-156581	http://www.reactome.org/PathwayBrowser/#/R-CEL-156581	Methylation	IEA	Caenorhabditis elegans	10	0	0	1		2	P43507	R-CEL-1679131	http://www.reactome.org/PathwayBrowser/#/R-CEL-1679131	Trafficking and processing of endosomal TLR	0											10	O16220	R-CEL-194002	http://www.reactome.org/PathwayBrowser/#/R-CEL-194002	Glucocorticoid biosynthesis	0
O44649	R-CEL-156581	http://www.reactome.org/PathwayBrowser/#/R-CEL-156581	Methylation	IEA	Caenorhabditis elegans	10	0	0	1		2	Q20950	R-CEL-1679131	http://www.reactome.org/PathwayBrowser/#/R-CEL-1679131	Trafficking and processing of endosomal TLR	0											10	O16670	R-CEL-194002	http://www.reactome.org/PathwayBrowser/#/R-CEL-194002	Glucocorticoid biosynthesis	0
Q9N5I1	R-CEL-156581	http://www.reactome.org/PathwayBrowser/#/R-CEL-156581	Methylation	IEA	Caenorhabditis elegans	10	0	0	1		2	P25807	R-CEL-1679131	http://www.reactome.org/PathwayBrowser/#/R-CEL-1679131	Trafficking and processing of endosomal TLR	0											10	O61204	R-CEL-194002	http://www.reactome.org/PathwayBrowser/#/R-CEL-194002	Glucocorticoid biosynthesis	0
O02627	R-CEL-193993	http://www.reactome.org/PathwayBrowser/#/R-CEL-193993	Mineralocorticoid biosynthesis	IEA	Caenorhabditis elegans	10	0	0	1		2	P43508	R-CEL-1679131	http://www.reactome.org/PathwayBrowser/#/R-CEL-1679131	Trafficking and processing of endosomal TLR	0											10	Q27471	R-CEL-194002	http://www.reactome.org/PathwayBrowser/#/R-CEL-194002	Glucocorticoid biosynthesis	0
O44649	R-CEL-193993	http://www.reactome.org/PathwayBrowser/#/R-CEL-193993	Mineralocorticoid biosynthesis	IEA	Caenorhabditis elegans	10	0	0	1		2	P91991	R-CEL-1679131	http://www.reactome.org/PathwayBrowser/#/R-CEL-1679131	Trafficking and processing of endosomal TLR	0											10	Q27505	R-CEL-194002	http://www.reactome.org/PathwayBrowser/#/R-CEL-194002	Glucocorticoid biosynthesis	0
Q9N5I1	R-CEL-193993	http://www.reactome.org/PathwayBrowser/#/R-CEL-193993	Mineralocorticoid biosynthesis	IEA	Caenorhabditis elegans	10	0	0	1		6	G5EEX4	R-CEL-174113	http://www.reactome.org/PathwayBrowser/#/R-CEL-174113	SCF-beta-TrCP mediated degradation of Emi1	1	3										10	Q27506	R-CEL-194002	http://www.reactome.org/PathwayBrowser/#/R-CEL-194002	Glucocorticoid biosynthesis	0
Q23068	R-CEL-211945	http://www.reactome.org/PathwayBrowser/#/R-CEL-211945	Phase 1 - Functionalization of compounds	IEA	Caenorhabditis elegans	1	0	0	1		6	G5EFA9	R-CEL-174113	http://www.reactome.org/PathwayBrowser/#/R-CEL-174113	SCF-beta-TrCP mediated degradation of Emi1	0											10	Q27507	R-CEL-194002	http://www.reactome.org/PathwayBrowser/#/R-CEL-194002	Glucocorticoid biosynthesis	0
O02627	R-CEL-2142816	http://www.reactome.org/PathwayBrowser/#/R-CEL-2142816	Synthesis of (16-20)-hydroxyeicosatetraenoic acids (HETE)	IEA	Caenorhabditis elegans	10	0	0	1		6	G5EG39	R-CEL-174113	http://www.reactome.org/PathwayBrowser/#/R-CEL-174113	SCF-beta-TrCP mediated degradation of Emi1	0											3	P34345	R-CEL-196836	http://www.reactome.org/PathwayBrowser/#/R-CEL-196836	Vitamin C (ascorbate) metabolism	1	1
O44649	R-CEL-2142816	http://www.reactome.org/PathwayBrowser/#/R-CEL-2142816	Synthesis of (16-20)-hydroxyeicosatetraenoic acids (HETE)	IEA	Caenorhabditis elegans	10	0	0	1		6	Q21430	R-CEL-182971	http://www.reactome.org/PathwayBrowser/#/R-CEL-182971	EGFR downregulation	1	1										4	Q9NAC6	R-CEL-2046105	http://www.reactome.org/PathwayBrowser/#/R-CEL-2046105	Linoleic acid (LA) metabolism	1	1
Q9N5I1	R-CEL-2142816	http://www.reactome.org/PathwayBrowser/#/R-CEL-2142816	Synthesis of (16-20)-hydroxyeicosatetraenoic acids (HETE)	IEA	Caenorhabditis elegans	10	0	0	1		2	O02167	R-CEL-1855167	http://www.reactome.org/PathwayBrowser/#/R-CEL-1855167	Synthesis of pyrophosphates in the cytosol	1	1										4	Q9NAC6	R-CEL-2046106	http://www.reactome.org/PathwayBrowser/#/R-CEL-2046106	alpha-linolenic acid (ALA) metabolism	1	1
O02627	R-CEL-2142670	http://www.reactome.org/PathwayBrowser/#/R-CEL-2142670	Synthesis of epoxy (EET) and dihydroxyeicosatrienoic acids (DHET)	IEA	Caenorhabditis elegans	10	0	0	1		3	P34370	R-CEL-1855183	http://www.reactome.org/PathwayBrowser/#/R-CEL-1855183	Synthesis of IP2, IP, and Ins in the cytosol	1	1										1	Q23068	R-CEL-211945	http://www.reactome.org/PathwayBrowser/#/R-CEL-211945	Phase 1 - Functionalization of compounds	1	1
O44649	R-CEL-2142670	http://www.reactome.org/PathwayBrowser/#/R-CEL-2142670	Synthesis of epoxy (EET) and dihydroxyeicosatrienoic acids (DHET)	IEA	Caenorhabditis elegans	10	0	0	1		2	O02167	R-CEL-1855191	http://www.reactome.org/PathwayBrowser/#/R-CEL-1855191	Synthesis of IPs in the nucleus	1	1										10	O45364	R-CEL-211957	http://www.reactome.org/PathwayBrowser/#/R-CEL-211957	Aromatic amines can be N-hydroxylated or N-dealkylated by CYP1A2	1	14
Q9N5I1	R-CEL-2142670	http://www.reactome.org/PathwayBrowser/#/R-CEL-2142670	Synthesis of epoxy (EET) and dihydroxyeicosatrienoic acids (DHET)	IEA	Caenorhabditis elegans	10	0	0	1		3	P34370	R-CEL-1855204	http://www.reactome.org/PathwayBrowser/#/R-CEL-1855204	Synthesis of IP3 and IP4 in the cytosol	1	1										10	O62377	R-CEL-211957	http://www.reactome.org/PathwayBrowser/#/R-CEL-211957	Aromatic amines can be N-hydroxylated or N-dealkylated by CYP1A2	0
Q9XUT8	R-CEL-2162123	http://www.reactome.org/PathwayBrowser/#/R-CEL-2162123	Synthesis of Prostaglandins (PG) and Thromboxanes (TX)	IEA	Caenorhabditis elegans	2	0	0	1		6	G5EEX4	R-CEL-187577	http://www.reactome.org/PathwayBrowser/#/R-CEL-187577	SCF(Skp2)-mediated degradation of p27/p21	1	6										10	O02627	R-CEL-211957	http://www.reactome.org/PathwayBrowser/#/R-CEL-211957	Aromatic amines can be N-hydroxylated or N-dealkylated by CYP1A2	0
Q9NAC6	R-CEL-75876	http://www.reactome.org/PathwayBrowser/#/R-CEL-75876	Synthesis of very long-chain fatty acyl-CoAs	IEA	Caenorhabditis elegans	4	0	0	1		6	G5EEX4	R-CEL-187577	http://www.reactome.org/PathwayBrowser/#/R-CEL-187577	SCF(Skp2)-mediated degradation of p27/p21	0											10	O44649	R-CEL-211957	http://www.reactome.org/PathwayBrowser/#/R-CEL-211957	Aromatic amines can be N-hydroxylated or N-dealkylated by CYP1A2	0
O02627	R-CEL-211981	http://www.reactome.org/PathwayBrowser/#/R-CEL-211981	Xenobiotics	IEA	Caenorhabditis elegans	10	0	0	1		6	G5EFA9	R-CEL-187577	http://www.reactome.org/PathwayBrowser/#/R-CEL-187577	SCF(Skp2)-mediated degradation of p27/p21	0											10	Q9N5I1	R-CEL-211957	http://www.reactome.org/PathwayBrowser/#/R-CEL-211957	Aromatic amines can be N-hydroxylated or N-dealkylated by CYP1A2	0
O44649	R-CEL-211981	http://www.reactome.org/PathwayBrowser/#/R-CEL-211981	Xenobiotics	IEA	Caenorhabditis elegans	10	0	0	1		6	G5EFA9	R-CEL-187577	http://www.reactome.org/PathwayBrowser/#/R-CEL-187577	SCF(Skp2)-mediated degradation of p27/p21	0											10	G5ECD0	R-CEL-211957	http://www.reactome.org/PathwayBrowser/#/R-CEL-211957	Aromatic amines can be N-hydroxylated or N-dealkylated by CYP1A2	0
Q9N5I1	R-CEL-211981	http://www.reactome.org/PathwayBrowser/#/R-CEL-211981	Xenobiotics	IEA	Caenorhabditis elegans	10	0	0	1		6	G5EG39	R-CEL-187577	http://www.reactome.org/PathwayBrowser/#/R-CEL-187577	SCF(Skp2)-mediated degradation of p27/p21	0											10	O02628	R-CEL-211957	http://www.reactome.org/PathwayBrowser/#/R-CEL-211957	Aromatic amines can be N-hydroxylated or N-dealkylated by CYP1A2	0
G5ECD0	R-CEL-5423646	http://www.reactome.org/PathwayBrowser/#/R-CEL-5423646	Aflatoxin activation and detoxification	IEA	Caenorhabditis elegans	10	0	0	1		6	G5EG39	R-CEL-187577	http://www.reactome.org/PathwayBrowser/#/R-CEL-187577	SCF(Skp2)-mediated degradation of p27/p21	0											10	O16220	R-CEL-211957	http://www.reactome.org/PathwayBrowser/#/R-CEL-211957	Aromatic amines can be N-hydroxylated or N-dealkylated by CYP1A2	0
O02628	R-CEL-5423646	http://www.reactome.org/PathwayBrowser/#/R-CEL-5423646	Aflatoxin activation and detoxification	IEA	Caenorhabditis elegans	10	0	0	1		6	O44616	R-CEL-189200	http://www.reactome.org/PathwayBrowser/#/R-CEL-189200	Hexose transport	1	1										10	O16670	R-CEL-211957	http://www.reactome.org/PathwayBrowser/#/R-CEL-211957	Aromatic amines can be N-hydroxylated or N-dealkylated by CYP1A2	0
O16220	R-CEL-5423646	http://www.reactome.org/PathwayBrowser/#/R-CEL-5423646	Aflatoxin activation and detoxification	IEA	Caenorhabditis elegans	10	0	0	1		1	O16956	R-CEL-192456	http://www.reactome.org/PathwayBrowser/#/R-CEL-192456	Digestion of dietary lipid	1	1										10	O61204	R-CEL-211957	http://www.reactome.org/PathwayBrowser/#/R-CEL-211957	Aromatic amines can be N-hydroxylated or N-dealkylated by CYP1A2	0
O16670	R-CEL-5423646	http://www.reactome.org/PathwayBrowser/#/R-CEL-5423646	Aflatoxin activation and detoxification	IEA	Caenorhabditis elegans	10	0	0	1		10	O44650	R-CEL-193048	http://www.reactome.org/PathwayBrowser/#/R-CEL-193048	Androgen biosynthesis	1	8										10	Q27471	R-CEL-211957	http://www.reactome.org/PathwayBrowser/#/R-CEL-211957	Aromatic amines can be N-hydroxylated or N-dealkylated by CYP1A2	0
O61204	R-CEL-5423646	http://www.reactome.org/PathwayBrowser/#/R-CEL-5423646	Aflatoxin activation and detoxification	IEA	Caenorhabditis elegans	10	0	0	1		10	O45364	R-CEL-193048	http://www.reactome.org/PathwayBrowser/#/R-CEL-193048	Androgen biosynthesis	0											10	Q27505	R-CEL-211957	http://www.reactome.org/PathwayBrowser/#/R-CEL-211957	Aromatic amines can be N-hydroxylated or N-dealkylated by CYP1A2	0
Q27471	R-CEL-5423646	http://www.reactome.org/PathwayBrowser/#/R-CEL-5423646	Aflatoxin activation and detoxification	IEA	Caenorhabditis elegans	10	0	0	1		10	O62377	R-CEL-193048	http://www.reactome.org/PathwayBrowser/#/R-CEL-193048	Androgen biosynthesis	0											10	Q27506	R-CEL-211957	http://www.reactome.org/PathwayBrowser/#/R-CEL-211957	Aromatic amines can be N-hydroxylated or N-dealkylated by CYP1A2	0
Q27505	R-CEL-5423646	http://www.reactome.org/PathwayBrowser/#/R-CEL-5423646	Aflatoxin activation and detoxification	IEA	Caenorhabditis elegans	10	0	0	1		10	O44706	R-CEL-193048	http://www.reactome.org/PathwayBrowser/#/R-CEL-193048	Androgen biosynthesis	0											10	Q27507	R-CEL-211957	http://www.reactome.org/PathwayBrowser/#/R-CEL-211957	Aromatic amines can be N-hydroxylated or N-dealkylated by CYP1A2	0
Q27506	R-CEL-5423646	http://www.reactome.org/PathwayBrowser/#/R-CEL-5423646	Aflatoxin activation and detoxification	IEA	Caenorhabditis elegans	10	0	0	1		10	O02641	R-CEL-193048	http://www.reactome.org/PathwayBrowser/#/R-CEL-193048	Androgen biosynthesis	0											10	O45364	R-CEL-211976	http://www.reactome.org/PathwayBrowser/#/R-CEL-211976	Endogenous sterols	1	14
Q27507	R-CEL-5423646	http://www.reactome.org/PathwayBrowser/#/R-CEL-5423646	Aflatoxin activation and detoxification	IEA	Caenorhabditis elegans	10	0	0	1		10	O62378	R-CEL-193048	http://www.reactome.org/PathwayBrowser/#/R-CEL-193048	Androgen biosynthesis	0											10	O62377	R-CEL-211976	http://www.reactome.org/PathwayBrowser/#/R-CEL-211976	Endogenous sterols	0
G5ECD0	R-CEL-193048	http://www.reactome.org/PathwayBrowser/#/R-CEL-193048	Androgen biosynthesis	IEA	Caenorhabditis elegans	10	0	0	1		10	P90771	R-CEL-193048	http://www.reactome.org/PathwayBrowser/#/R-CEL-193048	Androgen biosynthesis	0											10	O02627	R-CEL-211976	http://www.reactome.org/PathwayBrowser/#/R-CEL-211976	Endogenous sterols	0
O02628	R-CEL-193048	http://www.reactome.org/PathwayBrowser/#/R-CEL-193048	Androgen biosynthesis	IEA	Caenorhabditis elegans	10	0	0	1		10	Q27531	R-CEL-193048	http://www.reactome.org/PathwayBrowser/#/R-CEL-193048	Androgen biosynthesis	0											10	O44649	R-CEL-211976	http://www.reactome.org/PathwayBrowser/#/R-CEL-211976	Endogenous sterols	0
O16220	R-CEL-193048	http://www.reactome.org/PathwayBrowser/#/R-CEL-193048	Androgen biosynthesis	IEA	Caenorhabditis elegans	10	0	0	1		2	O18030	R-CEL-193144	http://www.reactome.org/PathwayBrowser/#/R-CEL-193144	Estrogen biosynthesis	1	1										10	Q9N5I1	R-CEL-211976	http://www.reactome.org/PathwayBrowser/#/R-CEL-211976	Endogenous sterols	0
O16670	R-CEL-193048	http://www.reactome.org/PathwayBrowser/#/R-CEL-193048	Androgen biosynthesis	IEA	Caenorhabditis elegans	10	0	0	1		3	B3WFZ3	R-CEL-193368	http://www.reactome.org/PathwayBrowser/#/R-CEL-193368	Synthesis of bile acids and bile salts via 7alpha-hydroxycholesterol	1	5										10	G5ECD0	R-CEL-211976	http://www.reactome.org/PathwayBrowser/#/R-CEL-211976	Endogenous sterols	0
O61204	R-CEL-193048	http://www.reactome.org/PathwayBrowser/#/R-CEL-193048	Androgen biosynthesis	IEA	Caenorhabditis elegans	10	0	0	1		3	G5EDP2	R-CEL-193368	http://www.reactome.org/PathwayBrowser/#/R-CEL-193368	Synthesis of bile acids and bile salts via 7alpha-hydroxycholesterol	0											10	O02628	R-CEL-211976	http://www.reactome.org/PathwayBrowser/#/R-CEL-211976	Endogenous sterols	0
Q27471	R-CEL-193048	http://www.reactome.org/PathwayBrowser/#/R-CEL-193048	Androgen biosynthesis	IEA	Caenorhabditis elegans	10	0	0	1		3	O01862	R-CEL-193368	http://www.reactome.org/PathwayBrowser/#/R-CEL-193368	Synthesis of bile acids and bile salts via 7alpha-hydroxycholesterol	0											10	O16220	R-CEL-211976	http://www.reactome.org/PathwayBrowser/#/R-CEL-211976	Endogenous sterols	0
Q27505	R-CEL-193048	http://www.reactome.org/PathwayBrowser/#/R-CEL-193048	Androgen biosynthesis	IEA	Caenorhabditis elegans	10	0	0	1		3	O45003	R-CEL-193368	http://www.reactome.org/PathwayBrowser/#/R-CEL-193368	Synthesis of bile acids and bile salts via 7alpha-hydroxycholesterol	0											10	O16670	R-CEL-211976	http://www.reactome.org/PathwayBrowser/#/R-CEL-211976	Endogenous sterols	0
Q27506	R-CEL-193048	http://www.reactome.org/PathwayBrowser/#/R-CEL-193048	Androgen biosynthesis	IEA	Caenorhabditis elegans	10	0	0	1		5	Q9U1Q5	R-CEL-193368	http://www.reactome.org/PathwayBrowser/#/R-CEL-193368	Synthesis of bile acids and bile salts via 7alpha-hydroxycholesterol	0											10	O61204	R-CEL-211976	http://www.reactome.org/PathwayBrowser/#/R-CEL-211976	Endogenous sterols	0
Q27507	R-CEL-193048	http://www.reactome.org/PathwayBrowser/#/R-CEL-193048	Androgen biosynthesis	IEA	Caenorhabditis elegans	10	0	0	1		3	Q21653	R-CEL-193648	http://www.reactome.org/PathwayBrowser/#/R-CEL-193648	NRAGE signals death through JNK	1	3										10	Q27471	R-CEL-211976	http://www.reactome.org/PathwayBrowser/#/R-CEL-211976	Endogenous sterols	0
G5ECD0	R-CEL-211957	http://www.reactome.org/PathwayBrowser/#/R-CEL-211957	Aromatic amines can be N-hydroxylated or N-dealkylated by CYP1A2	IEA	Caenorhabditis elegans	10	0	0	1		5	O01847	R-CEL-193648	http://www.reactome.org/PathwayBrowser/#/R-CEL-193648	NRAGE signals death through JNK	0											10	Q27505	R-CEL-211976	http://www.reactome.org/PathwayBrowser/#/R-CEL-211976	Endogenous sterols	0
O02628	R-CEL-211957	http://www.reactome.org/PathwayBrowser/#/R-CEL-211957	Aromatic amines can be N-hydroxylated or N-dealkylated by CYP1A2	IEA	Caenorhabditis elegans	10	0	0	1		6	Q21430	R-CEL-193648	http://www.reactome.org/PathwayBrowser/#/R-CEL-193648	NRAGE signals death through JNK	0											10	Q27506	R-CEL-211976	http://www.reactome.org/PathwayBrowser/#/R-CEL-211976	Endogenous sterols	0
O16220	R-CEL-211957	http://www.reactome.org/PathwayBrowser/#/R-CEL-211957	Aromatic amines can be N-hydroxylated or N-dealkylated by CYP1A2	IEA	Caenorhabditis elegans	10	0	0	1		10	O44650	R-CEL-193993	http://www.reactome.org/PathwayBrowser/#/R-CEL-193993	Mineralocorticoid biosynthesis	1	8										10	Q27507	R-CEL-211976	http://www.reactome.org/PathwayBrowser/#/R-CEL-211976	Endogenous sterols	0
O16670	R-CEL-211957	http://www.reactome.org/PathwayBrowser/#/R-CEL-211957	Aromatic amines can be N-hydroxylated or N-dealkylated by CYP1A2	IEA	Caenorhabditis elegans	10	0	0	1		10	O45364	R-CEL-193993	http://www.reactome.org/PathwayBrowser/#/R-CEL-193993	Mineralocorticoid biosynthesis	0											2	Q27515	R-CEL-211979	http://www.reactome.org/PathwayBrowser/#/R-CEL-211979	Eicosanoids	1	3
O61204	R-CEL-211957	http://www.reactome.org/PathwayBrowser/#/R-CEL-211957	Aromatic amines can be N-hydroxylated or N-dealkylated by CYP1A2	IEA	Caenorhabditis elegans	10	0	0	1		10	O62377	R-CEL-193993	http://www.reactome.org/PathwayBrowser/#/R-CEL-193993	Mineralocorticoid biosynthesis	0											2	Q27519	R-CEL-211979	http://www.reactome.org/PathwayBrowser/#/R-CEL-211979	Eicosanoids	0
Q27471	R-CEL-211957	http://www.reactome.org/PathwayBrowser/#/R-CEL-211957	Aromatic amines can be N-hydroxylated or N-dealkylated by CYP1A2	IEA	Caenorhabditis elegans	10	0	0	1		10	O44706	R-CEL-193993	http://www.reactome.org/PathwayBrowser/#/R-CEL-193993	Mineralocorticoid biosynthesis	0											2	Q9XUT8	R-CEL-211979	http://www.reactome.org/PathwayBrowser/#/R-CEL-211979	Eicosanoids	0
Q27505	R-CEL-211957	http://www.reactome.org/PathwayBrowser/#/R-CEL-211957	Aromatic amines can be N-hydroxylated or N-dealkylated by CYP1A2	IEA	Caenorhabditis elegans	10	0	0	1		10	O02641	R-CEL-193993	http://www.reactome.org/PathwayBrowser/#/R-CEL-193993	Mineralocorticoid biosynthesis	0											10	O45364	R-CEL-211981	http://www.reactome.org/PathwayBrowser/#/R-CEL-211981	Xenobiotics	1	14
Q27506	R-CEL-211957	http://www.reactome.org/PathwayBrowser/#/R-CEL-211957	Aromatic amines can be N-hydroxylated or N-dealkylated by CYP1A2	IEA	Caenorhabditis elegans	10	0	0	1		10	O62378	R-CEL-193993	http://www.reactome.org/PathwayBrowser/#/R-CEL-193993	Mineralocorticoid biosynthesis	0											10	O62377	R-CEL-211981	http://www.reactome.org/PathwayBrowser/#/R-CEL-211981	Xenobiotics	0
Q27507	R-CEL-211957	http://www.reactome.org/PathwayBrowser/#/R-CEL-211957	Aromatic amines can be N-hydroxylated or N-dealkylated by CYP1A2	IEA	Caenorhabditis elegans	10	0	0	1		10	P90771	R-CEL-193993	http://www.reactome.org/PathwayBrowser/#/R-CEL-193993	Mineralocorticoid biosynthesis	0											10	O02627	R-CEL-211981	http://www.reactome.org/PathwayBrowser/#/R-CEL-211981	Xenobiotics	0
G5ECD0	R-CEL-211976	http://www.reactome.org/PathwayBrowser/#/R-CEL-211976	Endogenous sterols	IEA	Caenorhabditis elegans	10	0	0	1		10	Q27531	R-CEL-193993	http://www.reactome.org/PathwayBrowser/#/R-CEL-193993	Mineralocorticoid biosynthesis	0											10	O44649	R-CEL-211981	http://www.reactome.org/PathwayBrowser/#/R-CEL-211981	Xenobiotics	0
O02628	R-CEL-211976	http://www.reactome.org/PathwayBrowser/#/R-CEL-211976	Endogenous sterols	IEA	Caenorhabditis elegans	10	0	0	1		10	O44650	R-CEL-194002	http://www.reactome.org/PathwayBrowser/#/R-CEL-194002	Glucocorticoid biosynthesis	1	8										10	Q9N5I1	R-CEL-211981	http://www.reactome.org/PathwayBrowser/#/R-CEL-211981	Xenobiotics	0
O16220	R-CEL-211976	http://www.reactome.org/PathwayBrowser/#/R-CEL-211976	Endogenous sterols	IEA	Caenorhabditis elegans	10	0	0	1		10	O45364	R-CEL-194002	http://www.reactome.org/PathwayBrowser/#/R-CEL-194002	Glucocorticoid biosynthesis	0											10	G5ECD0	R-CEL-211981	http://www.reactome.org/PathwayBrowser/#/R-CEL-211981	Xenobiotics	0
O16670	R-CEL-211976	http://www.reactome.org/PathwayBrowser/#/R-CEL-211976	Endogenous sterols	IEA	Caenorhabditis elegans	10	0	0	1		10	O62377	R-CEL-194002	http://www.reactome.org/PathwayBrowser/#/R-CEL-194002	Glucocorticoid biosynthesis	0											10	O02628	R-CEL-211981	http://www.reactome.org/PathwayBrowser/#/R-CEL-211981	Xenobiotics	0
O61204	R-CEL-211976	http://www.reactome.org/PathwayBrowser/#/R-CEL-211976	Endogenous sterols	IEA	Caenorhabditis elegans	10	0	0	1		10	O44706	R-CEL-194002	http://www.reactome.org/PathwayBrowser/#/R-CEL-194002	Glucocorticoid biosynthesis	0											10	O16220	R-CEL-211981	http://www.reactome.org/PathwayBrowser/#/R-CEL-211981	Xenobiotics	0
Q27471	R-CEL-211976	http://www.reactome.org/PathwayBrowser/#/R-CEL-211976	Endogenous sterols	IEA	Caenorhabditis elegans	10	0	0	1		10	O02641	R-CEL-194002	http://www.reactome.org/PathwayBrowser/#/R-CEL-194002	Glucocorticoid biosynthesis	0											10	O16670	R-CEL-211981	http://www.reactome.org/PathwayBrowser/#/R-CEL-211981	Xenobiotics	0
Q27505	R-CEL-211976	http://www.reactome.org/PathwayBrowser/#/R-CEL-211976	Endogenous sterols	IEA	Caenorhabditis elegans	10	0	0	1		10	O62378	R-CEL-194002	http://www.reactome.org/PathwayBrowser/#/R-CEL-194002	Glucocorticoid biosynthesis	0											10	O61204	R-CEL-211981	http://www.reactome.org/PathwayBrowser/#/R-CEL-211981	Xenobiotics	0
Q27506	R-CEL-211976	http://www.reactome.org/PathwayBrowser/#/R-CEL-211976	Endogenous sterols	IEA	Caenorhabditis elegans	10	0	0	1		10	P90771	R-CEL-194002	http://www.reactome.org/PathwayBrowser/#/R-CEL-194002	Glucocorticoid biosynthesis	0											10	Q27471	R-CEL-211981	http://www.reactome.org/PathwayBrowser/#/R-CEL-211981	Xenobiotics	0
Q27507	R-CEL-211976	http://www.reactome.org/PathwayBrowser/#/R-CEL-211976	Endogenous sterols	IEA	Caenorhabditis elegans	10	0	0	1		10	Q27531	R-CEL-194002	http://www.reactome.org/PathwayBrowser/#/R-CEL-194002	Glucocorticoid biosynthesis	0											10	Q27505	R-CEL-211981	http://www.reactome.org/PathwayBrowser/#/R-CEL-211981	Xenobiotics	0
O18693	R-CEL-75105	http://www.reactome.org/PathwayBrowser/#/R-CEL-75105	Fatty Acyl-CoA Biosynthesis	IEA	Caenorhabditis elegans	1	0	0	1		1	Q21515	R-CEL-194223	http://www.reactome.org/PathwayBrowser/#/R-CEL-194223	HDL-mediated lipid transport	1	1										10	Q27506	R-CEL-211981	http://www.reactome.org/PathwayBrowser/#/R-CEL-211981	Xenobiotics	0
G5ECD0	R-CEL-194002	http://www.reactome.org/PathwayBrowser/#/R-CEL-194002	Glucocorticoid biosynthesis	IEA	Caenorhabditis elegans	10	0	0	1		3	Q21653	R-CEL-194840	http://www.reactome.org/PathwayBrowser/#/R-CEL-194840	Rho GTPase cycle	1	3										10	Q27507	R-CEL-211981	http://www.reactome.org/PathwayBrowser/#/R-CEL-211981	Xenobiotics	0
O02628	R-CEL-194002	http://www.reactome.org/PathwayBrowser/#/R-CEL-194002	Glucocorticoid biosynthesis	IEA	Caenorhabditis elegans	10	0	0	1		5	O01847	R-CEL-194840	http://www.reactome.org/PathwayBrowser/#/R-CEL-194840	Rho GTPase cycle	0											10	O45364	R-CEL-2142670	http://www.reactome.org/PathwayBrowser/#/R-CEL-2142670	Synthesis of epoxy (EET) and dihydroxyeicosatrienoic acids (DHET)	1	14
O16220	R-CEL-194002	http://www.reactome.org/PathwayBrowser/#/R-CEL-194002	Glucocorticoid biosynthesis	IEA	Caenorhabditis elegans	10	0	0	1		6	Q21430	R-CEL-194840	http://www.reactome.org/PathwayBrowser/#/R-CEL-194840	Rho GTPase cycle	0											10	O62377	R-CEL-2142670	http://www.reactome.org/PathwayBrowser/#/R-CEL-2142670	Synthesis of epoxy (EET) and dihydroxyeicosatrienoic acids (DHET)	0
O16670	R-CEL-194002	http://www.reactome.org/PathwayBrowser/#/R-CEL-194002	Glucocorticoid biosynthesis	IEA	Caenorhabditis elegans	10	0	0	1		6	G5EEX4	R-CEL-195253	http://www.reactome.org/PathwayBrowser/#/R-CEL-195253	Degradation of beta-catenin by the destruction complex	1	3										10	O02627	R-CEL-2142670	http://www.reactome.org/PathwayBrowser/#/R-CEL-2142670	Synthesis of epoxy (EET) and dihydroxyeicosatrienoic acids (DHET)	0
O61204	R-CEL-194002	http://www.reactome.org/PathwayBrowser/#/R-CEL-194002	Glucocorticoid biosynthesis	IEA	Caenorhabditis elegans	10	0	0	1		6	G5EFA9	R-CEL-195253	http://www.reactome.org/PathwayBrowser/#/R-CEL-195253	Degradation of beta-catenin by the destruction complex	0											10	O44649	R-CEL-2142670	http://www.reactome.org/PathwayBrowser/#/R-CEL-2142670	Synthesis of epoxy (EET) and dihydroxyeicosatrienoic acids (DHET)	0
Q27471	R-CEL-194002	http://www.reactome.org/PathwayBrowser/#/R-CEL-194002	Glucocorticoid biosynthesis	IEA	Caenorhabditis elegans	10	0	0	1		6	G5EG39	R-CEL-195253	http://www.reactome.org/PathwayBrowser/#/R-CEL-195253	Degradation of beta-catenin by the destruction complex	0											10	Q9N5I1	R-CEL-2142670	http://www.reactome.org/PathwayBrowser/#/R-CEL-2142670	Synthesis of epoxy (EET) and dihydroxyeicosatrienoic acids (DHET)	0
Q27505	R-CEL-194002	http://www.reactome.org/PathwayBrowser/#/R-CEL-194002	Glucocorticoid biosynthesis	IEA	Caenorhabditis elegans	10	0	0	1		6	O44616	R-CEL-196836	http://www.reactome.org/PathwayBrowser/#/R-CEL-196836	Vitamin C (ascorbate) metabolism	1	1										10	G5ECD0	R-CEL-2142670	http://www.reactome.org/PathwayBrowser/#/R-CEL-2142670	Synthesis of epoxy (EET) and dihydroxyeicosatrienoic acids (DHET)	0
Q27506	R-CEL-194002	http://www.reactome.org/PathwayBrowser/#/R-CEL-194002	Glucocorticoid biosynthesis	IEA	Caenorhabditis elegans	10	0	0	1		5	G5EGU4	R-CEL-1971475	http://www.reactome.org/PathwayBrowser/#/R-CEL-1971475	A tetrasaccharide linker sequence is required for GAG synthesis	1	2										10	O02628	R-CEL-2142670	http://www.reactome.org/PathwayBrowser/#/R-CEL-2142670	Synthesis of epoxy (EET) and dihydroxyeicosatrienoic acids (DHET)	0
Q27507	R-CEL-194002	http://www.reactome.org/PathwayBrowser/#/R-CEL-194002	Glucocorticoid biosynthesis	IEA	Caenorhabditis elegans	10	0	0	1		7	Q22574	R-CEL-1971475	http://www.reactome.org/PathwayBrowser/#/R-CEL-1971475	A tetrasaccharide linker sequence is required for GAG synthesis	0											10	O16220	R-CEL-2142670	http://www.reactome.org/PathwayBrowser/#/R-CEL-2142670	Synthesis of epoxy (EET) and dihydroxyeicosatrienoic acids (DHET)	0
P34345	R-CEL-156590	http://www.reactome.org/PathwayBrowser/#/R-CEL-156590	Glutathione conjugation	IEA	Caenorhabditis elegans	3	0	0	1		3	Q22324	R-CEL-198323	http://www.reactome.org/PathwayBrowser/#/R-CEL-198323	AKT phosphorylates targets in the cytosol	1	1										10	O16670	R-CEL-2142670	http://www.reactome.org/PathwayBrowser/#/R-CEL-2142670	Synthesis of epoxy (EET) and dihydroxyeicosatrienoic acids (DHET)	0
G5ECD0	R-CEL-156581	http://www.reactome.org/PathwayBrowser/#/R-CEL-156581	Methylation	IEA	Caenorhabditis elegans	10	0	0	1		1	P41829	R-CEL-198693	http://www.reactome.org/PathwayBrowser/#/R-CEL-198693	AKT phosphorylates targets in the nucleus	1	1										10	O61204	R-CEL-2142670	http://www.reactome.org/PathwayBrowser/#/R-CEL-2142670	Synthesis of epoxy (EET) and dihydroxyeicosatrienoic acids (DHET)	0
O02628	R-CEL-156581	http://www.reactome.org/PathwayBrowser/#/R-CEL-156581	Methylation	IEA	Caenorhabditis elegans	10	0	0	1		3	G5EED4	R-CEL-199418	http://www.reactome.org/PathwayBrowser/#/R-CEL-199418	Negative regulation of the PI3K/AKT network	1	1										10	Q27471	R-CEL-2142670	http://www.reactome.org/PathwayBrowser/#/R-CEL-2142670	Synthesis of epoxy (EET) and dihydroxyeicosatrienoic acids (DHET)	0
O16220	R-CEL-156581	http://www.reactome.org/PathwayBrowser/#/R-CEL-156581	Methylation	IEA	Caenorhabditis elegans	10	0	0	1		1	P45896	R-CEL-201451	http://www.reactome.org/PathwayBrowser/#/R-CEL-201451	Signaling by BMP	1	1										10	Q27505	R-CEL-2142670	http://www.reactome.org/PathwayBrowser/#/R-CEL-2142670	Synthesis of epoxy (EET) and dihydroxyeicosatrienoic acids (DHET)	0
O16670	R-CEL-156581	http://www.reactome.org/PathwayBrowser/#/R-CEL-156581	Methylation	IEA	Caenorhabditis elegans	10	0	0	1		3	Q27526	R-CEL-2022857	http://www.reactome.org/PathwayBrowser/#/R-CEL-2022857	Keratan sulfate degradation	1	1										10	Q27506	R-CEL-2142670	http://www.reactome.org/PathwayBrowser/#/R-CEL-2142670	Synthesis of epoxy (EET) and dihydroxyeicosatrienoic acids (DHET)	0
O61204	R-CEL-156581	http://www.reactome.org/PathwayBrowser/#/R-CEL-156581	Methylation	IEA	Caenorhabditis elegans	10	0	0	1		5	G5EGU4	R-CEL-2022928	http://www.reactome.org/PathwayBrowser/#/R-CEL-2022928	HS-GAG biosynthesis	1	2										10	Q27507	R-CEL-2142670	http://www.reactome.org/PathwayBrowser/#/R-CEL-2142670	Synthesis of epoxy (EET) and dihydroxyeicosatrienoic acids (DHET)	0
P34345	R-CEL-156581	http://www.reactome.org/PathwayBrowser/#/R-CEL-156581	Methylation	IEA	Caenorhabditis elegans	3	0	0	1		7	Q22574	R-CEL-2022928	http://www.reactome.org/PathwayBrowser/#/R-CEL-2022928	HS-GAG biosynthesis	0											10	O45364	R-CEL-2142816	http://www.reactome.org/PathwayBrowser/#/R-CEL-2142816	Synthesis of (16-20)-hydroxyeicosatetraenoic acids (HETE)	1	14
Q27471	R-CEL-156581	http://www.reactome.org/PathwayBrowser/#/R-CEL-156581	Methylation	IEA	Caenorhabditis elegans	10	0	0	1		5	G5EGU4	R-CEL-2024096	http://www.reactome.org/PathwayBrowser/#/R-CEL-2024096	HS-GAG degradation	1	3										10	O62377	R-CEL-2142816	http://www.reactome.org/PathwayBrowser/#/R-CEL-2142816	Synthesis of (16-20)-hydroxyeicosatetraenoic acids (HETE)	0
Q27505	R-CEL-156581	http://www.reactome.org/PathwayBrowser/#/R-CEL-156581	Methylation	IEA	Caenorhabditis elegans	10	0	0	1		7	Q22574	R-CEL-2024096	http://www.reactome.org/PathwayBrowser/#/R-CEL-2024096	HS-GAG degradation	0											10	O02627	R-CEL-2142816	http://www.reactome.org/PathwayBrowser/#/R-CEL-2142816	Synthesis of (16-20)-hydroxyeicosatetraenoic acids (HETE)	0
Q27506	R-CEL-156581	http://www.reactome.org/PathwayBrowser/#/R-CEL-156581	Methylation	IEA	Caenorhabditis elegans	10	0	0	1		3	Q27526	R-CEL-2024096	http://www.reactome.org/PathwayBrowser/#/R-CEL-2024096	HS-GAG degradation	0											10	O44649	R-CEL-2142816	http://www.reactome.org/PathwayBrowser/#/R-CEL-2142816	Synthesis of (16-20)-hydroxyeicosatetraenoic acids (HETE)	0
Q27507	R-CEL-156581	http://www.reactome.org/PathwayBrowser/#/R-CEL-156581	Methylation	IEA	Caenorhabditis elegans	10	0	0	1		4	Q20500	R-CEL-2029485	http://www.reactome.org/PathwayBrowser/#/R-CEL-2029485	Role of phospholipids in phagocytosis	1	1										10	Q9N5I1	R-CEL-2142816	http://www.reactome.org/PathwayBrowser/#/R-CEL-2142816	Synthesis of (16-20)-hydroxyeicosatetraenoic acids (HETE)	0
G5ECD0	R-CEL-193993	http://www.reactome.org/PathwayBrowser/#/R-CEL-193993	Mineralocorticoid biosynthesis	IEA	Caenorhabditis elegans	10	0	0	1		4	P41941	R-CEL-204005	http://www.reactome.org/PathwayBrowser/#/R-CEL-204005	COPII (Coat Protein 2) Mediated Vesicle Transport	1	1										10	G5ECD0	R-CEL-2142816	http://www.reactome.org/PathwayBrowser/#/R-CEL-2142816	Synthesis of (16-20)-hydroxyeicosatetraenoic acids (HETE)	0
O02628	R-CEL-193993	http://www.reactome.org/PathwayBrowser/#/R-CEL-193993	Mineralocorticoid biosynthesis	IEA	Caenorhabditis elegans	10	0	0	1		4	O45730	R-CEL-2046105	http://www.reactome.org/PathwayBrowser/#/R-CEL-2046105	Linoleic acid (LA) metabolism	1	2										10	O02628	R-CEL-2142816	http://www.reactome.org/PathwayBrowser/#/R-CEL-2142816	Synthesis of (16-20)-hydroxyeicosatetraenoic acids (HETE)	0
O16220	R-CEL-193993	http://www.reactome.org/PathwayBrowser/#/R-CEL-193993	Mineralocorticoid biosynthesis	IEA	Caenorhabditis elegans	10	0	0	1		3	Q9XWD1	R-CEL-2046105	http://www.reactome.org/PathwayBrowser/#/R-CEL-2046105	Linoleic acid (LA) metabolism	0											10	O16220	R-CEL-2142816	http://www.reactome.org/PathwayBrowser/#/R-CEL-2142816	Synthesis of (16-20)-hydroxyeicosatetraenoic acids (HETE)	0
O16670	R-CEL-193993	http://www.reactome.org/PathwayBrowser/#/R-CEL-193993	Mineralocorticoid biosynthesis	IEA	Caenorhabditis elegans	10	0	0	1		3	G5EDP2	R-CEL-2046106	http://www.reactome.org/PathwayBrowser/#/R-CEL-2046106	alpha-linolenic acid (ALA) metabolism	1	4										10	O16670	R-CEL-2142816	http://www.reactome.org/PathwayBrowser/#/R-CEL-2142816	Synthesis of (16-20)-hydroxyeicosatetraenoic acids (HETE)	0
O61204	R-CEL-193993	http://www.reactome.org/PathwayBrowser/#/R-CEL-193993	Mineralocorticoid biosynthesis	IEA	Caenorhabditis elegans	10	0	0	1		4	O45730	R-CEL-2046106	http://www.reactome.org/PathwayBrowser/#/R-CEL-2046106	alpha-linolenic acid (ALA) metabolism	0											10	O61204	R-CEL-2142816	http://www.reactome.org/PathwayBrowser/#/R-CEL-2142816	Synthesis of (16-20)-hydroxyeicosatetraenoic acids (HETE)	0
Q27471	R-CEL-193993	http://www.reactome.org/PathwayBrowser/#/R-CEL-193993	Mineralocorticoid biosynthesis	IEA	Caenorhabditis elegans	10	0	0	1		5	Q9U1Q5	R-CEL-2046106	http://www.reactome.org/PathwayBrowser/#/R-CEL-2046106	alpha-linolenic acid (ALA) metabolism	0											10	Q27471	R-CEL-2142816	http://www.reactome.org/PathwayBrowser/#/R-CEL-2142816	Synthesis of (16-20)-hydroxyeicosatetraenoic acids (HETE)	0
Q27505	R-CEL-193993	http://www.reactome.org/PathwayBrowser/#/R-CEL-193993	Mineralocorticoid biosynthesis	IEA	Caenorhabditis elegans	10	0	0	1		3	Q9XWD1	R-CEL-2046106	http://www.reactome.org/PathwayBrowser/#/R-CEL-2046106	alpha-linolenic acid (ALA) metabolism	0											10	Q27505	R-CEL-2142816	http://www.reactome.org/PathwayBrowser/#/R-CEL-2142816	Synthesis of (16-20)-hydroxyeicosatetraenoic acids (HETE)	0
Q27506	R-CEL-193993	http://www.reactome.org/PathwayBrowser/#/R-CEL-193993	Mineralocorticoid biosynthesis	IEA	Caenorhabditis elegans	10	0	0	1		2	G5EEK1	R-CEL-210500	http://www.reactome.org/PathwayBrowser/#/R-CEL-210500	Glutamate Neurotransmitter Release Cycle	1	2										10	Q27506	R-CEL-2142816	http://www.reactome.org/PathwayBrowser/#/R-CEL-2142816	Synthesis of (16-20)-hydroxyeicosatetraenoic acids (HETE)	0
Q27507	R-CEL-193993	http://www.reactome.org/PathwayBrowser/#/R-CEL-193993	Mineralocorticoid biosynthesis	IEA	Caenorhabditis elegans	10	0	0	1		2	K8FE10	R-CEL-210500	http://www.reactome.org/PathwayBrowser/#/R-CEL-210500	Glutamate Neurotransmitter Release Cycle	0											10	Q27507	R-CEL-2142816	http://www.reactome.org/PathwayBrowser/#/R-CEL-2142816	Synthesis of (16-20)-hydroxyeicosatetraenoic acids (HETE)	0
O45220	R-CEL-427652	http://www.reactome.org/PathwayBrowser/#/R-CEL-427652	Sodium-coupled phosphate cotransporters	IEA	Caenorhabditis elegans	1	0	0	1		2	Q9XWL5	R-CEL-211945	http://www.reactome.org/PathwayBrowser/#/R-CEL-211945	Phase 1 - Functionalization of compounds	1	1										2	Q27515	R-CEL-2162123	http://www.reactome.org/PathwayBrowser/#/R-CEL-2162123	Synthesis of Prostaglandins (PG) and Thromboxanes (TX)	1	3
G5ECD0	R-CEL-2142816	http://www.reactome.org/PathwayBrowser/#/R-CEL-2142816	Synthesis of (16-20)-hydroxyeicosatetraenoic acids (HETE)	IEA	Caenorhabditis elegans	10	0	0	1		10	O44650	R-CEL-211957	http://www.reactome.org/PathwayBrowser/#/R-CEL-211957	Aromatic amines can be N-hydroxylated or N-dealkylated by CYP1A2	1	8										2	Q27519	R-CEL-2162123	http://www.reactome.org/PathwayBrowser/#/R-CEL-2162123	Synthesis of Prostaglandins (PG) and Thromboxanes (TX)	0
O02628	R-CEL-2142816	http://www.reactome.org/PathwayBrowser/#/R-CEL-2142816	Synthesis of (16-20)-hydroxyeicosatetraenoic acids (HETE)	IEA	Caenorhabditis elegans	10	0	0	1		10	O45364	R-CEL-211957	http://www.reactome.org/PathwayBrowser/#/R-CEL-211957	Aromatic amines can be N-hydroxylated or N-dealkylated by CYP1A2	0											2	Q9XUT8	R-CEL-2162123	http://www.reactome.org/PathwayBrowser/#/R-CEL-2162123	Synthesis of Prostaglandins (PG) and Thromboxanes (TX)	0
O16220	R-CEL-2142816	http://www.reactome.org/PathwayBrowser/#/R-CEL-2142816	Synthesis of (16-20)-hydroxyeicosatetraenoic acids (HETE)	IEA	Caenorhabditis elegans	10	0	0	1		10	O62377	R-CEL-211957	http://www.reactome.org/PathwayBrowser/#/R-CEL-211957	Aromatic amines can be N-hydroxylated or N-dealkylated by CYP1A2	0											1	G5EBJ9	R-CEL-217271	http://www.reactome.org/PathwayBrowser/#/R-CEL-217271	FMO oxidises nucleophiles	1	1
O16670	R-CEL-2142816	http://www.reactome.org/PathwayBrowser/#/R-CEL-2142816	Synthesis of (16-20)-hydroxyeicosatetraenoic acids (HETE)	IEA	Caenorhabditis elegans	10	0	0	1		10	O44706	R-CEL-211957	http://www.reactome.org/PathwayBrowser/#/R-CEL-211957	Aromatic amines can be N-hydroxylated or N-dealkylated by CYP1A2	0											4	Q9NAC6	R-CEL-2426168	http://www.reactome.org/PathwayBrowser/#/R-CEL-2426168	Activation of gene expression by SREBF (SREBP)	1	1
O61204	R-CEL-2142816	http://www.reactome.org/PathwayBrowser/#/R-CEL-2142816	Synthesis of (16-20)-hydroxyeicosatetraenoic acids (HETE)	IEA	Caenorhabditis elegans	10	0	0	1		10	O02641	R-CEL-211957	http://www.reactome.org/PathwayBrowser/#/R-CEL-211957	Aromatic amines can be N-hydroxylated or N-dealkylated by CYP1A2	0											2	Q9U2E4	R-CEL-2453902	http://www.reactome.org/PathwayBrowser/#/R-CEL-2453902	The canonical retinoid cycle in rods (twilight vision)	1	1
Q27471	R-CEL-2142816	http://www.reactome.org/PathwayBrowser/#/R-CEL-2142816	Synthesis of (16-20)-hydroxyeicosatetraenoic acids (HETE)	IEA	Caenorhabditis elegans	10	0	0	1		10	O62378	R-CEL-211957	http://www.reactome.org/PathwayBrowser/#/R-CEL-211957	Aromatic amines can be N-hydroxylated or N-dealkylated by CYP1A2	0											2	O61750	R-CEL-3299685	http://www.reactome.org/PathwayBrowser/#/R-CEL-3299685	Detoxification of Reactive Oxygen Species	1	1
Q27505	R-CEL-2142816	http://www.reactome.org/PathwayBrowser/#/R-CEL-2142816	Synthesis of (16-20)-hydroxyeicosatetraenoic acids (HETE)	IEA	Caenorhabditis elegans	10	0	0	1		10	P90771	R-CEL-211957	http://www.reactome.org/PathwayBrowser/#/R-CEL-211957	Aromatic amines can be N-hydroxylated or N-dealkylated by CYP1A2	0											2	Q9XX44	R-CEL-352230	http://www.reactome.org/PathwayBrowser/#/R-CEL-352230	Amino acid transport across the plasma membrane	1	1
Q27506	R-CEL-2142816	http://www.reactome.org/PathwayBrowser/#/R-CEL-2142816	Synthesis of (16-20)-hydroxyeicosatetraenoic acids (HETE)	IEA	Caenorhabditis elegans	10	0	0	1		10	Q27531	R-CEL-211957	http://www.reactome.org/PathwayBrowser/#/R-CEL-211957	Aromatic amines can be N-hydroxylated or N-dealkylated by CYP1A2	0											1	O45220	R-CEL-427652	http://www.reactome.org/PathwayBrowser/#/R-CEL-427652	Sodium-coupled phosphate cotransporters	1	1
Q27507	R-CEL-2142816	http://www.reactome.org/PathwayBrowser/#/R-CEL-2142816	Synthesis of (16-20)-hydroxyeicosatetraenoic acids (HETE)	IEA	Caenorhabditis elegans	10	0	0	1		10	O44650	R-CEL-211976	http://www.reactome.org/PathwayBrowser/#/R-CEL-211976	Endogenous sterols	1	9										2	Q9XX44	R-CEL-428559	http://www.reactome.org/PathwayBrowser/#/R-CEL-428559	Proton-coupled neutral amino acid transporters	1	1
G5ECD0	R-CEL-2142670	http://www.reactome.org/PathwayBrowser/#/R-CEL-2142670	Synthesis of epoxy (EET) and dihydroxyeicosatrienoic acids (DHET)	IEA	Caenorhabditis elegans	10	0	0	1		10	O45364	R-CEL-211976	http://www.reactome.org/PathwayBrowser/#/R-CEL-211976	Endogenous sterols	0											10	O45364	R-CEL-5423646	http://www.reactome.org/PathwayBrowser/#/R-CEL-5423646	Aflatoxin activation and detoxification	1	14
O02628	R-CEL-2142670	http://www.reactome.org/PathwayBrowser/#/R-CEL-2142670	Synthesis of epoxy (EET) and dihydroxyeicosatrienoic acids (DHET)	IEA	Caenorhabditis elegans	10	0	0	1		10	O62377	R-CEL-211976	http://www.reactome.org/PathwayBrowser/#/R-CEL-211976	Endogenous sterols	0											10	O62377	R-CEL-5423646	http://www.reactome.org/PathwayBrowser/#/R-CEL-5423646	Aflatoxin activation and detoxification	0
O16220	R-CEL-2142670	http://www.reactome.org/PathwayBrowser/#/R-CEL-2142670	Synthesis of epoxy (EET) and dihydroxyeicosatrienoic acids (DHET)	IEA	Caenorhabditis elegans	10	0	0	1		10	O44706	R-CEL-211976	http://www.reactome.org/PathwayBrowser/#/R-CEL-211976	Endogenous sterols	0											10	O02627	R-CEL-5423646	http://www.reactome.org/PathwayBrowser/#/R-CEL-5423646	Aflatoxin activation and detoxification	0
O16670	R-CEL-2142670	http://www.reactome.org/PathwayBrowser/#/R-CEL-2142670	Synthesis of epoxy (EET) and dihydroxyeicosatrienoic acids (DHET)	IEA	Caenorhabditis elegans	10	0	0	1		10	O02641	R-CEL-211976	http://www.reactome.org/PathwayBrowser/#/R-CEL-211976	Endogenous sterols	0											10	O44649	R-CEL-5423646	http://www.reactome.org/PathwayBrowser/#/R-CEL-5423646	Aflatoxin activation and detoxification	0
O61204	R-CEL-2142670	http://www.reactome.org/PathwayBrowser/#/R-CEL-2142670	Synthesis of epoxy (EET) and dihydroxyeicosatrienoic acids (DHET)	IEA	Caenorhabditis elegans	10	0	0	1		2	O17851	R-CEL-211976	http://www.reactome.org/PathwayBrowser/#/R-CEL-211976	Endogenous sterols	0											10	Q9N5I1	R-CEL-5423646	http://www.reactome.org/PathwayBrowser/#/R-CEL-5423646	Aflatoxin activation and detoxification	0
Q27471	R-CEL-2142670	http://www.reactome.org/PathwayBrowser/#/R-CEL-2142670	Synthesis of epoxy (EET) and dihydroxyeicosatrienoic acids (DHET)	IEA	Caenorhabditis elegans	10	0	0	1		10	O62378	R-CEL-211976	http://www.reactome.org/PathwayBrowser/#/R-CEL-211976	Endogenous sterols	0											10	G5ECD0	R-CEL-5423646	http://www.reactome.org/PathwayBrowser/#/R-CEL-5423646	Aflatoxin activation and detoxification	0
Q27505	R-CEL-2142670	http://www.reactome.org/PathwayBrowser/#/R-CEL-2142670	Synthesis of epoxy (EET) and dihydroxyeicosatrienoic acids (DHET)	IEA	Caenorhabditis elegans	10	0	0	1		10	P90771	R-CEL-211976	http://www.reactome.org/PathwayBrowser/#/R-CEL-211976	Endogenous sterols	0											10	O02628	R-CEL-5423646	http://www.reactome.org/PathwayBrowser/#/R-CEL-5423646	Aflatoxin activation and detoxification	0
Q27506	R-CEL-2142670	http://www.reactome.org/PathwayBrowser/#/R-CEL-2142670	Synthesis of epoxy (EET) and dihydroxyeicosatrienoic acids (DHET)	IEA	Caenorhabditis elegans	10	0	0	1		10	Q27531	R-CEL-211976	http://www.reactome.org/PathwayBrowser/#/R-CEL-211976	Endogenous sterols	0											10	O16220	R-CEL-5423646	http://www.reactome.org/PathwayBrowser/#/R-CEL-5423646	Aflatoxin activation and detoxification	0
Q27507	R-CEL-2142670	http://www.reactome.org/PathwayBrowser/#/R-CEL-2142670	Synthesis of epoxy (EET) and dihydroxyeicosatrienoic acids (DHET)	IEA	Caenorhabditis elegans	10	0	0	1		2	Q27513	R-CEL-211979	http://www.reactome.org/PathwayBrowser/#/R-CEL-211979	Eicosanoids	1	3										10	O16670	R-CEL-5423646	http://www.reactome.org/PathwayBrowser/#/R-CEL-5423646	Aflatoxin activation and detoxification	0
P34345	R-CEL-196836	http://www.reactome.org/PathwayBrowser/#/R-CEL-196836	Vitamin C (ascorbate) metabolism	IEA	Caenorhabditis elegans	3	0	0	1		2	Q27517	R-CEL-211979	http://www.reactome.org/PathwayBrowser/#/R-CEL-211979	Eicosanoids	0											10	O61204	R-CEL-5423646	http://www.reactome.org/PathwayBrowser/#/R-CEL-5423646	Aflatoxin activation and detoxification	0
G5ECD0	R-CEL-211981	http://www.reactome.org/PathwayBrowser/#/R-CEL-211981	Xenobiotics	IEA	Caenorhabditis elegans	10	0	0	1		2	Q27520	R-CEL-211979	http://www.reactome.org/PathwayBrowser/#/R-CEL-211979	Eicosanoids	0											10	Q27471	R-CEL-5423646	http://www.reactome.org/PathwayBrowser/#/R-CEL-5423646	Aflatoxin activation and detoxification	0
O02628	R-CEL-211981	http://www.reactome.org/PathwayBrowser/#/R-CEL-211981	Xenobiotics	IEA	Caenorhabditis elegans	10	0	0	1		10	O44650	R-CEL-211981	http://www.reactome.org/PathwayBrowser/#/R-CEL-211981	Xenobiotics	1	8										10	Q27505	R-CEL-5423646	http://www.reactome.org/PathwayBrowser/#/R-CEL-5423646	Aflatoxin activation and detoxification	0
O16220	R-CEL-211981	http://www.reactome.org/PathwayBrowser/#/R-CEL-211981	Xenobiotics	IEA	Caenorhabditis elegans	10	0	0	1		10	O45364	R-CEL-211981	http://www.reactome.org/PathwayBrowser/#/R-CEL-211981	Xenobiotics	0											10	Q27506	R-CEL-5423646	http://www.reactome.org/PathwayBrowser/#/R-CEL-5423646	Aflatoxin activation and detoxification	0
O16670	R-CEL-211981	http://www.reactome.org/PathwayBrowser/#/R-CEL-211981	Xenobiotics	IEA	Caenorhabditis elegans	10	0	0	1		10	O62377	R-CEL-211981	http://www.reactome.org/PathwayBrowser/#/R-CEL-211981	Xenobiotics	0											10	Q27507	R-CEL-5423646	http://www.reactome.org/PathwayBrowser/#/R-CEL-5423646	Aflatoxin activation and detoxification	0
O61204	R-CEL-211981	http://www.reactome.org/PathwayBrowser/#/R-CEL-211981	Xenobiotics	IEA	Caenorhabditis elegans	10	0	0	1		10	O44706	R-CEL-211981	http://www.reactome.org/PathwayBrowser/#/R-CEL-211981	Xenobiotics	0											1	Q18898	R-CEL-6811438	http://www.reactome.org/PathwayBrowser/#/R-CEL-6811438	Intra-Golgi traffic	1	1
Q27471	R-CEL-211981	http://www.reactome.org/PathwayBrowser/#/R-CEL-211981	Xenobiotics	IEA	Caenorhabditis elegans	10	0	0	1		10	O02641	R-CEL-211981	http://www.reactome.org/PathwayBrowser/#/R-CEL-211981	Xenobiotics	0											1	O45518	R-CEL-71288	http://www.reactome.org/PathwayBrowser/#/R-CEL-71288	Creatine metabolism	1	1
Q27505	R-CEL-211981	http://www.reactome.org/PathwayBrowser/#/R-CEL-211981	Xenobiotics	IEA	Caenorhabditis elegans	10	0	0	1		10	O62378	R-CEL-211981	http://www.reactome.org/PathwayBrowser/#/R-CEL-211981	Xenobiotics	0											1	O18693	R-CEL-75105	http://www.reactome.org/PathwayBrowser/#/R-CEL-75105	Fatty Acyl-CoA Biosynthesis	1	1
Q27506	R-CEL-211981	http://www.reactome.org/PathwayBrowser/#/R-CEL-211981	Xenobiotics	IEA	Caenorhabditis elegans	10	0	0	1		10	P90771	R-CEL-211981	http://www.reactome.org/PathwayBrowser/#/R-CEL-211981	Xenobiotics	0											4	Q9NAC6	R-CEL-75876	http://www.reactome.org/PathwayBrowser/#/R-CEL-75876	Synthesis of very long-chain fatty acyl-CoAs	1	1
Q27507	R-CEL-211981	http://www.reactome.org/PathwayBrowser/#/R-CEL-211981	Xenobiotics	IEA	Caenorhabditis elegans	10	0	0	1		10	Q27531	R-CEL-211981	http://www.reactome.org/PathwayBrowser/#/R-CEL-211981	Xenobiotics	0											2	Q9U2E4	R-CEL-975634	http://www.reactome.org/PathwayBrowser/#/R-CEL-975634	Retinoid metabolism and transport	1	1
O44650	R-CEL-5423646	http://www.reactome.org/PathwayBrowser/#/R-CEL-5423646	Aflatoxin activation and detoxification	IEA	Caenorhabditis elegans	10	1	1	0		10	O44650	R-CEL-2142670	http://www.reactome.org/PathwayBrowser/#/R-CEL-2142670	Synthesis of epoxy (EET) and dihydroxyeicosatrienoic acids (DHET)	1	9
O44650	R-CEL-193048	http://www.reactome.org/PathwayBrowser/#/R-CEL-193048	Androgen biosynthesis	IEA	Caenorhabditis elegans	10	1	1	0		10	O45364	R-CEL-2142670	http://www.reactome.org/PathwayBrowser/#/R-CEL-2142670	Synthesis of epoxy (EET) and dihydroxyeicosatrienoic acids (DHET)	0											No. pathways/gene		No. genes			No. of Genes/pathway	No. of pathways
O44650	R-CEL-211957	http://www.reactome.org/PathwayBrowser/#/R-CEL-211957	Aromatic amines can be N-hydroxylated or N-dealkylated by CYP1A2	IEA	Caenorhabditis elegans	10	1	1	0		10	O62377	R-CEL-2142670	http://www.reactome.org/PathwayBrowser/#/R-CEL-2142670	Synthesis of epoxy (EET) and dihydroxyeicosatrienoic acids (DHET)	0											1	8	8			1	17
Q27513	R-CEL-211979	http://www.reactome.org/PathwayBrowser/#/R-CEL-211979	Eicosanoids	IEA	Caenorhabditis elegans	2	1	1	0		1	G5EDL5	R-CEL-2142670	http://www.reactome.org/PathwayBrowser/#/R-CEL-2142670	Synthesis of epoxy (EET) and dihydroxyeicosatrienoic acids (DHET)	0											2	12	6			2	0
O44650	R-CEL-211976	http://www.reactome.org/PathwayBrowser/#/R-CEL-211976	Endogenous sterols	IEA	Caenorhabditis elegans	10	1	1	0		10	O44706	R-CEL-2142670	http://www.reactome.org/PathwayBrowser/#/R-CEL-2142670	Synthesis of epoxy (EET) and dihydroxyeicosatrienoic acids (DHET)	0											3	3	1			3	3
O18030	R-CEL-193144	http://www.reactome.org/PathwayBrowser/#/R-CEL-193144	Estrogen biosynthesis	IEA	Caenorhabditis elegans	2	1	1	0		10	O02641	R-CEL-2142670	http://www.reactome.org/PathwayBrowser/#/R-CEL-2142670	Synthesis of epoxy (EET) and dihydroxyeicosatrienoic acids (DHET)	0											4	4	1			4	0
O44650	R-CEL-194002	http://www.reactome.org/PathwayBrowser/#/R-CEL-194002	Glucocorticoid biosynthesis	IEA	Caenorhabditis elegans	10	1	1	0		10	O62378	R-CEL-2142670	http://www.reactome.org/PathwayBrowser/#/R-CEL-2142670	Synthesis of epoxy (EET) and dihydroxyeicosatrienoic acids (DHET)	0											5	0	0			5	0
O44650	R-CEL-156581	http://www.reactome.org/PathwayBrowser/#/R-CEL-156581	Methylation	IEA	Caenorhabditis elegans	10	1	1	0		10	P90771	R-CEL-2142670	http://www.reactome.org/PathwayBrowser/#/R-CEL-2142670	Synthesis of epoxy (EET) and dihydroxyeicosatrienoic acids (DHET)	0											6	0	0			6	0
O44650	R-CEL-193993	http://www.reactome.org/PathwayBrowser/#/R-CEL-193993	Mineralocorticoid biosynthesis	IEA	Caenorhabditis elegans	10	1	1	0		10	Q27531	R-CEL-2142670	http://www.reactome.org/PathwayBrowser/#/R-CEL-2142670	Synthesis of epoxy (EET) and dihydroxyeicosatrienoic acids (DHET)	0											7	0	0			7	0
Q21657	R-CEL-947581	http://www.reactome.org/PathwayBrowser/#/R-CEL-947581	Molybdenum cofactor biosynthesis	IEA	Caenorhabditis elegans	1	1	1	0		10	O44650	R-CEL-2142816	http://www.reactome.org/PathwayBrowser/#/R-CEL-2142816	Synthesis of (16-20)-hydroxyeicosatetraenoic acids (HETE)	1	8										8	0	0			8	0
O18030	R-CEL-5365859	http://www.reactome.org/PathwayBrowser/#/R-CEL-5365859	RA biosynthesis pathway	IEA	Caenorhabditis elegans	2	1	1	0		10	O45364	R-CEL-2142816	http://www.reactome.org/PathwayBrowser/#/R-CEL-2142816	Synthesis of (16-20)-hydroxyeicosatetraenoic acids (HETE)	0											9	0	0			9	0
O44650	R-CEL-2142816	http://www.reactome.org/PathwayBrowser/#/R-CEL-2142816	Synthesis of (16-20)-hydroxyeicosatetraenoic acids (HETE)	IEA	Caenorhabditis elegans	10	1	1	0		10	O62377	R-CEL-2142816	http://www.reactome.org/PathwayBrowser/#/R-CEL-2142816	Synthesis of (16-20)-hydroxyeicosatetraenoic acids (HETE)	0											10	140	14			10	0
O44650	R-CEL-2142670	http://www.reactome.org/PathwayBrowser/#/R-CEL-2142670	Synthesis of epoxy (EET) and dihydroxyeicosatrienoic acids (DHET)	IEA	Caenorhabditis elegans	10	1	1	0		10	O44706	R-CEL-2142816	http://www.reactome.org/PathwayBrowser/#/R-CEL-2142816	Synthesis of (16-20)-hydroxyeicosatetraenoic acids (HETE)	0													30			11	0
Q27513	R-CEL-2162123	http://www.reactome.org/PathwayBrowser/#/R-CEL-2162123	Synthesis of Prostaglandins (PG) and Thromboxanes (TX)	IEA	Caenorhabditis elegans	2	1	1	0		10	O02641	R-CEL-2142816	http://www.reactome.org/PathwayBrowser/#/R-CEL-2142816	Synthesis of (16-20)-hydroxyeicosatetraenoic acids (HETE)	0																12	0
O44650	R-CEL-211981	http://www.reactome.org/PathwayBrowser/#/R-CEL-211981	Xenobiotics	IEA	Caenorhabditis elegans	10	1	1	0		10	O62378	R-CEL-2142816	http://www.reactome.org/PathwayBrowser/#/R-CEL-2142816	Synthesis of (16-20)-hydroxyeicosatetraenoic acids (HETE)	0																13	0
Q8MYL7	R-CEL-3299685	http://www.reactome.org/PathwayBrowser/#/R-CEL-3299685	Detoxification of Reactive Oxygen Species	IEA	Caenorhabditis elegans	2	0	1	0		10	P90771	R-CEL-2142816	http://www.reactome.org/PathwayBrowser/#/R-CEL-2142816	Synthesis of (16-20)-hydroxyeicosatetraenoic acids (HETE)	0																14	9
Q27514	R-CEL-211979	http://www.reactome.org/PathwayBrowser/#/R-CEL-211979	Eicosanoids	IEA	Caenorhabditis elegans	2	0	1	0		10	Q27531	R-CEL-2142816	http://www.reactome.org/PathwayBrowser/#/R-CEL-2142816	Synthesis of (16-20)-hydroxyeicosatetraenoic acids (HETE)	0																15	1
Q8MYL7	R-CEL-74259	http://www.reactome.org/PathwayBrowser/#/R-CEL-74259	Purine catabolism	IEA	Caenorhabditis elegans	2	0	1	0		2	G5EBK1	R-CEL-2160916	http://www.reactome.org/PathwayBrowser/#/R-CEL-2160916	Hyaluronan uptake and degradation	1	1																30
Q20840	R-CEL-5365859	http://www.reactome.org/PathwayBrowser/#/R-CEL-5365859	RA biosynthesis pathway	IEA	Caenorhabditis elegans	1	0	1	0		2	Q27513	R-CEL-2162123	http://www.reactome.org/PathwayBrowser/#/R-CEL-2162123	Synthesis of Prostaglandins (PG) and Thromboxanes (TX)	1	3
O02621	R-CEL-2142712	http://www.reactome.org/PathwayBrowser/#/R-CEL-2142712	Synthesis of 12-eicosatetraenoic acid derivatives	IEA	Caenorhabditis elegans	2	0	1	0		2	Q27517	R-CEL-2162123	http://www.reactome.org/PathwayBrowser/#/R-CEL-2162123	Synthesis of Prostaglandins (PG) and Thromboxanes (TX)	0
O02621	R-CEL-2142770	http://www.reactome.org/PathwayBrowser/#/R-CEL-2142770	Synthesis of 15-eicosatetraenoic acid derivatives	IEA	Caenorhabditis elegans	2	0	1	0		2	Q27520	R-CEL-2162123	http://www.reactome.org/PathwayBrowser/#/R-CEL-2162123	Synthesis of Prostaglandins (PG) and Thromboxanes (TX)	0
Q27514	R-CEL-2162123	http://www.reactome.org/PathwayBrowser/#/R-CEL-2162123	Synthesis of Prostaglandins (PG) and Thromboxanes (TX)	IEA	Caenorhabditis elegans	2	0	1	0		1	B9WRT9	R-CEL-2168880	http://www.reactome.org/PathwayBrowser/#/R-CEL-2168880	Scavenging of heme from plasma	1	1
Q27470	R-CEL-5423646	http://www.reactome.org/PathwayBrowser/#/R-CEL-5423646	Aflatoxin activation and detoxification	IEA	Caenorhabditis elegans	10	0	1	0		1	G5EBJ9	R-CEL-217271	http://www.reactome.org/PathwayBrowser/#/R-CEL-217271	FMO oxidises nucleophiles	1	2
Q27470	R-CEL-193048	http://www.reactome.org/PathwayBrowser/#/R-CEL-193048	Androgen biosynthesis	IEA	Caenorhabditis elegans	10	0	1	0		1	G5ED43	R-CEL-217271	http://www.reactome.org/PathwayBrowser/#/R-CEL-217271	FMO oxidises nucleophiles	0
Q27470	R-CEL-211957	http://www.reactome.org/PathwayBrowser/#/R-CEL-211957	Aromatic amines can be N-hydroxylated or N-dealkylated by CYP1A2	IEA	Caenorhabditis elegans	10	0	1	0		1	P48996	R-CEL-2299718	http://www.reactome.org/PathwayBrowser/#/R-CEL-2299718	Condensation of Prophase Chromosomes	1	1
O61235	R-CEL-3299685	http://www.reactome.org/PathwayBrowser/#/R-CEL-3299685	Detoxification of Reactive Oxygen Species	IEA	Caenorhabditis elegans	2	0	1	0		1	O45830	R-CEL-2393930	http://www.reactome.org/PathwayBrowser/#/R-CEL-2393930	Phosphate bond hydrolysis by NUDT proteins	1	1
Q27470	R-CEL-211976	http://www.reactome.org/PathwayBrowser/#/R-CEL-211976	Endogenous sterols	IEA	Caenorhabditis elegans	10	0	1	0		1	Q19434	R-CEL-2408508	http://www.reactome.org/PathwayBrowser/#/R-CEL-2408508	Metabolism of ingested SeMet, Sec, MeSec into H2Se	1	1
Q27470	R-CEL-194002	http://www.reactome.org/PathwayBrowser/#/R-CEL-194002	Glucocorticoid biosynthesis	IEA	Caenorhabditis elegans	10	0	1	0		2	G5EGH6	R-CEL-2426168	http://www.reactome.org/PathwayBrowser/#/R-CEL-2426168	Activation of gene expression by SREBF (SREBP)	1	2
Q27470	R-CEL-156581	http://www.reactome.org/PathwayBrowser/#/R-CEL-156581	Methylation	IEA	Caenorhabditis elegans	10	0	1	0		2	Q22678	R-CEL-2426168	http://www.reactome.org/PathwayBrowser/#/R-CEL-2426168	Activation of gene expression by SREBF (SREBP)	0
Q27470	R-CEL-193993	http://www.reactome.org/PathwayBrowser/#/R-CEL-193993	Mineralocorticoid biosynthesis	IEA	Caenorhabditis elegans	10	0	1	0		2	Q9U2E4	R-CEL-2453902	http://www.reactome.org/PathwayBrowser/#/R-CEL-2453902	The canonical retinoid cycle in rods (twilight vision)	1	3
O61235	R-CEL-74259	http://www.reactome.org/PathwayBrowser/#/R-CEL-74259	Purine catabolism	IEA	Caenorhabditis elegans	2	0	1	0		2	O17851	R-CEL-2453902	http://www.reactome.org/PathwayBrowser/#/R-CEL-2453902	The canonical retinoid cycle in rods (twilight vision)	0
Q27470	R-CEL-2142816	http://www.reactome.org/PathwayBrowser/#/R-CEL-2142816	Synthesis of (16-20)-hydroxyeicosatetraenoic acids (HETE)	IEA	Caenorhabditis elegans	10	0	1	0		2	Q9TXT9	R-CEL-2453902	http://www.reactome.org/PathwayBrowser/#/R-CEL-2453902	The canonical retinoid cycle in rods (twilight vision)	0
Q27470	R-CEL-2142670	http://www.reactome.org/PathwayBrowser/#/R-CEL-2142670	Synthesis of epoxy (EET) and dihydroxyeicosatrienoic acids (DHET)	IEA	Caenorhabditis elegans	10	0	1	0		2	K8FE10	R-CEL-264642	http://www.reactome.org/PathwayBrowser/#/R-CEL-264642	Acetylcholine Neurotransmitter Release Cycle	1	1
Q27470	R-CEL-211981	http://www.reactome.org/PathwayBrowser/#/R-CEL-211981	Xenobiotics	IEA	Caenorhabditis elegans	10	0	1	0		2	Q8I4E5	R-CEL-2672351	http://www.reactome.org/PathwayBrowser/#/R-CEL-2672351	Stimuli-sensing channels	1	1
G5EGU4	R-CEL-1971475	http://www.reactome.org/PathwayBrowser/#/R-CEL-1971475	A tetrasaccharide linker sequence is required for GAG synthesis	IEA	Caenorhabditis elegans	5	1	0	0		4	G5EEE7	R-CEL-2682334	http://www.reactome.org/PathwayBrowser/#/R-CEL-2682334	EPH-Ephrin signaling	1	1
Q22574	R-CEL-1971475	http://www.reactome.org/PathwayBrowser/#/R-CEL-1971475	A tetrasaccharide linker sequence is required for GAG synthesis	IEA	Caenorhabditis elegans	7	1	0	0		7	Q22574	R-CEL-3000157	http://www.reactome.org/PathwayBrowser/#/R-CEL-3000157	Laminin interactions	1	1
Q20500	R-CEL-1482788	http://www.reactome.org/PathwayBrowser/#/R-CEL-1482788	Acyl chain remodelling of PC	IEA	Caenorhabditis elegans	4	1	0	0		7	Q22574	R-CEL-3000171	http://www.reactome.org/PathwayBrowser/#/R-CEL-3000171	Non-integrin membrane-ECM interactions	1	1
Q95QL1	R-CEL-1482788	http://www.reactome.org/PathwayBrowser/#/R-CEL-1482788	Acyl chain remodelling of PC	IEA	Caenorhabditis elegans	2	1	0	0		7	Q22574	R-CEL-3000178	http://www.reactome.org/PathwayBrowser/#/R-CEL-3000178	ECM proteoglycans	1	1
Q20500	R-CEL-1482839	http://www.reactome.org/PathwayBrowser/#/R-CEL-1482839	Acyl chain remodelling of PE	IEA	Caenorhabditis elegans	4	1	0	0		3	O45813	R-CEL-352230	http://www.reactome.org/PathwayBrowser/#/R-CEL-352230	Amino acid transport across the plasma membrane	1	2
O44706	R-CEL-5423646	http://www.reactome.org/PathwayBrowser/#/R-CEL-5423646	Aflatoxin activation and detoxification	IEA	Caenorhabditis elegans	10	1	0	0		1	Q19151	R-CEL-352230	http://www.reactome.org/PathwayBrowser/#/R-CEL-352230	Amino acid transport across the plasma membrane	0
Q22324	R-CEL-198323	http://www.reactome.org/PathwayBrowser/#/R-CEL-198323	AKT phosphorylates targets in the cytosol	IEA	Caenorhabditis elegans	3	1	0	0		1	Q9U325	R-CEL-375170	http://www.reactome.org/PathwayBrowser/#/R-CEL-375170	CDO in myogenesis	1	1
P41829	R-CEL-198693	http://www.reactome.org/PathwayBrowser/#/R-CEL-198693	AKT phosphorylates targets in the nucleus	IEA	Caenorhabditis elegans	1	1	0	0		5	G5EGU4	R-CEL-376176	http://www.reactome.org/PathwayBrowser/#/R-CEL-376176	Signaling by Robo receptor	1	1
Q21544	R-CEL-70614	http://www.reactome.org/PathwayBrowser/#/R-CEL-70614	Amino acid synthesis and interconversion (transamination)	IEA	Caenorhabditis elegans	1	1	0	0		2	O62122	R-CEL-389661	http://www.reactome.org/PathwayBrowser/#/R-CEL-389661	Glyoxylate metabolism and glycine degradation	1	1
O44706	R-CEL-193048	http://www.reactome.org/PathwayBrowser/#/R-CEL-193048	Androgen biosynthesis	IEA	Caenorhabditis elegans	10	1	0	0		3	G5EDP2	R-CEL-389887	http://www.reactome.org/PathwayBrowser/#/R-CEL-389887	Beta-oxidation of pristanoyl-CoA	1	3
G5EEX4	R-CEL-983168	http://www.reactome.org/PathwayBrowser/#/R-CEL-983168	Antigen processing: Ubiquitination & Proteasome degradation	IEA	Caenorhabditis elegans	6	1	0	0		5	Q9U1Q5	R-CEL-389887	http://www.reactome.org/PathwayBrowser/#/R-CEL-389887	Beta-oxidation of pristanoyl-CoA	0
G5EFA9	R-CEL-983168	http://www.reactome.org/PathwayBrowser/#/R-CEL-983168	Antigen processing: Ubiquitination & Proteasome degradation	IEA	Caenorhabditis elegans	6	1	0	0		1	Q9XUN8	R-CEL-389887	http://www.reactome.org/PathwayBrowser/#/R-CEL-389887	Beta-oxidation of pristanoyl-CoA	0
G5EG39	R-CEL-983168	http://www.reactome.org/PathwayBrowser/#/R-CEL-983168	Antigen processing: Ubiquitination & Proteasome degradation	IEA	Caenorhabditis elegans	6	1	0	0		4	O45730	R-CEL-390247	http://www.reactome.org/PathwayBrowser/#/R-CEL-390247	Beta-oxidation of very long chain fatty acids	1	2
O44706	R-CEL-211957	http://www.reactome.org/PathwayBrowser/#/R-CEL-211957	Aromatic amines can be N-hydroxylated or N-dealkylated by CYP1A2	IEA	Caenorhabditis elegans	10	1	0	0		5	Q9U1Q5	R-CEL-390247	http://www.reactome.org/PathwayBrowser/#/R-CEL-390247	Beta-oxidation of very long chain fatty acids	0
O18251	R-CEL-450385	http://www.reactome.org/PathwayBrowser/#/R-CEL-450385	Butyrate Response Factor 1 (BRF1) binds and destabilizes mRNA	IEA	Caenorhabditis elegans	1	1	0	0		4	G5EEE7	R-CEL-3928662	http://www.reactome.org/PathwayBrowser/#/R-CEL-3928662	EPHB-mediated forward signaling	1	2
O17697	R-CEL-1296052	http://www.reactome.org/PathwayBrowser/#/R-CEL-1296052	Ca2+ activated K+ channels	IEA	Caenorhabditis elegans	1	1	0	0		5	O01847	R-CEL-3928662	http://www.reactome.org/PathwayBrowser/#/R-CEL-3928662	EPHB-mediated forward signaling	0
O17352	R-CEL-901042	http://www.reactome.org/PathwayBrowser/#/R-CEL-901042	Calnexin/calreticulin cycle	IEA	Caenorhabditis elegans	2	1	0	0		4	G5EEE7	R-CEL-3928664	http://www.reactome.org/PathwayBrowser/#/R-CEL-3928664	Ephrin signaling	1	2
P41941	R-CEL-5694530	http://www.reactome.org/PathwayBrowser/#/R-CEL-5694530	Cargo concentration in the ER	IEA	Caenorhabditis elegans	4	1	0	0		6	Q21430	R-CEL-3928664	http://www.reactome.org/PathwayBrowser/#/R-CEL-3928664	Ephrin signaling	0
O16289	R-CEL-1442490	http://www.reactome.org/PathwayBrowser/#/R-CEL-1442490	Collagen degradation	IEA	Caenorhabditis elegans	2	1	0	0		4	G5EEE7	R-CEL-3928665	http://www.reactome.org/PathwayBrowser/#/R-CEL-3928665	EPH-ephrin mediated repulsion of cells	1	2
P43507	R-CEL-1442490	http://www.reactome.org/PathwayBrowser/#/R-CEL-1442490	Collagen degradation	IEA	Caenorhabditis elegans	2	1	0	0		5	O01847	R-CEL-3928665	http://www.reactome.org/PathwayBrowser/#/R-CEL-3928665	EPH-ephrin mediated repulsion of cells	0
Q20950	R-CEL-1442490	http://www.reactome.org/PathwayBrowser/#/R-CEL-1442490	Collagen degradation	IEA	Caenorhabditis elegans	2	1	0	0		3	Q21653	R-CEL-416482	http://www.reactome.org/PathwayBrowser/#/R-CEL-416482	G alpha (12/13) signalling events	1	3
P41941	R-CEL-204005	http://www.reactome.org/PathwayBrowser/#/R-CEL-204005	COPII (Coat Protein 2) Mediated Vesicle Transport	IEA	Caenorhabditis elegans	4	1	0	0		5	O01847	R-CEL-416482	http://www.reactome.org/PathwayBrowser/#/R-CEL-416482	G alpha (12/13) signalling events	0
Q20500	R-CEL-6811436	http://www.reactome.org/PathwayBrowser/#/R-CEL-6811436	COPI-independent Golgi-to-ER retrograde traffic	IEA	Caenorhabditis elegans	4	1	0	0		6	Q21430	R-CEL-416482	http://www.reactome.org/PathwayBrowser/#/R-CEL-416482	G alpha (12/13) signalling events	0
P41941	R-CEL-6807878	http://www.reactome.org/PathwayBrowser/#/R-CEL-6807878	COPI-mediated anterograde transport	IEA	Caenorhabditis elegans	4	1	0	0		3	Q9TYP9	R-CEL-418359	http://www.reactome.org/PathwayBrowser/#/R-CEL-418359	Reduction of cytosolic Ca++ levels	1	1
G5EEX4	R-CEL-69231	http://www.reactome.org/PathwayBrowser/#/R-CEL-69231	Cyclin D associated events in G1	IEA	Caenorhabditis elegans	6	1	0	0		1	O01661	R-CEL-422356	http://www.reactome.org/PathwayBrowser/#/R-CEL-422356	Regulation of insulin secretion	1	2
G5EFA9	R-CEL-69231	http://www.reactome.org/PathwayBrowser/#/R-CEL-69231	Cyclin D associated events in G1	IEA	Caenorhabditis elegans	6	1	0	0		6	O44616	R-CEL-422356	http://www.reactome.org/PathwayBrowser/#/R-CEL-422356	Regulation of insulin secretion	0
G5EG39	R-CEL-69231	http://www.reactome.org/PathwayBrowser/#/R-CEL-69231	Cyclin D associated events in G1	IEA	Caenorhabditis elegans	6	1	0	0		2	G5EBK1	R-CEL-425986	http://www.reactome.org/PathwayBrowser/#/R-CEL-425986	Sodium/Proton exchangers	1	1
Q22324	R-CEL-5607761	http://www.reactome.org/PathwayBrowser/#/R-CEL-5607761	Dectin-1 mediated noncanonical NF-kB signaling	IEA	Caenorhabditis elegans	3	1	0	0		1	Q17454	R-CEL-427652	http://www.reactome.org/PathwayBrowser/#/R-CEL-427652	Sodium-coupled phosphate cotransporters	1	1
G5EEX4	R-CEL-195253	http://www.reactome.org/PathwayBrowser/#/R-CEL-195253	Degradation of beta-catenin by the destruction complex	IEA	Caenorhabditis elegans	6	1	0	0		2	G5EEK1	R-CEL-428643	http://www.reactome.org/PathwayBrowser/#/R-CEL-428643	Organic anion transporters	1	1
G5EFA9	R-CEL-195253	http://www.reactome.org/PathwayBrowser/#/R-CEL-195253	Degradation of beta-catenin by the destruction complex	IEA	Caenorhabditis elegans	6	1	0	0		6	O44616	R-CEL-428790	http://www.reactome.org/PathwayBrowser/#/R-CEL-428790	Facilitative Na+-independent glucose transporters	1	1
G5EG39	R-CEL-195253	http://www.reactome.org/PathwayBrowser/#/R-CEL-195253	Degradation of beta-catenin by the destruction complex	IEA	Caenorhabditis elegans	6	1	0	0		5	G5EGU4	R-CEL-428890	http://www.reactome.org/PathwayBrowser/#/R-CEL-428890	Role of Abl in Robo-Slit signaling	1	1
Q22574	R-CEL-1474228	http://www.reactome.org/PathwayBrowser/#/R-CEL-1474228	Degradation of the extracellular matrix	IEA	Caenorhabditis elegans	7	1	0	0		4	Q9XXT5	R-CEL-4419969	http://www.reactome.org/PathwayBrowser/#/R-CEL-4419969	Depolymerisation of the Nuclear Lamina	1	1
Q22574	R-CEL-3000178	http://www.reactome.org/PathwayBrowser/#/R-CEL-3000178	ECM proteoglycans	IEA	Caenorhabditis elegans	7	1	0	0		3	O45813	R-CEL-442660	http://www.reactome.org/PathwayBrowser/#/R-CEL-442660	Na+/Cl- dependent neurotransmitter transporters	1	1
Q27517	R-CEL-211979	http://www.reactome.org/PathwayBrowser/#/R-CEL-211979	Eicosanoids	IEA	Caenorhabditis elegans	2	1	0	0		1	P34650	R-CEL-446205	http://www.reactome.org/PathwayBrowser/#/R-CEL-446205	Synthesis of GDP-mannose	1	1
Q27520	R-CEL-211979	http://www.reactome.org/PathwayBrowser/#/R-CEL-211979	Eicosanoids	IEA	Caenorhabditis elegans	2	1	0	0		6	Q21430	R-CEL-446388	http://www.reactome.org/PathwayBrowser/#/R-CEL-446388	Regulation of cytoskeletal remodeling and cell spreading by IPP complex components	1	1
O44706	R-CEL-211976	http://www.reactome.org/PathwayBrowser/#/R-CEL-211976	Endogenous sterols	IEA	Caenorhabditis elegans	10	1	0	0		10	G5ECP4	R-CEL-446652	http://www.reactome.org/PathwayBrowser/#/R-CEL-446652	Interleukin-1 signaling	1	1
G5EEE7	R-CEL-3928662	http://www.reactome.org/PathwayBrowser/#/R-CEL-3928662	EPHB-mediated forward signaling	IEA	Caenorhabditis elegans	4	1	0	0		10	G5ECP4	R-CEL-450302	http://www.reactome.org/PathwayBrowser/#/R-CEL-450302	activated TAK1 mediates p38 MAPK activation	1	1
G5EEE7	R-CEL-3928665	http://www.reactome.org/PathwayBrowser/#/R-CEL-3928665	EPH-ephrin mediated repulsion of cells	IEA	Caenorhabditis elegans	4	1	0	0		10	G5ECP4	R-CEL-450321	http://www.reactome.org/PathwayBrowser/#/R-CEL-450321	JNK (c-Jun kinases) phosphorylation and activation mediated by activated human TAK1	1	1
G5EEE7	R-CEL-2682334	http://www.reactome.org/PathwayBrowser/#/R-CEL-2682334	EPH-Ephrin signaling	IEA	Caenorhabditis elegans	4	1	0	0		1	O18251	R-CEL-450385	http://www.reactome.org/PathwayBrowser/#/R-CEL-450385	Butyrate Response Factor 1 (BRF1) binds and destabilizes mRNA	1	2
G5EEE7	R-CEL-3928664	http://www.reactome.org/PathwayBrowser/#/R-CEL-3928664	Ephrin signaling	IEA	Caenorhabditis elegans	4	1	0	0		1	Q9XV46	R-CEL-450385	http://www.reactome.org/PathwayBrowser/#/R-CEL-450385	Butyrate Response Factor 1 (BRF1) binds and destabilizes mRNA	0
G5EFG0	R-CEL-901032	http://www.reactome.org/PathwayBrowser/#/R-CEL-901032	ER Quality Control Compartment (ERQC)	IEA	Caenorhabditis elegans	2	1	0	0		1	Q20140	R-CEL-499943	http://www.reactome.org/PathwayBrowser/#/R-CEL-499943	Synthesis and interconversion of nucleotide di- and triphosphates	1	1
Q27504	R-CEL-1237044	http://www.reactome.org/PathwayBrowser/#/R-CEL-1237044	Erythrocytes take up carbon dioxide and release oxygen	IEA	Caenorhabditis elegans	3	1	0	0		1	O61790	R-CEL-500753	http://www.reactome.org/PathwayBrowser/#/R-CEL-500753	Pyrimidine biosynthesis	1	1
Q27504	R-CEL-1247673	http://www.reactome.org/PathwayBrowser/#/R-CEL-1247673	Erythrocytes take up oxygen and release carbon dioxide	IEA	Caenorhabditis elegans	3	1	0	0		1	Q22631	R-CEL-5173214	http://www.reactome.org/PathwayBrowser/#/R-CEL-5173214	O-glycosylation of TSR domain-containing proteins	1	1
Q9TXU7	R-CEL-72689	http://www.reactome.org/PathwayBrowser/#/R-CEL-72689	Formation of a pool of free 40S subunits	IEA	Caenorhabditis elegans	4	1	0	0		2	O17352	R-CEL-532668	http://www.reactome.org/PathwayBrowser/#/R-CEL-532668	N-glycan trimming in the ER and Calnexin/Calreticulin cycle	1	1
Q9TXU7	R-CEL-72695	http://www.reactome.org/PathwayBrowser/#/R-CEL-72695	Formation of the ternary complex, and subsequently, the 43S complex	IEA	Caenorhabditis elegans	4	1	0	0		2	G5EFG0	R-CEL-5358346	http://www.reactome.org/PathwayBrowser/#/R-CEL-5358346	Hedgehog ligand biogenesis	1	1
Q21653	R-CEL-416482	http://www.reactome.org/PathwayBrowser/#/R-CEL-416482	G alpha (12/13) signalling events	IEA	Caenorhabditis elegans	3	1	0	0		2	O18030	R-CEL-5365859	http://www.reactome.org/PathwayBrowser/#/R-CEL-5365859	RA biosynthesis pathway	1	2
O44706	R-CEL-194002	http://www.reactome.org/PathwayBrowser/#/R-CEL-194002	Glucocorticoid biosynthesis	IEA	Caenorhabditis elegans	10	1	0	0		1	Q20012	R-CEL-5365859	http://www.reactome.org/PathwayBrowser/#/R-CEL-5365859	RA biosynthesis pathway	0
O62334	R-CEL-70221	http://www.reactome.org/PathwayBrowser/#/R-CEL-70221	Glycogen breakdown (glycogenolysis)	IEA	Caenorhabditis elegans	1	1	0	0		10	O44650	R-CEL-5423646	http://www.reactome.org/PathwayBrowser/#/R-CEL-5423646	Aflatoxin activation and detoxification	1	8
G5EC84	R-CEL-1660662	http://www.reactome.org/PathwayBrowser/#/R-CEL-1660662	Glycosphingolipid metabolism	IEA	Caenorhabditis elegans	1	1	0	0		10	O45364	R-CEL-5423646	http://www.reactome.org/PathwayBrowser/#/R-CEL-5423646	Aflatoxin activation and detoxification	0
Q21801	R-CEL-1660662	http://www.reactome.org/PathwayBrowser/#/R-CEL-1660662	Glycosphingolipid metabolism	IEA	Caenorhabditis elegans	1	1	0	0		10	O62377	R-CEL-5423646	http://www.reactome.org/PathwayBrowser/#/R-CEL-5423646	Aflatoxin activation and detoxification	0
G5EFG0	R-CEL-5358346	http://www.reactome.org/PathwayBrowser/#/R-CEL-5358346	Hedgehog ligand biogenesis	IEA	Caenorhabditis elegans	2	1	0	0		10	O44706	R-CEL-5423646	http://www.reactome.org/PathwayBrowser/#/R-CEL-5423646	Aflatoxin activation and detoxification	0
G5EGU4	R-CEL-2022928	http://www.reactome.org/PathwayBrowser/#/R-CEL-2022928	HS-GAG biosynthesis	IEA	Caenorhabditis elegans	5	1	0	0		10	O02641	R-CEL-5423646	http://www.reactome.org/PathwayBrowser/#/R-CEL-5423646	Aflatoxin activation and detoxification	0
Q22574	R-CEL-2022928	http://www.reactome.org/PathwayBrowser/#/R-CEL-2022928	HS-GAG biosynthesis	IEA	Caenorhabditis elegans	7	1	0	0		10	O62378	R-CEL-5423646	http://www.reactome.org/PathwayBrowser/#/R-CEL-5423646	Aflatoxin activation and detoxification	0
G5EGU4	R-CEL-2024096	http://www.reactome.org/PathwayBrowser/#/R-CEL-2024096	HS-GAG degradation	IEA	Caenorhabditis elegans	5	1	0	0		10	P90771	R-CEL-5423646	http://www.reactome.org/PathwayBrowser/#/R-CEL-5423646	Aflatoxin activation and detoxification	0
Q22574	R-CEL-2024096	http://www.reactome.org/PathwayBrowser/#/R-CEL-2024096	HS-GAG degradation	IEA	Caenorhabditis elegans	7	1	0	0		10	Q27531	R-CEL-5423646	http://www.reactome.org/PathwayBrowser/#/R-CEL-5423646	Aflatoxin activation and detoxification	0
G5EBK1	R-CEL-2160916	http://www.reactome.org/PathwayBrowser/#/R-CEL-2160916	Hyaluronan uptake and degradation	IEA	Caenorhabditis elegans	2	1	0	0		2	Q8I4E5	R-CEL-5578775	http://www.reactome.org/PathwayBrowser/#/R-CEL-5578775	Ion homeostasis	1	2
P41941	R-CEL-6811438	http://www.reactome.org/PathwayBrowser/#/R-CEL-6811438	Intra-Golgi traffic	IEA	Caenorhabditis elegans	4	1	0	0		3	Q9TYP9	R-CEL-5578775	http://www.reactome.org/PathwayBrowser/#/R-CEL-5578775	Ion homeostasis	0
Q9TXU7	R-CEL-156827	http://www.reactome.org/PathwayBrowser/#/R-CEL-156827	L13a-mediated translational silencing of Ceruloplasmin expression	IEA	Caenorhabditis elegans	4	1	0	0		3	Q22324	R-CEL-5607761	http://www.reactome.org/PathwayBrowser/#/R-CEL-5607761	Dectin-1 mediated noncanonical NF-kB signaling	1	1
Q22574	R-CEL-3000157	http://www.reactome.org/PathwayBrowser/#/R-CEL-3000157	Laminin interactions	IEA	Caenorhabditis elegans	7	1	0	0		2	Q21703	R-CEL-5652227	http://www.reactome.org/PathwayBrowser/#/R-CEL-5652227	Fructose biosynthesis	1	1
Q22085	R-CEL-975298	http://www.reactome.org/PathwayBrowser/#/R-CEL-975298	Ligand-gated ion channel transport	IEA	Caenorhabditis elegans	1	1	0	0		6	O44616	R-CEL-5653890	http://www.reactome.org/PathwayBrowser/#/R-CEL-5653890	Lactose synthesis	1	1
Q19434	R-CEL-2408508	http://www.reactome.org/PathwayBrowser/#/R-CEL-2408508	Metabolism of ingested SeMet, Sec, MeSec into H2Se	IEA	Caenorhabditis elegans	1	1	0	0		1	P30646	R-CEL-5661270	http://www.reactome.org/PathwayBrowser/#/R-CEL-5661270	Catabolism of glucuronate to xylulose-5-phosphate	1	2
O44706	R-CEL-156581	http://www.reactome.org/PathwayBrowser/#/R-CEL-156581	Methylation	IEA	Caenorhabditis elegans	10	1	0	0		2	Q21703	R-CEL-5661270	http://www.reactome.org/PathwayBrowser/#/R-CEL-5661270	Catabolism of glucuronate to xylulose-5-phosphate	0
O44706	R-CEL-193993	http://www.reactome.org/PathwayBrowser/#/R-CEL-193993	Mineralocorticoid biosynthesis	IEA	Caenorhabditis elegans	10	1	0	0		3	Q22324	R-CEL-5676590	http://www.reactome.org/PathwayBrowser/#/R-CEL-5676590	NIK-->noncanonical NF-kB signaling	1	1
O17352	R-CEL-532668	http://www.reactome.org/PathwayBrowser/#/R-CEL-532668	N-glycan trimming in the ER and Calnexin/Calreticulin cycle	IEA	Caenorhabditis elegans	2	1	0	0		4	P41941	R-CEL-5694530	http://www.reactome.org/PathwayBrowser/#/R-CEL-5694530	Cargo concentration in the ER	1	1
Q22324	R-CEL-5676590	http://www.reactome.org/PathwayBrowser/#/R-CEL-5676590	NIK-->noncanonical NF-kB signaling	IEA	Caenorhabditis elegans	3	1	0	0		1	Q21645	R-CEL-629594	http://www.reactome.org/PathwayBrowser/#/R-CEL-629594	Highly calcium permeable postsynaptic nicotinic acetylcholine receptors	1	1
Q22574	R-CEL-3000171	http://www.reactome.org/PathwayBrowser/#/R-CEL-3000171	Non-integrin membrane-ECM interactions	IEA	Caenorhabditis elegans	7	1	0	0		2	O62122	R-CEL-6783984	http://www.reactome.org/PathwayBrowser/#/R-CEL-6783984	Glycine degradation	1	1
[truncated: 222 more rows]
